# Supplementary material for: Isothiourea-catalysed enantioselective Michael addition of N-heterocyclic pronucleophiles to α,β-unsaturated aryl esters
Source: Royal Society of Chemistry journal article supplement (doi:10.1039/c9sc04303a), 2019-10-23
Supplement: c9sc04303a1.pdf [file c9sc04303a1.pdf]

# Isothiourea-Catalysed Enantioselective Michael Addition of *N*-heterocyclic Pronucleophiles to $\alpha,\beta$ -Unsaturated Aryl Esters

Chang Shu, Honglei Liu, Alexandra. M. Z. Slawin, Cameron Carpenter-Warren and Andrew D. Smith\*

EaStCHEM, School of Chemistry, University of St Andrews, North Haugh, St Andrews, Fife, KY16 9ST, UK

## Supporting Information

### Table of Contents

|                                                                    |      |
|--------------------------------------------------------------------|------|
| 1. General Information                                             | S2   |
| 2. General Procedures                                              | S4   |
| 3. Preparation of Starting Materials                               | S8   |
| 4. Michael Addition Products                                       | S19  |
| 5. Determination of Product Configuration by X-ray Crystallography | S49  |
| 6. References                                                      | S51  |
| Appendix I: Reaction of Unsuccessful Pronucleophiles               | S52  |
| Appendix II: Supplementary Optimisation Studies                    | S53  |
| Appendix III: NMR Spectra                                          | S55  |
| Appendix IV: HPLC Spectra                                          | S131 |

## 1 General Information

Reactions involving moisture sensitive reagents were carried out in flame-dried glassware under an argon or nitrogen atmosphere using standard vacuum line techniques and using anhydrous solvents. Anhydrous solvents (THF, CH<sub>2</sub>Cl<sub>2</sub> and toluene) were obtained from an anhydrous solvent system (purified using an alumina column, Mbraun SPS-800). All other reactions were performed in standard glassware with no precautions to exclude air or moisture. Solvents and commercial reagents were used as supplied without further purification unless otherwise stated.

Room temperature (r.t.) refers to 20-25 °C. Temperatures of 0 °C and -78 °C were obtained using ice/water and CO<sub>2</sub>(s)/acetone baths, respectively. Temperatures of -40 °C for overnight reactions were obtained using an immersion cooler (HAAKE EK 90). Reflux conditions were obtained using a DrySyn, oil bath or sand bath equipped with a contact thermometer.

'*In vacuo*' refers to the use of either a Büchi Rotavapor R-200 with a Büchi V-491 heating bath and Büchi V-800 vacuum controller, a Büchi Rotavapor R-210 with a Büchi V-491 heating bath and Büchi V-850 vacuum controller, a Heidolph Laborota 4001 with vacuum controller, an IKA RV10 rotary evaporator with a IKA HB10 heating bath and ILMVAC vacuum controller, or an IKA RV10 rotary evaporator with a IKA HB10 heating bath and Vacuubrand CVC3000 vacuum controller. Rotary evaporator condensers are fitted to Julabo FL601 Recirculating Coolers filled with ethylene glycol and set to -5 °C.

Analytical thin layer chromatography was performed on pre-coated aluminium plates (Kieselgel 60 F<sub>254</sub> silica). TLC visualisation was carried out with ultraviolet light (254 nm), followed by staining with a 1% aqueous KMnO<sub>4</sub> solution. Manual column chromatography was performed in glass columns fitted with porosity 3 sintered discs over Kieselgel 60 silica using the solvent system stated. Automated chromatography was performed on a Biotage Isolera Four running Biotage OS578 with a UV/Vis detector using the method stated and cartridges filled with Kieselgel 60 silica.

Melting points were recorded on an Electrothermal 9100 melting point apparatus and are uncorrected.

Optical rotations were measured on a PerkinElmer Precisly/Model-341 polarimeter operating at the sodium D line with a 100 mm path cell at 20 °C.

HPLC analyses were obtained using either a Shimadzu HPLC consisting of a DGU-20A5 degassing unit, LC-20AT liquid chromatography pump, SIL-20AHT autosampler, CMB-20A communications bus module, SPD-M20A diode array detector and a CTO-20A column oven; or a Shimadzu HPLC consisting of a DGU-20A5R degassing unit, LC-20AD liquid chromatography pump, SIL-20AHT autosampler, SPD-20A UV/Vis detector and a CTO-20A column oven. Separation was achieved using DAICEL CHIRALCEL OD-H and OJ-H columns or DAICEL CHIRALPAK AD-H, AS-H, IA, IB, IC and ID columns. All HPLC traces of enantiomerically-enriched compounds were compared with authentic racemic spectra.

<sup>1</sup>H, <sup>13</sup>C, <sup>19</sup>F nuclear magnetic resonance (NMR) spectra were acquired on either a Bruker Avance 300 (<sup>1</sup>H 300 MHz), Bruker Avance II 400 (<sup>1</sup>H 400 MHz; <sup>13</sup>C 101 MHz; <sup>19</sup>F 376 MHz) or a Bruker Avance II 500 (<sup>1</sup>H 500 MHz; <sup>13</sup>C 126 MHz) spectrometer at ambient temperature in the deuterated solvent stated. All chemical shifts are quoted in parts per million (ppm) and referenced to the residual solvent peak. All coupling constants, J, are quoted in Hz. Multiplicities are indicated by: s (singlet), d (doublet), t (triplet), q (quartet), sept (septet), dd (doublet of doublets), dt (doublet of triplets), dq (doublet of quartets), td

(triplet of doublets), tt (triplet of triplets), ddd (doublet of doublet of doublets), ddt (doublet of doublet of triplets) dddd (doublet of doublet of doublet of doublets), dddt (doublet of doublet of doublet of triplets), and m (multiplet). The abbreviation Ar is used to denote aromatic, Ph to denote phenyl, Bn to denote benzyl, br to denote broad and app to denote apparent.

Infrared spectra were recorded on a Shimadzu IRAffinity-1 Fourier transform IR spectrophotometer fitted with a Specac Quest ATR accessory (diamond puck). Spectra were recorded of either thin films or solids, with characteristic absorption wave numbers (max) reported in  $\text{cm}^{-1}$ .

Mass spectrometry ( $m/z$ ) data were acquired by electrospray ionization (ESI), electron impact (EI), atmospheric pressure chemical ionization (APCI) or nanospray ionization (NSI) either at the University of St Andrews or the EPSRC National Mass Spectrometry Facility, Swansea.

## 2 General Procedures

### General Procedure 1: Synthesis of $\alpha,\beta$ -unsaturated aryl esters

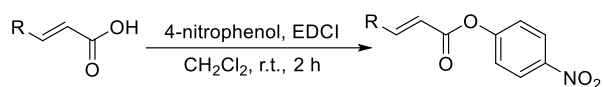

To a solution of  $\alpha, \beta$ -unsaturated acid (1.0 equiv.) and EDCI (1.2 equiv.) in anhydrous dichloromethane (0.67 M) was added 4-nitrophenol (1.1 equiv.) at room temperature. The resulting solution was stirred at r.t. for 2 h till the total consumption of starting material. The solvent was removed *in vacuo*, and the yellow residue was purified by flash silica column chromatography using a mixture of petroleum ether and ethyl acetate as eluent.

### General Procedure 2: Synthesis of 2-phenylthiazol-4(5H)-one<sup>1</sup>

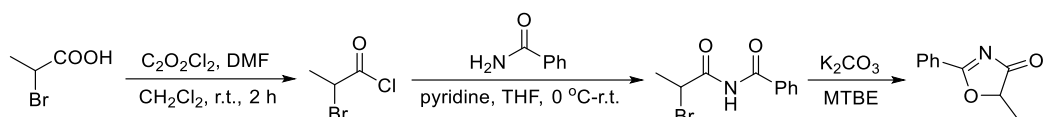

A solution of oxalyl chloride (4.1 mL, 48 mmol) in dry dichloromethane (24 mL) was added slowly to a stirred solution of the corresponding 2-bromopropanoic acid (6.12 g, 40 mmol) in dichloromethane (20 mL) at 0 °C, then 2 drops of DMF were added. Gas evolution was observed, and the system was allowed to stir at room temperature for 2 additional hours. Volatiles were removed under reduced pressure and the resulting crude 2-bromopropanoyl chloride was subject to next step.

To a solution of benzamide (4.8 g, 40 mmol) and pyridine (3.24 mL, 40 mmol) in THF (50 mL) was added the corresponding 2-bromopropanoyl chloride (6.86 g, 40 mmol) dropwise over 5 min at 0 °C. The resulting suspension was stirred overnight at room temperature and diluted with EtOAc. The mixture was acidified to ca. pH 2 with 1N HCl aq. and the phases were separated. The aqueous phase was extracted with EtOAc (3 × 80 mL) and the combined organic layers were washed with water (3 × 80 mL) and brine (80 mL), dried over MgSO<sub>4</sub>, and filtered. Volatiles were removed under reduced pressure. The *N*-(2-bromopropanoyl) benzamide product was purified by flash chromatography on silica gel (eluting with hexane/ ethyl acetate 90/10).

A suspension of K<sub>2</sub>CO<sub>3</sub> (4.0 g, 40 mmol) in methyl *tert*-butylether (MTBE) (40 mL) was refluxed for 2 h to remove water using a Dean-Stark trap. The suspension was cooled to room temperature and the corresponding imide (5.12 g, 20 mmol) was added in one portion. The resulting mixture was refluxed overnight and cooled to room temperature. Inorganic salts were filtered through a celite pad with suction and the filter cake was washed with EtOAc. The combined organic layers were concentrated *in vacuo* and purified by flash chromatography on silica gel (eluting with hexane/ ethyl acetate 80/20).

### General Procedure 3: Synthesis of 5-methyl-2-phenylthiazol-4(5H)-one<sup>2</sup>

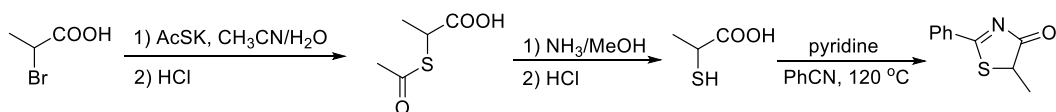

To a solution of the DL-2-bromopropionic acid (2.55 g, 16.7 mmol) in 40 mL of CH<sub>3</sub>CN was added a solution of potassium thioacetate (3.8 g, 33.3 mmol) in H<sub>2</sub>O (10 mL), and the mixture was stirred for 3 h. The organic solvent was evaporated and the mixture was diluted with H<sub>2</sub>O and washed with CH<sub>2</sub>Cl<sub>2</sub>.

The aqueous phase was acidified with concentrated hydrochloric acid, extracted with  $\text{CH}_2\text{Cl}_2$  ( $3 \times 17$  mL), dried over  $\text{MgSO}_4$  and concentrated to afford the  $\alpha$ -(acetylthio) carboxylic acid as an off white solid. Subsequently, the solid was dissolved in MeOH (10 mL) at 0 °C and ammonia (7N in MeOH, 18 mL) was added to the solution. The mixture was allowed to warm up to room temperature and stirred for 1 h. The organic solvent was then completely evaporated under reduced pressure and the residue was dissolved in a saturated aqueous solution of  $\text{NaHCO}_3$ . The solution was washed with EtOAc, the aqueous phase was acidified with concentrated hydrochloric acid and extracted with EtOAc. The organic layers were combined, dried over  $\text{MgSO}_4$  and the solvent was evaporated under reduced pressure to afford the  $\alpha$ -mercaptopropanoic acid without further purification.

Under the  $\text{N}_2$  atmosphere, to a mixture of PhCN (612.6  $\mu\text{L}$ , 6 mmol) and pyridine (97  $\mu\text{L}$ , 1.2 mmol) was added the  $\alpha$ -mercaptocarboxylic acid (636.8 mg, 6 mmol) at room temperature, and the mixture was stirred overnight at 120 °C. After cooling to room temperature, a yellow solid could be observed, and was collected by filtration and washed with cold methanol to give the pure product.

**General Procedure 4: Synthesis of oxazol-5-ones<sup>3</sup>**

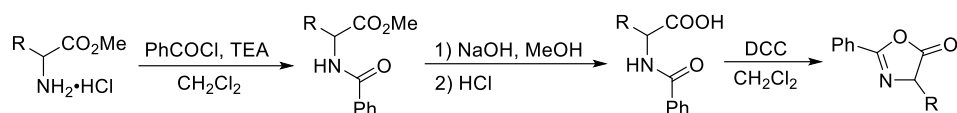

$\text{CH}_2\text{Cl}_2$  (90 mL) and TEA (7.6 mL, 54.7 mmol) were added to a flask containing Alanine methyl ester hydrochloride (23.75 mmol). The resulting slurry was cooled to 0 °C, and benzoyl chloride (2.68 mL, 23.3 mmol) in  $\text{CH}_2\text{Cl}_2$  (7 mL) was added by cannula over 15 min. After 75 min, the ice bath was removed, and the mixture was stirred at room temperature for 4 h. The mixture was then washed with 1 N HCl ( $2 \times 75$  mL), saturated  $\text{NaHCO}_3$  ( $2 \times 75$  mL) and saturated NaCl (75 mL). The  $\text{CH}_2\text{Cl}_2$  layer was dried with  $\text{MgSO}_4$ , and the solvent was removed by rotary evaporation, providing amide as a white solid. The solid was dissolved in MeOH (40 mL), and 2 N aqueous NaOH (12.4 mL) was added. The resulting mixture was stirred for 20 min, and then the methanol was removed by rotary evaporation. Water was added until the aqueous solution was homogeneous, and then the aqueous solution was washed with  $\text{CH}_2\text{Cl}_2$  ( $2 \times 50$  mL). The aqueous layer was made acidic with 1 N HCl, which resulted in the formation of a white precipitate, which was filtered, washed with several portions of water, and dried with a flow of air through a filter.

A solution of DCC (2.06 g, 10 mmol) in  $\text{CH}_2\text{Cl}_2$  (10 mL) was added by cannula to a 0 °C slurry of substrate (10 mmol) in  $\text{CH}_2\text{Cl}_2$  (60 mL). The resulting slurry was allowed to warm to room temperature overnight. The white precipitate was then removed by filtration, and the  $\text{CH}_2\text{Cl}_2$  solution was washed with saturated  $\text{NaHCO}_3$  ( $2 \times 50$  mL), followed by saturated NaCl (50 mL). The  $\text{CH}_2\text{Cl}_2$  layer was dried with  $\text{MgSO}_4$ , and the  $\text{CH}_2\text{Cl}_2$  was removed by rotary evaporation.

**General Procedure 5: Synthesis of 3-monosubstituted oxindoles**

The 3-monosubstituted oxindoles were synthesized by the reported methods.<sup>4</sup>

**General Procedure 6: Synthesis of dihydropyrazol-5-ones<sup>5</sup>**

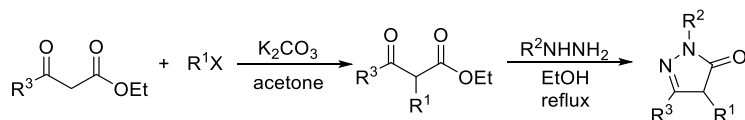

According a published procedure<sup>5</sup>, a mixture of acetoacetate (1.0 equiv.) and anhydrous K<sub>2</sub>CO<sub>3</sub> (1.3 equiv.) in dry acetone (1.0 M) was stirred under argon atmosphere for five minutes. Then, corresponding halide (1.3 equiv.) was added carefully. The reaction was refluxed overnight. After filtration, the solvent was evaporated. The crude mixture purified by flash chromatography on silica gel with mixture of hexane/ethyl acetate (20:1) affording corresponding pure  $\alpha$ -substituted acetoacetate. Then, a mixture of  $\alpha$ -substituted acetoacetate (1.0 equiv.) and hydrazine (1.1 equiv.) was refluxed in EtOH (1.0 M) until full conversion. The solvent was removed a residue was crystalized from Et<sub>2</sub>O to give the corresponding dihydropyrazol-5-ones.

**General Procedure 7:** *Asymmetric Michael Addition of oxazol-4(5H)-ones, thiazol-4(5H)-one, oxazol-5-one and dihydropyrazol-5-ones, with 4-nitrophenyl (E)-4,4,4-trifluorobut-2-enoate*

Under N<sub>2</sub>, dihydropyrazol-5-ones (0.2 mmol), 4-nitrophenyl (E)-4,4,4-trifluorobut-2-enoate (0.2 mmol) and (2*S*,3*R*)-HyperBTM (20 mol%) in THF were allowed to stir for 6–72 h at 0 °C or room temperature. Alternatively, benzylamine (1.0 mmol) was added and allowed to stir for a further 16 h at room temperature. Then, 30 mL Et<sub>2</sub>O was added, the mixture was washed with 1N NaOH aq (3 × 30 mL) and 1N HCl aq (30 mL). After dried by MgSO<sub>4</sub>, the mixture was concentrated *in vacuo*, and the residue purified by column chromatography using a mixture of petroleum ether and EtOAc as eluent.

**General Procedure 8:** *Unasymmetric Michael Addition of dihydropyrazol-5-ones with 4-nitrophenyl (E)-4,4,4-trifluorobut-2-enoate*

Under N<sub>2</sub>, dihydropyrazol-5-ones (0.1 mmol), 4-nitrophenyl (E)-4,4,4-trifluorobut-2-enoate (0.1 mmol) and *rac*-HyperBTM (20 mol%) in THF were allowed to stir for 6–72 h at 0 °C or room temperature. Then, benzylamine (0.5 mmol) was added and allowed to stir for a further 16 h at room temperature. Then, 15 mL Et<sub>2</sub>O was added, the mixture was washed with 1N NaOH aqueous solution (3 × 15 mL) and 1N HCl aq (15 mL). After dried by MgSO<sub>4</sub>, the mixture was concentrated *in vacuo*, and the residue purified by column chromatography using a mixture of petroleum ether and EtOAc as eluent.

**General Procedure 9:** *Asymmetric Michael Addition of pyrrolidinone and 3-monosubstituted oxindoles with  $\alpha,\beta$ -unsaturated aryl esters*

The *N*-heterocycle **1** (0.2 mmol), activated 4-nitrophenol ester **2** (0.2 mmol), (2*S*,3*R*)-HyperBTM (10 mol%) and *i*PrNEt<sub>2</sub> (35.0  $\mu$ L) in anhydrous THF (2.0 mL) was allowed to stir for 24–72 h at rt. For isolation of the PNP ester product, the reaction may be concentrated and purified by column chromatography. Alternatively, an appropriate amine (5.0 equiv.) may be added and allowed to stir for a further 16 h at room temperature. The crude mixture was then concentrated *in vacuo*, and the residue purified by column chromatography using a mixture of petroleum ether and ethyl acetate as eluent.

**General Procedure 10:** *Unasymmetric Michael Addition of 3-monosubstituted oxindoles with  $\alpha,\beta$ -unsaturated aryl esters*

The *N*-heterocycle **1** (0.2 mmol), activated 4-nitrophenol ester **2** (0.2 mmol), *rac*-HyperBTM (10 mol%) and *i*PrNEt<sub>2</sub> (35.0  $\mu$ L) in anhydrous THF (2.0 mL) was allowed to stir for 24–72 h at rt. For isolation of the PNP ester product, the reaction may be concentrated and purified by column chromatography. Alternatively, an appropriate amine (5.0 equiv.) may be added and allowed to stir for a further 16 h at room temperature. The crude mixture was then concentrated *in vacuo*, and the residue purified by column chromatography using a mixture of petroleum ether and ethyl acetate as eluent.

**General Procedure 11:** Grams-scale preparation of **55**

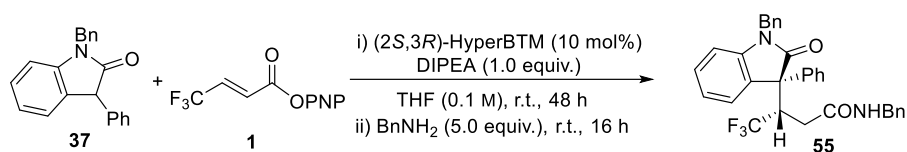

1-benzyl-3-phenylindolin-2-one **36** (1.20 g, 4.0 mmol), 4-nitrophenyl (*E*)-4,4,4-trifluorobut-2-enoate **1** (1.04 g, 4.0 mmol), (2*S*,3*R*)-HyperBTM (61.7 mg, 2.0 mmol) and DIPEA (0.7 mL, 4.0 mmol) in anhydrous THF (20.0 mL) at rt for 48 h. Benzyl amine (2.2 mL, 20.0 mmol) was added and the reaction was stirred at room temperature overnight. The yellow reaction mixture was diluted in diethyl ether (50 mL) and then washed with 1 N NaOH aqueous solution (50 mL×3) and 1 N HCl aqueous solution (100 mL). The organic layers were washed with brine, dried over MgSO<sub>4</sub> and concentrated under reduced pressure. The residue was purified by flash column chromatography (6:1 Petrol : EtOAc, R<sub>f</sub> 0.13) to get **55** as a white solid (1.61 g, 76% yield).

### 3 Preparation of Starting Materials

#### 3.1 Data for $\alpha,\beta$ -unsaturated aryl esters

##### 4-Nitrophenyl (*E*)-4,4,4-trifluorobut-2-enoate (1)

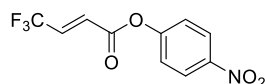

**$^1\text{H NMR}$  (400 MHz,  $\text{CDCl}_3$ )**  $\delta_{\text{H}}$ : 6.72–6.77 (1H, m,  $\text{F}_3\text{CCH}=\text{CH}$ ), 7.00–7.09 (1H, m,  $\text{F}_3\text{CCH}=\text{CH}$ ), 7.37–7.40 (2H, m,  $\text{ArC}(2,6)\text{H}$ ), 8.31–8.35 (2H, m,  $\text{ArC}(3,5)\text{H}$ );  **$^{19}\text{F NMR}$  (376 MHz,  $\text{CDCl}_3$ )**  $\delta_{\text{F}}$ : –65.76 ( $\text{CF}_2\text{H}$ );  **$^{13}\text{C NMR}$  (101 MHz,  $\text{CDCl}_3$ )**  $\delta_{\text{C}}$ : 120.9 (q,  $J$  269.0,  $\text{CF}_3$ ), 122.2 ( $2\times\text{ArCH}$ ), 125.4 ( $2\times\text{ArCH}$ ), 127.4 (q,  $J$  6.1,  $\text{F}_3\text{CCH}=\text{CH}$ ), 134.1 (q,  $J$  35.8,  $\text{F}_3\text{CCH}=\text{CH}$ ), 145.8 ( $\text{ArCH}$ ), 154.6 ( $\text{ArCH}$ ), 161.4 ( $\text{CO}_2\text{Ar}$ ).

##### 4-Nitrophenyl (*E*)-4,4-difluorobut-2-enoate (70)

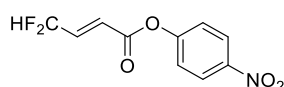

**$^1\text{H NMR}$  (400 MHz,  $\text{CDCl}_3$ )**  $\delta_{\text{H}}$ : 6.22–6.50 (1H, m,  $\text{CF}_2\text{H}$ ), 6.52–6.57 (1H, m,  $\text{F}_2\text{HCCH}=\text{CH}$ ), 7.03–7.14 (1H, m,  $\text{F}_2\text{HCCH}=\text{CH}$ ), 7.36–7.40 (2H, m,  $\text{ArC}(2,6)\text{H}$ ), 8.31–8.35 (2H, m,  $\text{ArC}(3,5)\text{H}$ );  **$^{19}\text{F NMR}$  (376 MHz,  $\text{CDCl}_3$ )**  $\delta_{\text{F}}$ : –116.9 ( $\text{CF}_2\text{H}$ );  **$^{13}\text{C NMR}$  (101 MHz,  $\text{CDCl}_3$ )**  $\delta_{\text{C}}$ : 111.9 (t,  $J$  236.7,  $\text{CF}_2\text{H}$ ), 122.3 ( $2\times\text{ArCH}$ ), 125.4 ( $2\times\text{ArCH}$ ), 125.7 (t,  $J$  10.3,  $\text{HF}_2\text{CCH}=\text{CH}$ ), 139.5 (t,  $J$  24.0,  $\text{HF}_2\text{CCH}=\text{CH}$ ), 145.7 ( $\text{ArCH}$ ), 154.8 ( $\text{ArCH}$ ), 162.1 ( $\text{CO}_2\text{Ar}$ ).

##### 4-Nitrophenyl (*E*)-4-chloro-4,4-difluorobut-2-enoate (71)

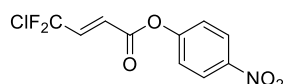

**$^1\text{H NMR}$  (400 MHz,  $\text{CDCl}_3$ )**  $\delta_{\text{H}}$ : 6.63 (1H, dt,  $J$  15.6, 1.8,  $\text{F}_2\text{ClCCH}=\text{CH}$ ), 7.18 (1H, dt,  $J$  15.6, 9.0,  $\text{F}_2\text{ClCCH}=\text{CH}$ ), 7.37–7.41 (2H, m,  $\text{ArC}(2,6)\text{H}$ ), 8.32–8.36 (2H, m,  $\text{ArC}(3,5)\text{H}$ );  **$^{19}\text{F NMR}$  (376 MHz,  $\text{CDCl}_3$ )**  $\delta_{\text{F}}$ : –54.5 ( $\text{CF}_2\text{Cl}$ );  **$^{13}\text{C NMR}$  (101 MHz,  $\text{CDCl}_3$ )**  $\delta_{\text{C}}$ : 122.3 ( $2\times\text{ArCH}$ ), 123.1 (t,  $J$  287.9,  $\text{F}_2\text{ClC}$ ), 124.0 (t,  $J$  6.5,  $\text{F}_2\text{ClCCH}=\text{CH}$ ), 125.4 ( $2\times\text{ArCH}$ ), 139.5 (t,  $J$  = 29.1 Hz,  $\text{F}_2\text{ClCCH}=\text{CH}$ ), 145.8 ( $\text{ArCH}$ ), 154.6 ( $\text{ArCH}$ ), 161.7 ( $\text{CO}_2\text{Ar}$ ).

##### 4-Nitrophenyl (*E*)-4-bromo-4,4-difluorobut-2-enoate (72)

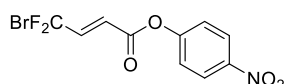

**$^1\text{H NMR}$  (400 MHz,  $\text{CDCl}_3$ )**  $\delta_{\text{H}}$ : 6.54 (1H, dt,  $J$  15.6, 1.7,  $\text{F}_2\text{BrCCH}=\text{CH}$ ), 7.24 (1H, dt,  $J$  15.6, 9.9,  $\text{F}_2\text{BrCCH}=\text{CH}$ ), 7.37–7.41 (2H, m,  $\text{ArC}(2,6)\text{H}$ ), 8.31–8.35 (2H, m,  $\text{ArC}(3,5)\text{H}$ );  **$^{19}\text{F NMR}$  (376 MHz,  $\text{CDCl}_3$ )**  $\delta_{\text{F}}$ : –50.6 ( $\text{CF}_2\text{Br}$ );  **$^{13}\text{C NMR}$  (101 MHz,  $\text{CDCl}_3$ )**  $\delta_{\text{C}}$ : 114.6 (t,  $J$  301.8,  $\text{F}_2\text{BrC}$ ), 122.3 ( $2\times\text{ArCH}$ ), 122.6 (t,  $J$  6.8,  $\text{F}_2\text{BrCCH}=\text{CH}$ ), 125.4 ( $2\times\text{ArCH}$ ), 141.0 (t,  $J$  25.9,  $\text{F}_2\text{BrCCH}=\text{CH}$ ), 145.7 ( $\text{ArCH}$ ), 154.7 ( $\text{ArCH}$ ), 161.7 ( $\text{CO}_2\text{Ar}$ ).



#### 4-nitrophenyl (*E*)-but-2-enoate (73)

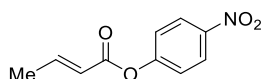

$^1\text{H NMR}$  (500 MHz,  $\text{CDCl}_3$ )  $\delta_{\text{H}}$ : 2.01 (3H, dd,  $J$  6.9, 1.7, CH<sub>3</sub>), 6.03–6.08 (1H, m, CH=CH–CO<sub>2</sub>PNP), 7.21–7.28 (1H, m, CH=CHCO<sub>2</sub>PNP), 7.29–7.31 (2H, m, CH–Ar<sub>PNP</sub>), 8.26–8.29 (2H, m, CH–Ar<sub>PNP</sub>).

#### 4-Nitrophenyl cinnamate (74)

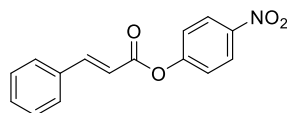

$^1\text{H NMR}$  (400 MHz,  $\text{CDCl}_3$ )  $\delta_{\text{H}}$ : 6.63 (1H, d,  $J$  16.0, CH=CH–CO<sub>2</sub>PNP), 7.37–7.39 (2H, m, CH–Ar<sub>PNP</sub>), 7.44–7.47 (3H, m, CH–Ph), 7.60–7.62 (2H, m, CHPh), 7.92 (1H, d,  $J$  16.0, CH=CH–CO<sub>2</sub>PNP), 8.30–8.32 (2H, m, CH–Ar<sub>PNP</sub>).

#### 4-Nitrophenyl (*E*)-3-(*p*-tolyl)acrylate (S1)

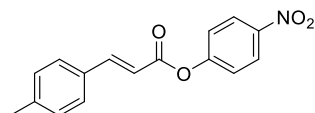

White solid. mp: 109–110°C;  $\nu_{\text{max}}$  (film), 1736 (C=O);  $^1\text{H NMR}$  (400 MHz,  $\text{CDCl}_3$ )  $\delta_{\text{H}}$ : 6.79 (1H, d,  $J$  16.0, CH=CH–CO<sub>2</sub>PNP), 7.40–7.42 (2H, m, CH–Ar), 7.78–7.80 (2H, m, CH–Ar), 7.79 (1H, d,  $J$  16.0, CH=CH–CO<sub>2</sub>PNP), 8.32–8.36 (4H, m, CH–Ar);  $^{13}\text{C NMR}$  (101 MHz,  $\text{CDCl}_3$ )  $\delta_{\text{C}}$ : 120.5 (CH=CH–CO<sub>2</sub>PNP), 122.4 (2×CH–Ar), 124.4 (2×CH–Ar), 125.4 (2×CH–Ar), 129.1 (2×CH–Ar), 139.7 (CH–Ar), 144.9 (CH=CH–CO<sub>2</sub>PNP), 145.5 (CH–Ar), 149.0 (CH–Ar), 155.2 (CH–Ar), 163.5 (C=O); **HRMS (NSI<sup>+</sup>)** exact mass calcd. For C<sub>16</sub>H<sub>13</sub>NNaO<sub>4</sub><sup>+</sup> (M+Na<sup>+</sup>) requires  $m/z$  306.0737, found  $m/z$  306.0734 (–0.91 ppm).

#### 4-Nitrophenyl (*E*)-3-(4-nitrophenyl)acrylate (S2)

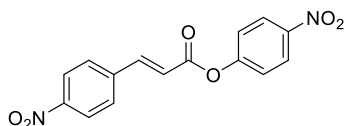

White solid. mp: 189–190°C;  $\nu_{\text{max}}$  (film), 1736 (C=O);  $^1\text{H NMR}$  (400 MHz,  $\text{CDCl}_3$ )  $\delta_{\text{H}}$ : 2.43 (3H, s), 6.60 (1H, d,  $J$  16.0, CH=CH–CO<sub>2</sub>PNP), 7.25–7.28 (2H, m, CH–Ar), 7.38–7.40 (2H, m, CH–Ar), 7.52–7.54 (2H, m, CH–Ar), 7.91 (1H, d,  $J$  16.0, CH=CH–CO<sub>2</sub>PNP), 8.31–8.33 (2H, m, CH–Ar);  $^{13}\text{C NMR}$  (101 MHz,  $\text{CDCl}_3$ )  $\delta_{\text{C}}$ : 21.6 (CH<sub>3</sub>), 115.0 (CH=CH–CO<sub>2</sub>PNP), 122.5 (2×CH–Ar), 125.2 (2×CH–Ar), 128.5 (2×CH–Ar), 129.9 (2×CH–Ar), 131.1 (CH–Ar), 141.9 (CH–Ar), 145.2 (CH–Ar), 148.1 (CH=CH–CO<sub>2</sub>PNP), 155.7 (CH–Ar), 164.6 (C=O); **HRMS (NSI<sup>+</sup>)** exact mass calcd. For C<sub>15</sub>H<sub>10</sub>N<sub>2</sub>NaO<sub>6</sub><sup>+</sup> (M+Na<sup>+</sup>) requires  $m/z$  337.0431, found  $m/z$  337.0428 (–0.91 ppm).

#### Ethyl (4-nitrophenyl) fumarate (75)

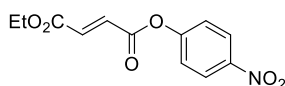

**<sup>1</sup>H NMR (400 MHz, CDCl<sub>3</sub>)** δ<sub>H</sub>: 1.36 (3H, t, *J* 7.1, CH<sub>2</sub>CH<sub>3</sub>), 4.32 (2H, q, *J* 7.1, CH<sub>2</sub>CH<sub>3</sub>), 7.04 (1H, d, *J* 15.8, CH=CHCO<sub>2</sub>Ar), 7.09 (1H, d, *J* 15.8, CH=CHCO<sub>2</sub>Ar), 7.31–7.43 (2H, m, CH-Ar), 8.10–8.13 (2H, m, CH-Ar).

### 3.2 Data for oxazol-4(5H)-one

#### 5-Methyl-2-phenyloxazol-4(5H)-one (2)

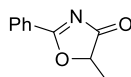

Following General Procedure 2, the title compound was afforded as a white solid (1.65 g, 42% yield); **<sup>1</sup>H NMR (400 MHz, CDCl<sub>3</sub>)** δ<sub>H</sub>: 1.49 (3H, d, *J* 7.2, CH<sub>3</sub>), 4.14 (1H, q, *J* 7.2, CH<sub>3</sub>CH), 7.48–7.51 (2H, m, CHPh), 7.61–7.63 (1H, m, CHPh), 8.04–8.06 (2H, m, CHPh).

### 3.3 Data for thiazol-4(5H)-one

#### 5-Methyl-2-phenylthiazol-4(5H)-one (3)

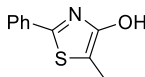

Following General Procedure 3, the title compound was afforded as a yellow solid (0.42g, 37% yield); **<sup>1</sup>H NMR (400 MHz, CDCl<sub>3</sub>)** δ<sub>H</sub>: 2.20 (3H, s, CH<sub>3</sub>), 7.42–7.46 (3H, m, CHPh), 7.83–7.85 (2H, m, CHPh), 10.30 (1H, s, OH).

### 3.4 Data for oxazol-5(4H)-ones

#### 4-Methyl-2-phenyloxazol-5(4H)-one (4)

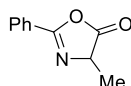

Following General Procedure 4, the title compound was afforded from *N*-benzoyl-D,L-alanine (1.93 g, 10.0 mmol, ) as a white solid (1.40 g, 80%); **<sup>1</sup>H NMR (400 MHz, CDCl<sub>3</sub>)** δ<sub>H</sub>: 1.62 (3H, d, *J* 7.6, CH<sub>3</sub>), 4.48 (1H, q, *J* 7.6, CH<sub>3</sub>CH), 7.49–7.54 (2H, m, CHPh), 7.59–7.63 (1H, m, CHPh), 8.01–8.04 (2H, m, CHPh).

#### 2,4-Diphenyloxazol-5-(4H)-one (5)

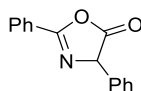

Following General Procedure 4, the title compound was afforded from *N*-benzoyl-D,L-phenylglycine (2.55 g, 10.0 mmol, ) as a yellow solid (1.21 g, 51%); **<sup>1</sup>H NMR (400 MHz, CDCl<sub>3</sub>)** δ<sub>H</sub>: 5.32 (1H, s, CH), 7.44–7.60 (5H, m, CHPh), 7.63–7.66 (3H, m, CHPh), 7.89–7.91 (2H, m, CHPh).

### 3.5 Data for 3-monosubstituted oxindoles

#### 1-Benzyl-3-phenylpyrrolidin-2-one (6)

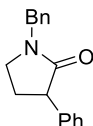

<sup>1</sup>HNMR (CDCl<sub>3</sub>, 400 MHz) δ<sub>H</sub>: 2.08–2.18 (1H, m, CH<sub>2</sub>(pyrr)), 2.48–2.56 (1H, m, CH<sub>2</sub>(pyrr)), 3.30–3.41 (2H, m, CH<sub>2</sub>(pyrr)), 3.76 (1H, t, *J* 8.8, PhCH<sub>2</sub>(pyrr)), 4.50 (1H, d, *J* 14.6, NCH<sub>2</sub>Ph), 4.63 (1H, d, *J* 14.6, NCH<sub>2</sub>Ph), 7.27–7.40 (10H, m, Ar-CH).

**1,3-Dibenzylindolin-2-one (7)**

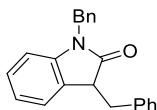

<sup>1</sup>HNMR (CDCl<sub>3</sub>, 400 MHz) δ<sub>H</sub>: 3.17 (1H, dd, *J* 13.6, 8.1, CH<sub>2</sub>Ph), 3.54 (1H, dd, *J* 13.6, 8.1, CH<sub>2</sub>Ph), 3.89 (1H, q, *J* 4.3, C(3)H), 4.67 (1H, d, *J* 1.6, CH<sub>2</sub>Ph), 5.07 (1H, d, *J* 1.6, CH<sub>2</sub>Ph), 6.58 (1H, d, *J* 7.8, Ar-CH), 6.95–7.01 (4H, m, Ar-CH), 7.10–7.20 (4H, m, Ar-CH), 7.23–7.27 (5H, m, Ar-CH).

**tert-Butyl 2-oxo-3-phenylindoline-1-carboxylate (9)**

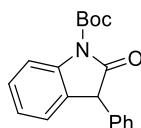

<sup>1</sup>HNMR (CDCl<sub>3</sub>, 400 MHz): δ 1.66 (9 H, s, (CH<sub>3</sub>)<sub>3</sub>), 4.76 (1 H, s, C(3)H), 7.18–7.24 (4 H, m, Ar-CH), 7.31–7.42 (4 H, m, Ar-CH), 7.96 (1 H, d, *J* 8.2, Ar-CH).

**1-Methyl-3-phenylindolin-2-one (36)**

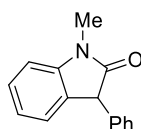

<sup>1</sup>HNMR (CDCl<sub>3</sub>, 400 MHz): δ 3.28 (3 H, s, CH<sub>3</sub>), 4.64 (1 H, s, C(3)H), 6.93 (1 H, d, *J* 7.8, Ar-CH), 7.07–7.11 (1 H, m, Ar-CH), 7.19–7.24 (3 H, m, Ar-CH), 7.29–7.39 (4 H, m, Ar-CH).

**1-Benzyl-3-phenylindolin-2-one (37)**

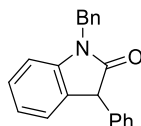

<sup>1</sup>HNMR (CDCl<sub>3</sub>, 400 MHz) δ<sub>H</sub>: 4.75 (1H, s, C(3)H), 4.94 (1H, d, *J* 15.6, CH<sub>2</sub>Ph), 5.04 (1H, d, *J* 15.6, CH<sub>2</sub>Ph), 6.83 (1H, d, *J* 7.8, Ar-CH), 7.04–7.08 (1H, m, Ar-CH), 7.19–7.41 (12H, m, Ar-CH).

**1-Benzyl-5-methoxy-3-phenylindolin-2-one (38)**

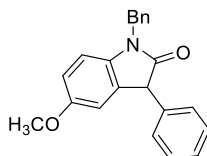

$^1\text{H NMR}$  ( $\text{CDCl}_3$ , 400 MHz)  $\delta_{\text{H}}$ : 3.74 (3H, s,  $\text{OCH}_3$ ), 4.72 (1H, s,  $\text{C}(3)\text{H}$ ), 4.91 (1H, d,  $J$  15.6,  $\text{CH}_2\text{Ph}$ ), 5.00 (1H, d,  $J$  15.6,  $\text{CH}_2\text{Ph}$ ), 6.70 (1H, d,  $J$  8.5, Ar-CH), 6.75–6.78 (1H, m, Ar-CH), 6.81 (1H, dd,  $J$  2.2, 0.8, Ar-CH), 7.25–7.41 (10H, m, Ar-CH).

**1-Benzyl-5-chloro-3-phenylindolin-2-one (39)**

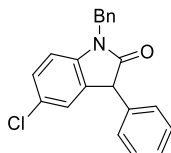

$^1\text{H NMR}$  ( $\text{CDCl}_3$ , 400 MHz)  $\delta_{\text{H}}$ : 4.72 (1H, s,  $\text{C}(3)\text{H}$ ), 4.91 (1H, d,  $J$  15.6,  $\text{CH}_2\text{Ph}$ ), 5.01 (1H, d,  $J$  15.6,  $\text{CH}_2\text{Ph}$ ), 6.72 (1H, d,  $J$  8.3, Ar-CH), 7.16–7.24 (4H, m, Ar-CH), 7.29–7.42 (8H, m, Ar-CH).

**1-Benzyl-6-chloro-3-phenylindolin-2-one (40)**

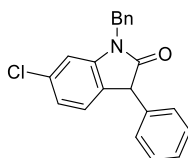

$^1\text{H NMR}$  ( $\text{CDCl}_3$ , 400 MHz)  $\delta_{\text{H}}$ : 4.70 (1H, s,  $\text{C}(3)\text{H}$ ), 4.90 (1H, d,  $J$  15.6,  $\text{CH}_2\text{Ph}$ ), 5.00 (1H, d,  $J$  15.6,  $\text{CH}_2\text{Ph}$ ), 6.81 (1H, d,  $J$  1.5, Ar-CH), 7.03 (1H, dd,  $J$  7.9, 1.0, Ar-CH), 7.10 (1H, dd,  $J$  7.9, 1.0, Ar-CH), 7.22–7.24 (2H, m, Ar-CH), 7.32–7.41 (8H, m, Ar-CH).

**1-Benzyl-7-chloro-3-phenylindolin-2-one (41)**

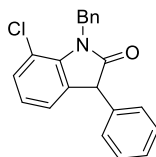

$^1\text{H NMR}$  ( $\text{CDCl}_3$ , 400 MHz)  $\delta_{\text{H}}$ : 4.75 (1H, s,  $\text{C}(3)\text{H}$ ), 5.39 (1H, d,  $J$  15.6,  $\text{CH}_2\text{Ph}$ ), 5.46 (1H, d,  $J$  15.6,  $\text{CH}_2\text{Ph}$ ), 6.97–7.01 (1H, m, Ar-CH), 7.08–7.10 (1H, m, Ar-CH), 7.21–7.24 (3H, m, Ar-CH), 7.27–7.41 (8H, m, Ar-CH).

**1-Benzyl-3-(4-methoxyphenyl)indolin-2-one (42)**

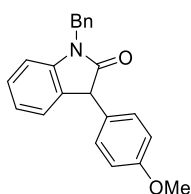

$^1\text{H NMR}$  ( $\text{CDCl}_3$ , 400 MHz)  $\delta_{\text{H}}$ : 3.83 (3H, s,  $\text{OCH}_3$ ), 4.69 (1H, s,  $\text{C}(3)\text{H}$ ), 4.92 (1H, d,  $J$  15.6,  $\text{CH}_2\text{Ph}$ ), 5.02 (1H, d,  $J$  15.6,  $\text{CH}_2\text{Ph}$ ), 6.81 (1H, d,  $J$  7.8, Ar-CH), 6.90–6.93 (2H, m, Ar-CH), 7.03–7.07 (1H, m,

Ar-CH), 7.16–7.35 (9H, m, Ar-CH).

**3-(Benzo[d][1,3]dioxol-5-yl)-1-benzylindolin-2-one (43)**

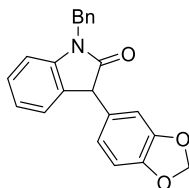

<sup>1</sup>HNMR (CDCl<sub>3</sub>, 400 MHz) δ<sub>H</sub>: 4.64 (1H, s, C(3)H), 4.92 (1H, d, *J* 15.6, CH<sub>2</sub>Ph), 5.01 (1H, d, *J* 15.6, CH<sub>2</sub>Ph), 5.96 (2H, dd, *J* 3.1, 1.4, OCH<sub>2</sub>O), 6.67 (1H, d, *J* 1.7, Ar-CH), 6.76 (1H, dd, *J* 8.0, 1.7, Ar-CH), 6.80–6.83 (2H, m, Ar-CH), 7.03–7.07 (1H, m, Ar-CH), 7.18–7.25 (2H, m, Ar-CH), 7.28–7.37 (5H, m, Ar-CH).

**1-Benzyl-3-(naphthalen-2-yl)indolin-2-one (44)**

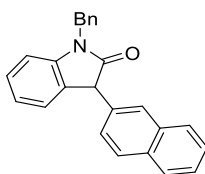

<sup>1</sup>HNMR (CDCl<sub>3</sub>, 400 MHz) δ<sub>H</sub>: 4.91 (1H, s, C(3)H), 4.96 (1H, d, *J* 15.7, CH<sub>2</sub>Ph), 5.08 (1H, d, *J* 15.7, CH<sub>2</sub>Ph), 6.87 (1H, d, *J* 7.8, Ar-CH), 7.05–7.09 (1H, m, Ar-CH), 7.21–7.41 (8H, m, Ar-CH), 7.49–7.53 (2H, m, Ar-CH), 7.78 (1H, m, Ar-CH), 7.82–7.87 (3H, m, Ar-CH).

**1-Benzyl-3-(4-(trifluoromethyl)phenyl)indolin-2-one (45)**

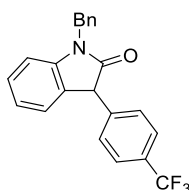

<sup>1</sup>HNMR (CDCl<sub>3</sub>, 400 MHz) δ<sub>H</sub>: 4.80 (1H, s, C(3)H), 4.93 (1H, d, *J* 15.7, CH<sub>2</sub>Ph), 5.03 (1H, d, *J* 15.7, CH<sub>2</sub>Ph), 6.86 (1H, d, *J* 8.0, Ar-CH), 7.06–7.10 (1H, m, Ar-CH), 7.17–7.19 (1H, m, Ar-CH), 7.25–7.40 (8H, m, Ar-CH), 7.65 (2H, d, *J* 8.0, Ar-CH).

**1-Benzyl-3-(4-fluorophenyl)indolin-2-one (46)**

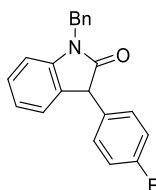

<sup>1</sup>HNMR (CDCl<sub>3</sub>, 400 MHz) δ<sub>H</sub>: 4.72 (1H, s, C(3)H), 4.93 (1H, d, *J* 15.6, CH<sub>2</sub>Ph), 5.02 (1H, d, *J* 15.6 ,

$CH_2Ph$ ), 6.83 (1H, d,  $J$  7.8, Ar-CH), 7.05–7.10 (3H, m, Ar-CH), 7.18–7.38 (9H, m, Ar-CH);  $^{19}F\{^1H\}$  NMR (376 MHz,  $CDCl_3$ )  $\delta_F$ : -114.8.

**1-Benzyl-3-(3-fluorophenyl)indolin-2-one (47)**

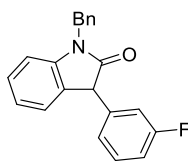

$^1H$ NMR ( $CDCl_3$ , 400 MHz)  $\delta_H$ : 4.73 (1H, s, C(3)H), 4.94 (1H, d,  $J$  15.6,  $CH_2Ph$ ), 5.02 (1H, d,  $J$  15.6,  $CH_2Ph$ ), 6.84 (1H, d,  $J$  7.8, Ar-CH), 6.94–6.97 (1H, m, Ar-CH), 7.00–7.10 (3H, m, Ar-CH), 7.19–7.38 (8 H, m, Ar-CH);  $^{19}F\{^1H\}$  NMR (376 MHz,  $CDCl_3$ )  $\delta_F$ : -112.4.

**1-Benzyl-3-(3-methoxyphenyl)indolin-2-one (48)**

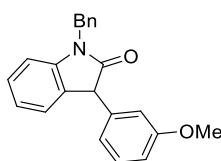

$^1H$ NMR ( $CDCl_3$ , 400 MHz)  $\delta_H$ : 3.81 (3H, s,  $OCH_3$ ), 4.72 (1H, s, C(3)H), 4.93 (1H, d,  $J$  15.6,  $CH_2Ph$ ), 5.04 (1H, d,  $J$  15.6,  $CH_2Ph$ ), 6.80–6.90 (4H, m, Ar-CH), 7.03–7.07 (1H, m, Ar-CH), 7.20–7.38 (8H, m, Ar-CH).

**1-Benzyl-3-(thiophen-2-yl)indolin-2-one (49)**

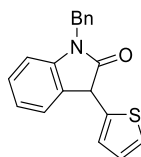

$^1H$ NMR ( $CDCl_3$ , 400 MHz)  $\delta_H$ : 4.93 (1H, d,  $J$  15.6,  $CH_2Ph$ ), 5.00 (1H, s, C(3)H), 5.02 (1H, d,  $J$  15.7,  $CH_2Ph$ ), 6.81 (1H, d,  $J$  7.8, Ar-CH), 7.04 (1H, dd,  $J$  5.1, 3.5, Ar-CH), 7.07–7.11 (2H, m, Ar-CH), 7.24–7.39 (8H, m, Ar-CH).

**1-Benzyl-3-(2-methoxyphenyl)indolin-2-one (50)**

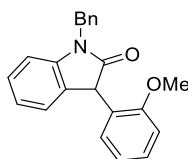

$^1H$ NMR ( $CDCl_3$ , 400 MHz)  $\delta_H$ : 3.66 (3H, s,  $OCH_3$ ), 4.91 (1H, d,  $J$  15.6,  $CH_2Ph$ ), 4.95 (1H, s, C(3)H), 5.15 (1H, d,  $J$  15.6,  $CH_2Ph$ ), 6.80 (1H, d,  $J$  7.8, Ar-CH), 6.92–7.00 (3H, m, Ar-CH), 7.07 (1H, d,  $J$  7.4, Ar-CH), 7.16–7.21 (2H, m, Ar-CH), 7.28–7.39 (4H, m, Ar-CH), 7.43–7.45 (2H, m, Ar-CH).

**1-Benzyl-3-(2-fluorophenyl)indolin-2-one (51)**

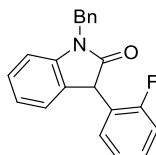

$^1\text{H NMR}$  ( $\text{CDCl}_3$ , 400 MHz)  $\delta_{\text{H}}$ : 4.96 (1H, d,  $J$  15.7,  $\text{CH}_2\text{Ph}$ ), 4.99 (1H, s, C(3) $H$ ), 5.11 (1H, d,  $J$  15.7,  $\text{CH}_2\text{Ph}$ ), 6.81 (1H, d,  $J$  7.8, Ar- $CH$ ), 7.00–7.04 (1H, m, Ar- $CH$ ), 7.13–7.24 (5H, m, Ar- $CH$ ), 7.28–7.41 (6H, m, Ar- $CH$ );  $^{19}\text{F}\{^1\text{H}\}$  NMR (376 MHz,  $\text{CDCl}_3$ )  $\delta_{\text{F}}$ : –116.8.

### 1-Benzyl-3-(4-(dimethylamino)phenyl)indolin-2-one (52)

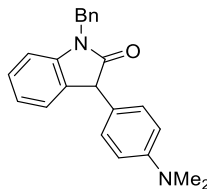

$^1\text{H NMR}$  ( $\text{CDCl}_3$ , 400 MHz)  $\delta_{\text{H}}$ : 2.96 (6H, s,  $\text{N}(\text{CH}_3)_2$ ), 4.65 (1H, s, C(3) $H$ ), 4.92 (1H, d,  $J$  15.7,  $\text{CH}_2\text{Ph}$ ), 5.03 (1H, d,  $J$  15.7,  $\text{CH}_2\text{Ph}$ ), 6.74–6.81 (3H, m, Ar- $CH$ ), 7.02–7.06 (1H, m, Ar- $CH$ ), 7.10–7.14 (2H, m, Ar- $CH$ ), 7.20–7.22 (2H, m, Ar- $CH$ ), 7.28–7.37 (5H, m, Ar- $CH$ ).

### 3.6 Data for dihydropyrazol-5-ones

#### 3,4-Dimethyl-1-phenyl-1,4-dihydro-5H-pyrazol-5-one (8)

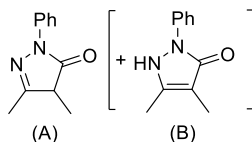

Following General Procedure 6, the mixture of ethyl 2-methyl-3-oxobutanoate (3.60 g, 25.0 mmol), phenylhydrazine (2.97 g, 27.5 mmol) and EtOH (25 mL) were refluxed overnight to afford the title compound (3.09 g, 66% yield) as a pale-yellow solid;  $^1\text{H NMR}$  (400 MHz,  $\text{CDCl}_3$ , 1.6:1 A:B)  $\delta_{\text{H}}$ : 1.44 (A, 3H, s, C(4) $\text{CH}_3$ ), 1.70 (B, 3H, s, C(4) $\text{CH}_3$ ), 2.07 (B, 3H, s, C(3) $\text{CH}_3$ ), 2.17 (A, 3H, s, C(3) $\text{CH}_3$ ), 3.24 (A, 1H, q,  $J$  8.0,  $CH$ ), 7.08–7.13 (B, 1H, m, PhC(4) $H$ ), 7.17–7.21 (A, 1H, m, PhC(4) $H$ ), 7.25–7.29 (B, 2H, m, PhC(3,5) $H$ ), 7.38–7.43 (A, 2H, m, PhC(3,5) $H$ ), 7.56–7.59 (B, 2H, m, PhC(2,6) $H$ ), 7.87–7.91 (A, 2H, m, PhC(2,6) $H$ ).

#### 1,3,4-Trimethyl-1,4-dihydro-5H-pyrazol-5-one (14)

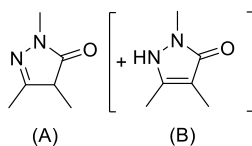

Following General Procedure 6, the mixture of ethyl 2-methyl-3-oxobutanoate (2.05 g, 14.2 mmol), methylhydrazine (0.72 g, 15.6 mmol) and EtOH (15 mL) were refluxed for 1 d to afford the title compound (1.14 g, 64% yield) as a white solid;  $^1\text{H NMR}$  (400 MHz,  $\text{CDCl}_3$ , 1:2.2 A:B)  $\delta_{\text{H}}$ : 1.34 (A, 3H, s, C(4) $\text{CH}_3$ ), 1.75 (B, 3H, s, C(4) $\text{CH}_3$ ), 2.06 (A, 3H, s, C(3) $\text{CH}_3$ ), 2.09 (B, 3H, s, C(3) $\text{CH}_3$ ), 2.99 (A, 1H, q,  $J$  8.0,  $CH$ ), 3.28 (A, 3H, s,  $\text{NCH}_3$ ), 3.38 (B, 3H, s,  $\text{NCH}_3$ ).

#### 3,4-Dimethyl-1-benzyl-1,4-dihydro-5H-pyrazol-5-one (15)

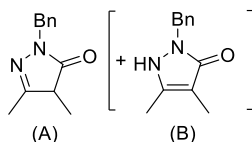

Following General Procedure 6, the mixture of ethyl 2-methyl-3-oxobutanoate (0.72 g, 5 mmol), benzylhydrazine (1.46 g, 5.5 mmol) and EtOH (5 mL) were refluxed for 1 d to afford the title compound (0.63 g, 62% yield) as a white solid.  $^1\text{H NMR}$  (400 MHz,  $\text{CDCl}_3$ , 1:1.2 A:B)  $\delta_{\text{H}}$ : 1.38 (A, 3H, d,  $J$  8.0, C(4) $\text{CH}_3$ ), 1.47 (B, 3H, s, C(4) $\text{CH}_3$ ), 2.08 (B, 3H, s, C(3) $\text{CH}_3$ ), 2.20 (A, 3H, s, C(3) $\text{CH}_3$ ), 3.06 (A, 1H, q,  $J$  7.9, CH), 4.75–4.88 (A, 2H, m,  $\text{CH}_2$  and B, 2H, m,  $\text{CH}_2$ ), 7.30–7.38 (A, 5H, m,  $\text{C}_6\text{H}_5$  and B, 5H, m,  $\text{C}_6\text{H}_5$ ).

### 3-Methyl-4-ethyl-1-phenyl-1,4-dihydro-5H-pyrazol-5-one (16)

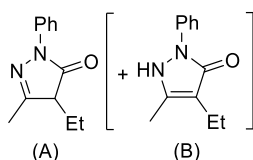

Following General Procedure 6, ethyl acetoacetate (2.86 g, 22.0 mmol), bromoethane (2.76g, 28.6 mmol), potassium carbonate (3.96 g, 28.6 mmol) and acetone (22 mL) afforded ethyl 2-ethyl-3-oxobutanoate (3.49 g, quant.) as a colourless liquid; Following General Procedure, the mixture of ethyl 2-ethyl-3-oxobutanoate (3.49 g, 37.0 mmol), phenylhydrazine (4.43 g, 41.0 mmol) and EtOH (37 mL) were refluxed for 1 d to afford the title compound (1.96 g, 26% yield) as an orange solid;  $^1\text{H NMR}$  (400 MHz,  $\text{CDCl}_3$ , 4.3:1 A:B)  $\delta_{\text{H}}$ : 0.83 (B, 3H, t,  $J$  7.6,  $\text{CH}_2\text{CH}_3$ ), 0.93 (A, 3H, t,  $J$  7.6,  $\text{CH}_2\text{CH}_3$ ), 1.84–2.14 (A, 2H, m,  $\text{CH}_2\text{CH}_3$  and B, 2H, m,  $\text{CH}_2\text{CH}_3$ ), 2.16 (B, 3H, s, C(3) $\text{CH}_3$ ), 2.18 (A, 3H, d,  $J$  0.7, C(3) $\text{CH}_3$ ), 3.27 (A, 1H, tq,  $J$  5.4, 0.8, CH), 7.17–7.22 (A, 1H, m, PhC(4) $H$  and B, 1H, m, PhC(4) $H$ ), 7.39–7.44 (A, 2H, m, PhC(3,5) $H$  and B, 2H, m, PhC(3,5) $H$ ), 7.87–7.92 (A, 2H, m, PhC(2,6) $H$  and B, 2H, m, PhC(2,6) $H$ ).

### 3-Methyl-4-allyl-1-phenyl-1,4-dihydro-5H-pyrazol-5-one (17)

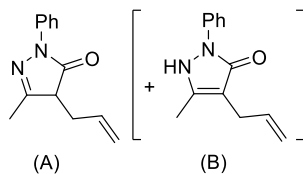

Following General Procedure 6, ethyl acetoacetate (2.60 g, 20.0 mmol), 3-bromoprop-1-ene (3.40 g, 26.0 mmol), potassium carbonate (3.60 g, 26.0 mmol) and acetone (20 mL) afforded ethyl 2-acetylpent-4-enoate (1.20 g, 30% yield) as a colourless liquid; Following General Procedure, the mixture of ethyl 2-acetylpent-4-enoate (0.85 g, 5.0 mmol), phenylhydrazine (0.59 g, 5.5 mmol) and EtOH (5 mL) were refluxed for 1 d to afford the title compound (0.72 g, 68% yield) as an orange oil;  $^1\text{H NMR}$  (400 MHz,  $\text{CDCl}_3$ , 5.5:1 A:B)  $\delta_{\text{H}}$ : 2.09 (A, 3H, s,  $\text{CH}_3$ ), 2.67–2.81 (A, 2H,  $\text{CH}_2$ ), 3.36 (A, 1H, t,  $J$  5.7, CH), 5.11–5.24 (A, 2H, m,  $\text{CH}=\text{CH}_2$ ), 5.64–5.74 (A, 1H,  $\text{CH}=\text{CH}_2$ ), 7.18–7.22 (A, 1H, m, PhC(4) $H$ ), 7.39–7.44 (A, 2H, m, PhC(3,5) $H$ ), 7.89–7.92 (A, 2H, m, PhC(2,6) $H$ ).

### 3-Methyl-4-benzyl-1-phenyl-1,4-dihydro-5H-pyrazol-5-one (18)



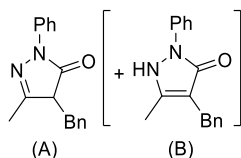

Following General Procedure **6**, ethyl 3-oxobutanoate (2.60 g, 20 mmol), benzyl bromide (4.45 g, 26 mmol), potassium carbonate (3.60 g, 26 mmol) and acetone (20 mL) afforded ethyl 2-benzyl-3-oxobutanoate (3.07 g, 70% yield) as a colourless liquid; Following General Procedure, the mixture of ethyl 2-benzyl-3-oxobutanoate (3.07 g, 14 mmol), phenylhydrazine (1.67 g, 15.4 mmol) and EtOH (14 mL) were refluxed overnight to afford the title compound (1.04 g, 28% yield) as a yellow solid; **<sup>1</sup>H NMR (400 MHz, CDCl<sub>3</sub>, 1:1.6 A:B)**  $\delta_{\text{H}}$ : 1.90 (B, 3H, s, C(3)CH<sub>3</sub>), 2.06 (A, 3H, s, C(3)CH<sub>3</sub>), 3.24 (A, 1H, dd, *J* 14.3, 6.9, CH<sup>A</sup>H<sup>B</sup>), 3.31 (A, 1H, dd, *J* 14.3, 6.9, CH<sup>A</sup>H<sup>B</sup>), 3.46 (B, 2H, s, CH<sub>2</sub>), 3.53–3.56 (A, 1H, m, CH), 7.03–7.07 (B, 1H, m, ArH), 7.11–7.31 (A, 6H, m, ArH and B, 7H, m, ArH), 7.36–7.41 (A, 2H, m, ArH), 7.48–7.51 (B, 2H, m, ArH), 7.78–7.81 (A, 2H, m, ArH).

#### 4-Benzyl-1,3-diphenyl-1,4-dihydro-5H-pyrazol-5-one (19)

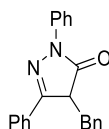

Following General Procedure **6**, ethyl 3-oxo-3-phenylpropanoate (3.84 g, 20 mmol), benzyl bromide (4.45 g, 26 mmol), potassium carbonate (3.60 g, 26 mmol) and acetone (20 mL) afforded ethyl 2-benzyl-3-oxo-3-phenylpropanoate (5.95 g, quant.) as a colourless liquid. Following General Procedure, the mixture of ethyl 2-benzyl-3-oxo-3-phenylpropanoate (5.95 g, 21.0 mmol), phenylhydrazine (2.50 g, 23.1 mmol) and EtOH (21 mL) were refluxed for 1 d to afford the title compound (1.61 g, 24 % yield) as a yellow solid; **<sup>1</sup>H NMR (400 MHz, CDCl<sub>3</sub>)**  $\delta_{\text{H}}$ : 3.38 (1H, dd, *J* 13.8, 5.5, CH<sup>A</sup>H<sup>B</sup>), 3.51 (1H, dd, *J* 13.8, 5.5, CH<sup>A</sup>H<sup>B</sup>), 4.14 (1H, dd, *J* 5.5, 4.8, CH), 6.92–6.94 (2H, m, C(4)PhC(2,6)H), 7.09–7.14 (3H, m, C(4)PhC(3,4,5)H), 7.18–7.22 (1H, m, N(1)PhC(4)H), 7.37–7.42 (2H, m, N(1)PhC(3,5)H), 7.48–7.52 (3H, m, C(3)PhC(3,4,5)H), 7.72–7.74 (2H, m, N(1)PhC(2,6)H), 7.76–7.79 (2H, m, C(3)PhC(2,6)H).

#### 3-Methyl-1-(2-methylbenzyl)-1-phenyl-1,4-dihydro-5H-pyrazol-5-one (20)

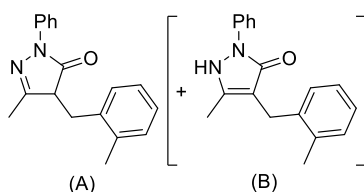

Following General Procedure **6**, ethyl acetoacetate (2.60 g, 20.0 mmol), 1-(bromomethyl)-2-methylbenzene (4.81 g, 26.0 mmol), potassium carbonate (3.60 g, 26.0 mmol) and acetone (20 mL) afforded ethyl 2-(2-methylbenzyl)-3-oxobutanoate (4.69 g, quant.) as a colourless liquid; Following General Procedure, the mixture of ethyl 2-(2-methylbenzyl)-3-oxobutanoate (4.69 g, 20.0 mmol), phenylhydrazine (2.69 g, 22.0 mmol) and EtOH (20 mL) were refluxed for 1 d to afford the title compound (2.5 g, 45% yield) as a yellow solid; **<sup>1</sup>H NMR (400 MHz, CDCl<sub>3</sub>, 1:4.2 A:B)**  $\delta_{\text{H}}$ : 1.78 (B, 3H, s, ArCH<sub>3</sub>), 1.95 (A, 3H, s, ArCH<sub>3</sub>), 2.22 (B, 3H, s, C(3)CH<sub>3</sub>), 2.41 (A, 3H, s, C(3)CH<sub>3</sub>), 3.02–3.08 (A, 1H, m, CH<sup>A</sup>H<sup>B</sup>), 3.34–3.39 (A, 1H, m, CH<sup>A</sup>H<sup>B</sup>), 3.39 (B, 2H, s, CH<sub>2</sub>), 3.54 (A, 1H, dd, *J* 14.8, 9.1, CH), 6.82–6.88 (A, 1H, m, ArH and B, 1H, m, ArH), 6.95–6.97 (B, 1H, m, ArH), 7.01–7.29 (A, 4H, m,

ArH and B, 5H, m, ArH), 7.41–7.45 (A, 2H, m, ArH), 7.51–7.53 (B, 2H, m, ArH), 7.89–7.92 (A, 2H, m, ArH).

### 3-Methyl-1-(3-methylbenzyl)-1-phenyl-1,4-dihydro-5H-pyrazol-5-one (21)

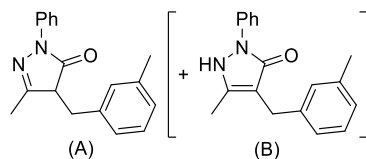

Following General Procedure **6**, ethyl acetoacetate (1.30 g, 10.0 mmol), 1-(bromomethyl)-3-methylbenzene (2.41 g, 13.0 mmol), potassium carbonate (1.80 g, 13.0 mmol) and acetone (10 mL) afforded ethyl 2-(3-methylbenzyl)-3-oxobutanoate (2.07 g, 88% yield) as a colourless liquid; Following General Procedure, the mixture of ethyl 2-(3-methylbenzyl)-3-oxobutanoate (2.11 g, 9.0 mmol), phenylhydrazine (1.21 g, 9.9 mmol) and EtOH (9 mL) were refluxed for 1 d to afford the title compound (1.44 g, 57% yield) as an orange solid;  $^1\text{H NMR}$  (400 MHz,  $\text{CDCl}_3$ , **3.4:1 A:B**)  $\delta_{\text{H}}$ : 1.95 (A, 3H, s, ArCH<sub>3</sub>), 2.05 (B, 3H, s, ArCH<sub>3</sub>), 2.21 (A, 3H, s, C(3)CH<sub>3</sub>), 2.23 (B, 3H, s, C(3)CH<sub>3</sub>), 3.11 (A, 1H, dd, *J* 14.3, 7.1, CH<sup>A</sup>H<sup>B</sup>), 3.19 (A, 1H, dd, *J* 14.3, 5.3, CH<sup>A</sup>H<sup>B</sup>), 3.46 (A, 1H, t, *J* 6.0, CH), 3.55 (B, 2H, s, CH<sub>2</sub>), 6.93–7.11 (A, 5H, m, ArH and B, 5H, m, ArH), 7.28–7.32 (A, 2H, m, ArH and B, 2H, m, ArH), 7.61–7.63 (B, 2H, m, ArH), 7.70–7.73 (A, 2H, m, ArH).

### 3-Methyl-1-(4-chlorobenzyl)-1-phenyl-1,4-dihydro-5H-pyrazol-5-one (22)

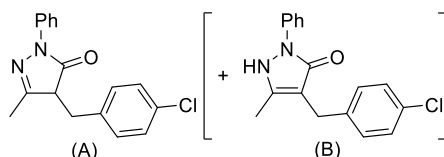

Following General Procedure **6**, ethyl acetoacetate (1.30 g, 10.0 mmol), 1-(bromomethyl)-4-chlorobenzene (2.67 g, 13.0 mmol), potassium carbonate (1.82 g, 13.0 mmol) and acetone (10 mL) afforded ethyl 2-(4-chlorobenzyl)-3-oxobutanoate (1.02 g, 40% yield) as a colourless liquid; Following General Procedure, the mixture of ethyl 2-(4-chlorobenzyl)-3-oxobutanoate (0.61 g, 2.40 mmol), phenylhydrazine (0.32 g, 2.64 mmol) and EtOH (3 mL) were refluxed for 1 d to afford the title compound (0.52 g, 73% yield) as an orange solid;  $^1\text{H NMR}$  (400 MHz,  $\text{CDCl}_3$ , **2.5:1 A:B**)  $\delta_{\text{H}}$ : 2.00 (A, 3H, s, CH<sub>3</sub>) 2.08 (B, 3H, s, CH<sub>3</sub>), 3.13–3.22 (A, 2H, m, CH<sub>2</sub>), 3.46 (A, 1H, t, *J* 6.0, CH), 3.55 (B, 2H, s, CH<sub>2</sub>), 7.07–7.18 (A, 5H, m, ArH and B, 5H, m, ArH), 7.28–7.34 (A, 2H, m, ArH and B, 2H, m, ArH), 7.59–7.62 (B, 2H, m, ArH), 7.69–7.72 (A, 2H, m, ArH).

### 3-Methyl-1-(4-cyanobenzyl)-1-phenyl-1,4-dihydro-5H-pyrazol-5-one (23)

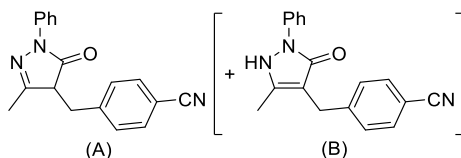

Following General Procedure **6**, ethyl acetoacetate (0.65 g, 5.0 mmol), 4-(bromomethyl)benzonitrile (1.27 g, 6.5 mmol), potassium carbonate (0.90 g, 6.5 mmol) and acetone (5 mL) afforded ethyl 2-(4-cyanobenzyl)-3-oxobutanoate (0.17 g, 14% yield) as a colourless liquid; Following General Procedure, the mixture of ethyl 2-(4-cyanobenzyl)-3-oxobutanoate (0.17 g, 0.7 mmol), phenylhydrazine (0.23 g, 2.1 mmol) and EtOH (2 mL) were refluxed for 1 d to afford the title compound (0.18 g, 89% yield) as an

orange solid;  $^1\text{H NMR}$  (400 MHz,  $\text{CDCl}_3$ , 1:2.7 A:B)  $\delta_{\text{H}}$ : 2.05 (B, 3H, s,  $\text{CH}_3$ ) 2.12 (A, 3H, s,  $\text{CH}_3$ ), 3.27–3.41 (A, 2H, m,  $\text{CH}_2$ ), 3.59 (br, A, 1H,  $\text{CH}$  and B, 2H,  $\text{CH}_2$ ), 7.14–7.60 (A, 7H, m,  $\text{ArH}$  and B, 9H, m,  $\text{ArH}$ ), 7.75–7.77 (A, 2H, m,  $\text{ArH}$ ).

**3-Methyl-1,4-diphenyl-1,4-dihydro-5H-pyrazol-5-one (24)**

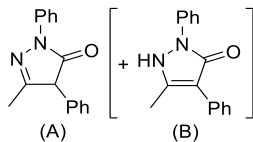

Following General Procedure 6, the mixture of ethyl 3-oxo-2-phenylbutanoate (1.03 g, 5 mmol), phenylhydrazine (0.59 g, 5.5 mmol) and EtOH (5 mL) were refluxed for 1 d to afford the title compound (0.70 g, 56% yield) as a white solid.  $^1\text{H NMR}$  (400 MHz,  $\text{CDCl}_3$ , 1:2.7 A:B)  $\delta_{\text{H}}$ : 2.12 (A, 3H, s,  $\text{C}(3)\text{CH}_3$ ), 2.30 (B, 3H, s,  $\text{C}(3)\text{CH}_3$ ), 4.39 (A, 1H, s,  $\text{CH}$ ), 7.18–7.24 (A, 3H, m,  $\text{ArH}$  and B, 3H, m,  $\text{ArH}$ ), 7.31–7.45 (A, 5H, m,  $\text{ArH}$  and B, 3H, m,  $\text{ArH}$ ), 7.50–7.52 (B, 2H, m,  $\text{ArH}$ ), 7.68–7.70 (B, 2H, m,  $\text{ArH}$ ), 7.95–7.97 (A, 2H, m,  $\text{ArH}$ ).

## 4 Michael Addition Products

### 4.1 Data for Michael adducts with dihydropyrazol-5-ones

(*S*)-*N*-benzyl-3-((*S*)-3,4-dimethyl-5-oxo-1-phenyl-4,5-dihydro-1*H*-pyrazol-4-yl)-4,4,4-trifluorobutanamide (**12**<sub>major</sub>) and (*S*)-*N*-benzyl-3-((*R*)-3,4-dimethyl-5-oxo-1-phenyl-4,5-dihydro-1*H*-pyrazol-4-yl)-4,4,4-trifluorobutanamide (**12**<sub>minor</sub>)

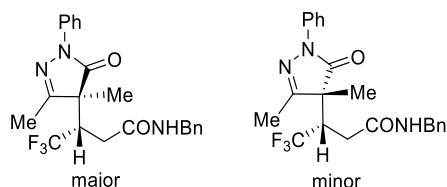

Following General Procedure **7**, 4,5-dimethyl-2-phenyl-2,4-dihydro-3*H*-pyrazol-3-one (37.6 mg, 0.2 mmol), 4-nitrophenyl (*E*)-4,4,4-trifluorobut-2-enoate (52.2 mg, 0.2 mmol) and (2*S*,3*R*)-HyperBTM (12.3 mg, 0.04 mmol) in THF at 0 °C for 24 h. Benzyl amine (109  $\mu$ L, 1.0 mmol) was added and the reaction stirred at room temperature for 16 h. The crude product (71:29 dr) was purified by flash silica chromatography (67:33 Petrol : EtOAc,  $R_f$  0.21<sub>major</sub> and 0.33<sub>minor</sub>) to give:

**12**<sub>major</sub> (50.9 mg, 61 %) as a colourless oil.  $[\alpha]_D^{20} = +31.0$  ( $c$  1.5, CHCl<sub>3</sub>); Chiral HPLC analysis, Chiralcel OD-H (95:5 hexane : IPA, flow rate 1 mLmin<sup>-1</sup>, 254 nm, 30 °C)  $t_R$  (minor): 31.3 min,  $t_R$  (major): 38.3 min, 96:4 er;  $v_{max}$  (film) 3310 (N-H), 2957, 2928 (C-H), 1699 (C=O, amide), 1684 (C=N), 1653 (C=O, lactam), 1172, 1148, 1126 (C-F); <sup>1</sup>H NMR (500 MHz, CDCl<sub>3</sub>)  $\delta_H$ : 1.38 (3H, s, C(4)CH<sub>3</sub>), 2.16 (3H, s, C(3)CH<sub>3</sub>), 2.51 (1H, dd,  $J$  16.2, 5.0, CH<sup>A</sup>H<sup>B</sup>CO), 2.60 (1H, dd,  $J$  16.2, 6.6, CH<sup>A</sup>H<sup>B</sup>CO), 3.63–3.71 (1H, m, CF<sub>3</sub>CH), 4.38 (1H, dd,  $J$  14.7, 5.8, CH<sup>A</sup>H<sup>B</sup>Ph), 4.44 (1H, dd,  $J$  14.7, 5.8, CH<sup>A</sup>H<sup>B</sup>Ph), 6.63 (1H, t,  $J$  5.8, NH), 7.20–7.34 (6H, m, CH-Ar), 7.38–7.41 (2H, m, CH-Ar), 7.85–7.87 (2H, m, CH-Ar); <sup>19</sup>F{<sup>1</sup>H} NMR (376 MHz, CDCl<sub>3</sub>)  $\delta_F$ : -66.5 (s, CF<sub>3</sub>); <sup>13</sup>C{<sup>1</sup>H} NMR (101 MHz, CDCl<sub>3</sub>)  $\delta_C$ : 14.9 (C(3)CH<sub>3</sub>), 19.5 (C(4)CH<sub>3</sub>), 31.5 (CH<sub>2</sub>CO), 43.4 (q, <sup>2</sup> $J_{CF}$  26.4, CF<sub>3</sub>CH), 44.0 (CH<sub>2</sub>Ph), 53.3 (C(4)), 119.1 (2 $\times$ CH-Ar), 125.5 (CH-Ar), 126.6 (q, <sup>1</sup> $J_{CF}$  281.6, CF<sub>3</sub>), 127.6 (CH-Ar), 127.8 (2 $\times$ CH-Ar), 128.7 (2 $\times$ CH-Ar), 128.9 (2 $\times$ CH-Ar), 137.7 (C-Ar), 137.8 (C-Ar), 161.3 (C(3)), 168.8 (NHC=O), 174.1 (C(5)=O); HRMS (NSI<sup>+</sup>) C<sub>22</sub>H<sub>23</sub>F<sub>3</sub>N<sub>3</sub>O<sub>2</sub> [M+H]<sup>+</sup> found 418.1732, requires 418.1737 (-1.2 ppm).

**12**<sub>minor</sub> (21.9 mg, 26 %) as a white solid. mp 145–146 °C;  $[\alpha]_D^{20} = +29.0$  ( $c$  1.4, CHCl<sub>3</sub>); Chiral HPLC analysis, Chiralpak AD-H (95:5 hexane : IPA, flow rate 1 mLmin<sup>-1</sup>, 254 nm, 30 °C)  $t_R$  (minor): 17.1 min,  $t_R$  (major): 23.1 min, 96:4 er;  $v_{max}$  (film) 3310 (N-H), 2926 (C-H), 1701 (C=O, amide), 1684 (C=N), 1647 (C=O, lactam), 1165, 1124, 1113 (C-F); <sup>1</sup>H NMR (500 MHz, CDCl<sub>3</sub>)  $\delta_H$ : 1.38 (3H, s, C(4)CH<sub>3</sub>), 2.21 (3H, s, C(3)CH<sub>3</sub>), 2.68 (1H, dd,  $J$  16.9, 5.4, CH<sup>A</sup>H<sup>B</sup>CO), 3.30 (1H, dd,  $J$  16.9, 5.4, CH<sup>A</sup>H<sup>B</sup>CO), 3.58–3.63 (1H, m, CF<sub>3</sub>CH), 4.40 (1H, dd,  $J$  14.8, 5.8, CH<sup>A</sup>H<sup>B</sup>Ph), 4.48 (1H, dd,  $J$  14.8, 5.8, CH<sup>A</sup>H<sup>B</sup>Ph), 6.38 (1H, t,  $J$  5.8, NH), 7.21–7.35 (6H, m, CH-Ar), 7.39–7.42 (2H, m, CH-Ar), 7.82–7.84 (2H, m, CH-Ar); <sup>19</sup>F{<sup>1</sup>H} NMR (376 MHz, CDCl<sub>3</sub>)  $\delta_F$ : -67.4 (s, CF<sub>3</sub>); <sup>13</sup>C{<sup>1</sup>H} NMR (101 MHz, CDCl<sub>3</sub>)  $\delta_C$ : 13.7 (C(3)CH<sub>3</sub>), 20.2 (C(4)CH<sub>3</sub>), 29.6 (CH<sub>2</sub>CO), 43.9 (q, <sup>2</sup> $J_{CF}$  25.9, CF<sub>3</sub>CH), 44.0 (CH<sub>2</sub>Ph), 51.2 (C(4)), 119.4 (2 $\times$ CH-Ar), 125.6 (CH-Ar), 126.3 (q, <sup>1</sup> $J_{CF}$  281.2, CF<sub>3</sub>), 127.6 (CH-Ar), 127.7 (2 $\times$ CH-Ar), 128.7 (2 $\times$ CH-Ar), 128.9 (2 $\times$ CH-Ar), 137.7 (C-Ar), 137.8 (C-Ar), 162.9 (C(3)), 169.7 (NHC=O), 173.7 (C(5)=O); HRMS (NSI<sup>+</sup>) C<sub>22</sub>H<sub>23</sub>F<sub>3</sub>N<sub>3</sub>O<sub>2</sub> [M+H]<sup>+</sup> found 418.1735, requires 418.1737 (-0.4 ppm).

**(S)-N-benzyl-4,4,4-trifluoro-3-((S)-1,3,4-trimethyl-5-oxo-4,5-dihydro-1H-pyrazol-4-yl)butanamide (25<sub>major</sub>) and (S)-N-benzyl-4,4,4-trifluoro-3-((R)-1,3,4-trimethyl-5-oxo-4,5-dihydro-1H-pyrazol-4-yl)butanamide (25<sub>minor</sub>)**

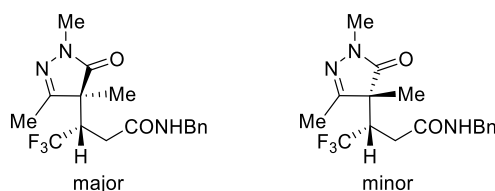

Following General Procedure 7, pyrazol-one (25.2 mg, 0.2 mmol), 4-nitrophenyl (*E*)-4,4,4-trifluorobut-2-enoate (52.2 mg, 0.2 mmol) and (2*S*,3*R*)-HyperBTM (12.3 mg, 0.04 mmol) in THF at 0 °C for 72 h. Benzyl amine (109  $\mu$ L, 1.0 mmol) was added and the reaction stirred at room temperature overnight. The crude product (61:39 dr) was purified by flash silica chromatography (50:50 Petrol : EtOAc,  $R_f$  0.26<sub>major</sub> and 0.41<sub>minor</sub>) to give:

**25<sub>major</sub>** (20.1 mg, 28 %) as a colourless oil.  $[\alpha]_D^{20} = +21.4$  ( $c$  0.8,  $\text{CHCl}_3$ ); Chiral HPLC analysis, Chiralcel OJ-H (93:7 hexane : IPA, flow rate 1 mLmin<sup>-1</sup>, 254 nm, 30 °C)  $t_R$  (minor): 15.8 min,  $t_R$  (major): 19.5 min, 92:8 er;  $\nu_{\text{max}}$  (film) 3310 (N-H), 2970, 2932 (C-H), 1697 (C=O, amide), 1684 (C=N), 1647 (C=O, lactam), 1165, 1126 (C-F); **<sup>1</sup>H NMR (400 MHz, CDCl<sub>3</sub>)**  $\delta_H$ : 1.31 (3H, s, C(4)CH<sub>3</sub>), 2.09 (3H, s, C(3)CH<sub>3</sub>), 2.35 (1H, dd,  $J$  16.0, 4.7, CH<sup>A</sup>H<sup>B</sup>CO), 2.51 (1H, dd,  $J$  16.0, 7.1, CH<sup>A</sup>H<sup>B</sup>CO), 3.26 (3H, s, N(1)CH<sub>3</sub>), 3.47–3.57 (1H, m, CF<sub>3</sub>CH), 4.41–4.51 (2H, m, CH<sub>2</sub>Ph), 6.10 (1H, br, NH), 7.27–7.39 (5H, m, CH-Ar); **<sup>19</sup>F{<sup>1</sup>H} NMR (376 MHz, CDCl<sub>3</sub>)**  $\delta_F$ : -66.1 (s, CF<sub>3</sub>); **<sup>13</sup>C{<sup>1</sup>H} NMR (101 MHz, CDCl<sub>3</sub>)**  $\delta_C$ : 14.7 (C(3)CH<sub>3</sub>), 19.1 (C(4)CH<sub>3</sub>), 31.2 (N(1)CH<sub>3</sub>), 31.9 (CH<sub>2</sub>CO), 43.4 (q,  $^2J_{CF}$  26.4, CF<sub>3</sub>CH), 44.1 (CH<sub>2</sub>Ph), 51.7 (C(4)), 126.5 (q,  $^1J_{CF}$  281.8, CF<sub>3</sub>), 127.8 (CH-Ar), 127.9 (2 $\times$ CH-Ar), 128.8 (2 $\times$ CH-Ar), 137.7 (C-Ar), 160.5 (C(3)), 168.5 (NHC=O), 175.4 (C(5)=O); **HRMS (NSI<sup>+</sup>)** C<sub>17</sub>H<sub>21</sub>F<sub>3</sub>N<sub>3</sub>O<sub>2</sub> [M+H]<sup>+</sup> found 356.1583, requires 356.1580 (+0.7 ppm).

**25<sub>minor</sub>** (10.4 mg, 15 %) as a white solid. mp 113–114 °C;  $[\alpha]_D^{20} = +8.9$  ( $c$  0.5,  $\text{CHCl}_3$ ); Chiral HPLC analysis, Chiralpak AD-H (97:3 hexane : IPA, flow rate 1 mLmin<sup>-1</sup>, 254 nm, 30 °C)  $t_R$  (minor): 22.6 min,  $t_R$  (major): 29.5 min, 96:4 er;  $\nu_{\text{max}}$  (film) 3304 (N-H), 2965, 2932 (C-H), 1699 (C=O, amide), 1684 (C=N), 1653 (C=O, lactam), 1273, 1155, 1126 (C-F); **<sup>1</sup>H NMR (400 MHz, CDCl<sub>3</sub>)**  $\delta_H$ : 1.27 (3H, s, C(4)CH<sub>3</sub>), 2.09 (3H, s, C(3)CH<sub>3</sub>), 2.61 (1H, dd,  $J$  17.0, 5.3, CH<sup>A</sup>H<sup>B</sup>CO), 3.15 (3H, s, N(1)CH<sub>3</sub>), 3.27 (1H, dd,  $J$  17.0, 5.6, CH<sup>A</sup>H<sup>B</sup>CO), 3.47–3.57 (1H, m, CF<sub>3</sub>CH), 4.43–4.54 (2H, m, CH<sub>2</sub>Ph), 6.68 (1H,  $J$  5.5, NH), 7.27–7.36 (5H, m, CH-Ar); **<sup>19</sup>F{<sup>1</sup>H} NMR (376 MHz, CDCl<sub>3</sub>)**  $\delta_F$ : -67.7 (s, CF<sub>3</sub>); **<sup>13</sup>C{<sup>1</sup>H} NMR (101 MHz, CDCl<sub>3</sub>)**  $\delta_C$ : 13.5 (C(3)CH<sub>3</sub>), 19.9 (C(4)CH<sub>3</sub>), 29.4 (N(1)CH<sub>3</sub>), 31.0 (CH<sub>2</sub>CO), 43.5 (q,  $^2J_{CF}$  26.0, CF<sub>3</sub>CH), 43.9 (CH<sub>2</sub>Ph), 49.7 (C(4)), 126.3 (q,  $^1J_{CF}$  281.3, CF<sub>3</sub>), 127.6 (CH-Ar), 127.7 (2 $\times$ CH-Ar), 128.7 (2 $\times$ CH-Ar), 138.0 (C-Ar), 162.4 (C(3)), 169.9 (NHC=O), 175.1 (C(5)=O); **HRMS (NSI<sup>+</sup>)** C<sub>17</sub>H<sub>21</sub>F<sub>3</sub>N<sub>3</sub>O<sub>2</sub> [M+H]<sup>+</sup> found 356.1584, requires 356.1580 (+1.0 ppm).

**(S)-N-benzyl-3-((S)-1-benzyl-3,4-dimethyl-5-oxo-4,5-dihydro-1H-pyrazol-4-yl)-4,4,4-trifluorobutanamide (26<sub>major</sub>) and (S)-N-benzyl-3-((R)-1-benzyl-3,4-dimethyl-5-oxo-4,5-dihydro-1H-pyrazol-4-yl)-4,4,4-trifluorobutanamide (26<sub>minor</sub>)**

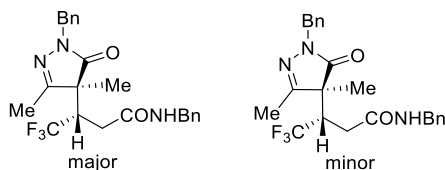

Following General Procedure 7, pyrazol-one (40.5 mg, 0.2 mmol), 4-nitrophenyl (*E*)-4,4,4-trifluorobut-2-enoate (52.2 mg, 0.2 mmol) and (2*S*,3*R*)-HyperBTM (12.3 mg, 0.04 mmol) in THF at 0 °C for 72 h. Benzyl amine (109  $\mu$ L, 1.0 mmol) was added and the reaction stirred at room temperature for 16 h. The crude product (64:36 dr) was purified by flash silica chromatography (50:50 Petrol : EtOAc,  $R_f$  0.44<sub>major</sub> and 0.52<sub>minor</sub>) to give:

**26<sub>major</sub>** (23.1 mg, 27 %) as a colourless oil.  $[\alpha]_D^{20} = +20.6$  (*c* 0.5, CHCl<sub>3</sub>); Chiral HPLC analysis, Chiralpak AD-H (90:10 hexane : IPA, flow rate 1 mLmin<sup>-1</sup>, 254 nm, 30 °C)  $t_R$  (major): 16.3 min,  $t_R$  (minor): 41.8 min, 97:3 er;  $v_{max}$  (film) 3310 (N-H), 2968, 2934 (C-H), 1697 (C=O, amide), 1684 (C=N), 1647 (C=O, lactam), 1165, 1130 (C-F); **<sup>1</sup>H NMR (400 MHz, CDCl<sub>3</sub>)**  $\delta_H$ : 1.34 (3H, s, C(4)CH<sub>3</sub>), 2.05 (3H, s, C(3)CH<sub>3</sub>), 2.23 (1H, dd, *J* 16.1, 4.7, CH<sup>A</sup>H<sup>B</sup>CO), 2.45 (1H, dd, *J* 16.1, 6.9, CH<sup>A</sup>H<sup>B</sup>CO), 3.47–3.57 (1H, m, CF<sub>3</sub>CH), 4.38 (1H, dd, *J* 14.7, 5.7, CONHCH<sup>A</sup>H<sup>B</sup>Ph), 4.46 (1H, dd, *J* 14.7, 5.7, CONHCH<sup>A</sup>H<sup>B</sup>Ph), 4.77 (1H, d, *J* 14.9, N(1)CH<sup>A</sup>H<sup>B</sup>Ph), 4.84 (1H, d, *J* 14.9, N(1)CH<sup>A</sup>H<sup>B</sup>Ph), 5.76 (1H, t, *J* 5.7, NH), 7.25–7.40 (10H, m, CH-Ar); **<sup>19</sup>F{<sup>1</sup>H} NMR (376 MHz, CDCl<sub>3</sub>)**  $\delta_F$ : -65.6 (s, CF<sub>3</sub>); **<sup>13</sup>C{<sup>1</sup>H} NMR (101 MHz, CDCl<sub>3</sub>)**  $\delta_C$ : 14.6 (C(3)CH<sub>3</sub>), 19.2 (C(4)CH<sub>3</sub>), 31.9 (CH<sub>2</sub>CO), 42.7 (q, *J* 26.6, CF<sub>3</sub>CH), 44.1 (CONHCH<sub>2</sub>Ph), 48.0 (NCH<sub>2</sub>Ph), 51.9 (C(4)), 125.1 (CF<sub>3</sub>), 127.77 (CH-Ar), 127.81 (CH-Ar), 127.9 (2 $\times$ CH-Ar), 128.3 (2 $\times$ CH-Ar), 128.7 (2 $\times$ CH-Ar), 128.8 (2 $\times$ CH-Ar), 136.5 (C-Ar), 137.6 (C-Ar), 160.7 (C(3)), 168.4 (NHC=O), 175.0 (C(5)=O); **HRMS (NSI<sup>+</sup>)** C<sub>23</sub>H<sub>25</sub>F<sub>3</sub>N<sub>3</sub>O<sub>2</sub> [M+H]<sup>+</sup> found 432.1891, requires 432.1893 (-0.6 ppm).

**26<sub>minor</sub>** (15.3 mg, 18 %) as a colourless oil.  $[\alpha]_D^{20} = +11.5$  (*c* 0.5, CHCl<sub>3</sub>); Chiral HPLC analysis, Chiralpak AD-H (93:7 hexane : IPA, flow rate 1 mLmin<sup>-1</sup>, 254 nm, 30 °C)  $t_R$  (minor): 19.0 min,  $t_R$  (major): 39.7 min, 97:3 er;  $v_{max}$  (film) 3310 (N-H), 2926 (C-H), 1699 (C=O, amide), 1684 (C=N), 1645 (C=O, lactam), 1271, 1155, 1126 (C-F); **<sup>1</sup>H NMR (400 MHz, CDCl<sub>3</sub>)**  $\delta_H$ : 1.30 (3H, s, C(4)CH<sub>3</sub>), 2.09 (3H, s, C(3)CH<sub>3</sub>), 2.60 (1H, dd, *J* 16.9, 5.2, CH<sup>A</sup>H<sup>B</sup>CO), 3.29 (1H, dd, *J* 16.9, 5.7, CH<sup>A</sup>H<sup>B</sup>CO), 3.48–3.57 (1H, m, CF<sub>3</sub>CH), 4.50 (2H, d, *J* 5.7, NCH<sub>2</sub>Ph), 4.76 (1H, d, *J* 15.2, NCH<sup>A</sup>H<sup>B</sup>Ph), 4.83 (1H, d, *J* 15.2, NCH<sup>A</sup>H<sup>B</sup>Ph), 6.06 (1H, t, *J* 5.1, NH), 7.27–7.39 (10H, m, CH-Ar); **<sup>19</sup>F{<sup>1</sup>H} NMR (376 MHz, CDCl<sub>3</sub>)**  $\delta_F$ : -67.4 (s, CF<sub>3</sub>); **<sup>13</sup>C{<sup>1</sup>H} NMR (101 MHz, CDCl<sub>3</sub>)**  $\delta_C$ : 13.6 (C(3)CH<sub>3</sub>), 20.2 (C(4)CH<sub>3</sub>), 29.6 (CH<sub>2</sub>CO), 43.4 (q, *J* 26.1, CF<sub>3</sub>CH), 44.1 (CONHCH<sub>2</sub>Ph), 47.8 (NCH<sub>2</sub>Ph), 49.8 (C(4)), 124.9 (CF<sub>3</sub>), 127.70 (CH-Ar), 127.74 (CH-Ar), 127.8 (C $\times$ CH-Ar), 127.9 (2 $\times$ CH-Ar), 128.6 (2 $\times$ CH-Ar), 128.8 (2 $\times$ CH-Ar), 136.2 (C-Ar), 137.7 (C-Ar), 162.4 (C(3)), 169.6 (NHC=O), 174.9 (C(5)=O); **HRMS (NSI<sup>+</sup>)** C<sub>23</sub>H<sub>25</sub>F<sub>3</sub>N<sub>3</sub>O<sub>2</sub> [M+H]<sup>+</sup> found 432.1892, requires 432.1893 (-0.3 ppm).

**(S)-N-benzyl-3-((S)-4-ethyl-3-methyl-5-oxo-1-phenyl-4,5-dihydro-1H-pyrazol-4-yl)-4,4,4-trifluorobutanamide (27<sub>major</sub>) and (S)-N-benzyl-3-((R)-4-ethyl-3-methyl-5-oxo-1-phenyl-4,5-dihydro-1H-pyrazol-4-yl)-4,4,4-trifluorobutanamide (27<sub>minor</sub>)**

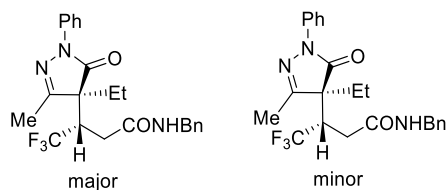

Following General Procedure 7, 4-ethyl-5-methyl-2-phenyl-2,4-dihydro-3H-pyrazol-3-one (40.5 mg, 0.2 mmol), 4-nitrophenyl (*E*)-4,4,4-trifluorobut-2-enoate (52.2 mg, 0.2 mmol) and (2*S*,3*R*)-HyperBTM (12.3 mg, 0.04 mmol) in THF at 0 °C for 72 h. Benzyl amine (109  $\mu$ L, 1.0 mmol) was added and the reaction stirred at room temperature for 16 h. The crude product (66:34 dr) was purified by flash silica chromatography (67:33 Petrol : EtOAc,  $R_f$  0.29<sub>major</sub> and 0.43<sub>minor</sub>) to give:

**27<sub>major</sub>** (38.3 mg, 44 %) as a colourless oil.  $[\alpha]_D^{20} = -4.9$  ( $c$  1.7, CHCl<sub>3</sub>); Chiral HPLC analysis, Chiralpak AD-H (90:10 hexane : IPA, flow rate 1 mLmin<sup>-1</sup>, 254 nm, 30 °C)  $t_R$  (major): 15.0 min,  $t_R$  (minor): 41.9 min, 96:4 er;  $v_{max}$  (film) 3310 (N-H), 2959, 2930 (C-H), 1699 (C=O, amide), 1684 (C=N), 1653 (C=O, lactam), 1171, 1142, 1121 (C-F); **<sup>1</sup>H NMR (400 MHz, CDCl<sub>3</sub>)**  $\delta_H$ : 0.73 (3H, t,  $J$  7.4, CH<sub>2</sub>CH<sub>3</sub>), 1.78 (1H, dq,  $J$  14.4, 7.4, CH<sup>A</sup>H<sup>B</sup>CH<sub>3</sub>), 1.97 (1H, dq,  $J$  14.4, 7.4, CH<sup>A</sup>H<sup>B</sup>CH<sub>3</sub>), 2.14 (3H, s, C(3)CH<sub>3</sub>), 2.48–2.60 (2H, m, CH<sub>2</sub>CO), 3.65–3.74 (1H, m, CF<sub>3</sub>CH), 4.40–4.49 (2H, m, CH<sub>2</sub>Ph), 6.29 (1H, t,  $J$  5.8, NH), 7.19–7.36 (6H, m, CH-Ar), 7.38–7.43 (2H, m, CH-Ar), 7.84–7.87 (2H, m, CH-Ar); **<sup>19</sup>F{<sup>1</sup>H} NMR (376 MHz, CDCl<sub>3</sub>)**  $\delta_F$ : -66.0 (s, CF<sub>3</sub>); **<sup>13</sup>C{<sup>1</sup>H} NMR (101 MHz, CDCl<sub>3</sub>)**  $\delta_C$ : 7.5 (C(4)CH<sub>2</sub>CH<sub>3</sub>), 15.1 (C(3)CH<sub>3</sub>), 25.8 (C(4)CH<sub>2</sub>CH<sub>3</sub>), 31.6 (CH<sub>2</sub>CO), 43.8 (q, <sup>2</sup> $J_{CF}$  26.2, CF<sub>3</sub>CH), 44.0 (CH<sub>2</sub>Ph), 58.2 (C(4)), 119.1 (2 $\times$ CH-Ar), 125.5 (CH-Ar), 126.6 (q, <sup>1</sup> $J_{CF}$  281.7, CF<sub>3</sub>), 127.7 (CH-Ar), 127.8 (2 $\times$ CH-Ar), 128.79 (2 $\times$ CH-Ar), 128.9 (2 $\times$ CH-Ar), 137.5 (C-Ar), 137.7 (C-Ar), 159.5 (C(3)), 168.6 (NHC=O), 173.3 (C(5)=O); **HRMS (NSI<sup>+</sup>)** C<sub>23</sub>H<sub>25</sub>F<sub>3</sub>N<sub>3</sub>O<sub>2</sub> [M+H]<sup>+</sup> found 432.1890, requires 432.1893 (-0.8 ppm).

**27<sub>minor</sub>** (23.4 mg, 27 %) as a colourless oil.  $[\alpha]_D^{20} = +47.7$  ( $c$  1.0, CHCl<sub>3</sub>); Chiral HPLC analysis, Chiralpak AD-H (97:3 hexane : IPA, flow rate 1 mLmin<sup>-1</sup>, 254 nm, 30 °C)  $t_R$  (major): 30.9 min,  $t_R$  (minor): 36.4 min, 98:2 er;  $v_{max}$  (film) 3310 (N-H), 2963, 2926 (C-H), 1699 (C=O, amide), 1684 (C=N), 1645 (C=O, lactam), 1267, 1165, 1117 (C-F); **<sup>1</sup>H NMR (400 MHz, CDCl<sub>3</sub>)**  $\delta_H$ : 0.68 (3H, t,  $J$  7.4, CH<sub>2</sub>CH<sub>3</sub>), 1.76 (1H, dq,  $J$  13.4, 7.4, CH<sup>A</sup>H<sup>B</sup>CH<sub>3</sub>), 1.95 (1H, dq,  $J$  13.4, 7.4, CH<sup>A</sup>H<sup>B</sup>CH<sub>3</sub>), 2.18 (3H, s, C(3)CH<sub>3</sub>), 2.62 (1H, dd,  $J$  17.0, 5.4, CH<sup>A</sup>H<sup>B</sup>CO), 3.36 (1H, dd,  $J$  17.0, 5.4, CH<sup>A</sup>H<sup>B</sup>CO), 3.58–3.68 (1H, m, CF<sub>3</sub>CH), 4.42 (1H, dd,  $J$  14.8, 5.8, CH<sup>A</sup>H<sup>B</sup>Ph), 4.50 (1H, dd,  $J$  14.8, 5.8, C<sup>A</sup>H<sup>B</sup>Ph), 6.25 (1H, t,  $J$  5.9, NH), 7.21–7.37 (6H, m, CH-Ar), 7.39–7.44 (2H, m, CH-Ar), 7.80–7.83 (2H, m, CH-Ar); **<sup>19</sup>F{<sup>1</sup>H} NMR (376 MHz, CDCl<sub>3</sub>)**  $\delta_F$ : -67.0 (s, CF<sub>3</sub>); **<sup>13</sup>C{<sup>1</sup>H} NMR (101 MHz, CDCl<sub>3</sub>)**  $\delta_C$ : 7.5 (C(4)CH<sub>2</sub>CH<sub>3</sub>), 14.1 (C(3)CH<sub>3</sub>), 26.4 (C(4)CH<sub>2</sub>CH<sub>3</sub>), 29.6 (CH<sub>2</sub>CO), 43.9 (q, <sup>2</sup> $J_{CF}$  26.2, CF<sub>3</sub>CH), 44.0 (CH<sub>2</sub>Ph), 56.4 (C(4)), 119.5 (2 $\times$ CH-Ar), 125.6 (CH-Ar), 126.4 (q, <sup>1</sup> $J_{CF}$  281.3, CF<sub>3</sub>), 127.7 (CH-Ar), 127.8 (2 $\times$ CH-Ar), 128.8 (2 $\times$ CH-Ar), 128.9 (2 $\times$ CH-Ar), 137.5 (C-Ar), 137.8 (C-Ar), 161.2 (C(3)), 169.7 (NHC=O), 173.0 (C(5)=O); **HRMS (NSI<sup>+</sup>)** C<sub>23</sub>H<sub>25</sub>F<sub>3</sub>N<sub>3</sub>O<sub>2</sub> [M+H]<sup>+</sup> found 432.1891, requires 432.1893 (-0.6 ppm).

**(S)-3-((S)-4-allyl-3-methyl-5-oxo-1-phenyl-4,5-dihydro-1H-pyrazol-4-yl)-N-benzyl-4,4,4-trifluorobutanamide (28<sub>major</sub>) and (S)-3-((R)-4-allyl-3-methyl-5-oxo-1-phenyl-4,5-dihydro-1H-pyrazol-4-yl)-N-benzyl-4,4,4-trifluorobutanamide (28<sub>minor</sub>)**

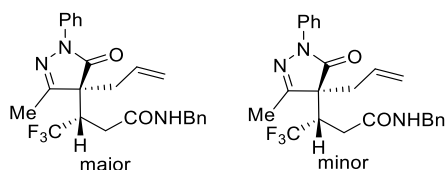

Following General Procedure 7, 4-allyl-5-methyl-2-phenyl-2,4-dihydro-3H-pyrazol-3-one (42.8 mg, 0.2 mmol), 4-nitrophenyl (*E*)-4,4,4-trifluorobut-2-enoate (52.2 mg, 0.2 mmol) and (2*S*,3*R*)-HyperBTM (12.3 mg, 0.04 mmol) in THF at room temperature for 6 h. Benzyl amine (109  $\mu$ L, 1.0 mmol) was added and the reaction stirred at room temperature for 16 h. The crude product (62:38 dr) was purified by flash silica chromatography (67:33 Petrol : EtOAc,  $R_f$  0.20<sub>major</sub> and 0.40<sub>minor</sub>) to give:

**28<sub>major</sub>** (39.1 mg, 44 %) as a pale-yellow oil.  $[\alpha]_D^{20} = -29.4$  (*c* 1.7, CHCl<sub>3</sub>); Chiral HPLC analysis, Chiralpak AD-H (90:10 hexane : IPA, flow rate 1 mLmin<sup>-1</sup>, 254 nm, 30 °C)  $t_R$  (major): 16.1 min,  $t_R$  (minor): 21.9 min, 96:4 er;  $\nu_{max}$  (film) 3312 (N-H), 2967, 2932 (C-H), 1701 (C=O, amide), 1684 (C=N), 1651 (C=O, lactam), 1169, 1121 (C-F); **<sup>1</sup>H NMR (400 MHz, CDCl<sub>3</sub>)**  $\delta_H$ : 2.19 (3H, s, C(3)CH<sub>3</sub>), 2.44–2.60 (3H, m, C(4)CH<sub>2</sub>CH=CH<sub>2</sub> and CH<sup>A</sup>H<sup>B</sup>CO), 2.75 (1H, dd, *J* 13.4, 6.9, CH<sup>A</sup>H<sup>B</sup>CO), 3.65–3.75 (1H, m, CF<sub>3</sub>CH), 4.42–4.51 (2H, m, CH<sub>2</sub>Ph), 5.08–5.11 (1H, m, CH=CH<sup>A</sup>H<sup>B</sup>), 5.15–5.19 (1H, m, CH=CH<sup>A</sup>H<sup>B</sup>), 5.33–5.44 (1H, m, CH=CH<sub>2</sub>), 5.99 (1H, br, NH), 7.19–7.42 (8H, m, CH-Ar), 7.83–7.85 (2H, m, CH-Ar); **<sup>19</sup>F{<sup>1</sup>H} NMR (376 MHz, CDCl<sub>3</sub>)**  $\delta_F$ : -65.7 (s, CF<sub>3</sub>); **<sup>13</sup>C{<sup>1</sup>H} NMR (101 MHz, CDCl<sub>3</sub>)**  $\delta_C$ : 15.3 (C(3)CH<sub>3</sub>), 31.8 (C(4)CH<sub>2</sub>CH=CH<sub>2</sub>), 36.9 (CH<sub>2</sub>CO), 43.3 (q, <sup>2</sup>*J*<sub>CF</sub> 26.5, CF<sub>3</sub>CH), 44.2 (CH<sub>2</sub>Ph), 57.8 (C(4)), 119.1 (2 $\times$ CH-Ar), 121.2 (CH=CH<sub>2</sub>), 125.4 (CH-Ar), 126.5 (q, <sup>1</sup>*J*<sub>CF</sub> 281.6, CF<sub>3</sub>), 127.8 (CH-Ar), 127.9 (2 $\times$ CH-Ar), 128.8 (2 $\times$ CH-Ar), 128.9 (2 $\times$ CH-Ar), 129.1 (CH=CH<sub>2</sub>), 137.5 (C-Ar), 137.6 (C-Ar), 159.0 (C(3)), 168.3 (NHC=O), 172.6 (C(5)=O); **HRMS (NSI<sup>+</sup>)** C<sub>24</sub>H<sub>25</sub>F<sub>3</sub>N<sub>3</sub>O<sub>2</sub> [M+H]<sup>+</sup> found 444.1891, requires 444.1893 (-0.5 ppm).

**28<sub>minor</sub>** (23.1 mg, 26 %) as a pale-yellow oil.  $[\alpha]_D^{20} = +72.5$  (*c* 0.6, CHCl<sub>3</sub>); Chiral HPLC analysis, Chiralcel OD-H (97:3 hexane : IPA, flow rate 1 mLmin<sup>-1</sup>, 254 nm, 30 °C)  $t_R$  (major): 15.2 min,  $t_R$  (minor): 24.7 min, 96:4 er;  $\nu_{max}$  (film) 3308 (N-H), 2926 (C-H), 1699 (C=O, amide), 1684 (C=N), 1651 (C=O, lactam), 1261, 1165, 1115 (C-F); **<sup>1</sup>H NMR (400 MHz, CDCl<sub>3</sub>)**  $\delta_H$ : 2.19 (3H, s, C(3)CH<sub>3</sub>), 2.52 (1H, dd, *J* 13.4, 7.7, CH<sup>A</sup>H<sup>B</sup>CO), 2.62–2.68 (2H, m, C(4)CH<sub>2</sub>CH=CH<sub>2</sub>), 3.39 (1H, dd, *J* 17.0, 5.5, CH<sup>A</sup>H<sup>B</sup>CO), 3.62–3.67 (1H, m, CF<sub>3</sub>CH), 4.42 (1H, dd, *J* 14.8, 5.8, CH<sup>A</sup>H<sup>B</sup>Ph), 4.51 (1H, dd, *J* 14.8, 5.8, CH<sup>A</sup>H<sup>B</sup>Ph), 5.08–5.11 (1H, m, CH=CH<sup>A</sup>H<sup>B</sup>), 5.12–5.17 (1H, m, CH=CH<sup>A</sup>H<sup>B</sup>), 5.28–5.38 (1H, m, CH=CH<sub>2</sub>), 6.23 (1H, t, *J* 5.8, NH), 7.20–7.43 (8H, m, CH-Ar), 7.78–7.81 (2H, m, CH-Ar); **<sup>19</sup>F{<sup>1</sup>H} NMR (376 MHz, CDCl<sub>3</sub>)**  $\delta_F$ : -66.9 (s, CF<sub>3</sub>); **<sup>13</sup>C{<sup>1</sup>H} NMR (101 MHz, CDCl<sub>3</sub>)**  $\delta_C$ : 14.4 (C(3)CH<sub>3</sub>), 29.5 (C(4)CH<sub>2</sub>CH=CH<sub>2</sub>), 37.6 (CH<sub>2</sub>CO), 43.5 (q, <sup>2</sup>*J*<sub>CF</sub> 26.1, CF<sub>3</sub>CH), 44.1 (CH<sub>2</sub>Ph), 55.7 (C(4)), 119.6 (2 $\times$ CH-Ar), 121.2 (CH=CH<sub>2</sub>), 125.6 (CH-Ar), 126.3 (q, <sup>1</sup>*J*<sub>CF</sub> 281.3, CF<sub>3</sub>), 127.7 (CH-Ar), 127.8 (2 $\times$ CH-Ar), 128.8 (2 $\times$ CH-Ar), 128.9 (2 $\times$ CH-Ar), 129.0 (CH=CH<sub>2</sub>), 137.4 (C-Ar), 137.7 (C-Ar), 160.8 (C(3)), 169.5 (NHC=O), 172.7 (C(5)=O); **HRMS (NSI<sup>+</sup>)** C<sub>24</sub>H<sub>25</sub>F<sub>3</sub>N<sub>3</sub>O<sub>2</sub> [M+H]<sup>+</sup> found 444.1890, requires 444.1893 (-0.8 ppm).



(*S*)-*N*-benzyl-3-((*S*)-4-benzyl-3-methyl-5-oxo-1-phenyl-4,5-dihydro-1*H*-pyrazol-4-yl)-4,4,4-trifluorobutanamide (**29**<sub>major</sub>) and (*S*)-*N*-benzyl-3-((*R*)-4-benzyl-3-methyl-5-oxo-1-phenyl-4,5-dihydro-1*H*-pyrazol-4-yl)-4,4,4-trifluorobutanamide (**29**<sub>minor</sub>)

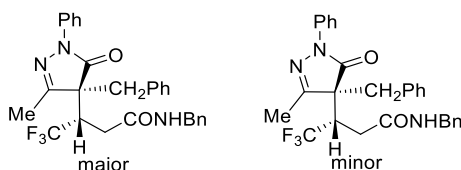

Following General Procedure **7**, 4-benzyl-5-methyl-2-phenyl-2,4-dihydro-3*H*-pyrazol-3-one (52.9 mg, 0.2 mmol), 4-nitrophenyl (*E*)-4,4,4-trifluorobut-2-enoate (52.2 mg, 0.2 mmol) and (*2S,3R*)-HyperBTM (12.3 mg, 0.04 mmol) in THF at room temperature for 24 h. Benzyl amine (109  $\mu$ L, 1.0 mmol) was added and the reaction stirred at room temperature for 16 h. The crude product (57:43 dr) was purified by flash silica chromatography (67:33 Petrol : EtOAc,  $R_f$  0.33<sub>major</sub> and 0.55<sub>minor</sub>) to give:

**29**<sub>major</sub> (44.4 mg, 45 %) as a white solid. mp 158–159 °C;  $[\alpha]_D^{20} = -80.2$  ( $c$  1.0,  $\text{CHCl}_3$ ); Chiral HPLC analysis, Chiralpak AD-H (85:15 hexane : IPA, flow rate 1 mLmin<sup>-1</sup>, 254 nm, 30 °C)  $t_R$  (major): 11.7 min,  $t_R$  (minor): 21.2 min, 99:1 er;  $v_{\text{max}}$  (film) 3294 (N-H), 2957, 2928 (C-H), 1699 (C=O, amide), 1684 (C=N), 1645 (C=O, lactam), 1263, 1165, 1126 (C-F); **<sup>1</sup>H NMR (400 MHz, CDCl<sub>3</sub>)**  $\delta_H$ : 2.17 (3H, s, C(3)CH<sub>3</sub>), 2.52 (1H, dd,  $J$  16.2, 4.8, CH<sup>A</sup>H<sup>B</sup>CO), 2.58 (1H, dd,  $J$  16.2, 6.6, CH<sup>A</sup>H<sup>B</sup>CO), 2.96 (1H, d,  $J$  13.0, C(4)CH<sup>A</sup>H<sup>B</sup>Ph), 3.16 (1H, d,  $J$  13.0, C(4)CH<sup>A</sup>H<sup>B</sup>Ph), 3.72–3.82 (1H, m, CF<sub>3</sub>CH), 4.31–4.41 (2H, m, CONHCH<sub>2</sub>Ph), 6.33 (1H, t,  $J$  5.7, NH), 6.94–6.97 (2H, m, CH-Ar), 7.01–7.05 (4H, m, CH-Ar), 7.14–7.23 (7H, m, CH-Ar), 7.27–7.30 (2H, m, CH-Ar); **<sup>19</sup>F{<sup>1</sup>H} NMR (376 MHz, CDCl<sub>3</sub>)**  $\delta_F$ : -65.5 (s, CF<sub>3</sub>); **<sup>13</sup>C{<sup>1</sup>H} NMR (101 MHz, CDCl<sub>3</sub>)**  $\delta_C$ : 15.9 (C(3)CH<sub>3</sub>), 31.8 (CH<sub>2</sub>CO), 38.8 (C(4)CH<sub>2</sub>Ph), 43.7 (q,  $^2J_{CF}$  26.4, CF<sub>3</sub>CH), 44.1 (CONHCH<sub>2</sub>Ph), 59.5 (C(4)), 119.9 (2 $\times$ CH-Ar), 125.7 (CH-Ar), 126.6 (q,  $^1J_{CF}$  281.8, CF<sub>3</sub>), 127.7 (2 $\times$ CH-Ar), 127.8 (2 $\times$ CH-Ar), 128.3 (2 $\times$ CH-Ar), 128.7 (2 $\times$ CH-Ar), 128.8 (2 $\times$ CH-Ar), 129.4 (2 $\times$ CH-Ar), 132.6 (C-Ar), 136.9 (C-Ar), 137.7 (C-Ar), 158.7 (C(3)), 168.6 (NHC=O), 172.8 (C(5)=O); **HRMS (NSI<sup>+</sup>)** C<sub>28</sub>H<sub>27</sub>F<sub>3</sub>N<sub>3</sub>O<sub>2</sub> [M+H]<sup>+</sup> found 494.2041, requires 494.2050 (-1.8 ppm).

**29**<sub>minor</sub> (25.5 mg, 26 %) as a white solid. mp 113–115 °C;  $[\alpha]_D^{20} = +138.9$  ( $c$  1.2,  $\text{CHCl}_3$ ); Chiral HPLC analysis, Chiralpak AD-H (90:10 hexane : IPA, flow rate 1 mLmin<sup>-1</sup>, 254 nm, 30 °C)  $t_R$  (minor): 23.4 min,  $t_R$  (major): 28.4 min, 95:5 er;  $v_{\text{max}}$  (film) 3310 (N-H), 2924 (C-H), 1699 (C=O, amide), 1684 (C=N), 1653 (C=O, lactam), 1263, 1165, 1117 (C-F); **<sup>1</sup>H NMR (500 MHz, CDCl<sub>3</sub>)**  $\delta_H$ : 2.22 (3H, s, C(3)CH<sub>3</sub>), 2.75 (1H, dd,  $J$  17.1, 5.0, CH<sup>A</sup>H<sup>B</sup>CO), 3.01 (1H, d,  $J$  13.2, C(4)CH<sup>A</sup>H<sup>B</sup>Ph), 3.33 (1H, d,  $J$  13.2, C(4)CH<sup>A</sup>H<sup>B</sup>Ph), 3.57 (1H, dd,  $J$  17.1, 5.6, CH<sup>A</sup>H<sup>B</sup>CO), 3.75–3.85 (1H, m, CF<sub>3</sub>CH), 4.43–4.53 (2H, m, CONHCH<sub>2</sub>Ph), 6.35 (1H, t,  $J$  5.8, NH), 7.04–7.06 (2H, m, CH-Ar), 7.14–7.36 (11H, m, CH-Ar), 7.45–7.48 (2H, m, CH-Ar); **<sup>19</sup>F{<sup>1</sup>H} NMR (376 MHz, CDCl<sub>3</sub>)**  $\delta_F$ : -66.6 (s, CF<sub>3</sub>); **<sup>13</sup>C{<sup>1</sup>H} NMR (101 MHz, CDCl<sub>3</sub>)**  $\delta_C$ : 14.8 (C(3)CH<sub>3</sub>), 29.8 (CH<sub>2</sub>CO), 39.4 (C(4)CH<sub>2</sub>Ph), 43.9 (q,  $^2J_{CF}$  26.1, CF<sub>3</sub>CH), 44.1 (CONHCH<sub>2</sub>Ph), 57.2 (C(4)), 120.4 (2 $\times$ CH-Ar), 125.5 (q,  $^1J_{CF}$  281.4, CF<sub>3</sub>), 125.9 (CH-Ar), 127.66 (CH-Ar), 127.72 (2 $\times$ CH-Ar), 127.8 (CH-Ar), 128.4 (2 $\times$ CH-Ar), 128.8 (4 $\times$ CH-Ar), 129.2 (2 $\times$ CH-Ar), 132.8 (C-Ar), 137.0 (C-Ar), 137.7 (C-Ar), 160.5 (C(3)), 169.7 (NHC=O), 172.9 (C(5)=O); **HRMS (NSI<sup>+</sup>)** C<sub>28</sub>H<sub>27</sub>F<sub>3</sub>N<sub>3</sub>O<sub>2</sub> [M+H]<sup>+</sup> found 494.2044, requires 494.2050 (-1.2 ppm).

(*S*)-*N*-benzyl-3-((*S*)-4-benzyl-5-oxo-1,3-diphenyl-4,5-dihydro-1*H*-pyrazol-4-yl)-4,4,4-trifluorobutanamide (**30**<sub>major</sub>) and (*S*)-*N*-benzyl-3-((*R*)-4-benzyl-5-oxo-1,3-diphenyl-4,5-dihydro-1*H*-pyrazol-4-yl)-4,4,4-trifluorobutanamide (**30**<sub>minor</sub>)

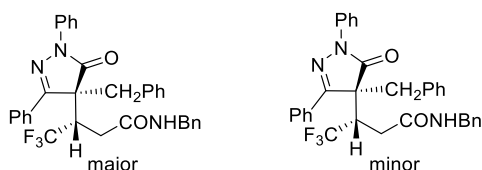

Following General Procedure 7, pyrazol-one (65.3 mg, 0.2 mmol), 4-nitrophenyl (*E*)-4,4,4-trifluorobut-2-enoate (52.2 mg, 0.2 mmol) and (2*S*,3*R*)-HyperBTM (12.3 mg, 0.04 mmol) in THF at 0 °C for 72 h. Benzyl amine (109  $\mu$ L, 1.0 mmol) was added and the reaction stirred at room temperature for 16 h. The crude product (66:34 dr) was purified by flash silica chromatography (67:33 Petrol : EtOAc,  $R_f$  0.42<sub>major</sub> and 0.61<sub>minor</sub>) to give:

**30**<sub>major</sub> (57.2 mg, 51 %) as a white solid. mp 157–158 °C;  $[\alpha]_D^{20} = +15.3$  ( $c$  0.7, CHCl<sub>3</sub>); Chiral HPLC analysis, Chiralpak AD-H (85:15 hexane : IPA, flow rate 1 mLmin<sup>-1</sup>, 254 nm, 30 °C)  $t_R$  (major): 10.3 min,  $t_R$  (minor): 24.3 min, 97:3 er;  $v_{max}$  (film) 3310 (N-H), 2924 (C-H), 1701 (C=O, amide), 1684 (C=N), 1653 (C=O, lactam), 1165, 1138, 1124 (C-F); **<sup>1</sup>H NMR (400 MHz, CDCl<sub>3</sub>)**  $\delta_H$ : 2.50 (2H, d,  $J$  6.5, 2H, CH<sub>2</sub>CO), 3.52 (1H, d,  $J$  13.1, C(4)CH<sup>A</sup>H<sup>B</sup>Ph), 3.69 (1H, d,  $J$  13.1, C(4)CH<sup>A</sup>H<sup>B</sup>Ph), 4.08–4.18 (1H, m, CF<sub>3</sub>CH), 4.32 (1H, dd,  $J$  14.6, 5.6, CONHCH<sup>A</sup>H<sup>B</sup>Ph), 4.45 (1H, dd,  $J$  14.6, 5.6, CONHCH<sup>A</sup>H<sup>B</sup>Ph), 5.81 (1H, t,  $J$  6.6, NH), 7.00–7.12 (5H, m, CH-Ar), 7.17–7.23 (3H, m, CH-Ar), 7.28–7.36 (6H, m, CH-Ar), 7.54–7.57 (4H, m, CH-Ar), 7.95–7.98 (2H, m, CH-Ar); **<sup>19</sup>F{<sup>1</sup>H} NMR (376 MHz, CDCl<sub>3</sub>)**  $\delta_F$ : -63.9 (s, CF<sub>3</sub>); **<sup>13</sup>C{<sup>1</sup>H} NMR (101 MHz, CDCl<sub>3</sub>)**  $\delta_C$ : 32.9 (CH<sub>2</sub>CO), 40.0 (C(4)CH<sub>2</sub>Ph), 44.0 (q,  $J$  26.7, CF<sub>3</sub>CH), 44.1 (CONHCH<sub>2</sub>Ph), 59.8 (C(4)), 119.9 (2 $\times$ CH-Ar), 125.2 (CF<sub>3</sub>), 125.9 (CH-Ar), 127.1 (2 $\times$ CH-Ar), 127.6 (CH-Ar), 127.7 (CH-Ar), 127.9 (2 $\times$ CH-Ar), 128.1 (2 $\times$ CH-Ar), 128.7 (2 $\times$ CH-Ar), 128.8 (2 $\times$ CH-Ar), 129.0 (2 $\times$ CH-Ar), 129.7 (2 $\times$ CH-Ar), 130.7 (CH-Ar), 131.6 (C-Ar), 132.8 (C-Ar), 137.0 (C-Ar), 137.6 (C-Ar), 157.1 (C(3)), 168.2 (NHC=O), 172.9 (C(5)=O); **HRMS (NSI<sup>+</sup>)** C<sub>33</sub>H<sub>29</sub>F<sub>3</sub>N<sub>3</sub>O<sub>2</sub> [M+H]<sup>+</sup> found 556.2199, requires 556.2206 (-1.3 ppm).

**30**<sub>minor</sub> (26.0 mg, 23 %) as a colourless oil.  $[\alpha]_D^{20} = +36.8$  ( $c$  1.1, CHCl<sub>3</sub>); Chiral HPLC analysis, Chiralcel OD-H (97:3 hexane : IPA, flow rate 1 mLmin<sup>-1</sup>, 254 nm, 30 °C)  $t_R$  (major): 16.2 min,  $t_R$  (minor): 26.1 min, 97:3 er;  $v_{max}$  (film) 3310 (N-H), 3032, 2934 (C-H), 1701 (C=O, amide), 1684 (C=N), 1653 (C=O, lactam), 1165, 1117 (C-F); **<sup>1</sup>H NMR (400 MHz, CDCl<sub>3</sub>)**  $\delta_H$ : 2.80 (1H, dd,  $J$  17.2, 4.0, CH<sup>A</sup>H<sup>B</sup>CO), 3.40 (1H, d,  $J$  13.0, C(4)CH<sup>A</sup>H<sup>B</sup>Ph), 3.59 (1H, d,  $J$  13.0, C(4)CH<sup>A</sup>H<sup>B</sup>Ph), 3.84 (1H, dd,  $J$  17.2, 6.5, CH<sup>A</sup>H<sup>B</sup>CO), 4.38–4.47 (1H, m, CF<sub>3</sub>CH), 4.55 (2H, d,  $J$  5.7, CONHCH<sub>2</sub>Ph), 6.33 (1H, t,  $J$  6.6, NH), 6.82–6.84 (2H, m, CH-Ar), 6.98–7.02 (2H, m, CH-Ar), 7.08–7.12 (1H, m, CH-Ar), 7.21–7.25 (1H, m, CH-Ar), 7.29–7.39 (7H, m, CH-Ar), 7.51–7.57 (5H, m, CH-Ar), 8.04–8.06 (2H, m, CH-Ar); **<sup>19</sup>F{<sup>1</sup>H} NMR (376 MHz, CDCl<sub>3</sub>)**  $\delta_F$ : -66.2 (s, CF<sub>3</sub>); **<sup>13</sup>C{<sup>1</sup>H} NMR (101 MHz, CDCl<sub>3</sub>)**  $\delta_C$ : 29.9 (CH<sub>2</sub>CO), 40.4 (C(4)CH<sub>2</sub>Ph), 44.1 (CONHCH<sub>2</sub>Ph), 44.4 (q,  $^2J_{CF}$  25.9, CF<sub>3</sub>CH), 56.6 (C(4)), 120.8 (2 $\times$ CH-Ar), 126.2 (CH-Ar), 126.4 (q,  $^1J_{CF}$  281.7, CF<sub>3</sub>), 126.5 (2 $\times$ CH-Ar), 127.6 (CH-Ar), 127.7 (3 $\times$ CH-Ar), 128.0 (2 $\times$ CH-Ar), 128.80 (2 $\times$ CH-Ar), 128.84 (2 $\times$ CH-Ar), 129.1 (2 $\times$ CH-Ar), 129.6 (2 $\times$ CH-Ar), 130.5 (CH-Ar), 131.1 (C-Ar), 132.6 (C-Ar), 137.0 (C-Ar), 137.7 (C-Ar), 157.9 (C(3)), 170.1 (NHC=O), 173.4 (C(5)=O); **HRMS (NSI<sup>+</sup>)** C<sub>33</sub>H<sub>29</sub>F<sub>3</sub>N<sub>3</sub>O<sub>2</sub> [M+H]<sup>+</sup> found 556.2202, requires 556.2206 (-0.8 ppm).

(*S*)-*N*-benzyl-4,4,4-trifluoro-3-((*S*)-3-methyl-4-(2-methylbenzyl)-5-oxo-1-phenyl-4,5-dihydro-1*H*-pyrazol-4-yl)butanamide (**31**<sub>major</sub>) and (*S*)-*N*-benzyl-4,4,4-trifluoro-3-((*R*)-3-methyl-4-(2-methylbenzyl)-5-oxo-1-phenyl-4,5-dihydro-1*H*-pyrazol-4-yl)butanamide (**31**<sub>minor</sub>)

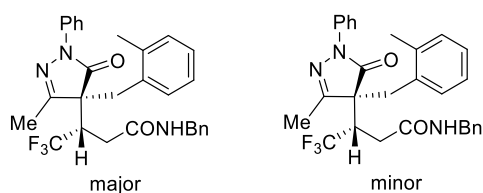

Following General Procedure 7, pyrazol-one (55.6 mg, 0.2 mmol), 4-nitrophenyl (*E*)-4,4,4-trifluorobut-2-enoate (52.2 mg, 0.2 mmol) and (2*S*,3*R*)-HyperBTM (12.3 mg, 0.04 mmol) in THF at 0 °C for 72 h. Benzyl amine (109  $\mu$ L, 1.0 mmol) was added and the reaction stirred at room temperature for 16 h. The crude product (58:42 dr) was purified by flash silica chromatography (67:33 Petrol : EtOAc,  $R_f$  0.43<sub>major</sub> and 0.64<sub>minor</sub>) to give:

**31**<sub>major</sub> (40.6 mg, 40 %) as a pale-yellow solid. mp 143–144 °C;  $[\alpha]_D^{20} = -59.2$  ( $c$  0.5, CHCl<sub>3</sub>); Chiral HPLC analysis, Chiralcel AD-H (90:10 hexane : IPA, flow rate 1 mLmin<sup>-1</sup>, 254 nm, 30 °C)  $t_R$  (major): 11.2 min,  $t_R$  (minor): 22.8 min, 99:1 er;  $v_{max}$  (film) 3319 (N-H), 2957, 2928 (C-H), 1699 (C=N), 1684 (C=O, amide), 1653 (C=O, lactam), 1167, 1134, 1121 (C-F); **<sup>1</sup>H NMR (400 MHz, CDCl<sub>3</sub>)**  $\delta_H$ : 2.33 (3H, s, C<sub>6</sub>H<sub>4</sub>CH<sub>3</sub>), 2.40 (3H, s, C(3)CH<sub>3</sub>), 2.63–2.65 (2H, m, CH<sub>2</sub>CO), 3.03 (1H, d,  $J$  13.6, C(4)CH<sup>A</sup>H<sup>B</sup>Ar), 3.47 (1H, d,  $J$  13.6, C(4)CH<sup>A</sup>H<sup>B</sup>Ar), 3.85–3.95 (1H, m, CF<sub>3</sub>CH), 4.45–4.57 (2H, m, CONHCH<sub>2</sub>Ph), 5.93 (1H, t,  $J$  5.6, NH), 6.90–6.93 (1H, m, CH-Ar), 6.96–7.00 (1H, m, CH-Ar), 7.03–7.07 (1H, m, CH-Ar), 7.09–7.16 (2H, m, CH-Ar), 7.26–7.36 (7H, m, CH-Ar), 7.37–7.40 (2H, m, CH-Ar); **<sup>19</sup>F{<sup>1</sup>H} NMR (376 MHz, CDCl<sub>3</sub>)**  $\delta_F$ : -65.5 (s, CF<sub>3</sub>); **<sup>13</sup>C{<sup>1</sup>H} NMR (101 MHz, CDCl<sub>3</sub>)**  $\delta_C$ : 16.0 (C(3)CH<sub>3</sub>), 20.3 (C<sub>6</sub>H<sub>4</sub>CH<sub>3</sub>), 32.0 (CH<sub>2</sub>CO), 34.2 (C(4)CH<sub>2</sub>Ph), 44.20 (q,  $^2J_{CF}$  26.8, CF<sub>3</sub>CH), 44.24 (CONHCH<sub>2</sub>Ph), 58.9 (C(4)), 119.9 (2 $\times$ CH-Ar), 125.6 (2 $\times$ CH-Ar), 126.5 (q,  $^1J_{CF}$  282.2, CF<sub>3</sub>), 127.6 (CH-Ar), 127.8 (CH-Ar), 127.9 (2 $\times$ CH-Ar), 128.9 (2 $\times$ CH-Ar), 128.8 (CH-Ar), 128.9 (2 $\times$ CH-Ar), 130.9 (CH-Ar), 131.5 (C-Ar), 137.1 (C-Ar), 137.3 (C-Ar), 137.6 (C-Ar), 158.5 (C(3)), 168.5 (NHC=O), 172.6 (C(5)=O); **HRMS (NSI<sup>+</sup>)** C<sub>29</sub>H<sub>29</sub>F<sub>3</sub>N<sub>3</sub>O<sub>2</sub> [M+H]<sup>+</sup> found 508.2201, requires 508.2206 (-1.1 ppm).

**31**<sub>minor</sub> (29.4 mg, 29 %) as a pale-yellow oil.  $[\alpha]_D^{20} = +125.0$  ( $c$  1.4, CHCl<sub>3</sub>); Chiral HPLC analysis, Chiralcel OD-H (95:5 hexane : IPA, flow rate 1 mLmin<sup>-1</sup>, 254 nm, 30 °C)  $t_R$  (major): 11.8 min,  $t_R$  (minor): 20.8 min, 96:4 er;  $v_{max}$  (film) 3310 (N-H), 2965, 2963 (C-H), 1699 (C=N), 1684 (C=O, amide), 1653 (C=O, lactam), 1263, 1165, 1117 (C-F); **<sup>1</sup>H NMR (400 MHz, CDCl<sub>3</sub>)**  $\delta_H$ : 2.17 (3H, s, C<sub>6</sub>H<sub>4</sub>CH<sub>3</sub>), 2.32 (3H, s, C(3)CH<sub>3</sub>), 2.78 (1H, dd,  $J$  17.2, 5.5, CH<sub>A</sub>H<sub>B</sub>CO), 3.13 (1H, d,  $J$  14.1, C(4)CH<sup>A</sup>H<sup>B</sup>Ar), 3.34 (1H, d,  $J$  14.1, C(4)CH<sup>A</sup>H<sup>B</sup>Ar), 3.55 (1H, dd,  $J$  17.2, 4.9, CH<sub>A</sub>H<sub>B</sub>CO), 3.80–3.89 (1H, m, CF<sub>3</sub>CH), 4.35 (1H, dd,  $J$  14.8, 5.8, CONHCH<sup>A</sup>H<sup>B</sup>Ph), 4.50 (1H, dd,  $J$  14.8, 5.8, CONHCH<sup>A</sup>H<sup>B</sup>Ph), 6.51 (1H, t,  $J$  5.8, NH), 6.91–6.93 (1H, m, CH-Ar), 6.96–7.00 (1H, m, CH-Ar), 7.09–7.11 (2H, m, CH-Ar), 7.18–7.36 (8H, m, CH-Ar), 7.46–7.49 (2H, m, CH-Ar); **<sup>19</sup>F{<sup>1</sup>H} NMR (376 MHz, CDCl<sub>3</sub>)**  $\delta_F$ : -66.5 (s, CF<sub>3</sub>); **<sup>13</sup>C{<sup>1</sup>H} NMR (101 MHz, CDCl<sub>3</sub>)**  $\delta_C$ : 14.9 (C(3)CH<sub>3</sub>), 20.2 (C<sub>6</sub>H<sub>4</sub>CH<sub>3</sub>), 30.0 (CH<sub>2</sub>CO), 34.8 (C(4)CH<sub>2</sub>Ph), 44.3 (q,  $^2J_{CF}$  26.8, CF<sub>3</sub>CH), 44.0 (CONHCH<sub>2</sub>Ph), 56.9 (C(4)), 120.5 (2 $\times$ CH-Ar), 125.99 (CH-Ar), 126.0 (CH-Ar), 126.3 (q,  $^1J_{CF}$  282.0, CF<sub>3</sub>), 127.6 (CH-Ar), 127.7 (3 $\times$ CH-Ar), 128.6 (CH-Ar), 128.7 (2 $\times$ CH-Ar), 128.9 (2 $\times$ CH-Ar), 130.9 (CH-Ar), 131.8 (C-Ar), 136.5 (C-Ar), 137.1 (C-Ar), 137.9 (C-Ar), 160.8 (C(3)), 169.8 (NHC=O), 173.3 (C(5)=O); **HRMS (NSI<sup>+</sup>)** C<sub>29</sub>H<sub>29</sub>F<sub>3</sub>N<sub>3</sub>O<sub>2</sub> [M+H]<sup>+</sup> found 508.2201, requires 508.2206 (-1.1 ppm).

(*S*)-*N*-benzyl-4,4,4-trifluoro-3-((*S*)-3-methyl-4-(3-methylbenzyl)-5-oxo-1-phenyl-4,5-dihydro-1*H*-pyrazol-4-yl)butanamide (**32**<sub>major</sub>) and (*S*)-*N*-benzyl-4,4,4-trifluoro-3-((*R*)-3-methyl-4-(3-methylbenzyl)-5-oxo-1-phenyl-4,5-dihydro-1*H*-pyrazol-4-yl)butanamide (**32**<sub>minor</sub>)

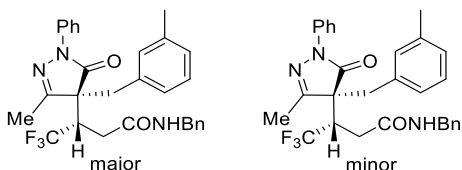

Following General Procedure 7, pyrazol-one (55.6 mg, 0.2 mmol), 4-nitrophenyl (*E*)-4,4,4-trifluorobut-2-enoate (52.2 mg, 0.2 mmol) and (2*S*,3*R*)-HyperBTM (12.3 mg, 0.04 mmol) in THF at 0 °C for 48 h. Benzyl amine (109  $\mu$ L, 1.0 mmol) was added and the reaction stirred at room temperature for 16 h. The crude product (67:33 dr) was purified by flash silica chromatography (67:33 Petrol : EtOAc,  $R_f$  0.43<sub>major</sub> and 0.67<sub>minor</sub>) to give:

**32**<sub>major</sub> (58.0 mg, 57 %) as a pale-yellow solid. mp 127–128 °C;  $[\alpha]_D^{20} = -86.8$  ( $c$  1.0, CHCl<sub>3</sub>); Chiral HPLC analysis, Chiralpak AD-H (90:10 hexane : IPA, flow rate 1 mLmin<sup>-1</sup>, 254 nm, 30 °C)  $t_R$  (major): 15.8 min,  $t_R$  (minor): 21.4 min, 95:5 e<sub>s</sub>;  $v_{max}$  (film) 3310 (N-H), 2957, 2926 (C-H), 1699 (C=O, amide), 1684 (C=N), 1647 (C=O, lactam), 1167, 1134, 1121 (C-F); <sup>1</sup>H NMR (400 MHz, CDCl<sub>3</sub>)  $\delta_H$ : 2.14 (3H, s, C<sub>6</sub>H<sub>4</sub>CH<sub>3</sub>), 2.26 (3H, s, C(3)CH<sub>3</sub>), 2.62 (1H, dd,  $J$  16.2, 4.8, CH<sup>A</sup>H<sup>B</sup>CO), 2.70 (1H, dd,  $J$  16.2, 6.6, CH<sup>A</sup>H<sup>B</sup>CO), 3.04 (1H, d,  $J$  13.0, C(4)CH<sup>A</sup>H<sup>B</sup>Ar), 3.25 (1H, d,  $J$  13.0, C(4)CH<sup>A</sup>H<sup>B</sup>Ar), 3.83–3.92 (1H, m, CF<sub>3</sub>CH), 4.41–4.52 (2H, m, CONHCH<sub>2</sub>Ph), 6.52 (1H, t,  $J$  5.7, NH), 6.85–6.88 (2H, m, CH-Ar), 6.95–6.97 (1H, m, CH-Ar), 7.02–7.06 (1H, m, CH-Ar), 7.13–7.17 (1H, m, CH-Ar), 7.25–7.33 (7H, m, CH-Ar), 7.43–7.46 (2H, m, CH-Ar); <sup>19</sup>F{<sup>1</sup>H} NMR (376 MHz, CDCl<sub>3</sub>)  $\delta_F$ : -65.6 (s, CF<sub>3</sub>); <sup>13</sup>C{<sup>1</sup>H} NMR (101 MHz, CDCl<sub>3</sub>)  $\delta_C$ : 15.8 (C(3)CH<sub>3</sub>), 21.2 (ArCH<sub>3</sub>), 31.8 (CH<sub>2</sub>CO), 38.9 (C(4)CH<sub>2</sub>Ph), 43.6 (q, <sup>2</sup> $J_{CF}$  26.3, CF<sub>3</sub>CH), 44.1 (CONHCH<sub>2</sub>Ph), 59.5 (C(4)), 119.8 (2 $\times$ CH-Ar), 125.6 (N(1)PhC(4)), 126.4 (C(4)CH<sub>2</sub>ArC(2)), 126.6 (q, <sup>1</sup> $J_{CF}$  281.7, CF<sub>3</sub>), 127.7 (C(4)CH<sub>2</sub>ArC(5)), 127.8 (2 $\times$ CH-Ar), 128.1 (CH-Ar), 128.5 (CH-Ar), 128.7 (2 $\times$ CH-Ar), 128.8 (2 $\times$ CH-Ar), 130.1 (CH-Ar), 132.6 (C-Ar), 137.0 (C-Ar), 137.7 (C-Ar), 137.9 (C-Ar), 158.8 (C(3)), 168.7 (NHC=O), 172.9 (C(5)=O); HRMS (NSI<sup>+</sup>) C<sub>29</sub>H<sub>29</sub>F<sub>3</sub>N<sub>3</sub>O<sub>2</sub> [M+H]<sup>+</sup> found 508.2199, requires 508.2206 (-1.5 ppm).

**32**<sub>minor</sub> (31.7 mg, 31 %) as a pale-yellow solid. mp 153–154 °C;  $[\alpha]_D^{20} = +142.4$  ( $c$  1.5, CHCl<sub>3</sub>); Chiral HPLC analysis, Chiralpak AD-H (93:7 hexane : IPA, flow rate 1 mLmin<sup>-1</sup>, 254 nm, 30 °C)  $t_R$  (minor): 22.3 min,  $t_R$  (major): 26.1 min, 96:4 e<sub>r</sub>;  $v_{max}$  (film) 3310 (N-H), 2926 (C-H), 1701 (C=O, amide), 1684 (C=N), 1645 (C=O, lactam), 1265, 1165, 1117 (C-F); <sup>1</sup>H NMR (400 MHz, CDCl<sub>3</sub>)  $\delta_H$ : 2.15 (3H, s, C<sub>6</sub>H<sub>4</sub>CH<sub>3</sub>), 2.19 (3H, s, C(3)CH<sub>3</sub>), 2.73 (1H, dd,  $J$  17.1, 5.6, CH<sup>A</sup>H<sup>B</sup>CO), 2.96 (1H, d,  $J$  13.1, C(4)CH<sup>A</sup>H<sup>B</sup>Ar), 3.30 (1H, d,  $J$  13.1, C(4)CH<sup>A</sup>H<sup>B</sup>Ar), 3.55 (1H, dd,  $J$  17.1, 5.6, CH<sup>A</sup>H<sup>B</sup>CO), 3.74–3.83 (1H, m, CF<sub>3</sub>CH), 4.45–4.55 (2H, m, CONHCH<sub>2</sub>Ph), 6.13 (1H, t,  $J$  5.7, NH), 6.85–6.87 (2H, m, CH-Ar), 6.99–7.00 (1H, m, CH-Ar), 7.05–7.08 (1H, m, CH-Ar), 7.17–7.21 (1H, m, CH-Ar), 7.27–7.37 (7H, m, CH-Ar), 7.51–7.53 (2H, m, CH-Ar); <sup>19</sup>F{<sup>1</sup>H} NMR (376 MHz, CDCl<sub>3</sub>)  $\delta_F$ : -66.6 (s, CF<sub>3</sub>); <sup>13</sup>C{<sup>1</sup>H} NMR (101 MHz, CDCl<sub>3</sub>)  $\delta_C$ : 14.9 (C(3)CH<sub>3</sub>), 21.2 (ArCH<sub>3</sub>), 29.8 (CH<sub>2</sub>CO), 39.5 (C(4)CH<sub>2</sub>Ph), 43.9 (q, <sup>2</sup> $J_{CF}$  26.1, CF<sub>3</sub>CH), 44.2 (CONHCH<sub>2</sub>Ph), 57.1 (C(4)), 120.1 (2 $\times$ CH-Ar), 125.7 (CH-Ar), 126.2 (CH-Ar), 126.3 (q, <sup>1</sup> $J_{CF}$  281.1, CF<sub>3</sub>), 127.7 (CH-Ar), 127.8 (2 $\times$ CH-Ar), 128.3 (CH-Ar), 128.5 (CH-Ar), 128.7 (2 $\times$ CH-Ar), 128.8 (2 $\times$ CH-Ar), 129.8 (CH-Ar), 132.7 (C-Ar), 137.1 (C-Ar), 137.6 (C-Ar), 138.1 (C-Ar), 160.5 (C(3)), 169.6 (NHC=O), 172.9 (C(5)=O); HRMS (NSI<sup>+</sup>) C<sub>29</sub>H<sub>29</sub>F<sub>3</sub>N<sub>3</sub>O<sub>2</sub> [M+H]<sup>+</sup> found 508.2201, requires 508.2206 (-1.1 ppm).

(*S*)-*N*-benzyl-4,4,4-trifluoro-3-((*S*)-4-(4-chlorobenzyl)-3-methyl-5-oxo-1-phenyl-4,5-dihydro-1*H*-pyrazol-4-yl)butanamide (**33**<sub>major</sub>) and (*S*)-*N*-benzyl-4,4,4-trifluoro-3-((*R*)-4-(4-chlorobenzyl)-3-methyl-5-oxo-1-phenyl-4,5-dihydro-1*H*-pyrazol-4-yl)butanamide (**33**<sub>minor</sub>)

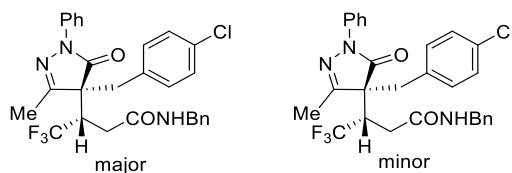

Following General Procedure 7, 4-(4-chlorobenzyl)-5-methyl-2-phenyl-2,4-dihydro-3*H*-pyrazol-3-one (59.8 mg, 0.2 mmol), 4-nitrophenyl (*E*)-4,4,4-trifluorobut-2-enoate (52.2 mg, 0.2 mmol) and (*2S,3R*)-HyperBTM (12.3 mg, 0.04 mmol) in THF at 0 °C for 24 h. Benzyl amine (109  $\mu$ L, 1.0 mmol) was added and the reaction stirred at room temperature for 16 h. The crude product (66:34 dr) was purified by flash silica chromatography (67:33 Petrol : EtOAc,  $R_f$  0.32<sub>major</sub> and 0.60<sub>minor</sub>) to give:

**33**<sub>major</sub> (56.7 mg, 54 %) as a white solid. mp 119–120 °C;  $[\alpha]_D^{20} = -99.3$  ( $c$  1.0,  $\text{CHCl}_3$ ); Chiral HPLC analysis, Chiralcel OD-H (90:10 hexane : IPA, flow rate 1 mLmin<sup>-1</sup>, 254 nm, 30 °C)  $t_R$  (minor): 19.0 min,  $t_R$  (major): 34.1 min, 94:6 er;  $v_{\max}$  (film) 3310 (N-H), 2959, 2928 (C-H), 1697 (C=O, amide), 1684 (C=N), 1647 (C=O, lactam), 1167, 1135, 1123 (C-F); **<sup>1</sup>H NMR (400 MHz, CDCl<sub>3</sub>)**  $\delta_H$ : 2.27 (3H, s, C(3)CH<sub>3</sub>), 2.58 (1H, dd,  $J$  16.2, 4.8, CH<sup>A</sup>H<sup>B</sup>CO), 2.68 (1H, dd,  $J$  16.2, 6.5, CH<sup>A</sup>H<sup>B</sup>CO), 3.03 (1H, d,  $J$  13.1, C(4)CH<sup>A</sup>H<sup>B</sup>Ar), 3.25 (1H, d,  $J$  13.1, C(4)CH<sup>A</sup>H<sup>B</sup>Ar), 3.80–3.90 (1H, m, CF<sub>3</sub>CH), 4.39–4.55 (2H, m, CONHCH<sub>2</sub>Ph), 6.30 (1H, t,  $J$  5.7, NH), 6.97–7.01 (2H, m, CH-Ar), 7.11–7.14 (2H, m, CH-Ar), 7.15–7.19 (1H, m, CH-Ar), 7.25–7.35 (7H, m, CH-Ar), 7.42–7.45 (2H, m, CH-Ar); **<sup>19</sup>F{<sup>1</sup>H} NMR (376 MHz, CDCl<sub>3</sub>)**  $\delta_F$ : -65.5 (s, CF<sub>3</sub>); **<sup>13</sup>C{<sup>1</sup>H} NMR (101 MHz, CDCl<sub>3</sub>)**  $\delta_C$ : 15.8 (C(3)CH<sub>3</sub>), 31.8 (CH<sub>2</sub>CO), 38.0 (C(4)CH<sub>2</sub>Ph), 43.6 (q,  $^2J_{CF}$  26.4, CF<sub>3</sub>CH), 44.2 (CONHCH<sub>2</sub>Ph), 59.4 (C(4)), 119.7 (2 $\times$ CH-Ar), 125.9 (CH-Ar), 126.5 (q,  $^1J_{CF}$  281.7, CF<sub>3</sub>), 127.81 (CH-Ar), 127.84 (2 $\times$ CH-Ar), 128.5 (2 $\times$ CH-Ar), 128.8 (2 $\times$ CH-Ar), 128.9 (2 $\times$ CH-Ar), 130.8 (2 $\times$ CH-Ar), 131.2 (C-Ar), 133.8 (C-Ar), 136.8 (C-Ar), 137.6 (C-Ar), 158.4 (C(3)), 168.4 (NHC=O), 172.5 (C(5)=O); **HRMS (NSI<sup>+</sup>)** C<sub>28</sub>H<sub>26</sub>ClF<sub>3</sub>N<sub>3</sub>O<sub>2</sub> [M+H]<sup>+</sup> found 528.1654, requires 528.1660 (-1.2 ppm).

**33**<sub>minor</sub> (36.5 mg, 35 %) as a white solid. mp 90–92 °C;  $[\alpha]_D^{20} = +50.8$  ( $c$  0.5,  $\text{CHCl}_3$ ); Chiral HPLC analysis, Chiralcel OD-H (97:3 hexane : IPA, flow rate 1 mLmin<sup>-1</sup>, 254 nm, 30 °C)  $t_R$  (major): 23.6 min,  $t_R$  (minor): 47.2 min, 97:3 er;  $v_{\max}$  (film) 3308 (N-H), 2959, 2926 (C-H), 1699 (C=O, amide), 1684 (C=N), 1645 (C=O, lactam), 1265, 1167, 1119 (C-F); **<sup>1</sup>H NMR (400 MHz, CDCl<sub>3</sub>)**  $\delta_H$ : 2.21 (3H, s, C(3)CH<sub>3</sub>), 2.72 (1H, dd,  $J$  17.1, 4.7, CH<sup>A</sup>H<sup>B</sup>CO), 2.98 (1H, d,  $J$  13.3, C(4)CH<sup>A</sup>H<sup>B</sup>Ar), 3.25 (1H, d,  $J$  13.3, C(4)CH<sup>A</sup>H<sup>B</sup>Ar), 3.54 (1H, dd,  $J$  17.1, 5.8, CH<sup>A</sup>H<sup>B</sup>CO), 3.73–3.83 (1H, m, CF<sub>3</sub>CH), 4.49 (2H, d,  $J$  5.7, CONHCH<sub>2</sub>Ph), 6.22 (1H, t,  $J$  5.6, NH), 6.96–6.99 (2H, m, CH-Ar), 7.13–7.16 (2H, m, CH-Ar), 7.19–7.23 (1H, m, CH-Ar), 7.25–7.39 (7H, m, CH-Ar), 7.48–7.51 (2H, m, CH-Ar); **<sup>19</sup>F{<sup>1</sup>H} NMR (376 MHz, CDCl<sub>3</sub>)**  $\delta_F$ : -66.6 (s, CF<sub>3</sub>); **<sup>13</sup>C{<sup>1</sup>H} NMR (101 MHz, CDCl<sub>3</sub>)**  $\delta_C$ : 14.8 (C(3)CH<sub>3</sub>), 29.7 (CH<sub>2</sub>CO), 38.6 (C(4)CH<sub>2</sub>Ph), 43.8 (q,  $^2J_{CF}$  26.3, CF<sub>3</sub>CH), 44.1 (CONHCH<sub>2</sub>Ph), 57.1 (C(4)), 120.1 (2 $\times$ CH-Ar), 126.0 (CH-Ar), 126.2 (q,  $^1J_{CF}$  281.4, CF<sub>3</sub>), 127.8 (3 $\times$ CH-Ar), 128.6 (2 $\times$ CH-Ar), 128.8 (2 $\times$ CH-Ar), 128.9 (2 $\times$ CH-Ar), 130.5 (2 $\times$ CH-Ar), 131.4 (C-Ar), 133.8 (C-Ar), 136.9 (C-Ar), 137.6 (C-Ar) 160.2 (C(3)), 169.5 (NHC=O), 172.6 (C(5)=O); **HRMS (NSI<sup>+</sup>)** C<sub>28</sub>H<sub>26</sub>ClF<sub>3</sub>N<sub>3</sub>O<sub>2</sub> [M+H]<sup>+</sup> found 528.1654, requires 528.1660 (-1.2 ppm).

(*S*)-*N*-benzyl-3-((*S*)-4-(4-cyanobenzyl)-3-methyl-5-oxo-1-phenyl-4,5-dihydro-1*H*-pyrazol-4-yl)-4,4,4-trifluorobutanamide (**34**<sub>major</sub>) and (*S*)-*N*-benzyl-3-((*R*)-4-(4-cyanobenzyl)-3-methyl-5-oxo-1-phenyl-4,5-dihydro-1*H*-pyrazol-4-yl)-4,4,4-trifluorobutanamide (**34**<sub>minor</sub>)

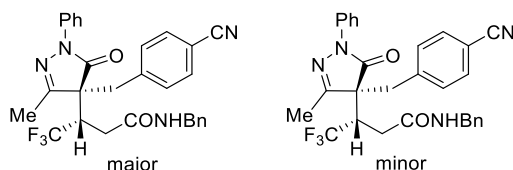

Following General Procedure 7, 4-((3-methyl-5-oxo-1-phenyl-4,5-dihydro-1*H*-pyrazol-4-yl)methyl)benzonitrile (57.9 mg, 0.2 mmol), 4-nitrophenyl (*E*)-4,4,4-trifluorobut-2-enoate (52.2 mg, 0.2 mmol) and (2*S*,3*R*)-HyperBTM (12.3 mg, 0.04 mmol) in THF at 0 °C for 24 h. Benzyl amine (109 μL, 1.0 mmol) was added and the reaction stirred at room temperature for 16 h. The crude product (61:39 dr) was purified by flash silica chromatography (67:33 Petrol : EtOAc,  $R_f$  0.13<sub>major</sub> and 0.22<sub>minor</sub>) to give:

**34**<sub>major</sub> (40.1 mg, 39 %) as a pale-yellow oil.  $[\alpha]_D^{20} = -99.8$  (*c* 0.9, CHCl<sub>3</sub>); Chiral HPLC analysis, Chiralcel OD-H (90:10 hexane : IPA, flow rate 1 mLmin<sup>-1</sup>, 254 nm, 30 °C)  $t_R$  (minor): 41.3 min,  $t_R$  (major): 91.5 min, 92:8 er;  $v_{max}$  (film) 3335 (N-H), 2967, 2934 (C-H), 1699 (C=O, amide), 1684 (C=N), 1647 (C=O, lactam), 1167, 1134, 1121 (C-F); **<sup>1</sup>H NMR (400 MHz, CDCl<sub>3</sub>)**  $\delta_H$ : 2.21 (3H, s, C(3)CH<sub>3</sub>), 2.46 (1H, dd, *J* 16.2, 4.7, CH<sup>A</sup>H<sup>B</sup>CO), 2.59 (1H, dd, *J* 16.2, 6.5, CH<sup>A</sup>H<sup>B</sup>CO), 3.00 (1H, d, *J* 13.0, C(4)CH<sup>A</sup>H<sup>B</sup>Ar), 3.25 (1H, d, *J* 13.0, C(4)CH<sup>A</sup>H<sup>B</sup>Ar), 3.71–3.81 (1H, m, CF<sub>3</sub>CH), 4.33–4.44 (2H, m, CONHCH<sub>2</sub>Ph), 6.01 (1H, t, *J* 5.7, NH), 7.06–7.10 (3H, m, CH-Ar), 7.17–7.26 (7H, m, CH-Ar), 7.31–7.37 (4H, m, CH-Ar); **<sup>19</sup>F{<sup>1</sup>H} NMR (376 MHz, CDCl<sub>3</sub>)**  $\delta_F$ : -65.4 (s, CF<sub>3</sub>); **<sup>13</sup>C{<sup>1</sup>H} NMR (101 MHz, CDCl<sub>3</sub>)**  $\delta_C$ : 15.9 (C(3)CH<sub>3</sub>), 31.9 (CH<sub>2</sub>CO), 38.6 (C(4)CH<sub>2</sub>Ph), 43.5 (q, <sup>2</sup>*J*<sub>CF</sub> 26.8, CF<sub>3</sub>CH), 44.3 (CONHCH<sub>2</sub>Ph), 59.3 (C(4)), 111.8 (CN), 118.4 (C-Ar), 119.4 (2×CH-Ar), 126.4 (q, <sup>1</sup>*J*<sub>CF</sub> 281.9, CF<sub>3</sub>), 126.0 (N(1)PhC(4)), 127.9 (3×CH-Ar), 128.9 (4×CH-Ar), 130.3 (2×CH-Ar), 132.0 (2×CH-Ar), 136.7 (C-Ar), 137.4 (C-Ar), 138.4 (C-Ar), 158.0 (C(3)), 168.2 (NHC=O), 171.9 (C(5)=O); **HRMS (NSI<sup>+</sup>)** C<sub>29</sub>H<sub>26</sub>F<sub>3</sub>N<sub>4</sub>O<sub>2</sub> [M+H]<sup>+</sup> found 519.1996, requires 519.2002 (-1.2 ppm).

**34**<sub>minor</sub> (22.0 mg, 21 %) as a pale-yellow oil.  $[\alpha]_D^{20} = +171.9$  (*c* 1.1, CHCl<sub>3</sub>); Chiral HPLC analysis, Chiralcel OD-H (90:10 hexane : IPA, flow rate 1 mLmin<sup>-1</sup>, 254 nm, 30 °C)  $t_R$  (major): 14.1 min,  $t_R$  (minor): 20.4 min, 96:4 er;  $v_{max}$  (film) 3327 (N-H), 2967, 2934 (C-H), 1699 (C=O, amide), 1684 (C=N), 1653 (C=O, lactam), 1263, 1165, 1117 (C-F); **<sup>1</sup>H NMR (400 MHz, CDCl<sub>3</sub>)**  $\delta_H$ : 2.12 (3H, s, C(3)CH<sub>3</sub>), 2.64 (1H, dd, *J* 17.1, 4.6, CH<sup>A</sup>H<sup>B</sup>CO), 2.97 (1H, d, *J* 13.2, C(4)CH<sup>A</sup>H<sup>B</sup>Ph), 3.20 (1H, d, *J* 13.2, C(4)CH<sup>A</sup>H<sup>B</sup>Ph), 3.44 (1H, dd, *J* 17.1, 5.8, CH<sup>A</sup>H<sup>B</sup>CO), 3.67–3.75 (1H, m, CF<sub>3</sub>CH), 4.35 (1H, dd, *J* 14.7, 5.8, CONHCH<sup>A</sup>H<sup>B</sup>Ph), 4.42 (1H, dd, *J* 14.7, 5.8, CONHCH<sup>A</sup>H<sup>B</sup>Ph), 6.26 (1H, t, *J* 5.8, NH), 7.04–7.07 (2H, m, CH-Ar), 7.11–7.23 (6H, m, CH-Ar), 7.24–7.29 (2H, m, CH-Ar), 7.35–7.37 (4H, m, CH-Ar); **<sup>19</sup>F{<sup>1</sup>H} NMR (376 MHz, CDCl<sub>3</sub>)**  $\delta_F$ : -66.5 (s, CF<sub>3</sub>); **<sup>13</sup>C{<sup>1</sup>H} NMR (101 MHz, CDCl<sub>3</sub>)**  $\delta_C$ : 14.9 (C(3)CH<sub>3</sub>), 29.7 (CH<sub>2</sub>CO), 39.1 (C(4)CH<sub>2</sub>Ph), 43.8 (q, <sup>2</sup>*J*<sub>CF</sub> 26.3, CF<sub>3</sub>CH), 44.2 (CONHCH<sub>2</sub>Ph), 57.0 (C(4)), 111.9 (CN), 118.4 (C-Ar), 119.9 (2×CH-Ar), 126.1 (q, <sup>1</sup>*J*<sub>CF</sub> 281.6, CF<sub>3</sub>), 126.2 (CH-Ar), 127.77 (2×CH-Ar), 127.80 (CH-Ar), 128.8 (2×CH-Ar), 129.0 (2×CH-Ar), 130.1 (2×CH-Ar), 132.2 (2×CH-Ar), 136.7 (C-Ar), 137.6 (C-Ar), 138.5 (C-Ar), 159.8 (C(3)), 169.4 (NHC=O), 172.2 (C(5)=O); **HRMS (NSI<sup>+</sup>)** C<sub>29</sub>H<sub>26</sub>F<sub>3</sub>N<sub>4</sub>O<sub>2</sub> [M+H]<sup>+</sup> found 519.1996, requires 519.2002 (-1.2 ppm).

(*S*)-*N*-benzyl-4,4,4-trifluoro-3-((*R*)-3-methyl-5-oxo-1,4-diphenyl-4,5-dihydro-1*H*-pyrazol-4-yl)butanamide (**35**<sub>major</sub>) and (*S*)-*N*-benzyl-4,4,4-trifluoro-3-((*S*)-3-methyl-5-oxo-1,4-diphenyl-4,5-dihydro-1*H*-pyrazol-4-yl)butanamide (**35**<sub>minor</sub>)

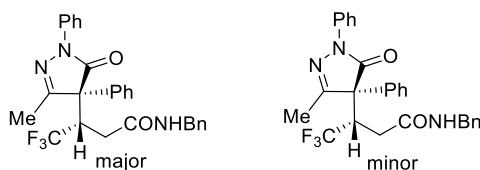

Following General Procedure 7, pyrazol-one (50.0 mg, 0.2 mmol), 4-nitrophenyl (*E*)-4,4,4-trifluorobut-2-enoate (52.2 mg, 0.2 mmol) and (*R*)-BTM (10.7 mg, 0.04 mmol) in THF at 0 °C for 48 h. Benzyl amine (109  $\mu$ L, 1.0 mmol) was added and the reaction stirred at room temperature for 16 h. The crude product (88:12 dr) was purified by flash silica chromatography (67:33 Petrol : EtOAc,  $R_f$  0.28<sub>major</sub> and 0.39<sub>minor</sub>) to give:

**35**<sub>major</sub> (59.8 mg, 54 %) as a white solid. mp 161–163 °C;  $[\alpha]_D^{20} = +157.4$  ( $c$  1.0, CHCl<sub>3</sub>); Chiral HPLC analysis, Chiralcel OD-H (90:10 hexane : IPA, flow rate 1 mLmin<sup>-1</sup>, 254 nm, 30 °C)  $t_R$  (major): 14.9 min,  $t_R$  (minor): 67.9 min, 95:5 er;  $v_{max}$  (film) 3327 (N-H), 2957, 2930 (C-H), 1699 (C=O, amide), 1684 (C=N), 1645 (C=O, lactam), 1161, 1132, 1119 (C-F); **<sup>1</sup>H NMR (400 MHz, CDCl<sub>3</sub>)**  $\delta_H$ : 2.31 (3H, s, C(3)CH<sub>3</sub>), 2.52 (1H, br, CH<sup>A</sup>H<sup>B</sup>CO), 2.54 (1H, br, CH<sup>A</sup>H<sup>B</sup>CO), 4.41 (1H, dd,  $J$  14.6, 5.6, CONHCH<sup>A</sup>H<sup>B</sup>Ph), 4.52 (1H, dd,  $J$  14.6, 5.6, CONHCH<sup>A</sup>H<sup>B</sup>Ph), 4.55–4.62 (1H, m, CF<sub>3</sub>CH), 5.74 (1H, t,  $J$  5.7, NH), 7.17–7.25 (3H, m, CH-Ar), 7.30–7.46 (10H, m, CH-Ar), 7.84–7.86 (2H, m, CH-Ar); **<sup>19</sup>F{<sup>1</sup>H} NMR (376 MHz, CDCl<sub>3</sub>)**  $\delta_F$ : -66.6 (s, CF<sub>3</sub>); **<sup>13</sup>C{<sup>1</sup>H} NMR (101 MHz, CDCl<sub>3</sub>)**  $\delta_C$ : 17.0 (C(3)CH<sub>3</sub>), 32.3 (CH<sub>2</sub>CO), 43.4 (q,  $^2J_{CF}$  26.0, CF<sub>3</sub>CH), 44.1 (CONHCH<sub>2</sub>Ph), 61.6 (C(4)), 119.0 (2 $\times$ CH-Ar), 126.7 (q,  $^1J_{CF}$  282.3, CF<sub>3</sub>), 125.4 (CH-Ar), 126.8 (2 $\times$ CH-Ar), 127.8 (CH-Ar), 127.9 (2 $\times$ CH-Ar), 128.8 (2 $\times$ CH-Ar), 128.87 (2 $\times$ CH-Ar), 128.93 (CH-Ar), 130.0 (2 $\times$ CH-Ar), 133.3 (C-Ar), 137.6(C-Ar), 137.8 (C-Ar), 158.9(C(3)), 168.4(NHC=O), 171.8 (C(5)=O); **HRMS (NSI<sup>+</sup>)** C<sub>27</sub>H<sub>25</sub>F<sub>3</sub>N<sub>3</sub>O<sub>2</sub> [M+H]<sup>+</sup> found 480.1881, requires 480.1893 (-2.6 ppm).

**35**<sub>minor</sub> (12.6 mg, 11 %) as a white solid. mp 182–184 °C;  $[\alpha]_D^{20} = +112.3$  ( $c$  0.5, CHCl<sub>3</sub>); Chiral HPLC analysis, Chiralpak AD-H (95:5 hexane : IPA, flow rate 1 mLmin<sup>-1</sup>, 254 nm, 30 °C)  $t_R$  (major): 29.0 min,  $t_R$  (minor): 51.1 min, 94:6 er;  $v_{max}$  (film) 3292 (N-H), 2926 (C-H), 1684 (C=N), 1653 (C=O, amide), 1647 (C=O, lactam), 1271, 1130, 1121 (C-F); **<sup>1</sup>H NMR (400 MHz, CDCl<sub>3</sub>)**  $\delta_H$ : 2.09 (3H, s, C(3)CH<sub>3</sub>), 2.77–2.88 (2H, m, CH<sub>2</sub>CO), 4.30–4.42 (2H, m, CONHCH<sup>A</sup>H<sup>B</sup>Ph and CF<sub>3</sub>CH), 4.48 (1H, dd,  $J$  14.8, 5.9, CONHCH<sup>A</sup>H<sup>B</sup>Ph), 5.80 (1H, t,  $J$  5.8, NH), 7.18–7.20 (2H, m, CH-Ar), 7.25–7.49 (11H, m, CH-Ar), 7.92–7.95 (2H, m, CH-Ar); **<sup>19</sup>F{<sup>1</sup>H} NMR (376 MHz, CDCl<sub>3</sub>)**  $\delta_F$ : -66.7 (s, CF<sub>3</sub>); **<sup>13</sup>C{<sup>1</sup>H} NMR (101 MHz, CDCl<sub>3</sub>)**  $\delta_C$ : 14.3 (C(3)CH<sub>3</sub>), 31.1 (CH<sub>2</sub>CO), 42.8 (q,  $^2J_{CF}$  26.1, CF<sub>3</sub>CH), 43.9 (CONHCH<sub>2</sub>Ph), 61.3 (C(4)), 119.5 (2 $\times$ CH-Ar), 126.6 (q,  $^1J_{CF}$  281.7, CF<sub>3</sub>), 125.7 (CH-Ar), 127.0 (2 $\times$ CH-Ar), 127.6 (3 $\times$ CH-Ar), 128.7 (2 $\times$ CH-Ar), 128.8 (3 $\times$ CH-Ar), 129.9 (2 $\times$ CH-Ar), 133.8 (C-Ar), 137.6 (C-Ar), 137.7 (C-Ar), 161.0 (C(3)), 169.6 (NHC=O), 172.9 (C(5)=O); **HRMS (NSI<sup>+</sup>)** C<sub>27</sub>H<sub>25</sub>F<sub>3</sub>N<sub>3</sub>O<sub>2</sub> [M+H]<sup>+</sup> found 480.1886, requires 480.1893 (-1.5 ppm).

## 4.2 Data for Michael adducts with 3-monosubstituted oxindoles

### *tert*-Butyl (*R*)-2-oxo-3-phenyl-3-((*S*)-1,1,1-trifluoro-4-(4-nitrophenoxy)-4-oxobutan-2-yl)indoline-1-carboxylate (**13**)

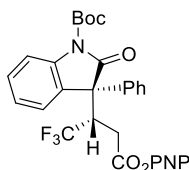

Following General Procedure **9**, *tert*-butyl 2-oxo-3-phenylindoline-1-carboxylate (61.9 mg, 0.2 mmol), 4-nitrophenyl (*E*)-4,4,4-trifluorobut-2-enoate (52.2 mg, 0.2 mmol), (*2S,3R*)-HyperBTM (6.2 mg, 0.02 mmol) and DIPEA (35.0  $\mu$ L, 0.2 mmol) in anhydrous THF (2.0 mL) at room temperature for 24 h. The reaction mixture was concentrated and the crude residue (86:14 dr) was purified by column chromatography (95:5 Petrol : EtOAc,  $R_f$  0.14) afforded the desired compound (70.0 mg, 61%) as white powder. mp: 136–137°C;  $[\alpha]_D^{20} = +161.2$  ( $c$  0.5,  $\text{CHCl}_3$ ); Chiral HPLC analysis, Chiralcel OD-H (95:5 hexane : IPA, flow rate 1 mL/min<sup>-1</sup>, 254 nm, 30 °C)  $t_R$  (major): 9.7 min,  $t_R$  (minor): 13.6 min, 98:2 er;  $v_{\text{max}}$  (film), 1767 (C=O), 1733 (C=O), 1724 (C=O), 1134 (C-F), 1117 (C-F), 1080 (C-F); **<sup>1</sup>H NMR (CDCl<sub>3</sub>, 400 MHz)**  $\delta_H$ : 1.63 (9H, s,  $\text{CO}_2\text{C}(\text{CH}_3)_3$ ), 2.90 (1H, dd,  $J$  16.9, 2.3,  $\text{CH}^A\text{H}^B\text{CO}$ ), 3.10 (1H, dd,  $J$  16.9, 9.4,  $\text{CH}^A\text{H}^B\text{CO}$ ), 4.45–4.54 (1H, m,  $\text{CHCF}_3$ ), 7.20–7.24 (2H, m,  $\text{CH-Ar}_{\text{PNP}}$ ), 7.33–7.41 (7H, m,  $\text{CH-Ar}$ ), 7.50–7.55 (1H, m,  $\text{CH-Ar}$ ), 8.07 (1H, d,  $J$  8.2,  $\text{CH-Ar}$ ), 8.27–8.31 (2H, m,  $\text{CH-Ar}_{\text{PNP}}$ ); **<sup>19</sup>F{<sup>1</sup>H} NMR (376 MHz, CDCl<sub>3</sub>)**  $\delta_F$ : -65.9 (s,  $\text{CF}_3$ ); **<sup>13</sup>C NMR (CDCl<sub>3</sub>, 100 MHz)**  $\delta_C$ : 28.0 ( $\text{CO}_2\text{C}(\text{CH}_3)_3$ ), 31.3 ( $\text{CH}_2\text{CO}$ ), 47.0 (q,  $^2J_{\text{C-F}}$  25.1,  $\text{CHCF}_3$ ), 55.8 ( $\text{C}(3)$ ), 84.9 ( $\text{CO}_2\text{C}(\text{CH}_3)_3$ ), 116.1 ( $\text{CH-Ar}$ ), 122.3 (2 $\times$  $\text{CH-Ar}$ ), 124.3 ( $\text{CH-Ar}$ ), 125.3 (3 $\times$  $\text{CH-Ar}$ ), 126.1 ( $\text{CH-Ar}$ ), 126.2 (q,  $^1J_{\text{C-F}}$  280.6,  $\text{CF}_3$ ), 127.8 (2 $\times$  $\text{CH-Ar}$ ), 128.9 ( $\text{CH-Ar}$ ), 129.4 (2 $\times$  $\text{CH-Ar}$ ), 129.8 ( $\text{CH-Ar}$ ), 136.1 ( $\text{C-Ar}$ ), 140.1 ( $\text{C-Ar}$ ), 145.6 ( $\text{C-NO}_2$ ), 148.9 ( $\text{CO}_2\text{C}(\text{CH}_3)_3$ ), 154.9 ( $\text{CO}_2\text{C-Ar}_{\text{PNP}}$ ), 168.2 ( $\text{CON}$ ), 172.3 ( $\text{CO}_2\text{PNP}$ ); **HRMS (NSI<sup>+</sup>)** exact mass calcd. For  $\text{C}_{29}\text{H}_{29}\text{F}_3\text{N}_3\text{O}_7^+$  ( $\text{M}+\text{NH}_4^+$ ) requires  $m/z$  588.1952, found  $m/z$  588.1947 (-0.9 ppm).

### (*S*)-*N*-benzyl-4,4,4-trifluoro-3-((*R*)-1-methyl-2-oxo-3-phenylindolin-3-yl)butanamide (**53**)

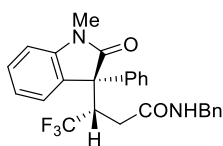

Following General Procedure, 1-methyl-3-phenylindolin-2-one (44.7 mg, 0.2 mmol), 4-nitrophenyl (*E*)-4,4,4-trifluorobut-2-enoate (52.2 mg, 0.2 mmol), (*2S,3R*)-HyperBTM (6.2 mg, 0.02 mmol) and DIPEA (35.0  $\mu$ L, 0.2 mmol) in anhydrous THF (2.0 mL) at room temperature for 48 h. Benzyl amine (109  $\mu$ L, 5.0 mmol) was added and the reaction was stirred at room temperature overnight. The crude residue (>95:5 dr) was purified by flash silica chromatography (8:1 Petrol : EtOAc,  $R_f$  0.12) to give desired compound (72.0 mg, 80%) as a white solid. mp: 68–70°C;  $[\alpha]_D^{20} = +229.8$  ( $c$  0.5,  $\text{CHCl}_3$ ); Chiral HPLC analysis, Chiralcel OD-H (93:7 hexane : IPA, flow rate 1 mL/min<sup>-1</sup>, 254 nm, 30 °C)  $t_R$  (major): 26.1 min,  $t_R$  (minor): 39.4 min, 98:2 er;  $v_{\text{max}}$  (film), 3300 (N-H), 1713 (C=O), 1643 (C=O), 1150 (C-F), 1132 (C-F), 1107 (C-F); **<sup>1</sup>H NMR (CDCl<sub>3</sub>, 400 MHz)**  $\delta_H$ : 2.47–2.58 (2H, m,  $\text{CH}_2\text{CO}$ ), 3.11 (3H, s,  $\text{NCH}_3$ ), 4.24 (1H, dd,  $J$  14.7, 5.8,  $\text{NHCH}_2\text{Ph}$ ), 4.39 (1H, dd,  $J$  14.7, 5.8,  $\text{NHCH}_2\text{Ph}$ ), 4.43–4.51 (1H, m,  $\text{CHCF}_3$ ), 5.65 (1H, t,  $J$  5.1  $\text{NHCH}_2\text{Ph}$ ), 6.91 (1H, d,  $J$  7.8,  $\text{CH-Ar}$ ), 7.10 (1H, t,  $J$  7.6,  $\text{CH-Ar}$ ), 7.14–7.16 (2H, m,  $\text{CH-Ar}$ ), 7.20–7.29 (7H, m,  $\text{CH-Ar}$ ), 7.37–7.44 (3H, m,  $\text{CH-Ar}$ ); **<sup>19</sup>F{<sup>1</sup>H} NMR (376 MHz, CDCl<sub>3</sub>)**  $\delta_F$ : -66.0



(s,  $CF_3$ );  $^{13}C$  NMR ( $CDCl_3$ , 100 MHz)  $\delta_C$ : 26.7 (NCH<sub>3</sub>), 32.8 (CH<sub>2</sub>CO), 44.0 (CH<sub>2</sub>Ph), 46.2 (q,  $^2J_{C-F}$  24.6, CHCF<sub>3</sub>), 55.7 (C(3)), 109.1 (CH-Ar), 122.2 (CH-Ar), 126.3 (CH-Ar), 126.6 (CH-Ar), 125.2 (q,  $^1J_{C-F}$  280.5, CF<sub>3</sub>), 127.3 (CH-Ar), 127.6 (CH-Ar), 127.7 (2×CH-Ar), 127.9 (2×CH-Ar), 128.3 (CH-Ar), 128.7 (2×CH-Ar), 129.0 (2×CH-Ar), 129.2 (CH-Ar), 129.3 (C-Ar), 136.8 (C-Ar), 137.8 (C-Ar), 144.1 (C-Ar), 169.0 (CON), 176.3 (CONHBn); HRMS (NSI<sup>+</sup>) exact mass calcd. For C<sub>26</sub>H<sub>24</sub>F<sub>3</sub>N<sub>2</sub>O<sub>2</sub><sup>+</sup> (M+H<sup>+</sup>) requires m/z 453.1784, found m/z 453.1779 (-1.1 ppm).

#### 4-Nitrophenyl (S)-3-((R)-1-benzyl-2-oxo-3-phenylindolin-3-yl)-4,4,4-trifluorobutanoate (54)

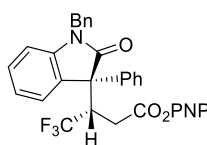

Following General Procedure 9, 1-benzyl-3-phenylindolin-2-one (59.9 mg, 0.2 mmol), 4-nitrophenyl (*E*)-4,4,4-trifluorobut-2-enoate (52.2 mg, 0.2 mmol), (2*S*,3*R*)-HyperBTM (6.2 mg, 0.02 mmol) and DIPEA (35.0  $\mu$ L, 0.2 mmol) in anhydrous THF (2.0 mL) at room temperature for 48 h. The reaction mixture was concentrated and the crude residue (>95:5 dr) was purified by column chromatography (95:5 Petrol : EtOAc,  $R_f$  0.12) afforded the desired compound (82.8 mg, 74%) as a white solid. mp: 156–157°C;  $[\alpha]_D^{20} = +224.8$  (c 0.5,  $CHCl_3$ ); Chiral HPLC analysis, Chiralcel AS-H (96.5:3.5 hexane : IPA, flow rate 1 mL/min<sup>-1</sup>, 254 nm, 30 °C)  $t_R$  (major): 20.2 min,  $t_R$  (minor): 26.6 min, 98.5:1.5 er;  $v_{max}$  (film), 2924 (C-H), 1763 (C=O), 1718 (C=O), 1140 (C-F), 1121 (C-F);  $^1H$ NMR ( $CDCl_3$ , 400 MHz)  $\delta_H$ : 2.95 (1H, dd,  $J$  13.5, 2.0,  $CH^A H^B CO$ ), 3.13 (1H, dd,  $J$  13.4, 7.5,  $CH^A H^B CO$ ), 4.49–4.53 (1H, m,  $CHCF_3$ ), 4.88 (1H, d,  $J$  12.6,  $CH_2Ph$ ), 4.93 (1H, d,  $J$  12.6,  $CH_2Ph$ ), 6.88 (1H, d,  $J$  6.3,  $CH-Ar$ ), 7.19–7.25 (5H, m,  $CH-Ar$ ), 7.26–7.31 (3H, m,  $CH-Ar$ ), 7.35–7.42 (5H, m,  $CH-Ar$ ), 7.50 (2H, d,  $J$  5.0,  $CH-Ar$ ), 8.28–8.31 (2H, m,  $CH-Ar_{PNP}$ );  $^{19}F$ { $^1H$ } NMR (376 MHz,  $CDCl_3$ )  $\delta_F$ : -65.9 (s,  $CF_3$ );  $^{13}C$  NMR ( $CDCl_3$ , 100 MHz)  $\delta_C$ : 31.3 (CH<sub>2</sub>CO), 44.4 (CH<sub>2</sub>Ph), 46.4 (q,  $^2J_{C-F}$  20.3, CHCF<sub>3</sub>), 55.5 (C(3)), 110.5 (CH-Ar), 122.3 (2×CH-Ar), 122.5 (CH-Ar), 125.3 (2×CH-Ar), 126.3 (q,  $^1J_{C-F}$  224.4, CF<sub>3</sub>), 126.5 (2×CH-Ar), 127.2 (CH-Ar), 127.4 (CH-Ar), 127.6 (2×CH-Ar), 127.7 (CH-Ar), 128.7 (CH-Ar), 128.8 (2×CH-Ar), 129.3 (2×CH-Ar), 129.5 (CH-Ar), 135.3 (C-Ar), 136.7 (C-Ar), 143.1 (C-Ar), 145.6 (C-NO<sub>2</sub>), 154.9 (CO<sub>2</sub>C-Ar<sub>PNP</sub>), 168.3 (CON), 176.1 (COOPNP); HRMS (NSI<sup>+</sup>) exact mass calcd. For C<sub>31</sub>H<sub>24</sub>F<sub>3</sub>N<sub>2</sub>O<sub>5</sub><sup>+</sup> (M+H<sup>+</sup>) requires m/z 561.1632, found m/z 561.1622 (-17.8 ppm).

#### (S)-N-benzyl-3-((R)-1-benzyl-2-oxo-3-phenylindolin-3-yl)-4,4,4-trifluorobutanamide (55)

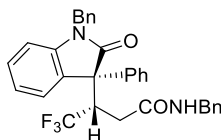

Following General Procedure 9, 1-benzyl-3-phenylindolin-2-one (59.9 mg, 0.2 mmol), 4-nitrophenyl (*E*)-4,4,4-trifluorobut-2-enoate (52.2 mg, 0.2 mmol), (2*S*,3*R*)-HyperBTM (6.2 mg, 0.02 mmol) and DIPEA (35.0  $\mu$ L, 0.2 mmol) in anhydrous THF (2.0 mL) at room temperature for 48 h. Benzyl amine (109  $\mu$ L, 1.0 mmol) was added and the reaction was stirred at room temperature overnight. The crude residue (>95:5 dr) was purified by flash silica chromatography (6:1 Petrol : EtOAc,  $R_f$  0.13) to give desired compound (91.0 mg, 86%) as a white solid. mp: 62–63°C;  $[\alpha]_D^{20} = +147.0$  (c 0.5,  $CHCl_3$ ); Chiral HPLC analysis, Chiralcel OD-H (93:7 hexane : IPA, flow rate 1 mL/min<sup>-1</sup>, 254 nm, 30 °C)  $t_R$  (major): 34.5 min,  $t_R$  (minor): 48.7 min, >99:1 er;  $v_{max}$  (film), 3314 (N-H), 1715 (C=O), 1651 (C=O), 1188 (C-F),

1149 (C-F), 1115 (C-F); **<sup>1</sup>H NMR (CDCl<sub>3</sub>, 400 MHz)** δ<sub>H</sub>: 2.57–2.67 (2H, m, CH<sub>2</sub>CO), 4.32 (1H, dd, *J* 14.6, 5.8, NHCH<sub>2</sub>Ph), 4.47 (1H, dd, *J* 14.6, 5.8, NHCH<sub>2</sub>Ph), 4.59–4.67 (1H, m, CHCF<sub>3</sub>), 4.87 (2H, s, CH<sub>2</sub>Ph), 5.60–5.63 (1H, m, NHCH<sub>2</sub>Ph), 6.83 (1H, d, *J* 7.8, CH-Ar), 7.17–7.37 (17H, m, CH-Ar), 7.46 (2H, d, *J* 6.6, CH-Ar); **<sup>19</sup>F{<sup>1</sup>H} NMR (376 MHz, CDCl<sub>3</sub>)** δ<sub>F</sub>: –65.6 (s, CF<sub>3</sub>); **<sup>13</sup>C NMR (CDCl<sub>3</sub>, 100 MHz)** δ<sub>C</sub>: 32.9 (CH<sub>2</sub>CO), 44.0 (CH<sub>2</sub>Ph), 44.3 (CH<sub>2</sub>Ph), 45.9 (q, <sup>2</sup>*J*<sub>C-F</sub> 24.7, CHCF<sub>3</sub>), 55.8 (C(3)), 110.2 (CH-Ar), 122.2 (2×CH-Ar), 126.3 (CH-Ar), 126.7 (q, <sup>1</sup>*J*<sub>C-F</sub> 280.5, CF<sub>3</sub>), 127.2 (2×CH-Ar), 127.4 (CH-Ar), 127.6 (CH-Ar), 127.7 (2×CH-Ar), 127.9 (2×CH-Ar), 128.3 (CH-Ar), 128.7 (4×CH-Ar), 129.0 (2×CH-Ar), 129.2 (CH-Ar), 135.5 (C-Ar), 137.2 (C-Ar), 137.7 (C-Ar), 143.2 (C-Ar), 168.9 (CON), 176.4 (CONHBn); **HRMS (NSI<sup>+</sup>)** exact mass calcd. For C<sub>32</sub>H<sub>28</sub>F<sub>3</sub>N<sub>2</sub>O<sub>2</sub><sup>+</sup> (M+H<sup>+</sup>) requires *m/z* 529.2097, found *m/z* 529.2086 (–2.1 ppm).

**(R)-1-Benzyl-3-phenyl-3-((S)-1,1,1-trifluoro-4-oxo-4-(pyrrolidin-1-yl)butan-2-yl)indolin-2-one (56)**

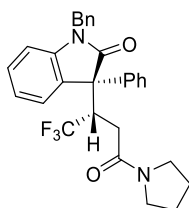

Following General Procedure **9**, 1-benzyl-3-phenylindolin-2-one (59.9 mg, 0.2 mmol), 4-nitrophenyl (*E*)-4,4,4-trifluorobut-2-enoate (52.2 mg, 0.2 mmol), (2*S*,3*R*)-HyperBTM (6.2 mg, 0.02 mmol) and DIPEA (35.0 μL, 0.2 mmol) in anhydrous THF (2.0 mL) at room temperature for 48 h. Pyrrolidine (82 μL, 1.0 mmol) was added and the reaction was stirred at room temperature overnight. The crude residue (>95:5 dr) was purified by flash silica chromatography (6:1 to 2:1 Petrol : EtOAc, R<sub>f</sub> 0.12) to give desired compound (80.0 mg, 81%) as a white solid. mp: 125–126°C; [α]<sub>D</sub><sup>20</sup> = +145.4 (*c* 0.5, CHCl<sub>3</sub>); Chiral HPLC analysis, Chiralcel OD-H (90:10 hexane : IPA, flow rate 1 mL/min<sup>-1</sup>, 254 nm, 30 °C) t<sub>R</sub> (major): 22.2 min, t<sub>R</sub> (minor): 14.3 min, 98:2 er; v<sub>max</sub> (film), 2876 (C-H), 1715 (C=O), 1639 (C=O), 1188 (C-F), 1150 (C-F), 1113 (C-F); **<sup>1</sup>H NMR (CDCl<sub>3</sub>, 400 MHz)** δ<sub>H</sub>: 1.74–1.92 (4H, m, CH<sub>2</sub>(pyrr)), 2.53 (1H, dd, *J* 16.1, 2.7, CH<sub>2</sub>CO), 2.77 (1H, q, *J* 7.7, CH<sub>2</sub>CO), 3.05–3.11 (1H, m, CH<sub>2</sub>(pyrr)), 3.32–3.39 (2H, m, CH<sub>2</sub>(pyrr)), 3.44–3.50 (1H, m, CH<sub>2</sub>(pyrr)), 4.74–4.79 (1H, m, CHCF<sub>3</sub>), 4.86 (1H, d, *J* 15.8, CH<sub>2</sub>Ph), 4.91 (1H, d, *J* 15.8, CH<sub>2</sub>Ph), 6.83 (1H, d, *J* 7.8, CH-Ar), 7.13–7.19 (3H, m, CH-Ar), 7.23–7.37 (8H, m, CH-Ar), 7.46 (2H, d, *J* 6.9, CH-Ar); **<sup>19</sup>F{<sup>1</sup>H} NMR (376 MHz, CDCl<sub>3</sub>)** δ<sub>F</sub>: –65.8 (s, CF<sub>3</sub>); **<sup>13</sup>C NMR (CDCl<sub>3</sub>, 100 MHz)** δ<sub>C</sub>: 24.3 (CH<sub>2</sub>(pyrr)), 25.9 (CH<sub>2</sub>(pyrr)), 30.7 (CH<sub>2</sub>CO), 44.3 (CH<sub>2</sub>Ph), 45.4 (q, <sup>2</sup>*J*<sub>C-F</sub> 25.2, CHCF<sub>3</sub>), 46.0 (CH<sub>2</sub>(pyrr)), 46.4 (CH<sub>2</sub>(pyrr)), 56.0 (C(3)), 110.1 (CH-Ar), 122.2 (CH-Ar), 126.2 (CH-Ar), 126.9 (q, <sup>1</sup>*J*<sub>C-F</sub> 280.3, CF<sub>3</sub>), 127.2 (2×CH-Ar), 127.6 (CH-Ar), 127.7 (CH-Ar), 127.9 (CH-Ar), 128.2 (CH-Ar), 128.7 (2×CH-Ar), 128.8 (2×CH-Ar), 129.1 (CH-Ar), 135.6 (C-Ar), 137.2 (C-Ar), 137.7 (C-Ar), 143.2 (C-Ar), 167.4 (CON), 176.5 (CONHBn); **HRMS (NSI<sup>+</sup>)** exact mass calcd. For C<sub>29</sub>H<sub>28</sub>F<sub>3</sub>N<sub>2</sub>O<sub>2</sub><sup>+</sup> (M+H<sup>+</sup>) requires *m/z* 493.2097, found *m/z* 493.2085 (–2.4 ppm).

**(R)-1-Benzyl-3-phenyl-3-((S)-1,1,1-trifluoro-4-morpholino-4-oxobutan-2-yl)indolin-2-one (57)**

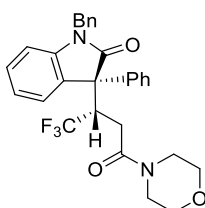

Following General Procedure **9**, 1-benzyl-3-phenylindolin-2-one (59.9 mg, 0.2 mmol), 4-nitrophenyl (*E*)-4,4,4-trifluorobut-2-enoate (52.2 mg, 0.2 mmol), (2*S*,3*R*)-HyperBTM (6.2 mg, 0.02 mmol) and DIPEA (35.0  $\mu$ L, 0.2 mmol) in anhydrous THF (2.0 mL) at room temperature for 48 h. Morpholine (87  $\mu$ L, 1.0 mmol) was added and the reaction was stirred at room temperature overnight. The crude residue (>95:5 dr) was purified by flash silica chromatography (5:1 to 2:1 Petrol : EtOAc,  $R_f$  0.16) to give desired compound (76.0 mg, 75%) as a white solid. mp: 145–146°C;  $[\alpha]_D^{20} = +220.4$  (*c* 0.5, CHCl<sub>3</sub>); Chiral HPLC analysis, Chiralcel OD-H (93:7 hexane : IPA, flow rate 1 mL/min<sup>-1</sup>, 254 nm, 30 °C)  $t_R$  (major): 34.3 min,  $t_R$  (minor): 30.5 min, 98.5:1.5 er;  $v_{max}$  (film), 2852 (C-H), 1713 (C=O), 1643 (C=O), 1188 (C-F), 1152 (C-F), 1111 (C-F); **<sup>1</sup>H NMR (CDCl<sub>3</sub>, 400 MHz)**  $\delta_H$ : 2.46 (1H, dd, *J* 16.2, 2.0, CH<sub>2</sub>CO), 2.81 (1H, q, *J* 8.0, CH<sub>2</sub>CO), 3.17–3.61 (8H, m, CH<sub>2(morph)</sub>), 4.69–4.78 (1H, m, CHCF<sub>3</sub>), 4.81 (1H, d, *J* 15.9, CH<sub>2</sub>Ph), 4.86 (1H, d, *J* 15.8, CH<sub>2</sub>Ph), 6.79 (1H, d, *J* 7.8, CH-Ar), 7.09–7.15 (3H, m, CH-Ar), 7.19–7.32 (8H, m, CH-Ar), 7.40 (2H, d, *J* 6.0, CH-Ar); **<sup>19</sup>F{<sup>1</sup>H} NMR (376 MHz, CDCl<sub>3</sub>)**  $\delta_F$ : -65.6 (s, CF<sub>3</sub>); **<sup>13</sup>C NMR (CDCl<sub>3</sub>, 100 MHz)**  $\delta_C$ : 28.6 (CH<sub>2</sub>CO), 42.6 (CH<sub>2(morph)</sub>), 44.3 (CH<sub>2</sub>Ph), 45.5 (q, <sup>2</sup>*J*<sub>C-F</sub> 24.8, CHCF<sub>3</sub>), 45.9 (CH<sub>2(morph)</sub>), 56.0 (C(3)), 66.3 (CH<sub>2(morph)</sub>), 66.8 (CH<sub>2(morph)</sub>), 110.2 (CH-Ar), 122.2 (CH-Ar), 126.8 (q, <sup>1</sup>*J*<sub>C-F</sub> 280.3, CF<sub>3</sub>), 126.2 (CH-Ar), 127.2 (2×CH-Ar), 127.5 (CH-Ar), 127.6 (CH-Ar), 127.8 (2×CH-Ar), 128.3 (CH-Ar), 128.7 (2×CH-Ar), 129.0 (CH-Ar), 129.2 (CH-Ar), 135.5 (C-Ar), 137.2 (C-Ar), 137.7 (C-Ar), 143.2 (C-Ar), 167.9 (CON), 176.3 (CONHBn); **HRMS (NSI<sup>+</sup>)** exact mass calcd. For C<sub>29</sub>H<sub>28</sub>F<sub>3</sub>N<sub>2</sub>O<sub>3</sub><sup>+</sup> (M+H<sup>+</sup>) requires *m/z* 509.2047, found *m/z* 509.2034 (-2.6 ppm).

**(*S*)-*N*-benzyl-3-((*R*)-1-benzyl-5-methoxy-2-oxo-3-phenylindolin-3-yl)-4,4,4-trifluorobutanamide (58)**

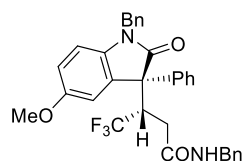

Following General Procedure **9**, 1-benzyl-5-methoxy-3-phenylindolin-2-one (65.9 mg, 0.2 mmol), 4-nitrophenyl (*E*)-4,4,4-trifluorobut-2-enoate (52.2 mg, 0.2 mmol), (2*S*,3*R*)-HyperBTM (6.2 mg, 0.02 mmol) and DIPEA (35.0  $\mu$ L, 0.2 mmol) in anhydrous THF (2.0 mL) at room temperature for 48 h. Benzyl amine (109  $\mu$ L, 1.0 mmol) was added and the reaction was stirred at room temperature overnight. The crude residue (90:10 dr) was purified by flash silica chromatography (6:1 Petrol : EtOAc,  $R_f$  0.16) to give desired compound (80.0 mg, 72%) as a white solid. mp: 79–81°C;  $[\alpha]_D^{20} = +213.0$  (*c* 0.5, CHCl<sub>3</sub>); Chiral HPLC analysis, Chiralcel AS-H (90:10 hexane : IPA, flow rate 1.0 mL/min<sup>-1</sup>, 254 nm, 30 °C)  $t_R$  (major): 19.5 min,  $t_R$  (minor): 15.8 min, 98:2 er;  $v_{max}$  (film), 3310 (N-H), 1724 (C=O), 1649 (C=O), 1180 (C-F), 1153 (C-F), 1121 (C-F); **<sup>1</sup>H NMR (CDCl<sub>3</sub>, 400 MHz)**  $\delta_H$ : 2.54–2.65 (2H, m, CH<sub>2</sub>CO), 3.79 (3H, s, OCH<sub>3</sub>), 4.32 (1H, dd, *J* 14.6, 5.8, NHCH<sub>2</sub>Ph), 4.47 (1H, dd, *J* 14.6, 5.8, NHCH<sub>2</sub>Ph), 4.59–4.64 (1H, m, CHCF<sub>3</sub>), 4.82 (1H, d, *J* 15.8, CH<sub>2</sub>Ph), 4.87 (1H, d, *J* 15.8, CH<sub>2</sub>Ph), 5.65 (1H, t, *J* 5.4, NHCH<sub>2</sub>Ph), 6.71 (1H, d, *J* 8.6, CH-Ar), 6.82 (1H, dd, *J* 8.6, 2.5, CH-Ar), 6.89 (1H, d, *J* 2.4, CH-Ar), 7.16–7.39 (12H, m, CH-Ar), 7.47 (2H, d, *J* 6.9, CH-Ar); **<sup>19</sup>F{<sup>1</sup>H} NMR (376 MHz, CDCl<sub>3</sub>)**  $\delta_F$ : -65.5 (s, CF<sub>3</sub>); **<sup>13</sup>C NMR (CDCl<sub>3</sub>, 100 MHz)**  $\delta_C$ : 32.8 (CH<sub>2</sub>CO), 44.0 (CH<sub>2</sub>Ph), 44.4 (CH<sub>2</sub>Ph), 45.7 (q, <sup>2</sup>*J*<sub>C-F</sub> 25.0, CHCF<sub>3</sub>), 55.8 (OCH<sub>3</sub>), 56.0 (C(3)), 110.3 (CH-Ar), 112.6 (CH-Ar), 114.5 (CH-Ar), 126.8 (q, <sup>1</sup>*J*<sub>C-F</sub> 280.5, CF<sub>3</sub>), 127.2 (2×CH-Ar), 127.6 (2×CH-Ar), 127.7 (2×CH-Ar), 127.9 (2×CH-Ar), 128.3 (CH-Ar), 128.7 (4×CH-Ar), 128.9 (CH-Ar), 129.0 (C-Ar), 135.6 (C-Ar), 136.8 (C-Ar), 137.1 (C-Ar), 137.8 (C-Ar), 141.8 (C-Ar), 155.5 (C-Ar), 168.9 (CON), 176.0 (CONHBn); **HRMS (NSI<sup>+</sup>)** exact mass calcd. For C<sub>33</sub>H<sub>30</sub>F<sub>3</sub>N<sub>2</sub>O<sub>3</sub><sup>+</sup> (M+H<sup>+</sup>) requires *m/z* 559.2203, found *m/z* 559.2191 (-2.2 ppm).

**(S)-N-benzyl-3-((R)-1-benzyl-5-chloro-2-oxo-3-phenylindolin-3-yl)-4,4,4-trifluorobutanamide (59)**

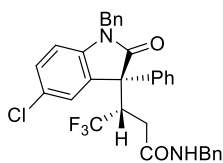

Following General Procedure **9**, 1-benzyl-5-chloro-3-phenylindolin-2-one (66.7 mg, 0.2 mmol), 4-nitrophenyl (*E*)-4,4,4-trifluorobut-2-enoate (52.2 mg, 0.2 mmol), (2*S*,3*R*)-HyperBTM (6.2 mg, 0.02 mmol) and DIPEA (35.0  $\mu$ L, 0.2 mmol) in anhydrous THF (2.0 mL) at room temperature for 48 h. Benzyl amine (109  $\mu$ L, 1.0 mmol) was added and the reaction was stirred at room temperature overnight. The crude residue (>95:5 dr) was purified by flash silica chromatography (6:1 Petrol : EtOAc,  $R_f$  0.16) to give desired compound (109.0 mg, 97%) as a white solid. mp: 94–95°C;  $[\alpha]_D^{20} = +209.8$  (*c* 0.5,  $\text{CHCl}_3$ ); Chiral HPLC analysis, Chiralcel IC (93:7 hexane : IPA, flow rate 1 mL/min<sup>-1</sup>, 254 nm, 50 °C)  $t_R$  (major): 52.7 min,  $t_R$  (minor): 67.8 min, 93:7 er;  $v_{\text{max}}$  (film), 3337 (N-H), 1717 (C=O), 1651 (C=O), 1186 (C-F), 1153 (C-F), 1119 (C-F); <sup>1</sup>H NMR ( $\text{CDCl}_3$ , 400 MHz)  $\delta_H$ : 2.54–2.65 (2H, m,  $\text{CH}_2\text{CO}$ ), 4.34 (1H, dd, *J* 14.6, 5.8,  $\text{NHCH}_2\text{Ph}$ ), 4.48 (1H, dd, *J* 14.6, 5.8,  $\text{NHCH}_2\text{Ph}$ ), 4.61–4.66 (1H, m,  $\text{CHCF}_3$ ), 4.84 (1H, d, *J* 15.8,  $\text{CH}_2\text{Ph}$ ), 4.89 (1H, d, *J* 15.8,  $\text{CH}_2\text{Ph}$ ), 5.62 (1H, t, *J* 5.3,  $\text{NHCH}_2\text{Ph}$ ), 6.74 (1H, d, *J* 8.3,  $\text{CH-Ar}$ ), 7.14–7.16 (2H, m,  $\text{CH-Ar}$ ), 7.21–7.23 (2H, m,  $\text{CH-Ar}$ ), 7.25–7.40 (11H, m,  $\text{CH-Ar}$ ), 7.43–7.47 (2H, m,  $\text{CH-Ar}$ ); <sup>19</sup>F{<sup>1</sup>H} NMR (376 MHz,  $\text{CDCl}_3$ )  $\delta_F$ : –65.5 (s,  $\text{CF}_3$ ); <sup>13</sup>C NMR ( $\text{CDCl}_3$ , 100 MHz)  $\delta_C$ : 32.7 ( $\text{CH}_2\text{CO}$ ), 44.1 ( $\text{CH}_2\text{Ph}$ ), 44.4 ( $\text{CH}_2\text{Ph}$ ), 45.7 (q, <sup>2</sup> $J_{\text{C-F}}$  25.1,  $\text{CHCF}_3$ ), 56.0 (*C*(3)), 111.1 ( $\text{CH-Ar}$ ), 126.4 ( $\text{CH-Ar}$ ), 126.6 (q, <sup>1</sup> $J_{\text{C-F}}$  280.9,  $\text{CF}_3$ ), 127.2 (2 $\times$  $\text{CH-Ar}$ ), 127.6 (2 $\times$  $\text{CH-Ar}$ ), 127.7 (2 $\times$  $\text{CH-Ar}$ ), 127.8 ( $\text{CH-Ar}$ ), 127.9 (2 $\times$  $\text{CH-Ar}$ ), 128.6 ( $\text{CH-Ar}$ ), 128.8 (4 $\times$  $\text{CH-Ar}$ ), 129.2 (4 $\times$  $\text{CH-Ar}$ ), 135.0 (*C-Ar*), 136.5 (*C-Ar*), 137.6 (*C-Ar*), 141.8 (*C-Ar*), 168.6 (CON), 175.9 (CONHBn); HRMS (NSI<sup>+</sup>) exact mass calcd. For  $\text{C}_{32}\text{H}_{27}\text{ClF}_3\text{N}_2\text{O}_2^+$  ( $\text{M}+\text{H}^+$ ) requires *m/z* 563.1708, found *m/z* 563.1701 (–1.3 ppm).

**(S)-N-benzyl-3-((R)-1-benzyl-6-chloro-2-oxo-3-phenylindolin-3-yl)-4,4,4-trifluorobutanamide (60)**

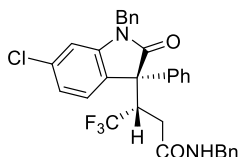

Following General Procedure **9**, 1-benzyl-6-chloro-3-phenylindolin-2-one (66.7 mg, 0.2 mmol), 4-nitrophenyl (*E*)-4,4,4-trifluorobut-2-enoate (52.2 mg, 0.2 mmol), (2*S*,3*R*)-HyperBTM (6.2 mg, 0.02 mmol) and DIPEA (35.0  $\mu$ L, 0.2 mmol) in anhydrous THF (2.0 mL) at room temperature for 48 h. Benzyl amine (109  $\mu$ L, 1.0 mmol) was added and the reaction was stirred at room temperature overnight. The crude residue (>95:5 dr) was purified by flash silica chromatography (6:1 Petrol : EtOAc,  $R_f$  0.15) to give desired compound (101.0 mg, 90%) as a white solid. mp: 98–99°C;  $[\alpha]_D^{20} = +185.2$  (*c* 0.5,  $\text{CHCl}_3$ ); Chiral HPLC analysis, Chiralcel OD-H (93:7 hexane : IPA, flow rate 1 mL/min<sup>-1</sup>, 254 nm, 30 °C)  $t_R$  (major): 29.6 min,  $t_R$  (minor): 53.2 min, 95:5 er;  $v_{\text{max}}$  (film), 3345 (N-H), 1717 (C=O), 1651 (C=O), 1188 (C-F), 1152 (C-F), 1119 (C-F); <sup>1</sup>H NMR ( $\text{CDCl}_3$ , 400 MHz)  $\delta_H$ : 2.54–2.63 (2H, m,  $\text{CH}_2\text{CO}$ ), 4.31 (1H, dd, *J* 14.6, 5.8,  $\text{NHCH}_2\text{Ph}$ ), 4.46 (1H, dd, *J* 14.6, 5.8,  $\text{NHCH}_2\text{Ph}$ ), 4.59–4.65 (1H, m,  $\text{CHCF}_3$ ), 4.84 (2H, s,  $\text{CH}_2\text{Ph}$ ), 5.60 (1H, t, *J* 5.4,  $\text{NHCH}_2\text{Ph}$ ), 6.82 (1H, d, *J* 1.8,  $\text{CH-Ar}$ ), 7.10 (1H, dd, *J* 8.0, 1.9,  $\text{CH-Ar}$ ), 7.15–7.22 (5H, m,  $\text{CH-Ar}$ ), 7.24–7.38 (9H, m,  $\text{CH-Ar}$ ), 7.43 (2H, d, *J* 6.2,  $\text{CH-Ar}$ ); <sup>19</sup>F{<sup>1</sup>H} NMR (376 MHz,  $\text{CDCl}_3$ )  $\delta_F$ : –65.6 (s,  $\text{CF}_3$ ); <sup>13</sup>C NMR ( $\text{CDCl}_3$ , 100 MHz)  $\delta_C$ : 32.8 ( $\text{CH}_2\text{CO}$ ), 44.1 ( $\text{CH}_2\text{Ph}$ ), 44.4 ( $\text{CH}_2\text{Ph}$ ), 45.8 (q, <sup>2</sup> $J_{\text{C-F}}$  25.2,  $\text{CHCF}_3$ ), 55.6 (*C*(3)), 110.7 ( $\text{CH-Ar}$ ), 122.3 ( $\text{CH-Ar}$ ), 125.8 ( $\text{CH-Ar}$ ), 126.6

(q,  $^1J_{C-F}$  280.6,  $CF_3$ ), 127.1 (CH-Ar), 127.2 (2×CH-Ar), 127.6 (2×CH-Ar), 127.7 (CH-Ar), 127.8 (CH-Ar), 127.9 (2×CH-Ar), 128.6 (CH-Ar), 128.8 (2×CH-Ar), 128.9 (2×CH-Ar), 129.2 (2×CH-Ar), 134.9 (C-Ar), 135.1 (C-Ar), 136.6 (C-Ar), 137.7 (C-Ar), 144.5 (C-Ar), 168.7 (CON), 176.4 (CONHBn); **HRMS** ( $NSI^+$ ) exact mass calcd. For  $C_{32}H_{27}ClF_3N_2O_2^+$  ( $M+H^+$ ) requires  $m/z$  563.1708, found  $m/z$  563.1698 (−1.8 ppm).

**(S)-N-benzyl-3-((R)-1-benzyl-7-chloro-2-oxo-3-phenylindolin-3-yl)-4,4,4-trifluorobutanamide (61)**

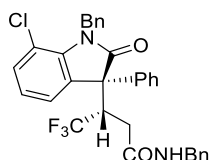

Following General Procedure **9**, 1-benzyl-7-chloro-3-phenylindolin-2-one (66.7 mg, 0.2 mmol), 4-nitrophenyl (*E*)-4,4,4-trifluorobut-2-enoate (52.2 mg, 0.2 mmol), (2*S*,3*R*)-HyperBTM (6.2 mg, 0.02 mmol) and DIPEA (35.0  $\mu$ L, 0.2 mmol) in anhydrous THF (2.0 mL) at  $-40$  °C for 48 h. Benzyl amine (109  $\mu$ L, 1.0 mmol) was added and the reaction was stirred at room temperature overnight. The crude residue (>95:5 dr) was purified by flash silica chromatography (6:1 Petrol : EtOAc,  $R_f$  0.15) to give desired compound (110.0 mg, 98%) as a white solid. mp:  $97-98$ °C;  $[\alpha]_D^{20} = +209.8$  ( $c$  0.6,  $CHCl_3$ ); Chiral HPLC analysis, Chiralcel OD-H (90:10 hexane : IPA, flow rate 1 mL/min $^{-1}$ , 254 nm, 30 °C)  $t_R$  (major): 15.0 min,  $t_R$  (minor): 34.1 min, 90:10 er;  $v_{max}$  (film), 3323 (N-H), 1699 (C=O), 1651 (C=O), 1179 (C-F), 1148 (C-F), 1115 (C-F);  **$^1H$ NMR** ( $CDCl_3$ , 400 MHz)  $\delta_H$ : 2.55–2.65 (2H, m,  $CH_2CO$ ), 4.32 (1H, dd,  $J$  14.6, 5.8,  $NHCH_2Ph$ ), 4.47 (1H, dd,  $J$  14.6, 5.8,  $NHCH_2Ph$ ), 4.60–4.69 (1H, m,  $CHCF_3$ ), 5.24 (1H, d,  $J$  16.3,  $CH_2Ph$ ), 5.37 (1H, d,  $J$  16.3,  $CH_2Ph$ ), 5.60 (1H, t,  $J$  5.1,  $NHCH_2Ph$ ), 7.04–7.10 (3H, m,  $CH$ -Ar), 7.19–7.22 (6H, m,  $CH$ -Ar), 7.27–7.38 (7H, m,  $CH$ -Ar), 7.42 (2H, d,  $J$  6.0,  $CH$ -Ar);  **$^{19}F\{^1H\}$  NMR** (376 MHz,  $CDCl_3$ )  $\delta_F$ :  $-65.4$  (s,  $CF_3$ );  **$^{13}C$  NMR** ( $CDCl_3$ , 100 MHz)  $\delta_C$ : 32.8 ( $CH_2CO$ ), 44.1 ( $CH_2Ph$ ), 45.4 ( $CH_2Ph$ ), 45.8 (q,  $^2J_{C-F}$  24.8,  $CHCF_3$ ), 55.5 ( $C(3)$ ), 116.4 ( $CH$ -Ar), 123.1 ( $CH$ -Ar), 124.9 ( $CH$ -Ar), 126.3 (2× $CH$ -Ar), 126.6 (q,  $^1J_{C-F}$  280.6,  $CF_3$ ), 127.0 ( $CH$ -Ar), 127.7 (2× $CH$ -Ar), 127.9 (2× $CH$ -Ar), 128.4 (2× $CH$ -Ar), 128.6 ( $CH$ -Ar), 128.8 (2× $CH$ -Ar), 129.2 (2× $CH$ -Ar), 130.4 ( $C$ -Ar), 131.9 ( $C$ -Ar), 136.8 ( $C$ -Ar), 137.4 ( $C$ -Ar), 137.7 ( $C$ -Ar), 139.6 ( $C$ -Ar), 144.5 ( $C$ -Ar), 168.7 (CON), 177.0 (CONHBn); **HRMS** ( $NSI^+$ ) exact mass calcd. For  $C_{32}H_{27}ClF_3N_2O_2^+$  ( $M+H^+$ ) requires  $m/z$  563.1708, found  $m/z$  563.1698 (−1.8 ppm).

**(S)-N-benzyl-3-((R)-1-benzyl-3-(4-methoxyphenyl)-2-oxoindolin-3-yl)-4,4,4-trifluorobutanamide (62)**

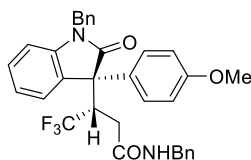

Following General Procedure **9**, 1-benzyl-3-(4-methoxyphenyl)indolin-2-one (65.9 mg, 0.2 mmol), 4-nitrophenyl (*E*)-4,4,4-trifluorobut-2-enoate (52.2 mg, 0.2 mmol), (2*S*,3*R*)-HyperBTM (6.2 mg, 0.02 mmol) and DIPEA (35.0  $\mu$ L, 0.2 mmol) in anhydrous THF (2.0 mL) at room temperature for 48 h. Benzyl amine (109  $\mu$ L, 1.0 mmol) was added and the reaction was stirred at room temperature overnight. The crude residue (>95:5 dr) was purified by flash silica chromatography (95:5 Petrol : EtOAc,  $R_f$  0.15) to give desired compound (77.0 mg, 69%) as a white solid. mp:  $74-75$ °C;  $[\alpha]_D^{20} = +194.6$  ( $c$  0.5,  $CHCl_3$ );

Chiral HPLC analysis, Chiralcel OD-H (90:10 hexane : IPA, flow rate 1 mL/min<sup>-1</sup>, 254 nm, 30 °C) t<sub>R</sub> (major): 20.2 min, t<sub>R</sub> (minor): 27.7 min, >99:1 er; v<sub>max</sub> (film), 3321 (N-H), 1707 (C=O), 1607 (C=O), 1184 (C-F), 1149 (C-F), 1111 (C-F); <sup>1</sup>H NMR (CDCl<sub>3</sub>, 400 MHz) δ<sub>H</sub>: 2.57–2.66 (2H, m, CH<sub>2</sub>CO), 3.80 (3H, s, CH<sub>3</sub>O), 4.33 (1H, dd, *J* 14.6, 5.7, NHCH<sub>2</sub>Ph), 4.48 (1H, dd, *J* 14.6, 5.7, NHCH<sub>2</sub>Ph), 4.53–4.58 (1H, m, CHCF<sub>3</sub>), 4.88 (2H, s, CH<sub>2</sub>Ph), 5.55 (1H, br, NHCH<sub>2</sub>Ph), 6.81 (1H, d, *J* 7.7, CH-Ar), 6.87–6.91 (2H, m, CH-Ar), 7.09–7.13 (1H, m, CH-Ar), 7.16–7.39 (14H, m, CH-Ar); <sup>19</sup>F{<sup>1</sup>H} NMR (376 MHz, CDCl<sub>3</sub>) δ<sub>F</sub>: –65.7 (s, CF<sub>3</sub>); <sup>13</sup>C NMR (CDCl<sub>3</sub>, 100 MHz) δ<sub>C</sub>: 32.9 (CH<sub>2</sub>CO), 44.1 (CH<sub>2</sub>Ph), 44.2 (CH<sub>2</sub>Ph), 45.9 (q, <sup>2</sup>J<sub>C-F</sub> 24.5, CHCF<sub>3</sub>), 55.1 (C(3)), 55.3 (CH<sub>3</sub>O), 110.2 (CH-Ar), 114.3 (2×CH-Ar), 122.1 (2×CH-Ar), 126.6 (q, <sup>1</sup>J<sub>C-F</sub> 280.5, CF<sub>3</sub>), 127.2 (2×CH-Ar), 127.6 (2×CH-Ar), 127.7 (CH-Ar), 127.9 (2×CH-Ar), 128.7 (2×CH-Ar), 128.8 (2×CH-Ar), 128.9 (CH-Ar), 129.0 (2×CH-Ar), 129.1 (CH-Ar), 135.5 (C-Ar), 137.7 (C-Ar), 143.2 (C-Ar), 159.5 (MeOC-Ar), 169.0 (CON), 176.7 (CONHBn); HRMS (NSI<sup>+</sup>) exact mass calcd. For C<sub>33</sub>H<sub>30</sub>F<sub>3</sub>N<sub>2</sub>O<sub>3</sub><sup>+</sup> (M+H<sup>+</sup>) requires m/z 559.2203, found m/z 559.2195 (–1.4 ppm).

**(S)-3-((R)-3-(Benzo[d][1,3]dioxol-5-yl)-1-benzyl-2-oxoindolin-3-yl)-N-benzyl-4,4,4-trifluorobutanamide (63)**

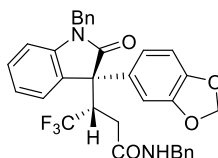

Following General Procedure 9, 3-(benzo[d][1,3]dioxol-5-yl)-1-benzylindolin-2-one (68.7 mg, 0.2 mmol), 4-nitrophenyl (*E*)-4,4,4-trifluorobut-2-enoate (52.2 mg, 0.2 mmol), (2*S*,3*R*)-HyperBTM (6.2 mg, 0.02 mmol) and DIPEA (35.0 μL, 0.2 mmol) in anhydrous THF (2.0 mL) at room temperature for 48 h. Benzyl amine (109 μL, 1.0 mmol) was added and the reaction was stirred at room temperature overnight. The crude residue (>95:5 dr) was purified by flash silica chromatography (6:1 Petrol : EtOAc, *R<sub>f</sub>* 0.14) to give desired compound (78.0 mg, 68%) as a white solid. mp: 83–85°C; [α]<sub>D</sub><sup>20</sup> = +182.4 (*c* 0.5, CHCl<sub>3</sub>); Chiral HPLC analysis, Chiralcel OD-H (90:10 hexane : IPA, flow rate 1 mL/min<sup>-1</sup>, 254 nm, 30 °C) t<sub>R</sub> (major): 30.2 min, t<sub>R</sub> (minor): 52.1 min, 99:1 er; v<sub>max</sub> (film), 3209 (N-H), 1701 (C=O), 1655 (C=O), 1151 (C-F), 1113 (C-F); <sup>1</sup>H NMR (CDCl<sub>3</sub>, 400 MHz) δ<sub>H</sub>: 2.58–2.69 (2H, m, CH<sub>2</sub>CO), 4.36 (1H, dd, *J* 14.6, 5.3, NHCH<sub>2</sub>Ph), 4.45–4.53 (2H, m, NHCH<sub>2</sub>Ph, CHCF<sub>3</sub>), 4.59–4.67 (1H, m, CHCF<sub>3</sub>), 4.86 (1H, d, *J* 16.6, CH<sub>2</sub>Ph), 4.90 (1H, d, *J* 16.6, CH<sub>2</sub>Ph), 5.62 (1H, t, *J* 5.4, NHCH<sub>2</sub>Ph), 5.95 (1H, d, *J* 1.4, OCH<sub>2</sub>O), 5.97 (1H, t, *J* 1.4, OCH<sub>2</sub>O), 6.81 (1H, d, *J* 7.8, CH-Ar), 6.87 (1H, d, *J* 7.8, CH-Ar), 7.07–7.13 (2H, m, CH-Ar), 7.19–7.21 (2H, m, CH-Ar), 7.23–7.37 (10H, m, CH-Ar); <sup>19</sup>F{<sup>1</sup>H} NMR (376 MHz, CDCl<sub>3</sub>) δ<sub>F</sub>: –65.6 (s, CF<sub>3</sub>); <sup>13</sup>C NMR (CDCl<sub>3</sub>, 100 MHz) δ<sub>C</sub>: 32.9 (CH<sub>2</sub>CO), 44.1 (CH<sub>2</sub>Ph), 44.3 (CH<sub>2</sub>Ph), 46.1 (q, <sup>2</sup>J<sub>C-F</sub> 24.6, CHCF<sub>3</sub>), 55.4 (C(3)), 101.4 (OCH<sub>2</sub>O), 101.4 (CH-Ar), 108.3 (CH-Ar), 108.4 (CH-Ar), 110.2 (CH-Ar), 121.5 (CH-Ar), 122.2 (CH-Ar), 126.2 (CH-Ar), 126.6 (q, <sup>1</sup>J<sub>C-F</sub> 280.7, CF<sub>3</sub>), 127.2 (2×CH-Ar), 127.4 (CH-Ar), 127.6 (CH-Ar), 127.9 (2×CH-Ar), 128.7 (2×CH-Ar), 128.8 (2×CH-Ar), 129.2 (C-Ar), 130.7 (C-Ar), 135.5 (C-Ar), 137.7 (C-Ar), 143.1 (C-Ar), 147.7 (C-Ar), 148.3 (C-Ar), 168.9 (CON), 176.4 (CONHBn); HRMS (NSI<sup>+</sup>) exact mass calcd. For C<sub>33</sub>H<sub>28</sub>F<sub>3</sub>N<sub>2</sub>O<sub>4</sub>S<sup>+</sup> (M+H<sup>+</sup>) requires m/z 573.1996, found m/z 573.1985 (–1.9 ppm).

**(S)-N-benzyl-3-((R)-1-benzyl-3-(naphthalen-2-yl)-2-oxoindolin-3-yl)-4,4,4-trifluorobutanamide (64)**

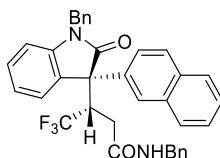

Following General Procedure **9**, 1-benzyl-3-(naphthalen-2-yl)indolin-2-one (69.9 mg, 0.2 mmol), 4-nitrophenyl (*E*)-4,4,4-trifluorobut-2-enoate (52.2 mg, 0.2 mmol), (*2S,3R*)-HyperBTM (6.2 mg, 0.02 mmol) and DIPEA (35.0  $\mu$ L, 0.2 mmol) in anhydrous THF (2.0 mL) at room temperature for 48 h. Benzyl amine (109  $\mu$ L, 1.0 mmol) was added and the reaction was stirred at room temperature overnight. The crude residue (>95:5 dr) was purified by flash silica chromatography (5:1 Petrol : EtOAc,  $R_f$  0.15) to give desired compound (95.0 mg, 82%) as a white solid. mp: 88–89°C;  $[\alpha]_D^{20} = +176.2$  (*c* 0.5,  $\text{CHCl}_3$ ); Chiral HPLC analysis, Chiralcel OD-H (90:10 hexane : IPA, flow rate 1 mL/min<sup>-1</sup>, 254 nm, 30 °C)  $t_R$  (major): 22.2 min,  $t_R$  (minor): 46.6 min, 98:2 er;  $v_{\max}$  (film), 3319 (N-H), 1715 (C=O), 1651 (C=O), 1184 (C-F), 1150 (C-F), 1109 (C-F); <sup>1</sup>H NMR ( $\text{CDCl}_3$ , 400 MHz)  $\delta_H$ : 2.57–2.68 (2H, m,  $\text{CH}_2\text{CO}$ ), 4.17 (1H, dd, *J* 14.5, 5.3,  $\text{NCH}_2\text{Ph}$ ), 4.39 (1H, dd, *J* 14.5, 5.7,  $\text{NHCH}_2\text{Ph}$ ), 4.71–4.80 (1H, m,  $\text{CHCF}_3$ ), 4.86 (1H, d, *J* 15.9,  $\text{CH}_2\text{Ph}$ ), 4.86 (1H, d, *J* 15.9,  $\text{CH}_2\text{Ph}$ ), 5.45 (1H, t, *J* 5.4,  $\text{NHCH}_2\text{Ph}$ ), 6.87 (1H, d, *J* 7.8,  $\text{CH-Ar}$ ), 7.07–7.10 (2H, m,  $\text{CH-Ar}$ ), 7.16–7.28 (9H, m,  $\text{CH-Ar}$ ), 7.34–7.39 (2H, m,  $\text{CH-Ar}$ ), 7.45–7.54 (2H, m,  $\text{CH-Ar}$ ), 7.66 (1H, s,  $\text{CH-Ar}$ ), 7.74 (1H, d, *J* 7.8,  $\text{CH-Ar}$ ), 7.85 (1H, d, *J* 8.0,  $\text{CH-Ar}$ ), 7.90 (2H, s,  $\text{CH-Ar}$ ); <sup>19</sup>F{<sup>1</sup>H} NMR (376 MHz,  $\text{CDCl}_3$ )  $\delta_F$ : –65.6 (s,  $\text{CF}_3$ ); <sup>13</sup>C NMR ( $\text{CDCl}_3$ , 100 MHz)  $\delta_C$ : 33.0 ( $\text{CH}_2\text{CO}$ ), 44.0 ( $\text{CH}_2\text{Ph}$ ), 44.3 ( $\text{CH}_2\text{Ph}$ ), 45.9 (q, <sup>2</sup> $J_{\text{C-F}}$  24.8,  $\text{CHCF}_3$ ), 55.9 (*C*(3)), 110.3 ( $\text{CH-Ar}$ ), 122.3 (2 $\times$  $\text{CH-Ar}$ ), 125.1 ( $\text{CH-Ar}$ ), 126.4 (2 $\times$  $\text{CH-Ar}$ ), 126.6 (q, <sup>1</sup> $J_{\text{C-F}}$  271.4,  $\text{CF}_3$ ), 126.8 ( $\text{CH-Ar}$ ), 127.3 (3 $\times$  $\text{CH-Ar}$ ), 127.5 ( $\text{CH-Ar}$ ), 127.6 (2 $\times$  $\text{CH-Ar}$ ), 127.8 (2 $\times$  $\text{CH-Ar}$ ), 128.4 ( $\text{CH-Ar}$ ), 128.7 (4 $\times$  $\text{CH-Ar}$ ), 129.1 ( $\text{CH-Ar}$ ), 129.3 ( $\text{CH-Ar}$ ), 132.9 (*C-Ar*), 133.0 (*C-Ar*), 134.6 (*C-Ar*), 135.5 (*C-Ar*), 137.6 (*C-Ar*), 143.3 (*C-Ar*), 168.8 (CON), 176.3 (CONHBn); HRMS (NSI<sup>+</sup>) exact mass calcd. For  $\text{C}_{36}\text{H}_{30}\text{F}_3\text{N}_2\text{O}_2^+$  ( $\text{M}+\text{H}^+$ ) requires *m/z* 579.2254, found *m/z* 579.2243 (–1.9 ppm).

**(*S*)-*N*-benzyl-3-((*R*)-1-benzyl-2-oxo-3-(4-(trifluoromethyl)phenyl)indolin-3-yl)-4,4,4-trifluorobutanamide (65)**

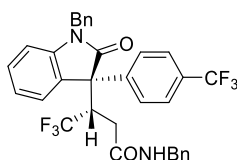

Following General Procedure **9**, 1-methyl-3-(4-(trifluoromethyl)phenyl)indolin-2-one (58.2 mg, 0.2 mmol), 4-nitrophenyl (*E*)-4,4,4-trifluorobut-2-enoate (52.2 mg, 0.2 mmol), (*2S,3R*)-HyperBTM (6.2 mg, 0.02 mmol) and DIPEA (35.0  $\mu$ L, 0.2 mmol) in anhydrous THF (2.0 mL) at –40 °C for 48 h. Benzyl amine (109  $\mu$ L, 1.0 mmol) was added and the reaction was stirred at room temperature overnight. The crude residue (>95:5 dr) was purified by flash silica chromatography (95:5 Petrol : EtOAc,  $R_f$  0.15) to give desired compound (108.0 mg, 91%) as a white solid. mp: 192–193°C;  $[\alpha]_D^{20} = +174.0$  (*c* 0.5,  $\text{CHCl}_3$ ); Chiral HPLC analysis, Chiralcel OD-H (95:5 hexane : IPA, flow rate 1 mL/min<sup>-1</sup>, 254 nm, 30 °C)  $t_R$  (major): 136.9 min,  $t_R$  (minor): 201.3 min, 92:8 er;  $v_{\max}$  (film), 3308 (N-H), 1713 (C=O), 1647 (C=O), 1157 (C-F), 1122 (C-F), 1107 (C-F); <sup>1</sup>H NMR ( $\text{CDCl}_3$ , 400 MHz)  $\delta_H$ : 2.51 (1H, d, *J* 14.2,  $\text{CH}_2\text{CO}$ ), 2.64 (1H, dd, *J* 15.7, 8.8,  $\text{CH}_2\text{CO}$ ), 4.30 (1H, dd, *J* 13.4, 4.3,  $\text{NHCH}_2\text{Ph}$ ), 4.45 (1H, dd, *J* 13.4, 4.3,  $\text{NHCH}_2\text{Ph}$ ), 4.62–4.71 (1H, m,  $\text{CHCF}_3$ ), 4.88 (2H, s, *J* 16.1,  $\text{CH}_2\text{Ph}$ ), 5.61 (1H, t, *J* 5.4,  $\text{NHCH}_2\text{Ph}$ ), 6.87 (1H, d, *J* 7.7,  $\text{CH-Ar}$ ), 7.13–7.36 (13H, m,  $\text{CH-Ar}$ ), 7.61 (4H, m,  $\text{CH-Ar}$ ) ppm; <sup>19</sup>F{<sup>1</sup>H} NMR (376 MHz,  $\text{CDCl}_3$ )  $\delta_F$ : –65.7 (s,  $\text{CF}_3$ ), –62.7 (s,  $\text{Ar-CF}_3$ ); <sup>13</sup>C NMR ( $\text{CDCl}_3$ , 100 MHz)  $\delta_C$ : 32.8 ( $\text{CH}_2\text{CO}$ ), 44.1 ( $\text{CH}_2\text{Ph}$ ),

44.4 (CH<sub>2</sub>Ph), 45.7 (q, <sup>2</sup>J<sub>C-F</sub> 25.1, CHCF<sub>3</sub>), 55.9 (C(3)), 110.5 (CH-Ar), 122.6 (CH-Ar), 125.9 (2×CH-Ar), 126.1 (CH-Ar), 126.5 (q, <sup>1</sup>J<sub>C-F</sub> 279.8, CF<sub>3</sub>), 126.6 (q, <sup>1</sup>J<sub>C-F</sub> 271.4, CF<sub>3</sub>), 126.8 (CH-Ar), 127.2 (2×CH-Ar), 127.7 (2×CH-Ar), 127.8 (2×CH-Ar), 127.9 (CH-Ar), 128.3 (CH-Ar), 128.8 (4×CH-Ar), 129.6 (C-Ar), 130.5 (q, <sup>2</sup>J<sub>C-F</sub> 32.2, CF<sub>3</sub>-C-Ar), 135.2 (C-Ar), 137.6 (C-Ar), 141.3 (C-Ar), 143.2 (C-Ar), 168.6 (CON), 175.6 (CONHBn); **HRMS (NSI<sup>+</sup>)** exact mass calcd. For C<sub>33</sub>H<sub>27</sub>F<sub>6</sub>N<sub>2</sub>O<sub>2</sub><sup>+</sup> (M+H<sup>+</sup>) requires m/z 597.1971, found m/z 597.1960 (−1.8 ppm).

**(S)-N-benzyl-3-((R)-1-benzyl-3-(4-fluorophenyl)-2-oxindolin-3-yl)-4,4,4-trifluorobutanamide (66)**

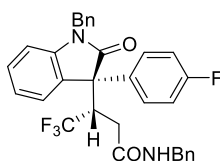

Following General Procedure **9**, 1-benzyl-3-(4-fluorophenyl)indolin-2-one (63.5 mg, 0.2 mmol), 4-nitrophenyl (*E*)-4,4,4-trifluorobut-2-enoate (52.2 mg, 0.2 mmol), (2*S*,3*R*)-HyperBTM (6.2 mg, 0.02 mmol) and DIPEA (35.0 μL, 0.2 mmol) in anhydrous THF (2.0 mL) at room temperature for 48 h. Benzyl amine (109 μL, 1.0 mmol) was added and the reaction was stirred at room temperature overnight. The crude residue (>95:5 dr) was purified by flash silica chromatography (95:5 Petrol : EtOAc, R<sub>f</sub> 0.15) to give desired compound (89.0 mg, 81%) as a white solid. mp: 90–91°C; [α]<sub>D</sub><sup>20</sup> = +198.2 (c 0.5, CHCl<sub>3</sub>); Chiral HPLC analysis, Chiralcel OD-H (95:5 hexane : IPA, flow rate 1 mL/min<sup>-1</sup>, 254 nm, 30 °C) t<sub>R</sub> (major): 49.5 min, t<sub>R</sub> (minor): 62.2 min, 98:2 er; ν<sub>max</sub> (film), 3280 (N-H), 1697 (C=O), 1645 (C=O), 1188 (C-F), 1152 (C-F), 1119 (C-F), 1107 (C-F); <sup>1</sup>H NMR (CDCl<sub>3</sub>, 400 MHz) δ<sub>H</sub>: 2.54–2.67 (2H, m, CH<sub>2</sub>CO), 4.34 (1H, dd, *J* 14.6, 5.7, NHCH<sub>2</sub>Ph), 4.47 (1H, dd, *J* 14.6, 5.7, NHCH<sub>2</sub>Ph), 4.54–4.63 (1H, m, CHCF<sub>3</sub>), 4.85 (1H, d, *J* 16.1, CH<sub>2</sub>Ph), 4.90 (1H, d, *J* 16.1, CH<sub>2</sub>Ph), 5.64 (1H, t, *J* 5.3, NHCH<sub>2</sub>Ph), 6.84 (1H, d, *J* 7.8, CH-Ar), 7.03 (2H, t, *J* 8.4, CH-Ar), 7.11–7.36 (13H, m, CH-Ar), 7.41–7.47 (2H, m, CH-Ar); <sup>19</sup>F{<sup>1</sup>H} NMR (376 MHz, CDCl<sub>3</sub>) δ<sub>F</sub>: −65.7 (s, CF<sub>3</sub>), −113.6 (s, F-Ph); <sup>13</sup>C NMR (CDCl<sub>3</sub>, 100 MHz) δ<sub>C</sub>: 32.8 (CH<sub>2</sub>CO), 44.1 (CH<sub>2</sub>Ph), 44.3 (CH<sub>2</sub>Ph), 45.9 (q, <sup>2</sup>J<sub>C-F</sub> 25.2, CHCF<sub>3</sub>), 55.2 (C(3)), 110.3 (CH-Ar), 115.8 (CH-Ar), 116.0 (CH-Ar), 122.4 (CH-Ar), 126.1 (CH-Ar), 126.7 (q, <sup>1</sup>J<sub>C-F</sub> 280.3, CF<sub>3</sub>), 127.2 (2×CH-Ar), 127.7 (2×CH-Ar), 127.9 (2×CH-Ar), 128.7 (3×CH-Ar), 128.8 (2×CH-Ar), 129.4 (CH-Ar), 129.7 (CH-Ar), 129.7 (C-Ar), 132.8 (C-Ar), 135.4 (C-Ar), 137.7 (C-Ar), 143.2 (C-Ar), 162.6 (d, <sup>1</sup>J<sub>C-F</sub> 246.9, F-C-Ar), 168.8 (CON), 176.3 (CONHBn); **HRMS (NSI<sup>+</sup>)** exact mass calcd. For C<sub>32</sub>H<sub>27</sub>F<sub>4</sub>N<sub>2</sub>O<sub>2</sub><sup>+</sup> (M+H<sup>+</sup>) requires m/z 547.2003, found m/z 547.1990 (−2.3 ppm).

**(S)-N-benzyl-3-((R)-1-benzyl-3-(3-fluorophenyl)-2-oxindolin-3-yl)-4,4,4-trifluorobutanamide (67)**

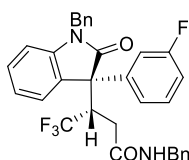

Following General Procedure **9**, 1-benzyl-3-(4-fluorophenyl)indolin-2-one (63.5 mg, 0.2 mmol), 4-nitrophenyl (*E*)-4,4,4-trifluorobut-2-enoate (52.2 mg, 0.2 mmol), (2*S*,3*R*)-HyperBTM (6.2 mg, 0.02 mmol) and DIPEA (35.0 μL, 0.2 mmol) in anhydrous THF (2.0 mL) at room temperature for 48 h. Benzyl amine (109 μL, 1.0 mmol) was added and the reaction was stirred at room temperature overnight. The crude residue (>95:5 dr) was purified by flash silica chromatography (95:5 Petrol : EtOAc, R<sub>f</sub> 0.15) to give desired compound (93.0 mg, 85%) as a white solid. mp: 88–90°C; [α]<sub>D</sub><sup>20</sup> = +198.2 (c 0.5, CHCl<sub>3</sub>); Chiral HPLC analysis, Chiralcel OD-H (90:10 hexane : IPA, flow rate 1 mL/min<sup>-1</sup>, 254 nm, 30 °C) t<sub>R</sub>



(major): 19.2 min,  $t_R$  (minor): 26.1 min, 98:2 er;  $v_{max}$  (film), 3276 (N-H), 1712 (C=O), 1703 (C=O), 1182 (C-F), 1155 (C-F), 1115 (C-F);  $^1\text{H NMR}$  ( $\text{CDCl}_3$ , 400 MHz)  $\delta_H$ : 2.55–2.69 (2H, m,  $\text{CH}_2\text{CO}$ ), 4.32 (1H, dd,  $J$  14.6, 5.8,  $\text{NHCH}_2\text{Ph}$ ), 4.47 (1H, dd,  $J$  14.6, 5.8,  $\text{NHCH}_2\text{Ph}$ ), 4.55–4.63 (1H, m,  $\text{CHCF}_3$ ), 4.85 (1H, d,  $J$  16.0,  $\text{CH}_2\text{Ph}$ ), 4.89 (1H, d,  $J$  16.0,  $\text{CH}_2\text{Ph}$ ), 5.81 (1H, t,  $J$  5.5,  $\text{NHCH}_2\text{Ph}$ ), 6.85 (1H, d,  $J$  7.8,  $\text{CH-Ar}$ ), 6.99–7.37 (16H, m,  $\text{CH-Ar}$ ), 7.42 (1H, d,  $J$  7.8,  $\text{CH-Ar}$ );  $^{19}\text{F}\{^1\text{H}\}$  NMR (376 MHz,  $\text{CDCl}_3$ )  $\delta_F$ : –65.6 (s,  $\text{CF}_3$ ), –111.1 (s,  $\text{F-Ph}$ );  $^{13}\text{C}$  NMR ( $\text{CDCl}_3$ , 100 MHz)  $\delta_C$ : 32.8 ( $\text{CH}_2\text{CO}$ ), 44.0 ( $\text{CH}_2\text{Ph}$ ), 44.4 ( $\text{CH}_2\text{Ph}$ ), 45.9 (q,  $^2J_{\text{C-F}}$  24.9,  $\text{CHCF}_3$ ), 55.7 ( $\text{C}(3)$ ), 110.4 ( $\text{CH-Ar}$ ), 115.1 (d,  $^2J_{\text{C-F}}$  23.6,  $\text{CH-Ar}$ ), 115.4 (d,  $^2J_{\text{C-F}}$  20.8,  $\text{CH-Ar}$ ), 122.5 ( $\text{CH-Ar}$ ), 123.6 ( $\text{CH-Ar}$ ), 123.7 ( $\text{CH-Ar}$ ), 126.2 ( $\text{CH-Ar}$ ), 126.7 (q,  $^1J_{\text{C-F}}$  280.6,  $\text{CF}_3$ ), 126.9 ( $\text{CH-Ar}$ ), 127.2 (2 $\times$  $\text{CH-Ar}$ ), 127.7 (2 $\times$  $\text{CH-Ar}$ ), 127.9 (2 $\times$  $\text{CH-Ar}$ ), 128.7 (2 $\times$  $\text{CH-Ar}$ ), 128.8 (2 $\times$  $\text{CH-Ar}$ ), 129.5 ( $\text{CH-Ar}$ ), 130.6 (d,  $^3J$  7.1,  $\text{CH-Ar}$ ), 135.3 ( $\text{C-Ar}$ ), 137.7 ( $\text{C-Ar}$ ), 139.7 (d,  $^3J$  7.1,  $\text{C-Ar}$ ), 143.1 ( $\text{C-Ar}$ ), 162.9 (d,  $^1J_{\text{C-F}}$  245.2,  $\text{F-C-Ar}$ ), 168.8 (CON), 175.9 (CONHBn); HRMS (NSI $^+$ ) exact mass calcd. For  $\text{C}_{32}\text{H}_{27}\text{F}_4\text{N}_2\text{O}_2^+$  ( $\text{M}+\text{H}^+$ ) requires  $m/z$  547.2003, found  $m/z$  547.1989 (–2.6 ppm).

**(S)-N-benzyl-3-((R)-1-benzyl-3-(3-methoxyphenyl)-2-oxindolin-3-yl)-4,4,4-trifluorobutanamide (68)**

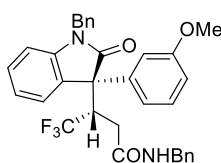

Following General Procedure 9, 1-benzyl-3-(3-methoxyphenyl)indolin-2-one (65.9 mg, 0.2 mmol), 4-nitrophenyl (*E*)-4,4,4-trifluorobut-2-enoate (52.2 mg, 0.2 mmol), (2*S*,3*R*)-HyperBTM (6.2 mg, 0.02 mmol) and DIPEA (35.0  $\mu\text{L}$ , 0.2 mmol) in anhydrous THF (2.0 mL) at room temperature for 48 h. Benzyl amine (109  $\mu\text{L}$ , 1.0 mmol) was added and the reaction was stirred at room temperature overnight. The crude residue (>95:5 dr) was purified by flash silica chromatography (95:5 Petrol : EtOAc,  $R_f$  0.14) to give desired compound (82.0 mg, 73%) as a white solid. mp: 79–80°C;  $[\alpha]_D^{20} = +215.4$  ( $c$  0.5,  $\text{CHCl}_3$ ); Chiral HPLC analysis, Chiralcel OD-H (90:10 hexane : IPA, flow rate 1 mL/min $^{-1}$ , 254 nm, 30 °C)  $t_R$  (major): 20.3 min,  $t_R$  (minor): 27.5 min, 99:1 er;  $v_{max}$  (film), 3338 (N-H), 1699 (C=O), 1648 (C=O), 1182 (C-F), 1152 (C-F), 1115 (C-F);  $^1\text{H NMR}$  ( $\text{CDCl}_3$ , 400 MHz)  $\delta_H$ : 2.59–2.67 (2H, m,  $\text{CH}_2\text{CO}$ ), 3.81 (3H, s,  $\text{CH}_3\text{O}$ ), 4.31 (1H, dd,  $J$  14.6, 5.8,  $\text{NHCH}_2\text{Ph}$ ), 4.47 (1H, dd,  $J$  14.6, 5.8,  $\text{NHCH}_2\text{Ph}$ ), 4.59–4.64 (1H, m,  $\text{CHCF}_3$ ), 4.87 (2H, s,  $\text{CH}_2\text{Ph}$ ), 4.84 (1H, d,  $J$  15.9,  $\text{CH}_2\text{Ph}$ ), 4.90 (1H, d,  $J$  15.8,  $\text{CH}_2\text{Ph}$ ), 5.70 (1H, t,  $J$  5.4,  $\text{NHCH}_2\text{Ph}$ ), 6.82 (1H, d,  $J$  7.8,  $\text{CH-Ar}$ ), 6.84–6.87 (1H, m,  $\text{CH-Ar}$ ), 6.95 (1H, d,  $J$  7.4,  $\text{CH-Ar}$ ), 7.08–7.12 (2H, m,  $\text{CH-Ar}$ ), 7.19–7.35 (11H, m,  $\text{CH-Ar}$ );  $^{19}\text{F}\{^1\text{H}\}$  NMR (376 MHz,  $\text{CDCl}_3$ )  $\delta_F$ : –65.7 (s,  $\text{CF}_3$ );  $^{13}\text{C}$  NMR ( $\text{CDCl}_3$ , 100 MHz)  $\delta_C$ : 32.9 ( $\text{CH}_2\text{CO}$ ), 44.0 ( $\text{CH}_2\text{Ph}$ ), 44.3 ( $\text{CH}_2\text{Ph}$ ), 45.8 (q,  $J_{\text{C-F}}$  24.5,  $\text{CHCF}_3$ ), 55.3 ( $\text{C}(3)$ ), 55.8 ( $\text{CH}_3\text{O}$ ), 110.2 ( $\text{CH-Ar}$ ), 113.3 ( $\text{CH-Ar}$ ), 114.3 ( $\text{CH-Ar}$ ), 119.9 (2 $\times$  $\text{CH-Ar}$ ), 122.3 (2 $\times$  $\text{CH-Ar}$ ), 126.2 ( $\text{CH-Ar}$ ), 126.7 (q,  $^1J_{\text{C-F}}$  280.3,  $\text{CF}_3$ ), 127.2 (2 $\times$  $\text{CH-Ar}$ ), 127.4 ( $\text{CH-Ar}$ ), 127.6 (2 $\times$  $\text{CH-Ar}$ ), 127.8 (2 $\times$  $\text{CH-Ar}$ ), 128.7 (2 $\times$  $\text{CH-Ar}$ ), 129.2 ( $\text{CH-Ar}$ ), 129.8 ( $\text{CH-Ar}$ ), 135.5 ( $\text{C-Ar}$ ), 137.8 ( $\text{C-Ar}$ ), 138.7 ( $\text{C-Ar}$ ), 143.2 ( $\text{C-Ar}$ ), 159.9 (MeOC-Ar), 169.0 (CON), 176.3 (CONHBn); HRMS (NSI $^+$ ) exact mass calcd. For  $\text{C}_{33}\text{H}_{30}\text{F}_3\text{N}_2\text{O}_3^+$  ( $\text{M}+\text{H}^+$ ) requires  $m/z$  559.2203, found  $m/z$  559.2193 (–1.8 ppm).

**(S)-N-benzyl-3-((R)-1-benzyl-2-oxo-3-(thiophen-2-yl)indolin-3-yl)-4,4,4-trifluorobutanamide (69)**

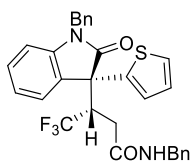

Following General Procedure **9**, 1-benzyl-3-(thiophen-2-yl)indolin-2-one (59.9 mg, 0.2 mmol), 4-nitrophenyl (*E*)-4,4,4-trifluorobut-2-enoate (52.2 mg, 0.2 mmol), (2*S*,3*R*)-HyperBTM (6.2 mg, 0.02 mmol) and DIPEA (35.0  $\mu$ L, 0.2 mmol) in anhydrous THF (2.0 mL) at room temperature for 48 h. Benzyl amine (109  $\mu$ L, 1.0 mmol) was added and the reaction was stirred at room temperature overnight. The crude residue (>95:5 dr) was purified by flash silica chromatography (5:1 Petrol : EtOAc,  $R_f$  0.14) to give desired compound (91.0 mg, 85%) as a white solid. mp: 136–138°C;  $[\alpha]_D^{20} = +215.0$  ( $c$  0.5,  $\text{CHCl}_3$ ); Chiral HPLC analysis, Chiralcel OD-H (93:7 hexane : IPA, flow rate 1 mL/min<sup>-1</sup>, 254 nm, 30 °C)  $t_R$  (major): 45.2 min,  $t_R$  (minor): 57.4 min, 98:2 er;  $v_{\max}$  (film), 3280 (N-H), 1709 (C=O), 1647 (C=O), 1182 (C-F), 1151 (C-F), 1113 (C-F); **<sup>1</sup>H NMR (CDCl<sub>3</sub>, 400 MHz)**  $\delta_H$ : 2.66–2.82 (2H, m,  $\text{CH}_2\text{CO}$ ), 4.33 (1H, dd,  $J$  14.6, 5.4,  $\text{NHCH}_2\text{Ph}$ ), 4.45–4.50 (2H, m,  $\text{NHCH}_2\text{Ph}$ ,  $\text{CHCF}_3$ ), 4.85 (1H, d,  $J$  15.8,  $\text{CH}_2\text{Ph}$ ), 4.94 (1H, d,  $J$  15.8,  $\text{CH}_2\text{Ph}$ ), 5.87 (1H, t,  $J$  5.4,  $\text{NHCH}_2\text{Ph}$ ), 6.81 (1H, d,  $J$  7.8,  $\text{CH-Ar}$ ), 7.00 (1H, dd,  $J$  5.2, 3.7,  $\text{CH-Ar}$ ), 7.10–7.12 (1H, m,  $\text{CH-Ar}$ ), 7.20–7.36 (13H, m,  $\text{CH-Ar}$ ), 7.41 (1H, d,  $J$  7.1,  $\text{CH-Ar}$ ); **<sup>19</sup>F{<sup>1</sup>H} NMR (376 MHz, CDCl<sub>3</sub>)**  $\delta_F$ : –65.8 (s,  $\text{CF}_3$ ); **<sup>13</sup>C NMR (CDCl<sub>3</sub>, 100 MHz)**  $\delta_C$ : 32.8 ( $\text{CH}_2\text{CO}$ ), 44.0 ( $\text{CH}_2\text{Ph}$ ), 44.4 ( $\text{CH}_2\text{Ph}$ ), 47.1 (q,  $^2J_{\text{C-F}}$  24.9,  $\text{CHCF}_3$ ), 53.6 ( $\text{C}(3)$ ), 110.2 ( $\text{CH-Ar}$ ), 122.4 ( $\text{CH-Ar}$ ), 125.6 ( $\text{CH-Ar}$ ), 126.6 (q,  $^1J_{\text{C-F}}$  280.8,  $\text{CF}_3$ ), 126.3 ( $\text{CH-Ar}$ ), 127.2 (2 $\times$  $\text{CH-Ar}$ ), 127.6 ( $\text{CH-Ar}$ ), 127.7 (3 $\times$  $\text{CH-Ar}$ ), 127.9 (2 $\times$  $\text{CH-Ar}$ ), 128.0 ( $\text{CH-Ar}$ ), 128.7 (2 $\times$  $\text{CH-Ar}$ ), 128.8 (2 $\times$  $\text{CH-Ar}$ ), 129.6 ( $\text{C-Ar}$ ), 135.3 ( $\text{C-Ar}$ ), 137.8 ( $\text{C-Ar}$ ), 141.0 ( $\text{C-Ar}$ ), 142.9 ( $\text{C-Ar}$ ), 169.0 ( $\text{CON}$ ), 175.5 ( $\text{CONHBn}$ ); **HRMS (NSI<sup>+</sup>)** exact mass calcd. For  $\text{C}_{30}\text{H}_{25}\text{F}_3\text{N}_2\text{NaO}_2\text{S}^+$  ( $\text{M}+\text{Na}^+$ ) requires  $m/z$  535.1481, found  $m/z$  535.1468 (–2.2 ppm)

**(*S*)-*N*-benzyl-3-((*R*)-1-benzyl-2-oxo-3-phenylindolin-3-yl)-4,4-difluorobutanamide (76)**

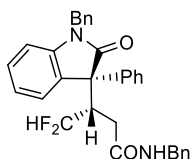

Following General Procedure **9**, 1-benzyl-3-phenylindolin-2-one (59.9 mg, 0.2 mmol), 4-nitrophenyl 4-nitrophenyl (*E*)-4,4-difluorobut-2-enoate (48.6 mg, 0.2 mmol), (2*S*,3*R*)-HyperBTM (6.2 mg, 0.02 mmol) and DIPEA (35.0  $\mu$ L, 0.2 mmol) in anhydrous THF (2.0 mL) at room temperature for 48 h. Benzyl amine (109  $\mu$ L, 1.0 mmol) was added and the reaction was stirred at room temperature overnight. The crude residue (>95:5 dr) was purified by flash silica chromatography (5:1 Petrol : EtOAc,  $R_f$  0.15) to give desired compound (68.0 mg, 67%) as a white solid. mp: 61–63°C;  $[\alpha]_D^{20} = +132.1$  ( $c$  0.6,  $\text{CHCl}_3$ ); Chiral HPLC analysis, Chiralcel IC (80:20 hexane : IPA, flow rate 1.5 mL/min<sup>-1</sup>, 254 nm, 40 °C)  $t_R$  (major): 34.6 min,  $t_R$  (minor): 41.7 min, 93:7 er;  $v_{\max}$  (film), 2862 (C-H), 1748 (C=O), 1734 (C=O); **<sup>1</sup>H NMR (CDCl<sub>3</sub>, 400 MHz)**  $\delta_H$ : 2.37–2.52 (2H, m,  $\text{CH}_2\text{CO}$ ), 4.11–4.22 (1H, m,  $\text{CHCHF}_2$ ), 4.30 (1H, dd,  $J$  14.6, 5.8,  $\text{NHCH}_2\text{Ph}$ ), 4.45 (1H, dd,  $J$  14.6, 5.8,  $\text{NHCH}_2\text{Ph}$ ), 4.91 (2H, s,  $\text{CH}_2\text{Ph}$ ), 5.60–5.89 (2H, m,  $\text{NHCH}_2\text{Ph}$ ,  $\text{CHCHF}_2$ ), 6.84 (1H, d,  $J$  7.8,  $\text{CH-Ar}$ ), 7.09–7.13 (1H, m,  $\text{CH-Ar}$ ), 7.21–7.38 (15H, m,  $\text{CH-Ar}$ ), 7.47–7.49 (2H, m,  $\text{CH-Ar}$ ) ppm; **<sup>19</sup>F{<sup>1</sup>H} NMR (376 MHz, CDCl<sub>3</sub>)**  $\delta_F$ : –114.6 (d,  $J$  284.9,  $\text{CHCHF}_2$ ), –121.2 (d,  $J$  284.5 Hz,  $\text{CHCHF}_2$ ); **<sup>13</sup>C NMR (CDCl<sub>3</sub>, 100 MHz)**  $\delta_C$ : 32.2 ( $\text{CH}_2\text{CO}$ ), 43.9 ( $\text{CH}_2\text{Ph}$ ), 44.2 ( $\text{CH}_2\text{Ph}$ ), 45.7 (t,  $^2J_{\text{C-F}}$  19.3,  $\text{CHCHF}_2$ ), 56.4 ( $\text{C}(3)$ ), 110.0 ( $\text{CH-Ar}$ ), 116.9 (t,  $^1J_{\text{C-F}}$  243.2,  $\text{CHF}_2$ ), 122.6 ( $\text{CH-Ar}$ ), 125.9 ( $\text{CH-Ar}$ ), 127.3 (2 $\times$  $\text{CH-Ar}$ ), 127.5 (2 $\times$  $\text{CH-Ar}$ ), 127.6 ( $\text{CH-Ar}$ ), 127.7 ( $\text{CH-Ar}$ ), 127.8 (2 $\times$  $\text{CH-Ar}$ ), 128.1 ( $\text{CH-Ar}$ ), 128.6 ( $\text{CH-Ar}$ ), 128.7 (2 $\times$  $\text{CH-Ar}$ ), 128.7 (2 $\times$  $\text{CH-Ar}$ ), 129.0 (2 $\times$  $\text{CH-Ar}$ ), 129.0 ( $\text{C-Ar}$ ), 135.6 ( $\text{C-Ar}$ ), 137.6 ( $\text{C-Ar}$ ), 137.9 ( $\text{C-Ar}$ ), 143.0 ( $\text{C-Ar}$ ), 169.9 ( $\text{CON}$ ), 176.8 ( $\text{CONHBn}$ ); **HRMS (NSI<sup>+</sup>)** exact mass calcd. For  $\text{C}_{32}\text{H}_{29}\text{F}_2\text{N}_2\text{O}_2^+$  ( $\text{M}+\text{H}^+$ ) requires  $m/z$  511.2192, found  $m/z$  511.2182 (–1.9 ppm).

(*S*)-*N*-benzyl-3-((*R*)-1-benzyl-2-oxo-3-phenylindolin-3-yl)-4-chloro-4,4-difluorobutanamide (77)

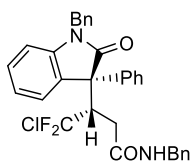

Following General Procedure 9, 1-benzyl-3-phenylindolin-2-one (59.9 mg, 0.2 mmol), 4-nitrophenyl (*E*)-4-chloro-4,4-difluorobut-2-enoate (55.4 mg, 0.2 mmol), (2*S*,3*R*)-HyperBTM (6.2 mg, 0.02 mmol) and DIPEA (35.0  $\mu$ L, 0.2 mmol) in anhydrous THF (2.0 mL) at room temperature for 48 h. Benzyl amine (109  $\mu$ L, 1.0 mmol) was added and the reaction was stirred at room temperature overnight. The crude residue (95:5 dr) was purified by flash silica chromatography (5:1 Petrol : EtOAc,  $R_f$  0.14) to give desired compound (92.0 mg, 84%) as a white solid. mp: 78–79°C;  $[\alpha]_D^{20} = +138.3$  ( $c$  1.6, CHCl<sub>3</sub>); Chiral HPLC analysis, Chiralcel OD-H (93:7 hexane : IPA, flow rate 1.0 mL/min<sup>-1</sup>, 254 nm, 30 °C)  $t_R$  (major): 34.4 min,  $t_R$  (minor): 47.4 min, 98:2 er;  $v_{max}$  (film), 3316 (N-H), 1701 (C=O), 1655 (C=O), 1192 (C-F), 959 (C-Cl); <sup>1</sup>H NMR (CDCl<sub>3</sub>, 400 MHz)  $\delta_H$ : 2.64–2.77 (2H, m, CH<sub>2</sub>CO), 4.11–4.22 (1H, m, CHCHF<sub>2</sub>), 4.25 (1H, dd,  $J$  14.6, 5.3, NHCH<sub>2</sub>Ph), 4.44 (1H, dd,  $J$  14.6, 5.9, NHCH<sub>2</sub>Ph), 4.78–4.90 (3H, m, CH<sub>2</sub>Ph, CHCF<sub>2</sub>Cl), 5.72 (1H, t,  $J$  5.4, NHCH<sub>2</sub>Ph), 6.82 (1H, d,  $J$  7.8, CH-Ar), 7.09–7.13 (1H, m, CH-Ar), 7.16–7.21 (4H, m, CH-Ar), 7.23–7.35 (11H, m, CH-Ar), 7.49–7.54 (2H, m, CH-Ar); <sup>19</sup>F{<sup>1</sup>H} NMR (376 MHz, CDCl<sub>3</sub>)  $\delta_F$ : -49.3 (d,  $J$  163.0, CHCClF<sub>2</sub>), -51.9 (d,  $J$  163.0, CHCClF<sub>2</sub>); <sup>13</sup>C NMR (CDCl<sub>3</sub>, 100 MHz)  $\delta_C$ : 34.3 (CH<sub>2</sub>CO), 44.1 (CH<sub>2</sub>Ph), 44.3 (CH<sub>2</sub>Ph), 51.8 (t, <sup>2</sup> $J_{C-F}$  20.5, CHF<sub>2</sub>Cl), 56.8 (C(3)), 110.2 (CH-Ar), 122.2 (CH-Ar), 126.7 (CH-Ar), 127.2 (3 $\times$ CH-Ar), 127.6 (2 $\times$ CH-Ar), 127.9 (2 $\times$ CH-Ar), 128.0 (2 $\times$ CH-Ar), 128.4 (CH-Ar), 128.7 (4 $\times$ CH-Ar), 128.9 (2 $\times$ CH-Ar), 129.1 (C-Ar), 130.3 (t, <sup>1</sup> $J_{C-F}$  296.1, CClF<sub>2</sub>), 135.5 (C-Ar), 137.4 (C-Ar), 137.8 (C-Ar), 143.2 (C-Ar), 169.1 (CON), 176.6 (CONHBn); HRMS (NSI<sup>+</sup>) exact mass calcd. For C<sub>32</sub>H<sub>28</sub>ClF<sub>2</sub>N<sub>2</sub>O<sub>2</sub><sup>+</sup> (M+H<sup>+</sup>) requires  $m/z$  545.1802, found  $m/z$  545.1792 (-1.8 ppm).

(*S*)-*N*-benzyl-3-((*R*)-1-benzyl-2-oxo-3-phenylindolin-3-yl)-4-bromo-4,4-difluorobutanamide (78)

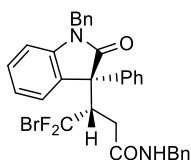

Following General Procedure 9, 1-benzyl-3-phenylindolin-2-one (59.9 mg, 0.2 mmol), 4-nitrophenyl (*E*)-4-bromo-4,4-difluorobut-2-enoate (64.4 mg, 0.2 mmol), (2*S*,3*R*)-HyperBTM (6.2 mg, 0.02 mmol) and DIPEA (35.0  $\mu$ L, 0.2 mmol) in anhydrous THF (2.0 mL) at room temperature for 48 h. Benzyl amine (109  $\mu$ L, 1.0 mmol) was added and the reaction was stirred at room temperature overnight. The crude residue (95:5 dr) was purified by flash silica chromatography (5:1 Petrol : EtOAc,  $R_f$  0.15) to give desired compound (99.0 mg, 84%) as a white solid. mp: 86–87°C;  $[\alpha]_D^{20} = +170.1$  ( $c$  1.6, CHCl<sub>3</sub>); Chiral HPLC analysis, Chiralcel OD-H (93:7 hexane : IPA, flow rate 1.0 mL/min<sup>-1</sup>, 254 nm, 30 °C)  $t_R$  (major): 35.7 min,  $t_R$  (minor): 47.5 min, 99:1 er;  $v_{max}$  (film), 3312 (N-H), 1699 (C=O), 1653 (C=O), 1190 (C-F), 889 (C-Br); <sup>1</sup>H NMR (CDCl<sub>3</sub>, 400 MHz)  $\delta_H$ : 2.63–2.78 (2H, m, CH<sub>2</sub>CO), 4.25 (1H, dd,  $J$  14.5, 5.2, NHCH<sub>2</sub>Ph), 4.44 (1H, dd,  $J$  14.5, 5.8, NHCH<sub>2</sub>Ph), 4.82–4.91 (3H, m, CH<sub>2</sub>Ph, CHCF<sub>2</sub>Br), 5.57 (1H, t,  $J$  5.4, NHCH<sub>2</sub>Ph), 6.81 (1H, d,  $J$  7.8, CH-Ar), 7.09–7.13 (1H, m, CH-Ar), 7.15–7.34 (15H, m, CH-Ar), 7.51 (2H, d,  $J$  5.5, CH-Ar); <sup>19</sup>F{<sup>1</sup>H} NMR (376 MHz, CDCl<sub>3</sub>)  $\delta_F$ : -42.75 (d,  $J$  158.7, CHCF<sub>2</sub>Br), -45.67 (d,  $J$  159.2, CHCF<sub>2</sub>Br); <sup>13</sup>C NMR (CDCl<sub>3</sub>, 100 MHz)  $\delta_C$ : 34.7 (CH<sub>2</sub>CO), 44.1 (CH<sub>2</sub>Ph), 44.3 (CH<sub>2</sub>Ph),

53.4 (t,  $^2J_{C-F}$  20.5,  $CHF_2Br$ ), 56.9 (C(3)), 110.2 (CH-Ar), 123.3 (t,  $^1J_{C-F}$  308.4,  $CBrF_2$ ), 122.1 (CH-Ar), 126.8 (CH-Ar), 127.1 (CH-Ar), 127.2 (2×CH-Ar), 127.6 (2×CH-Ar), 128.0 (4×CH-Ar), 128.4 (CH-Ar), 128.7 (4×CH-Ar), 128.9 (2×CH-Ar), 129.1 (C-Ar), 135.5 (C-Ar), 137.3 (C-Ar), 137.7 (C-Ar), 143.2 (C-Ar), 169.1 (CON), 176.6 (CONHBn); **HRMS (NSI<sup>+</sup>)** exact mass calcd. For  $C_{32}H_{28}BrF_2N_2O_2^+$  (M+H<sup>+</sup>) requires m/z 589.1297, found m/z 589.1282 (−2.6 ppm).

**(S)-N-benzyl-3-((R)-1-benzyl-2-oxo-3-phenylindolin-3-yl)butanamide (79)**

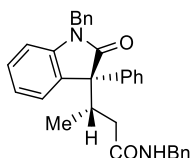

Following General Procedure **9**, 1-benzyl-3-phenylindolin-2-one (59.9 mg, 0.2 mmol), 4-nitrophenyl (E)-but-2-enoate (41.4 mg, 0.2 mmol), (2*S*,3*R*)-HyperBTM (12.3 mg, 0.04 mmol) and DIPEA (35.0  $\mu$ L, 0.2 mmol) in anhydrous THF (2.0 mL) at room temperature for 72 h. Benzyl amine (109  $\mu$ L, 1.0 mmol) was added and the reaction was stirred at room temperature overnight. The crude residue (86:14 dr<sub>5ah:5ah</sub>) was purified by flash silica chromatography (4:1 Petrol : EtOAc,  $R_f$  0.14) to give desired compound of a mixture of isomers (81.0 mg, 85%) as a white solid. mp: 123–124°C;  $[\alpha]_D^{20} = +29.6$  (c 0.6,  $CHCl_3$ ); Chiral HPLC analysis, Chiralcel OD-H (93:7 hexane : IPA, flow rate 1.0 mL/min<sup>-1</sup>, 254 nm, 30 °C)  $t_R$  51.8, 66.3 min, 86:14 er;  $\nu_{max}$  (film), 2862 (C-H), 1748 (C=O), 1734 (C=O); **<sup>1</sup>H NMR (CDCl<sub>3</sub>, 400 MHz)**  $\delta_H$ : 0.85 (3H, d,  $J$  6.6,  $CH_3$ ), 2.02 (1H, dd,  $J$  13.9, 11.3,  $CH_2CO$ ), 3.44–3.51 (1H, m,  $CH$ ), 4.40 (2H, dd,  $J$  8.9, 5.7,  $NHCH_2Ph$ ), 4.89 (1H, d,  $J$  15.6,  $NCH_2Ph$ ), 4.96 (1H, d,  $J$  15.6,  $NCH_2Ph$ ), 5.62 (1H, t,  $J$  5.4,  $NHCH_2Ph$ ), 5.74 (1H, t,  $J$  5.5,  $NHCH_2Ph$ ), 6.84 (1H, d,  $J$  7.8,  $CH-Ar$ ), 7.08–7.12 (1H, m,  $CH-Ar$ ), 7.23–7.37 (15H, m,  $CH-Ar$ ), 7.51–7.53 (2H, m,  $CH-Ar$ ); **<sup>13</sup>C NMR (CDCl<sub>3</sub>, 100 MHz)**  $\delta_C$ : 15.1 ( $CH_3$ ), 38.3 ( $CH$ ), 39.2 ( $CH_2CO$ ), 43.7 ( $CH_2Ph$ ), 44.0 ( $CH_2Ph$ ), 60.3 (C(3)), 109.5 (CH-Ar), 122.4 (CH-Ar), 125.7 (CH-Ar), 127.4 (2×CH-Ar), 127.5 (2×CH-Ar), 127.6 (2×CH-Ar), 127.8 (2×CH-Ar), 128.4 (CH-Ar), 128.7 (2×CH-Ar), 128.8 (4×CH-Ar), 129.7 (C-Ar), 135.9 (C-Ar), 138.2 (C-Ar), 138.7 (C-Ar), 143.4 (C-Ar), 171.3 (CON), 177.7 (CONHBn), 177.5 (CONHBn); **HRMS (NSI<sup>+</sup>)** exact mass calcd. For  $C_{32}H_{31}N_2O_2^+$  (M+H<sup>+</sup>) requires m/z 475.2380, found m/z 475.2373 (−1.5 ppm).

**(R)-N-benzyl-3-((R)-1-benzyl-2-oxo-3-phenylindolin-3-yl)-3-phenylpropanamide (80major) and (S)-N-benzyl-3-((R)-1-benzyl-2-oxo-3-phenylindolin-3-yl)-3-phenylpropanamide (80minor)**

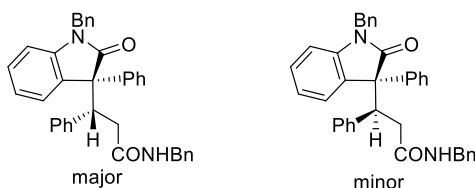

Following General Procedure **9**, 1-benzyl-3-phenylindolin-2-one (59.9 mg, 0.2 mmol), 4-nitrophenyl cinnamate (53.8 mg, 0.2 mmol), (2*S*,3*R*)-HyperBTM (12.3 mg, 0.04 mmol) and DIPEA (35.0  $\mu$ L, 0.2 mmol) in anhydrous THF (2.0 mL) at room temperature for 72 h. Benzyl amine (109  $\mu$ L, 1.0 mmol) was added and the reaction was stirred at room temperature overnight. The crude residue (50:50 dr) was purified by flash silica chromatography (4:1 Petrol : EtOAc,  $R_f$  0.12) to give desired compound of a mixture of isomers (87.0 mg, 81%) as a white solid. mp: 123–124°C;  $[\alpha]_D^{20} = +29.6$  (c 0.6,  $CHCl_3$ ).

**80<sub>major</sub>**: Chiral HPLC analysis, Chiralcel IC (90:10 hexane : IPA, flow rate 0.5 mL/min<sup>-1</sup>, 254 nm, 40 °C)  $t_R$  49.1 min, 128.1, 99:1 er;  $\nu_{max}$  (film), 3325 (N-H), 1701 (C=O), 1647 (C=O); **<sup>1</sup>H NMR (CDCl<sub>3</sub>, 400**

**MHz**)  $\delta_{\text{H}}$ : 2.77–2.92 (1H, m,  $\text{CH}_2\text{CO}$ ), 3.23 (1H, dd,  $J$  15.0, 11.5,  $\text{CH}_2\text{CO}$ ), 4.25–4.38 (2H, m,  $\text{NHCH}_2\text{Ph}$ ), 4.57 (1H, dd,  $J$  11.3, 3.4,  $\text{CHPh}$ ), 4.81 (1H, d,  $J$  16.0,  $\text{NCH}_2\text{Ph}$ ), 4.94 (1H, d,  $J$  15.8,  $\text{NCH}_2\text{Ph}$ ), 5.74 (1H, t,  $J$  5.5,  $\text{NHCH}_2\text{Ph}$ ), 6.43 (2H, d,  $J$  7.3,  $\text{CH-Ar}$ ), 6.80 (2H, dd,  $J$  6.6, 1.6,  $\text{CH-Ar}$ ), 6.94–7.29 (14H, m,  $\text{CH-Ar}$ ), 7.35–7.36 (1H, m,  $\text{CH-Ar}$ ), 7.39–7.43 (2H, m,  $\text{CH-Ar}$ ), 7.54–7.56 (1H, m,  $\text{CH-Ar}$ ), 7.69–7.73 (2H, m,  $\text{CH-Ar}$ );  $^{13}\text{C}$  NMR ( $\text{CDCl}_3$ , 100 MHz)  $\delta_{\text{C}}$ : 38.5 ( $\text{CH}_2\text{CO}$ ), 43.2 ( $\text{CH}_2\text{Ph}$ ), 43.8 ( $\text{CH}_2\text{Ph}$ ), 49.6 ( $\text{CHPh}$ ), 60.9 ( $\text{C}(3)$ ), 110.0 ( $\text{CH-Ar}$ ), 122.6 ( $\text{CH-Ar}$ ), 124.5 ( $\text{CH-Ar}$ ), 126.5 ( $\text{CH-Ar}$ ), 126.9 ( $\text{CH-Ar}$ ), 127.0 ( $2\times\text{CH-Ar}$ ), 127.0 ( $2\times\text{CH-Ar}$ ), 127.2 ( $2\times\text{CH-Ar}$ ), 127.5 ( $\text{CH-Ar}$ ), 127.9 ( $2\times\text{CH-Ar}$ ), 128.4 ( $2\times\text{CH-Ar}$ ), 128.5 ( $2\times\text{CH-Ar}$ ), 128.7 ( $2\times\text{CH-Ar}$ ), 128.9 ( $\text{CH-Ar}$ ), 129.1 ( $2\times\text{CH-Ar}$ ), 129.6 ( $\text{CH-Ar}$ ), 129.6 ( $\text{C-Ar}$ ), 135.1 ( $\text{C-Ar}$ ), 137.8 ( $\text{C-Ar}$ ), 137.9 ( $\text{C-Ar}$ ), 139.3 ( $\text{C-Ar}$ ), 144.0 ( $\text{C-Ar}$ ), 171.5 ( $\text{CON}$ ), 177.5 ( $\text{CONHBn}$ ); **HRMS** ( $\text{NSI}^+$ ) exact mass calcd. For  $\text{C}_{37}\text{H}_{33}\text{N}_2\text{O}_2^+$  ( $\text{M}+\text{H}^+$ ) requires  $m/z$  537.2537, found  $m/z$  537.2527 (–1.8 ppm).

**80<sub>minor</sub>**: Chiral HPLC analysis, Chiralcel IC (90:10 hexane : IPA, flow rate 0.5 mL/min<sup>-1</sup>, 254 nm, 40 °C)  $t_{\text{R}}$  173.9 min, 185.9, 79:21 er;  $v_{\text{max}}$  (film), 3304 ( $\text{N-H}$ ), 1701 ( $\text{C=O}$ ), 1647 ( $\text{C=O}$ );  **$^1\text{H}$ NMR** ( $\text{CDCl}_3$ , 400 MHz)  $\delta_{\text{H}}$ : 2.77–2.92 (2H, m,  $\text{CH}_2\text{CO}$ ), 3.23 (1H, dd,  $J$  15.0, 11.5,  $\text{CH}_2\text{CO}$ ), 4.01 (1H, dd,  $J$  15.0, 4.9,  $\text{NHCH}_2\text{Ph}$ ), 4.09 (1H, dd,  $J$  14.9, 5.0,  $\text{NHCH}_2\text{Ph}$ ), 4.25–4.38 (1H, m,  $\text{CHPh}$ ), 4.66–4.71 (2H, m,  $\text{NCH}_2\text{Ph}$ ), 5.46 (1H, t,  $J$  5.5,  $\text{NHCH}_2\text{Ph}$ ), 6.36–6.40 (1H, m,  $\text{CH-Ar}$ ), 6.47 (1H, d,  $J$  7.2,  $\text{CH-Ar}$ ), 6.75 (2H, dd,  $J$  6.9, 1.4,  $\text{CH-Ar}$ ), 6.94–7.29 (14H, m,  $\text{CH-Ar}$ ), 7.30–7.32 (1H, m,  $\text{CH-Ar}$ ), 7.39–7.43 (2H, m,  $\text{CH-Ar}$ ), 7.46–7.48 (1H, m,  $\text{CH-Ar}$ ), 7.69–7.73 (2H, m,  $\text{CH-Ar}$ );  $^{13}\text{C}$  NMR ( $\text{CDCl}_3$ , 100 MHz)  $\delta_{\text{C}}$ : 36.8 ( $\text{CH}_2\text{CO}$ ), 43.2 ( $\text{CH}_2\text{Ph}$ ), 43.7 ( $\text{CH}_2\text{Ph}$ ), 49.0 ( $\text{CHPh}$ ), 60.8 ( $\text{C}(3)$ ), 109.1 ( $\text{CH-Ar}$ ), 122.0 ( $\text{CH-Ar}$ ), 124.5 ( $\text{CH-Ar}$ ), 126.5 ( $\text{CH-Ar}$ ), 126.6 ( $\text{CH-Ar}$ ), 127.0 ( $2\times\text{CH-Ar}$ ), 127.0 ( $2\times\text{CH-Ar}$ ), 127.2 ( $2\times\text{CH-Ar}$ ), 127.4 ( $\text{CH-Ar}$ ), 127.7 ( $\text{CH-Ar}$ ), 127.8 ( $2\times\text{CH-Ar}$ ), 128.3 ( $2\times\text{CH-Ar}$ ), 128.4 ( $2\times\text{CH-Ar}$ ), 128.7 ( $2\times\text{CH-Ar}$ ), 128.9 ( $2\times\text{CH-Ar}$ ), 129.4 ( $2\times\text{CH-Ar}$ ), 132.5 ( $\text{C-Ar}$ ), 135.4 ( $\text{C-Ar}$ ), 137.8 ( $\text{C-Ar}$ ), 138.1 ( $\text{C-Ar}$ ), 141.4 ( $\text{C-Ar}$ ), 170.6 ( $\text{CON}$ ), 176.7 ( $\text{CONHBn}$ ); **HRMS** ( $\text{NSI}^+$ ) exact mass calcd. For  $\text{C}_{37}\text{H}_{33}\text{N}_2\text{O}_2^+$  ( $\text{M}+\text{H}^+$ ) requires  $m/z$  537.2537, found  $m/z$  537.2527 (–1.8 ppm).

**(R)-N-benzyl-3-((R)-1-benzyl-2-oxo-3-phenylindolin-3-yl)-3-(p-tolyl)propanamide (S3<sub>major</sub>) and (S)-N-benzyl-3-((R)-1-benzyl-2-oxo-3-phenylindolin-3-yl)-3-(p-tolyl)propanamide (S3<sub>minor</sub>)**

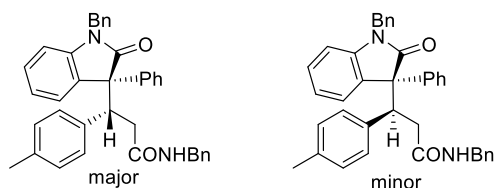

Following General Procedure 9, 1-benzyl-3-phenylindolin-2-one (59.9 mg, 0.2 mmol), 4-nitrophenyl (*E*)-3-(*p*-tolyl)acrylate (56.7 mg, 0.2 mmol), (2*S*,3*R*)-HyperBTM (12.3 mg, 0.04 mmol) and DIPEA (35.0  $\mu\text{L}$ , 0.2 mmol) in anhydrous THF (2.0 mL) at room temperature for 72 h. Benzyl amine (109  $\mu\text{L}$ , 1.0 mmol) was added and the reaction was stirred at room temperature overnight. The crude residue (59:41 dr) was purified by flash silica chromatography (67:33 Petrol : EtOAc,  $R_f$  0.21<sub>major</sub> and 0.29<sub>minor</sub>) to give:

**S3<sub>major</sub>** (16.4 mg, 15%) as a white solid. mp: 172–173°C;  $[\alpha]_{\text{D}}^{20} = +42.3$  ( $c$  0.8,  $\text{CHCl}_3$ );  $v_{\text{max}}$  (film), 1711 ( $\text{C=O}$ ), 1647 ( $\text{C=O}$ );  **$^1\text{H}$ NMR** ( $\text{CDCl}_3$ , 400 MHz)  $\delta_{\text{H}}$ : 2.34 (3H, s,  $\text{CH}_3$ ), 2.74–2.86 (2H, m,  $\text{CH}_2\text{CO}$ ), 4.09 (1H, dd,  $J$  5.1, 14.9,  $\text{NHCH}_2\text{Ph}$ ), 4.24 (1H, d,  $J$  16.1,  $\text{NCH}_2\text{Ph}$ ), 4.34 (1H, dd,  $J$  14.9, 5.0,  $\text{NHCH}_2\text{Ph}$ ), 4.60 (1H, dd,  $J$  3.3, 11.8,  $\text{CHAr}$ ), 4.89 (1H, d,  $J$  16.1,  $\text{NCH}_2\text{Ph}$ ), 5.34 (1H, t,  $J$  5.4,  $\text{NHCH}_2\text{Ph}$ ), 6.45–6.49 (3H, m,  $\text{CH-Ar}$ ), 6.75–6.77 (2H, m,  $\text{CH-Ar}$ ), 6.80–6.82 (2H, m,  $\text{CH-Ar}$ ), 6.89–6.91 (2H, m,  $\text{CH-Ar}$ ), 7.06–7.09 (2H, m,  $\text{CH-Ar}$ ), 7.14–7.24 (6H, m,  $\text{CH-Ar}$ ), 7.34–7.36 (1H, m,  $\text{CH-Ar}$ ), 7.39–7.43 (2H, m,

*CH*-Ar), 7.53–7.55 (1H, m, *CH*-Ar), 7.69–7.71 (1H, m, *CH*-Ar);  $^{13}\text{C}$  NMR ( $\text{CDCl}_3$ , 100 MHz)  $\delta_{\text{C}}$ : 21.3 ( $\text{CH}_3$ ), 38.6 ( $\text{CH}_2\text{CO}$ ), 43.3 ( $\text{CH}_2\text{Ph}$ ), 43.8 ( $\text{CH}_2\text{Ph}$ ), 49.2 ( $\text{CHAr}$ ), 60.9 ( $\text{C}(3)$ ), 109.9 (*CH*-Ar), 121.9 (*CH*-Ar), 126.6 (2 $\times$ *CH*-Ar), 127.0 (*CH*-Ar), 127.2 (*CH*-Ar), 127.3 (*CH*-Ar), 127.8 (*CH*-Ar), 127.9 (2 $\times$ *CH*-Ar), 128.36 (2 $\times$ *CH*-Ar), 128.40 (2 $\times$ *CH*-Ar), 128.8 (*CH*-Ar), 128.9 (2 $\times$ *CH*-Ar), 129.0 (2 $\times$ *CH*-Ar), 129.4 (2 $\times$ *CH*-Ar), 134.7 (*C*-Ar), 135.1 (*C*-Ar), 136.9 (*C*-Ar), 137.8 (*C*-Ar), 137.9 (*C*-Ar), 144.0 (*C*-Ar), 170.7 ( $\text{CON}$ ), 176.7 ( $\text{CONHBn}$ ); HRMS ( $\text{NSI}^+$ ) exact mass calcd. For  $\text{C}_{38}\text{H}_{34}\text{N}_2\text{NaO}_2^+$  ( $\text{M}+\text{Na}^+$ ) requires  $m/z$  537.2512, found  $m/z$  537.2502 (–1.8 ppm).

**S3<sub>minor</sub>** (12.1 mg, 11%) as a white solid. mp: 172–173°C;  $[\alpha]_{\text{D}}^{20} = +126.0$  ( $c$  0.1,  $\text{CHCl}_3$ );  $\nu_{\text{max}}$  (film), 1690 ( $\text{C}=\text{O}$ ), 1647 ( $\text{C}=\text{O}$ );  $^1\text{H}$ NMR ( $\text{CDCl}_3$ , 400 MHz)  $\delta_{\text{H}}$ : 2.25 (3H, s,  $\text{CH}_3$ ), 2.83 (1H, dd,  $J$  3.5, 14.8 Hz,  $\text{CH}_2\text{CO}$ ), 3.19 (1H, dd,  $J$  11.6, 14.8,  $\text{CH}_2\text{CO}$ ), 4.03 (1H, dd,  $J$  4.9, 15.1 Hz,  $\text{NHCH}_2\text{Ph}$ ), 4.37 (1H, dd,  $J$  6.7, 15.1 Hz,  $\text{NHCH}_2\text{Ph}$ ), 4.52 (1H, dd,  $J$  3.5, 11.6,  $\text{CHAr}$ ), 4.77 (1H, d,  $J$  15.9,  $\text{NCH}_2\text{Ph}$ ), 4.89 (1H, d,  $J$  15.9,  $\text{NCH}_2\text{Ph}$ ), 5.66 (1H, br,  $\text{NHCH}_2\text{Ph}$ ), 6.38–6.40 (1H, m, *CH*-Ar), 6.79–6.83 (4H, m, *CH*-Ar), 6.97–7.04 (5H, m, *CH*-Ar), 7.15–7.19 (3H, m, *CH*-Ar), 7.24–7.31 (5H, m, *CH*-Ar), 7.38–7.42 (2H, m, *CH*-Ar), 7.45–7.47 (1H, m, *CH*-Ar), 7.67–7.69 (2H, m, *CH*-Ar);  $^{13}\text{C}$  NMR ( $\text{CDCl}_3$ , 100 MHz)  $\delta_{\text{C}}$ : 21.1 ( $\text{CH}_3$ ), 36.9 ( $\text{CH}_2\text{CO}$ ), 43.2 ( $\text{CH}_2\text{Ph}$ ), 43.7 ( $\text{CH}_2\text{Ph}$ ), 48.6 ( $\text{CHAr}$ ), 60.9 ( $\text{C}(3)$ ), 109.1 (*CH*-Ar), 122.5 (*CH*-Ar), 124.5 (*CH*-Ar), 127.03 (2 $\times$ *CH*-Ar), 127.05 (*CH*-Ar), 127.1 (2 $\times$ *CH*-Ar), 127.2 (2 $\times$ *CH*-Ar), 127.3 (*CH*-Ar), 127.4 (*CH*-Ar), 127.6 (*CH*-Ar), 128.4 (2 $\times$ *CH*-Ar), 128.5 (2 $\times$ *CH*-Ar), 128.6 (2 $\times$ *CH*-Ar), 129.1 (2 $\times$ *CH*-Ar), 129.2 (2 $\times$ *CH*-Ar), 132.5 (*C*-Ar), 134.6 (*C*-Ar), 135.4 (*C*-Ar), 136.3 (*C*-Ar), 138.1 (*C*-Ar), 139.4 (*C*-Ar), 141.5 (*C*-Ar), 171.6 ( $\text{CON}$ ), 177.6 ( $\text{CONHBn}$ ); HRMS ( $\text{NSI}^+$ ) exact mass calcd. For  $\text{C}_{38}\text{H}_{34}\text{N}_2\text{NaO}_2^+$  ( $\text{M}+\text{Na}^+$ ) requires  $m/z$  537.2512, found  $m/z$  537.2505 (–1.3 ppm).

**(*R*)-*N*-benzyl-3-((*R*)-1-benzyl-2-oxo-3-phenylindolin-3-yl)-3-(4-nitrophenyl)propanamide (S4<sub>major</sub>) and (*S*)-*N*-benzyl-3-((*R*)-1-benzyl-2-oxo-3-phenylindolin-3-yl)-3-(4-nitrophenyl)propanamide (S4<sub>minor</sub>)**

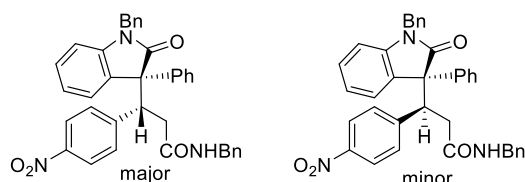

Following General Procedure 9, 1-benzyl-3-phenylindolin-2-one (59.9 mg, 0.2 mmol), 4-nitrophenyl (*E*)-3-(4-nitrophenyl)acrylate (62.9 mg, 0.2 mmol), (*2S,3R*)-HyperBTM (12.3 mg, 0.04 mmol) and DIPEA (35.0  $\mu\text{L}$ , 0.2 mmol) in anhydrous THF (2.0 mL) at room temperature for 72 h. Benzyl amine (109  $\mu\text{L}$ , 1.0 mmol) was added and the reaction was stirred at room temperature overnight. The crude residue (52:48 dr) was purified by flash silica chromatography (67:33 Petrol : EtOAc,  $R_f$  0.19<sub>major</sub> and 0.24<sub>minor</sub>) to give:

**S4<sub>major</sub>** (31.8 mg, 30%) as a white solid. mp: 209–210°C;  $[\alpha]_{\text{D}}^{20} = +93.6$  ( $c$  0.5,  $\text{CHCl}_3$ );  $\nu_{\text{max}}$  (film), 1705 ( $\text{C}=\text{O}$ ), 1647 ( $\text{C}=\text{O}$ );  $^1\text{H}$ NMR ( $\text{CDCl}_3$ , 400 MHz)  $\delta_{\text{H}}$ : 2.72 (1H, dd,  $J$  12.3, 14.3 Hz,  $\text{CH}_2\text{CO}$ ), 2.86 (1H, dd,  $J$  2.8, 14.3 Hz,  $\text{CH}_2\text{CO}$ ), 4.10 (1H, dd,  $J$  5.1, 14.7,  $\text{NHCH}_2\text{Ph}$ ), 4.27–4.33 (2H, m,  $\text{NCH}_2\text{Ph}+\text{NHCH}_2\text{Ph}$ ), 4.73–4.81 (2H, m,  $\text{NCH}_2\text{Ph}+\text{CHAr}$ ), 5.42 (1H, br,  $\text{NHCH}_2\text{Ph}$ ), 6.63–6.68 (3H, m, *CH*-Ar), 6.84–6.86 (2H, m, *CH*-Ar), 7.00–7.06 (4H, m, *CH*-Ar), 7.12–7.20 (4H, m, *CH*-Ar), 7.22–7.26 (1H, m, *CH*-Ar), 7.32–7.39 (2H, m, *CH*-Ar), 7.41–7.45 (2H, m, *CH*-Ar); 7.74–7.75 (1H, m, *CH*-Ar), 7.67–7.69 (2H, m, *CH*-Ar), 7.79–7.81 (2H, m, *CH*-Ar);  $^{13}\text{C}$  NMR ( $\text{CDCl}_3$ , 100 MHz)  $\delta_{\text{C}}$ : 37.8 ( $\text{CH}_2\text{CO}$ ), 43.5 ( $\text{CH}_2\text{Ph}$ ), 43.9 ( $\text{CH}_2\text{Ph}$ ), 49.1 ( $\text{CHPh}$ ), 60.2 ( $\text{C}(3)$ ), 110.0 (*CH*-Ar), 122.3 (*CH*-Ar), 123.0 (2 $\times$ *CH*-

Ar), 126.6 (CH-Ar), 127.0 (2×CH-Ar), 127.5 (2× CH-Ar), 127.57 (CH-Ar), 127.62 (CH-Ar), 127.8 (2×CH-Ar), 128.0 (CH-Ar), 128.1 (CH-Ar), 128.4 (2×CH-Ar), 128.6 (2×CH-Ar), 129.1 (2×CH-Ar), 129.4(CH-Ar), 130.3 (2×CH-Ar); **HRMS (NSI<sup>+</sup>)** exact mass calcd. For C<sub>37</sub>H<sub>31</sub>N<sub>3</sub>NaO<sub>4</sub><sup>+</sup> (M+Na<sup>+</sup>) requires m/z 604.2207, found m/z 604.2200 (−1.1 ppm).

**S4<sub>minor</sub>** (31.4 mg, 27%) as a white solid. mp: 192–193°C;  $[\alpha]_D^{20} = +115.6$  (c 0.1, CHCl<sub>3</sub>);  $\nu_{\max}$  (film), 1697 (C=O), 1645 (C=O); **<sup>1</sup>H NMR (CDCl<sub>3</sub>, 400 MHz)**  $\delta_H$ : 2.86 (1H, dd, *J* 3.6, 15.5, CH<sub>2</sub>CO), 3.25 (1H, dd, *J* 11.4, 15.5, CH<sub>2</sub>CO), 4.03 (1H, dd, *J* 5.0, 14.8, NHCH<sub>2</sub>Ph), 4.32 (1H, dd, *J* 6.6, 14.8, NHCH<sub>2</sub>Ph), 4.67 (1H, dd, *J* 3.6, 11.4, CHPh), 4.75 (1H, d, *J* 15.5, NCH<sub>2</sub>Ph), 4.87 (1H, d, *J* 15.5, NCH<sub>2</sub>Ph), 5.71 (1H, br, *J* 5.5, NHCH<sub>2</sub>Ph), 6.51–6.53 (1H, m, CH-Ar), 6.87–6.89 (2H, m, CH-Ar), 7.02–7.05 (2H, m, CH-Ar), 7.09–7.10 (2H, m, CH-Ar), 7.16–7.21 (4H, m, CH-Ar), 7.24–7.35 (5H, m, CH-Ar), 7.41–7.45 (2H, m, CH-Ar), 7.48–7.50 (1H, m, CH-Ar), 7.65–7.68 (2H, m, CH-Ar), 7.72–7.75 (2H, m, CH-Ar); **<sup>13</sup>C NMR (CDCl<sub>3</sub>, 100 MHz)**  $\delta_C$ : 36.1 (CH<sub>2</sub>CO), 43.4 (CH<sub>2</sub>Ph), 43.8 (CH<sub>2</sub>Ph), 48.6 (CHPh), 60.1 (C(3)), 109.3 (CH-Ar), 122.7 (2×CH-Ar), 122.9 (CH-Ar), 124.3 (CH-Ar), 126.9 (2×CH-Ar), 127.4 (2×CH-Ar), 127.5 (2×CH-Ar), 127.8 (CH-Ar), 127.9 (CH-Ar), 128.3 (CH-Ar), 128.5 (2×CH-Ar), 128.7 (2×CH-Ar), 129.3 (2×CH-Ar), 130.1 (2×CH-Ar), 131.7 (C-Ar), 135.1 (C-Ar), 137.8 (C-Ar), 138.5 (C-Ar), 141.2 (C-Ar), 145.9 (C-Ar), 146.7 (C-Ar), 170.6(CON), 176.9 (CONHBn); **HRMS (NSI<sup>+</sup>)** exact mass calcd. For C<sub>37</sub>H<sub>31</sub>N<sub>3</sub>NaO<sub>4</sub><sup>+</sup> (M+Na<sup>+</sup>) requires m/z 604.2207, found m/z 604.2198 (−1.4 ppm).

**Ethyl (S)-2-((R)-1-benzyl-2-oxo-3-phenylindolin-3-yl)-4-(benzylamino)-4-oxobutanoate (81<sub>major</sub>) and ethyl (R)-2-((R)-1-benzyl-2-oxo-3-phenylindolin-3-yl)-4-(benzylamino)-4-oxobutanoate (81<sub>minor</sub>)**

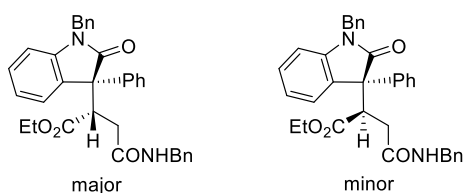

Following General Procedure **9**, 1-benzyl-3-phenylindolin-2-one (59.9 mg, 0.2 mmol), ethyl (4-nitrophenyl) fumarate (53.0 mg, 0.2 mmol), (2*S*,3*R*)-HyperBTM (6.2 mg, 0.02 mmol) and DIPEA (35.0  $\mu$ L, 0.2 mmol) in anhydrous THF (2.0 mL) at −40 °C for 48 h. Benzyl amine (109  $\mu$ L, 1.0 mmol) was added and the reaction was stirred at room temperature overnight. The crude residue (67:33 dr) was purified by flash silica chromatography (5:1 to 2:1 Petrol : EtOAc,  $R_f$  0.16<sub>major</sub> and  $R_f$  0.14<sub>minor</sub>) to give:

**81<sub>major</sub>**: (74.0 mg, 70%) as a white solid. mp: 83–85°C;  $[\alpha]_D^{20} = +202.3$  (c 0.8, CHCl<sub>3</sub>); Chiral HPLC analysis, Chiralcel OD-H (85:15 hexane : IPA, flow rate 1 mL/min<sup>−1</sup>, 254 nm, 30 °C)  $t_R$  (major): 23.5 min,  $t_R$  (minor): 31.1 min, 97:3 er;  $\nu_{\max}$  (film), 3304 (N-H), 1721 (C=O), 1705 (C=O), 1649 (C=O); **<sup>1</sup>H NMR (CDCl<sub>3</sub>, 400 MHz)**  $\delta_H$ : 0.73 (3H, t, *J* 7.1, COOCH<sub>2</sub>CH<sub>3</sub>), 2.37 (1H, dd, *J* 14.8, 2.5, CH<sub>2</sub>CO), 2.81 (1H, dd, *J* 14.8, 11.3, CH<sub>2</sub>CONHBn), 3.67–3.84 (2H, m, COOCH<sub>2</sub>CH<sub>3</sub>), 4.38 (1H, dd, *J* 14.7, 5.6, NHCH<sub>2</sub>Ph), 4.45 (1H, dd, *J* 14.6, 5.6, NHCH<sub>2</sub>Ph), 4.55 (1H, dd, CHCOOEt), 4.71 (1H, d, *J* 15.6, CH<sub>2</sub>Ph), 5.06 (1H, d, *J* 15.6, CH<sub>2</sub>Ph), 5.76 (1H, t, *J* 5.4, NHCH<sub>2</sub>Ph), 6.81 (1H, d, *J* 15.6, CH-Ar), 7.07–7.11 (1H, m, CH-Ar), 7.21–7.36 (15H, m, CH-Ar), 7.45–7.47 (2H, m, CH-Ar); **<sup>13</sup>C NMR (CDCl<sub>3</sub>, 100 MHz)**  $\delta_C$ : 13.5 (COOCH<sub>2</sub>CH<sub>3</sub>), 34.5 (CH<sub>2</sub>CO), 43.8 (CH<sub>2</sub>Ph), 44.2 (CH<sub>2</sub>Ph), 47.8 (CHCOOCH<sub>2</sub>CH<sub>3</sub>), 57.3 (C(3)), 61.0 (CHCOOCH<sub>2</sub>CH<sub>3</sub>), 109.5 (CH-Ar), 122.2 (CH-Ar), 125.8 (CH-Ar), 127.5 (4×CH-Ar), 127.6 (2×CH-Ar), 127.7 (2×CH-Ar), 127.8 (2×CH-Ar), 127.9 (CH-Ar), 128.7 (4×CH-Ar), 128.9 (2×CH-Ar), 135.8 (C-Ar), 137.7 (C-Ar), 138.2 (C-Ar), 143.6 (C-Ar), 170.7 (CON), 171.4 (CONHBn), 177.4

(COOCH<sub>2</sub>CH<sub>3</sub>); c34HRMS (NSI<sup>+</sup>) exact mass calcd. For C<sub>34</sub>H<sub>33</sub>N<sub>2</sub>O<sub>4</sub><sup>+</sup> (M+H<sup>+</sup>) requires m/z 533.2435, found m/z 533.2422 (-2.4 ppm).

**81<sub>minor</sub>**: (30.0 mg, 28%) as a white solid. mp: 82-83°C; [ $\alpha$ ]<sub>D</sub><sup>20</sup> = +165.3 (*c* 0.8, CHCl<sub>3</sub>); Chiral HPLC analysis, Chiralcel OD-H (85:15 hexane : IPA, flow rate 1 mL/min<sup>-1</sup>, 254 nm, 30 °C) t<sub>R</sub> (major): 14.7 min, t<sub>R</sub> (minor): 11.8 min, 94:6 er; v<sub>max</sub> (film), 3307 (N-H), 1719 (C=O), 1706 (C=O), 1650 (C=O); **<sup>1</sup>H NMR (CDCl<sub>3</sub>, 400 MHz)** δ<sub>H</sub>: 0.78 (3H, t, *J* 7.2, COOCH<sub>2</sub>CH<sub>3</sub>), 2.33 (1H, dd, *J* 15.3, 3.5, CH<sub>2</sub>CONHBn), 2.80 (1H, dd, *J* 15.3, 10.8, CH<sub>2</sub>CO), 3.75–3.87 (2H, m, COOCH<sub>2</sub>CH<sub>3</sub>), 4.24–4.30 (2H, m, CHCOOEt, CONHCH<sub>2</sub>Ph), 4.36 (1H, dd, *J* 14.7, 5.8, CONHCH<sub>2</sub>Ph), 4.93 (1H, d, *J* 15.6, CH<sub>2</sub>Ph), 5.00 (1H, d, *J* 15.6, CH<sub>2</sub>Ph), 5.71 (1H, d, *J* 5.5, CONHCH<sub>2</sub>Ph), 6.75 (1H, d, *J* 7.5, CH-Ar), 7.06–7.10 (1H, m, CH-Ar), 7.17–7.38 (15H, m, CH-Ar), 7.54–7.58 (3H, m, CH-Ar); **<sup>13</sup>C NMR (CDCl<sub>3</sub>, 100 MHz)** δ<sub>C</sub>: 13.5 (COOCH<sub>2</sub>CH<sub>3</sub>), 34.7 (CH<sub>2</sub>CONHBn), 43.6 (CH<sub>2</sub>Ph), 44.1 (CH<sub>2</sub>Ph), 48.5 (CHCOOCH<sub>2</sub>CH<sub>3</sub>), 57.0 (C(3)), 60.7 (CHCOOCH<sub>2</sub>CH<sub>3</sub>), 109.4 (CH-Ar), 122.6 (CH-Ar), 126.3 (CH-Ar), 127.3 (2×CH-Ar), 127.5 (4×CH-Ar), 127.7 (2×CH-Ar), 127.8 (2×CH-Ar), 128.5 (CH-Ar), 128.6 (2×CH-Ar), 128.7 (2×CH-Ar), 128.8 (CH-Ar), 129.8 (C-Ar), 135.8 (C-Ar), 137.5 (C-Ar), 138.0 (C-Ar), 142.3 (C-Ar), 170.3 (CON), 172.4 (CONHBn), 176.7 (COOCH<sub>2</sub>CH<sub>3</sub>); **HRMS (NSI<sup>+</sup>)** exact mass calcd. For C<sub>34</sub>H<sub>33</sub>N<sub>2</sub>O<sub>4</sub><sup>+</sup> (M+H<sup>+</sup>) requires m/z 533.2435, found m/z 533.2425 (-1.8 ppm).



## 5 Determination of Product Configuration

### 5.1 X-ray crystal structures of 29, 29' and 29'.

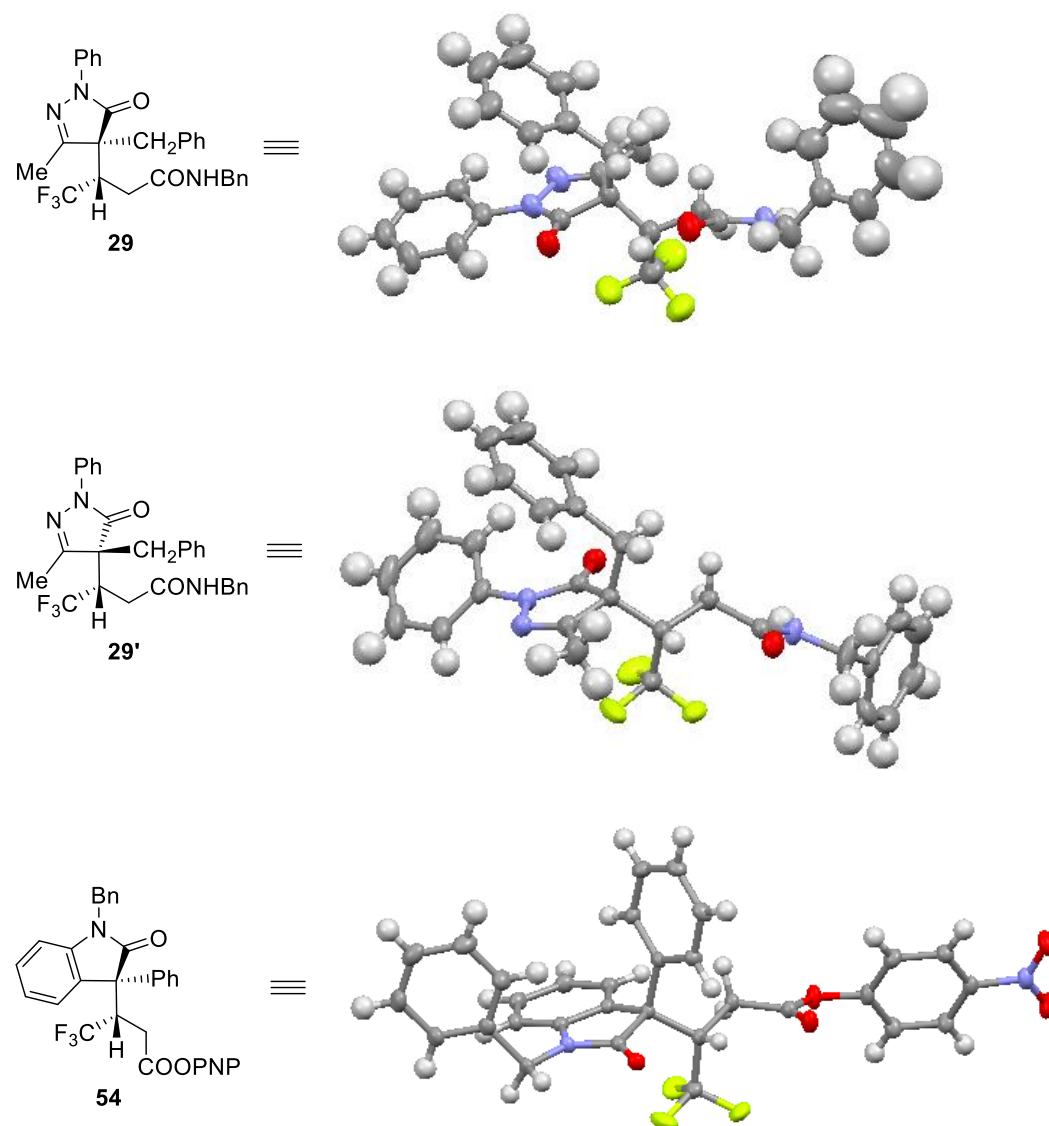

**Figure S1:** X-Ray crystal structures confirming the relative and absolute stereochemistry of **29**, **29'** and **54**.

#### 5.1 Crystal data of **29**, **29'** and **54**.

Crystal data for **29**:  $C_{28}H_{26}F_3N_3O_2$ ,  $M = 493.52$ , colourless prism, orthorhombic space group  $P1\ 21\ 1$ ;  $a = 13.5575(2)\ \text{\AA}$ ,  $b = 23.9425(3)\ \text{\AA}$ ,  $c = 19.8418(3)\ \text{\AA}$ ,  $\alpha = 90^\circ$ ,  $\beta = 93.584^\circ$ ,  $\gamma = 90^\circ$ ,  $V = 6428.06(16)\ \text{\AA}^3$ ,  $Z = 10$ ,  $D_x = 1.275\ \text{g cm}^{-3}$ ,  $R = 0.0406$ . Data were recorded at 173 K on Rigaku XtaLAB P100 diffractometer using multi-layer mirror monochromated  $\text{Cu-K}\alpha$  radiation and the structures were solved by direct methods and refined using full-matrix least square analysis.

Crystal data for **29'**:  $C_{28}H_{26}F_3N_3O_2$ ,  $M = 493.53$ , colourless prism, orthorhombic space group  $P1\ 21/c\ 1$ ;  $a = 19.753(4)\ \text{\AA}$ ,  $b = 13.427(3)\ \text{\AA}$ ,  $c = 9.3303(18)\ \text{\AA}$ ,  $\alpha = 90^\circ$ ,  $\beta = 93.119(8)^\circ$ ,  $\gamma = 90^\circ$ ,  $V = 2470.9(9)\ \text{\AA}^3$ ,  $Z = 4$ ,  $D_x = 1.327\ \text{g cm}^{-3}$ ,  $R = 0.0480$ . Data were recorded at 173 K on Rigaku XtaLAB P100

diffractometer using multi-layer mirror monochromated Cu-K $\sigma$  radiation and the structures were solved by direct methods and refined using full-matrix least square analysis.

Crystal data for **54**: C<sub>31</sub>H<sub>23</sub>F<sub>3</sub>N<sub>2</sub>O<sub>5</sub>, M = 560.53, colourless prism, orthorhombic space group *P1 21 1*; *a* = 8.97942(5) Å, *b* = 10.93580(6) Å, *c* = 27.05100(16) Å,  $\alpha = 90^\circ$ ,  $\beta = 90^\circ$ ,  $\gamma = 90^\circ$ , *V* = 2656.33(3) Å<sup>3</sup>, *Z* = 4, *D*<sub>x</sub> = 1.401 g cm<sup>-3</sup>, *R* = 0.0268. Data were recorded at 173 K on Rigaku XtaLAB P100 diffractometer using multi-layer mirror monochromated Cu-K $\sigma$  radiation and the structures were solved by direct methods and refined using full-matrix least square analysis.

## 6 References

1. Badiola, Eider; Fiser, Béla; Gómez-Bengoia, Enrique; Mielgo, Antonia; Olaizola, Iurre; Urruzuno, Iñaki; García, Jesús M.; Odriozola, José M.; Razkin, Jesús; Oiarbide, Mikel; Palomo, Claudio. *J. Am. Chem. Soc.*, **2014**, *136*, 17869–17881.
2. Wang, Tianli; Yu, Zhaoyuan; Hoon, Ding Long; Huang, Kuo-Wei; Lan, Yu; Lu, Yixin. *Chem. Sci.*, **2015**, *6*, 4912–4922.
3. Ruble, J. Craig; Fu, Gregory C. *J. Am. Chem. Soc.*, **1998**, *120*, 11532–11533.
4. Huang, Audris; Kodanko, Jeremy J.; Overman, Larry E. *J. Am. Chem. Soc.*, **2004**, *126*, 14043–14053.
5. Sheng, Xuguang; Zhang, Jinlong; Yang, Huameng; Jiang, Gaoxi. *Org. Lett.*, **2017**, *19*, 2618–2621.

## Appendix I: Reaction of Unsuccessful Pronucleophiles

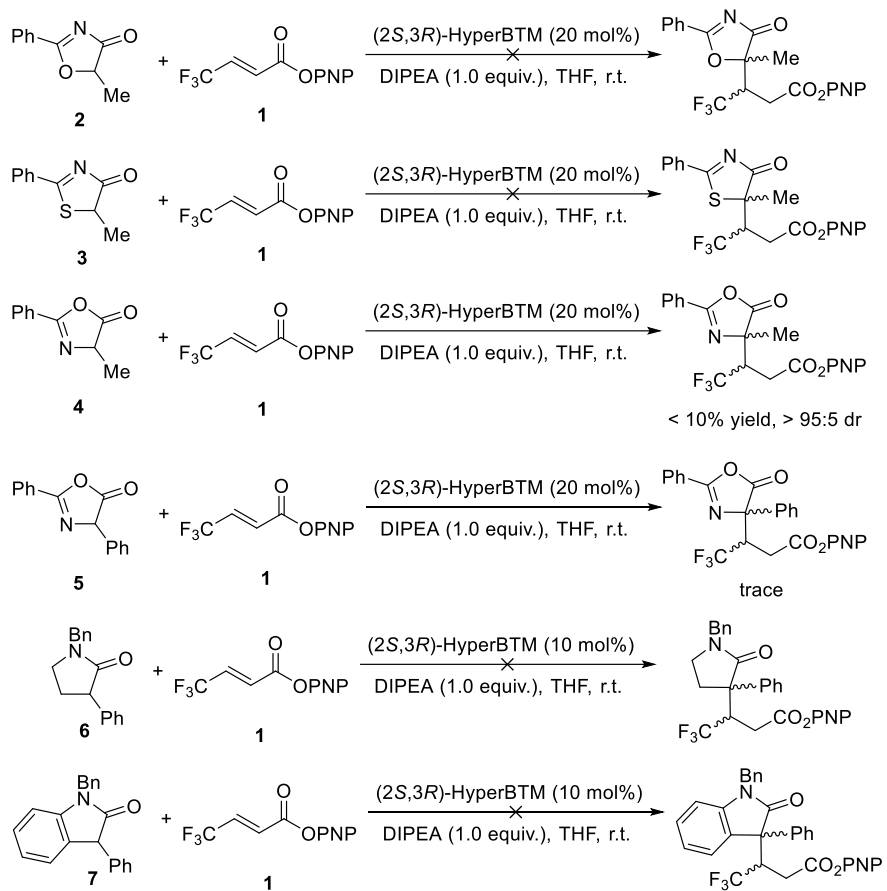

## Appendix II: Supplementary Optimisation Studies

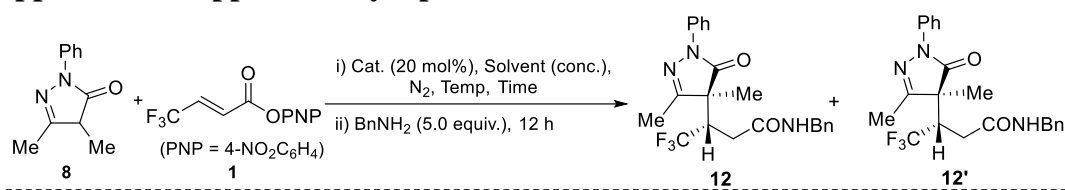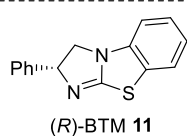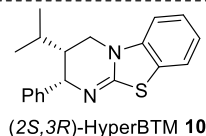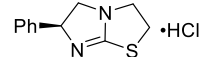

| Entry             | Cat.      | Solvent            | Temp [°C] | Time [h] | Yield [%] <sup>[a]</sup> | dr <sup>[b]</sup> | <b>12</b> ,<br><i>ee</i> [%] <sup>[c]</sup> | <b>12'</b> ,<br><i>ee</i> [%] <sup>[c]</sup> |
|-------------------|-----------|--------------------|-----------|----------|--------------------------|-------------------|---------------------------------------------|----------------------------------------------|
| 1                 | <b>11</b> | THF                | r.t.      | 6        | 84                       | 67:33             | 91                                          | 91                                           |
| 2                 | <b>10</b> | THF                | r.t.      | 6        | 72                       | 68:32             | 93                                          | 91                                           |
| 3 <sup>[d]</sup>  | <b>S5</b> | THF                | r.t.      | 6        | 64                       | 72:28             | -82                                         | -56                                          |
| 4                 | <b>10</b> | CH <sub>3</sub> CN | r.t.      | 6        | 64                       | 63:37             | 88                                          | 87                                           |
| 5                 | <b>10</b> | DMF                | r.t.      | 6        | 74                       | 66:34             | 78                                          | 86                                           |
| 6                 | <b>10</b> | DCM                | r.t.      | 24       | 42                       | 58:42             | 92                                          | 90                                           |
| 7                 | <b>10</b> | toluene            | r.t.      | 24       | 36                       | 67:33             | 92                                          | 89                                           |
| 8                 | <b>10</b> | Et <sub>2</sub> O  | r.t.      | 6        | 45                       | 53:47             | 90                                          | 93                                           |
| 9 <sup>[e]</sup>  | <b>10</b> | THF                | r.t.      | 6        | 53                       | 68:32             | 89                                          | 89                                           |
| 10 <sup>[f]</sup> | <b>10</b> | THF                | r.t.      | 6        | 48                       | 74:26             | 88                                          | 89                                           |
| 11 <sup>[g]</sup> | <b>10</b> | THF                | r.t.      | 6        | 61                       | 67:33             | 86                                          | 88                                           |
| 12 <sup>[h]</sup> | <b>10</b> | THF                | r.t.      | 6        | 63                       | 67:33             | 89                                          | 88                                           |
| 13                | <b>10</b> | THF                | 0 °C      | 24       | 87                       | 72:28             | 92                                          | 92                                           |
| 14                | <b>11</b> | THF                | 0 °C      | 24       | 77                       | 70:30             | 92                                          | 91                                           |
| 15                | <b>10</b> | THF                | -10 °C    | 24       | 82                       | 75:25             | 91                                          | 93                                           |
| 16                | <b>10</b> | THF                | -40 °C    | 48       | 36                       | 50:50             | 94                                          | 94                                           |
| 17 <sup>[i]</sup> | <b>10</b> | THF                | r.t.      | 72       | 47                       | 68:32             | 91                                          | 90                                           |

[a] Isolated overall yields given.

[b] dr of crude product determined by <sup>1</sup>H NMR spectroscopic analysis.

[c] *ee* determined by chiral HPLC analysis.

[d] 0.2 mmol of <sup>i</sup>Pr<sub>2</sub>NEt was added.

[e] 1 mL of solvent was used.

[f] 4 mL of solvent was used.

[g] 0.24 mmol of **5a** was used.

[h] 0.24 mmol of **2a** was used.

[i] 0.02 mmol of catalyst was used.

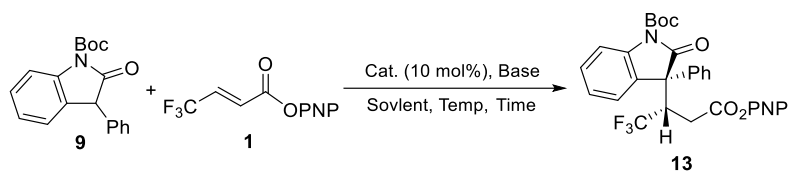

| Entry | Cat.      | Base               | Solvent                         | Temp [°C] | Time [h] | Yield [%] <sup>[a]</sup> | dr <sup>[b]</sup> | <b>13</b> ,<br><i>ee</i> [%] <sup>[c]</sup> |
|-------|-----------|--------------------|---------------------------------|-----------|----------|--------------------------|-------------------|---------------------------------------------|
| 1     | <b>11</b> | DIPEA (1.5 equiv.) | THF                             | 0         | 16       | 71                       | 87:13             | 93:7                                        |
| 2     | <b>11</b> | DABCO (1.5 equiv.) | THF                             | 0         | 16       | 60                       | 86:14             | 92:8                                        |
| 3     | <b>10</b> | DIPEA (1.5 equiv.) | THF                             | 0         | 16       | 76                       | 83:17             | 98:2                                        |
| 4     | <b>10</b> | DIPEA (1.5 equiv.) | CH <sub>2</sub> Cl <sub>2</sub> | 0         | 16       | 78                       | 83:17             | 95:5                                        |
| 5     | <b>10</b> | DIPEA (1.5 equiv.) | CHCl <sub>3</sub>               | 0         | 48       | 23                       | 71:29             | 91:9                                        |
| 6     | <b>10</b> | DIPEA (1.5 equiv.) | toluene                         | 0         | 48       | 58                       | 75:25             | 95:5                                        |
| 7     | <b>10</b> | DIPEA (1.5 equiv.) | CH <sub>3</sub> CN              | 0         | 16       | 88                       | 83:17             | 96.5:3.5                                    |
| 8     | <b>10</b> | DIPEA (1.5 equiv.) | DMF                             | 0         | 16       | 54                       | 78:22             | 90:10                                       |
| 9     | <b>10</b> | DIPEA (1.5 equiv.) | acetone                         | 0         | 16       | 60                       | 83:17             | 98:2                                        |
| 10    | <b>10</b> | DIPEA (1.0 equiv.) | THF                             | 0         | 16       | 79                       | 83:17             | 97.5:2.5                                    |
| 11    | <b>10</b> | DIPEA (0.5 equiv.) | THF                             | 0         | 16       | 78                       | 86:14             | 97.5:2.5                                    |
| 12    | <b>10</b> | DIPEA (1.0 equiv.) | THF                             | r.t.      | 16       | 79                       | 84:16             | 98:2                                        |

[a] Isolated overall yields given; [b] dr of crude product determined by <sup>1</sup>H NMR spectroscopic analysis; [c] *ee* determined by chiral HPLC analysis.

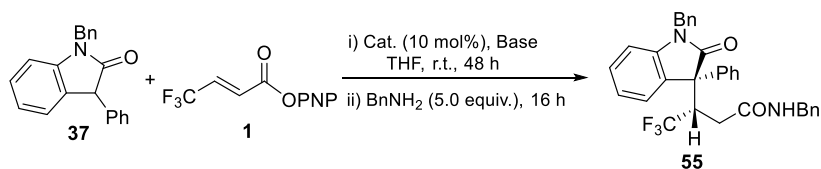

| Entry | Cat.      | Base                | Yield [%] <sup>[a]</sup> | dr <sup>[b]</sup> | <b>55</b> ,<br><i>ee</i> [%] <sup>[c]</sup> |
|-------|-----------|---------------------|--------------------------|-------------------|---------------------------------------------|
| 1     | <b>10</b> | DIPEA (0.2 equiv.)  | 69                       | >99:1             | 99.5:0.5                                    |
| 2     | <b>10</b> | DIPEA (0.5 equiv.)  | 62                       | >99:1             | 98.5:1.5                                    |
| 3     | <b>10</b> | DIPEA (0.75 equiv.) | 75                       | >99:1             | 98.5:1.5                                    |
| 4     | <b>10</b> | DIPEA (1.0 equiv.)  | 86                       | >99:1             | 99.5:0.5                                    |
| 5     | <b>10</b> | -                   | 59                       | >99:1             | 99:1                                        |
| 6     | -         | DIPEA (1.0 equiv.)  | NR                       | -                 | -                                           |

[a] Isolated overall yields given; [b] dr of crude product determined by <sup>1</sup>H NMR spectroscopic analysis; [c] *ee* determined by chiral HPLC analysis.

## Appendix III: NMR Spectra

### (*S*)-*N*-benzyl-3-((*S*)-1-benzyl-3,4-dimethyl-5-oxo-4,5-dihydro-1*H*-pyrazol-4-yl)-4,4,4-trifluorobutanamide (**12<sub>major</sub>**)

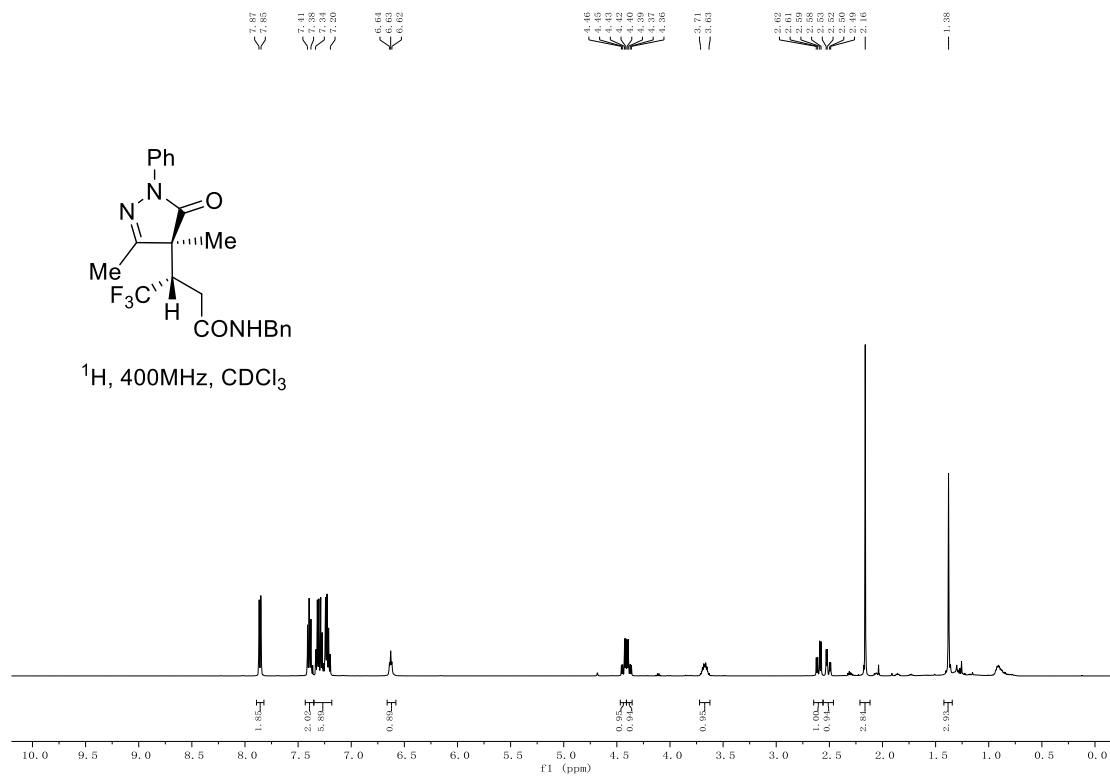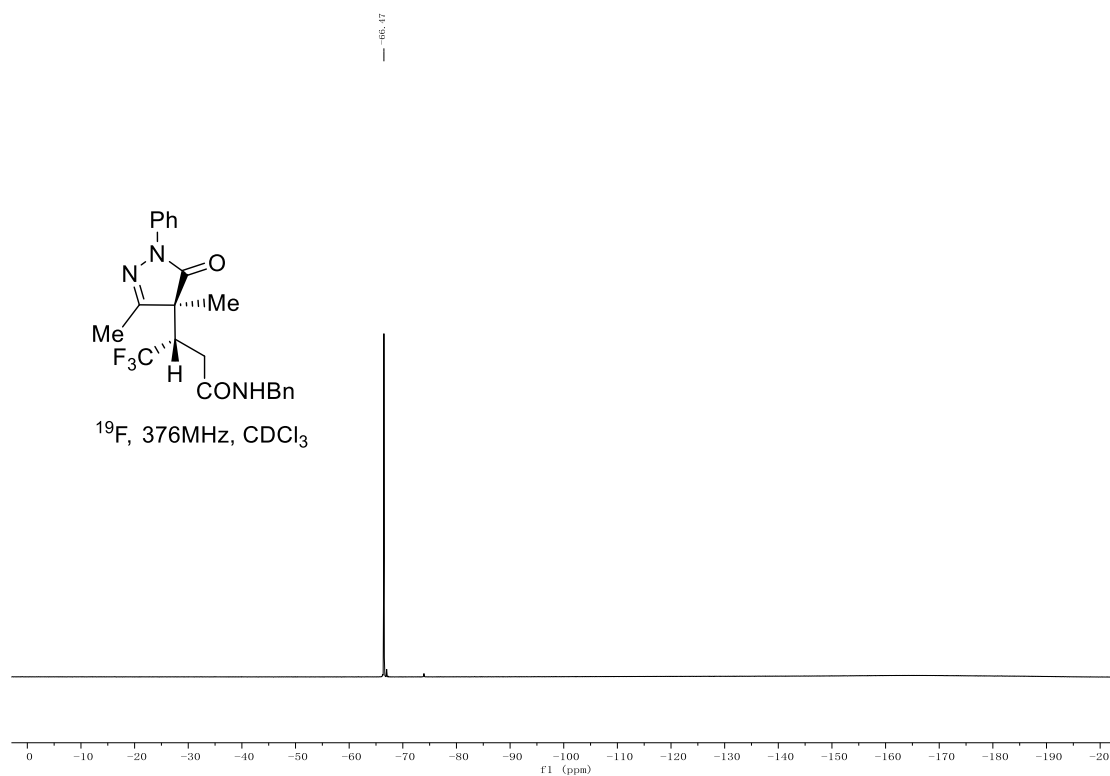

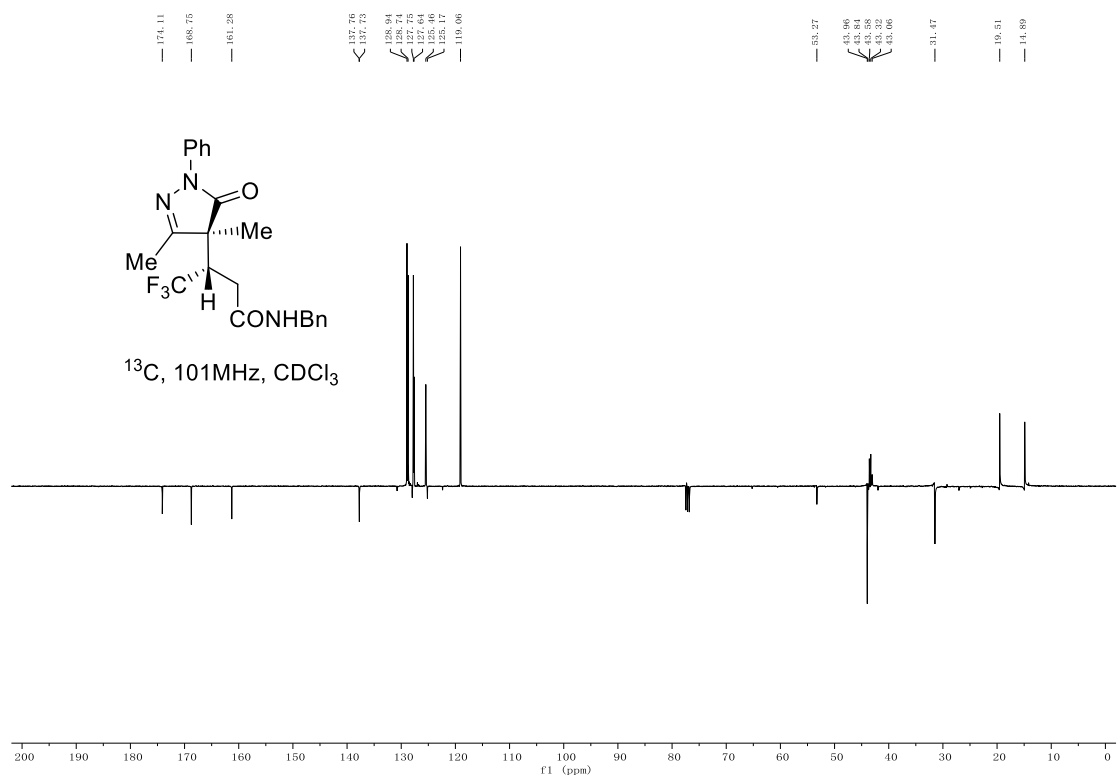

**(S)-N-benzyl-3-((R)-3,4-dimethyl-5-oxo-1-phenyl-4,5-dihydro-1H-pyrazol-4-yl)-4,4,4-trifluorobutanamide (12<sub>minor</sub>)**

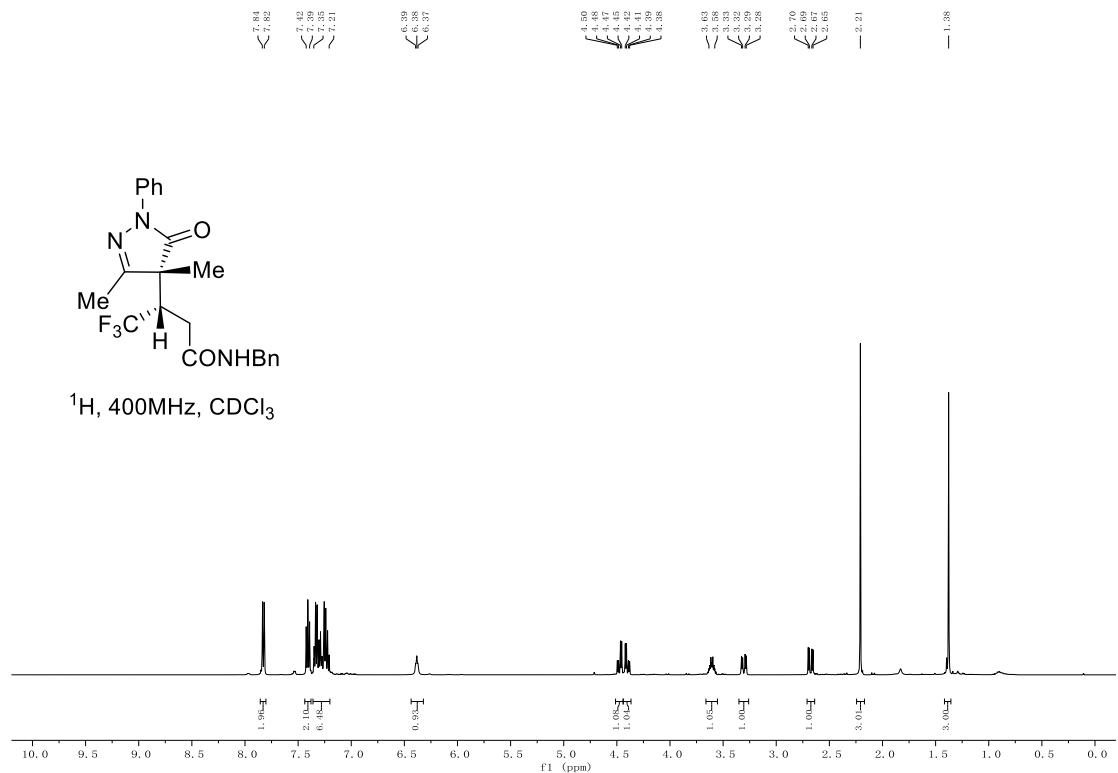



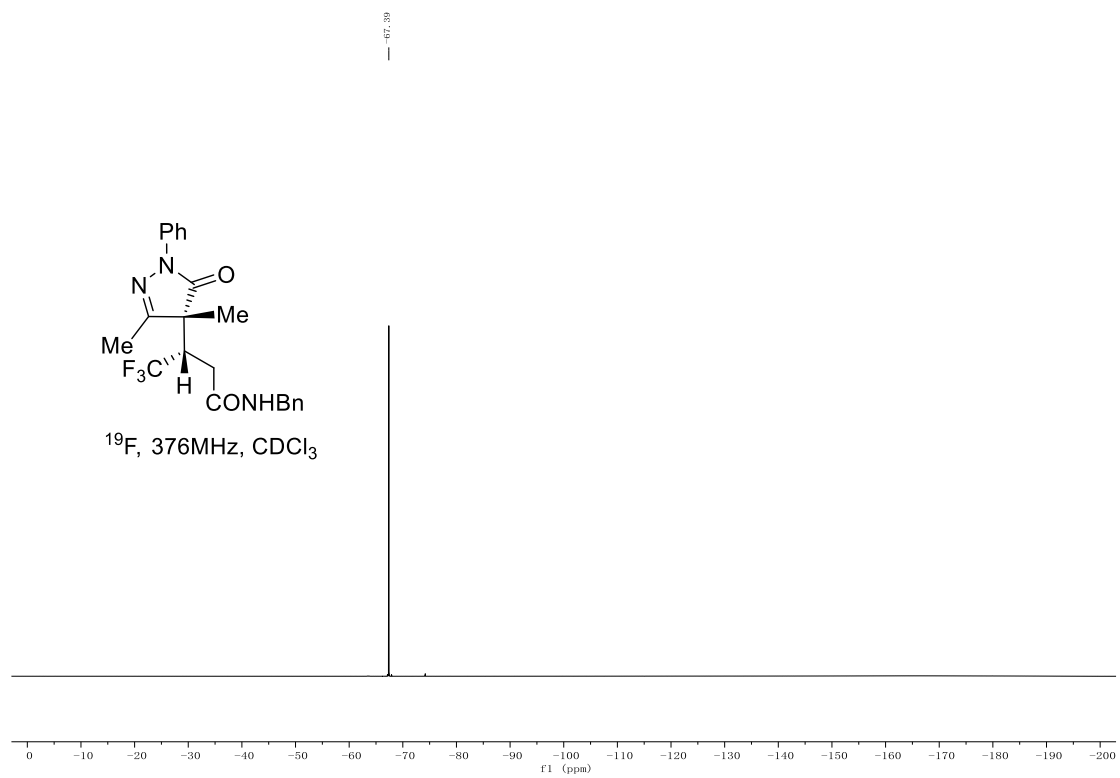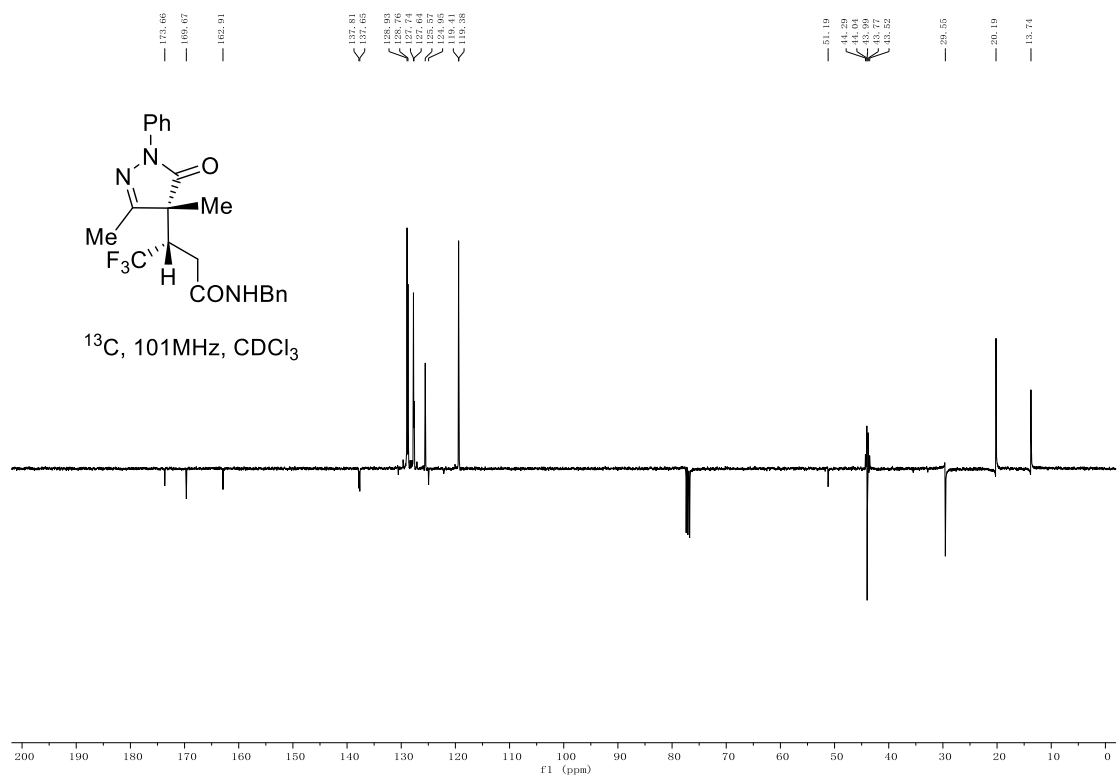

**(S)-N-benzyl-4,4,4-trifluoro-3-((S)-1,3,4-trimethyl-5-oxo-4,5-dihydro-1H-pyrazol-4-yl)butanamide (25<sub>major</sub>)**

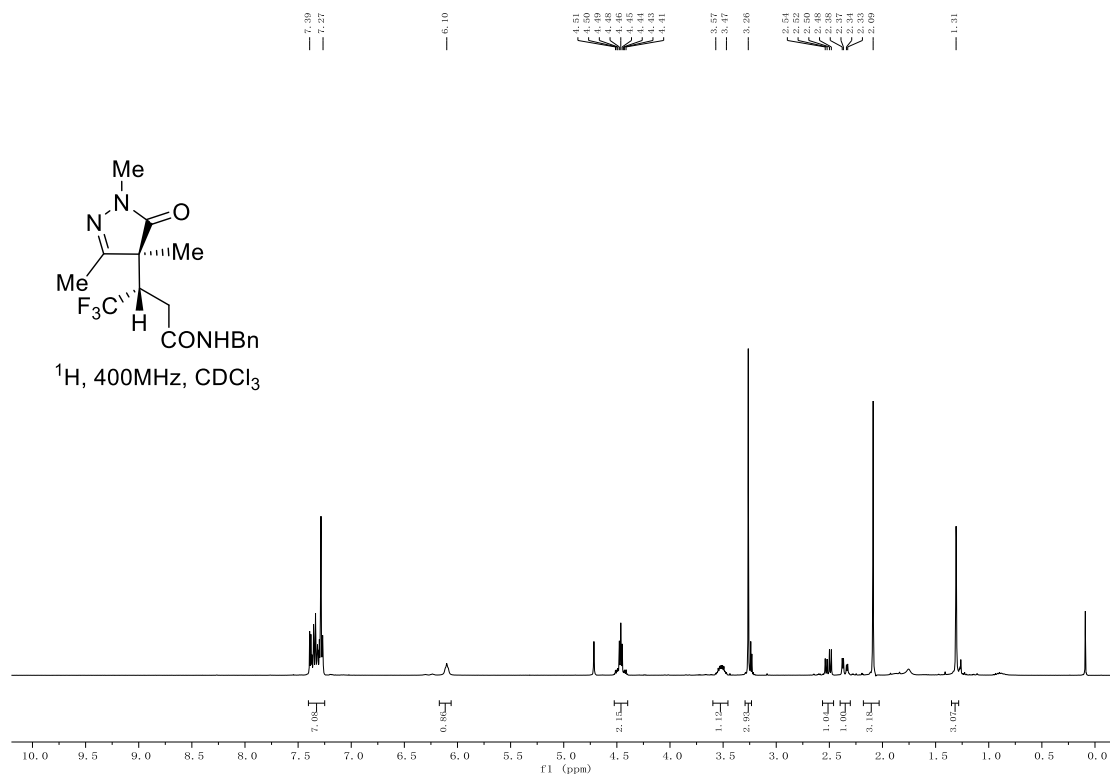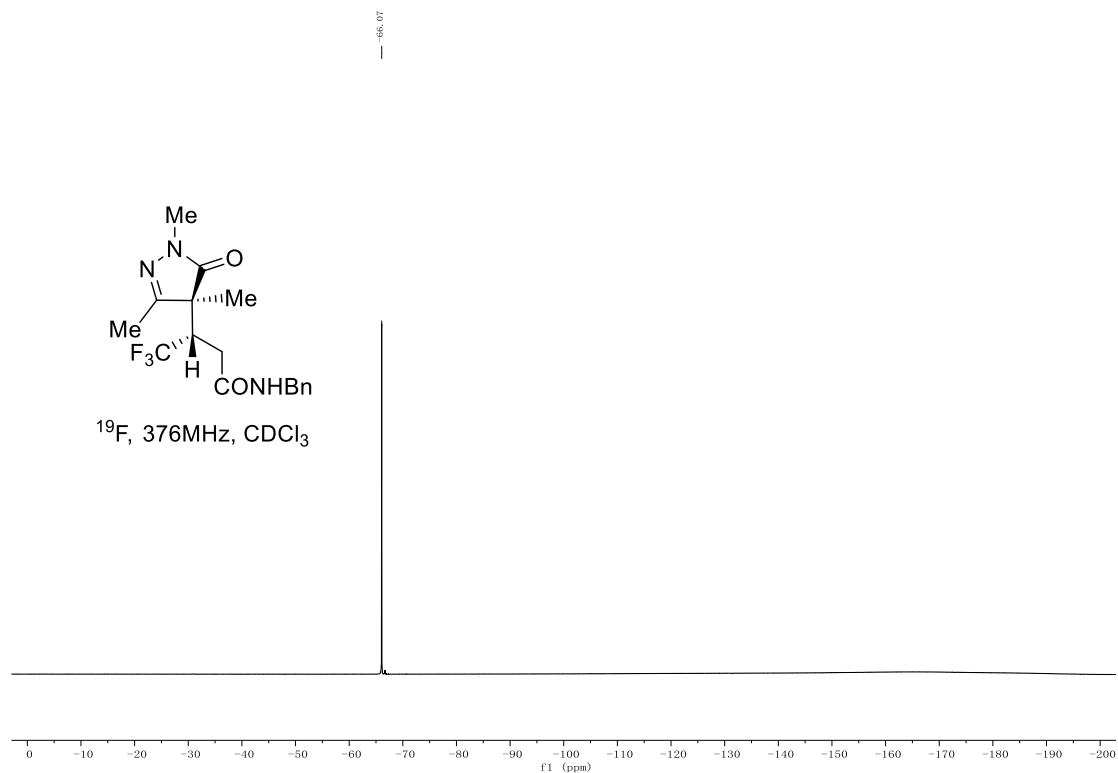

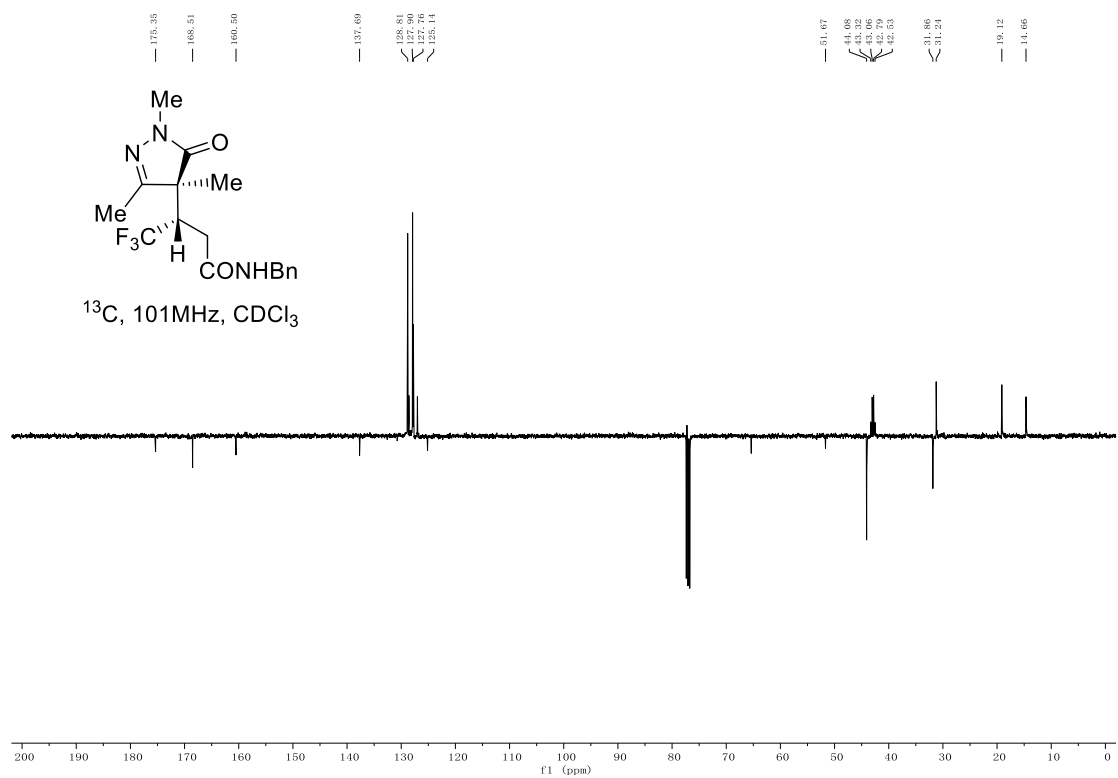

(*S*)-*N*-benzyl-4,4,4-trifluoro-3-((*R*)-1,3,4-trimethyl-5-oxo-4,5-dihydro-1*H*-pyrazol-4-yl)butanamide  
(**25**<sub>minor</sub>)

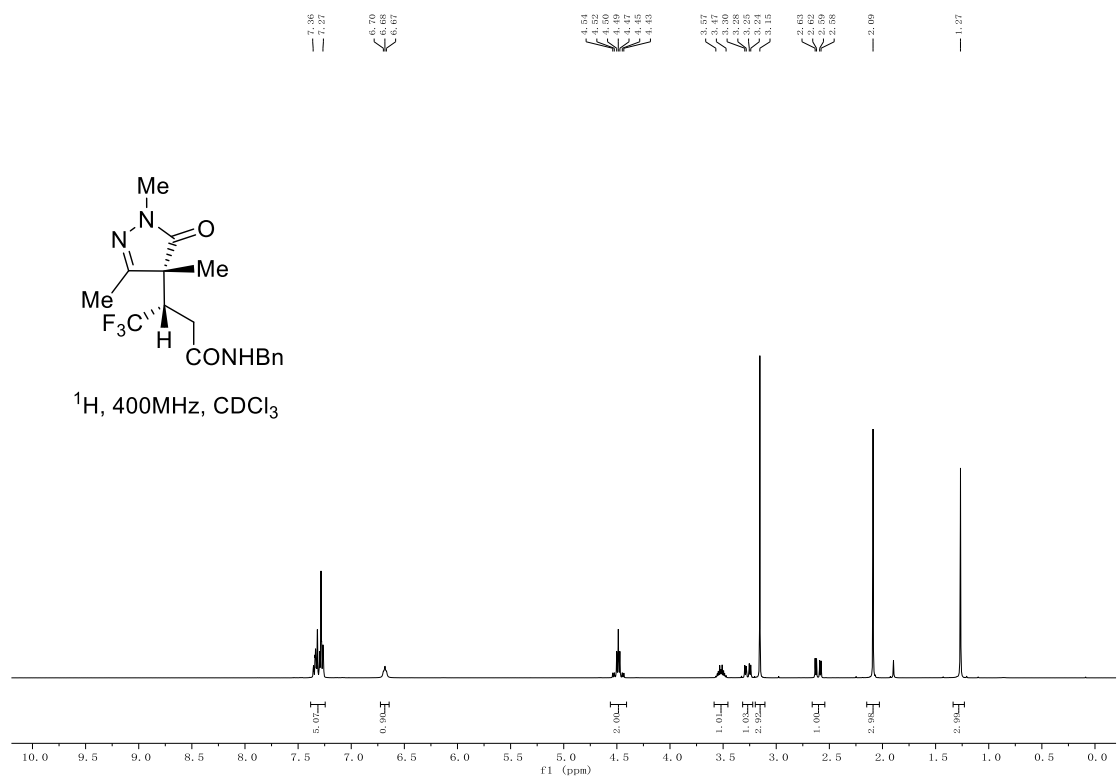

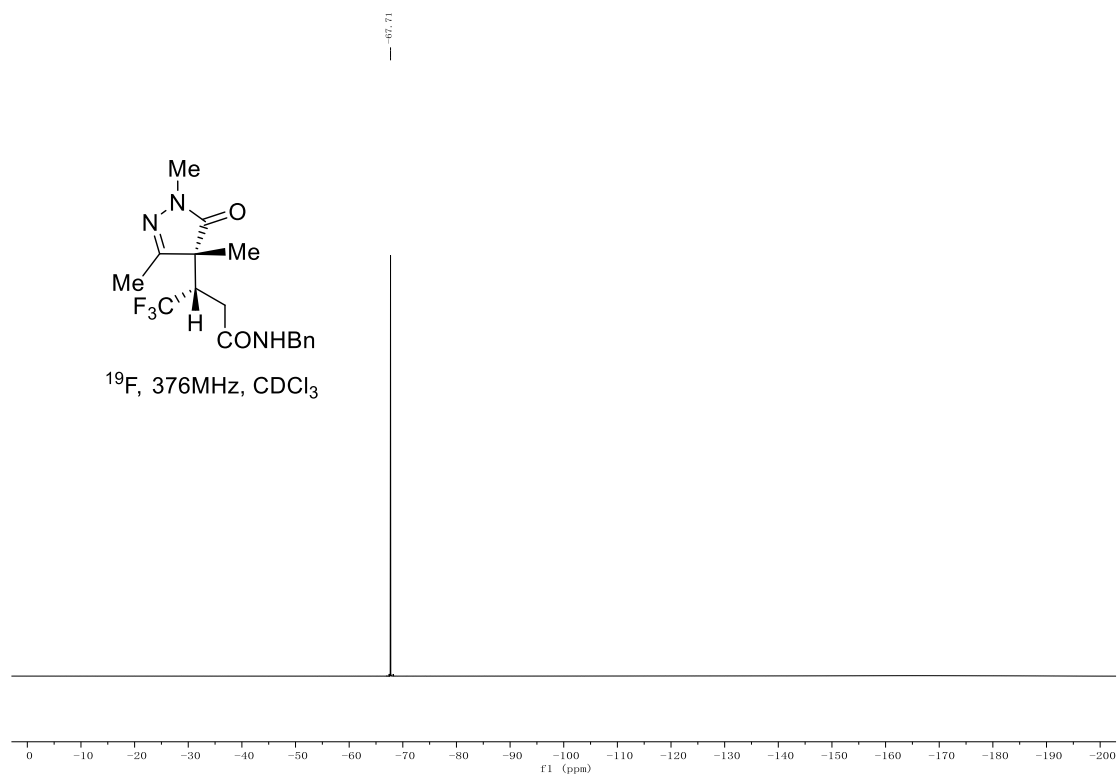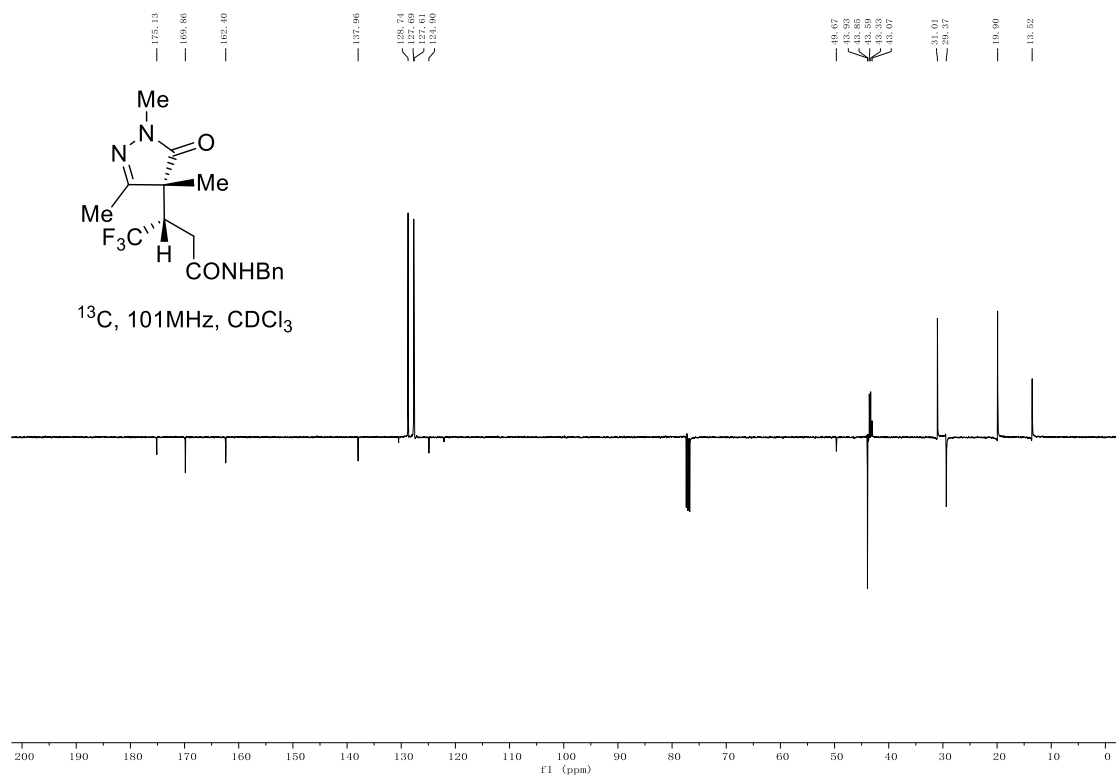

**(S)-N-benzyl-3-((S)-1-benzyl-3,4-dimethyl-5-oxo-4,5-dihydro-1H-pyrazol-4-yl)-4,4,4-trifluorobutanamide (26<sub>major</sub>)**

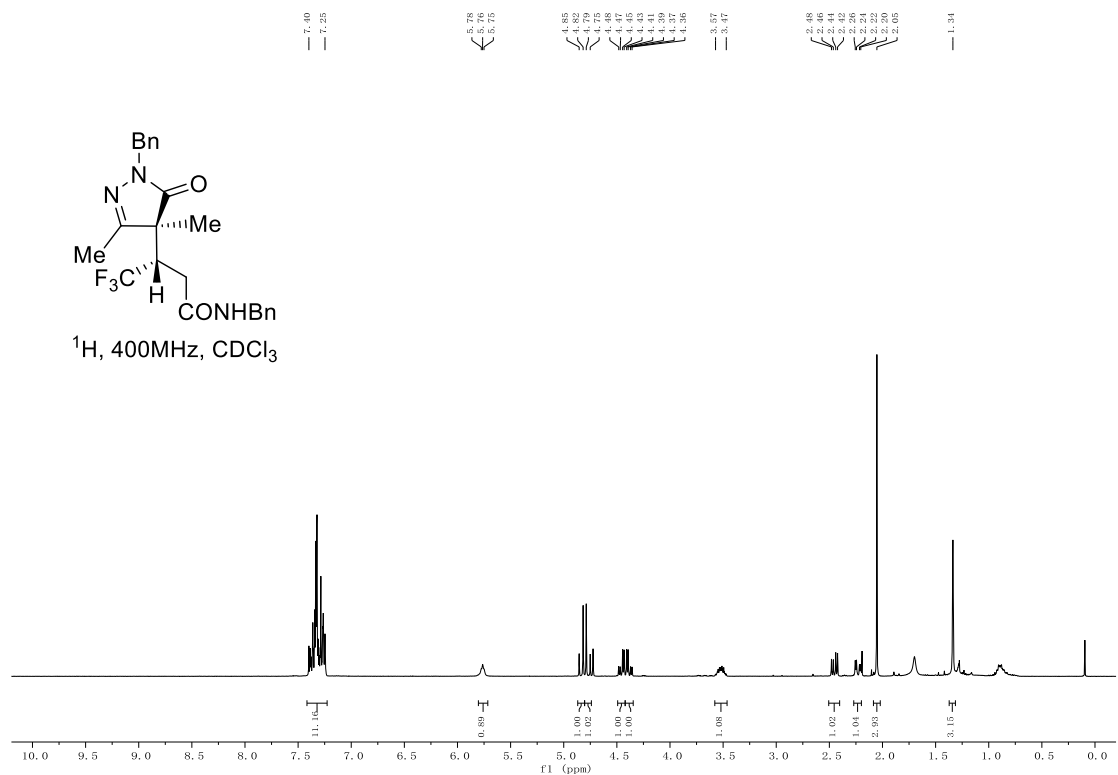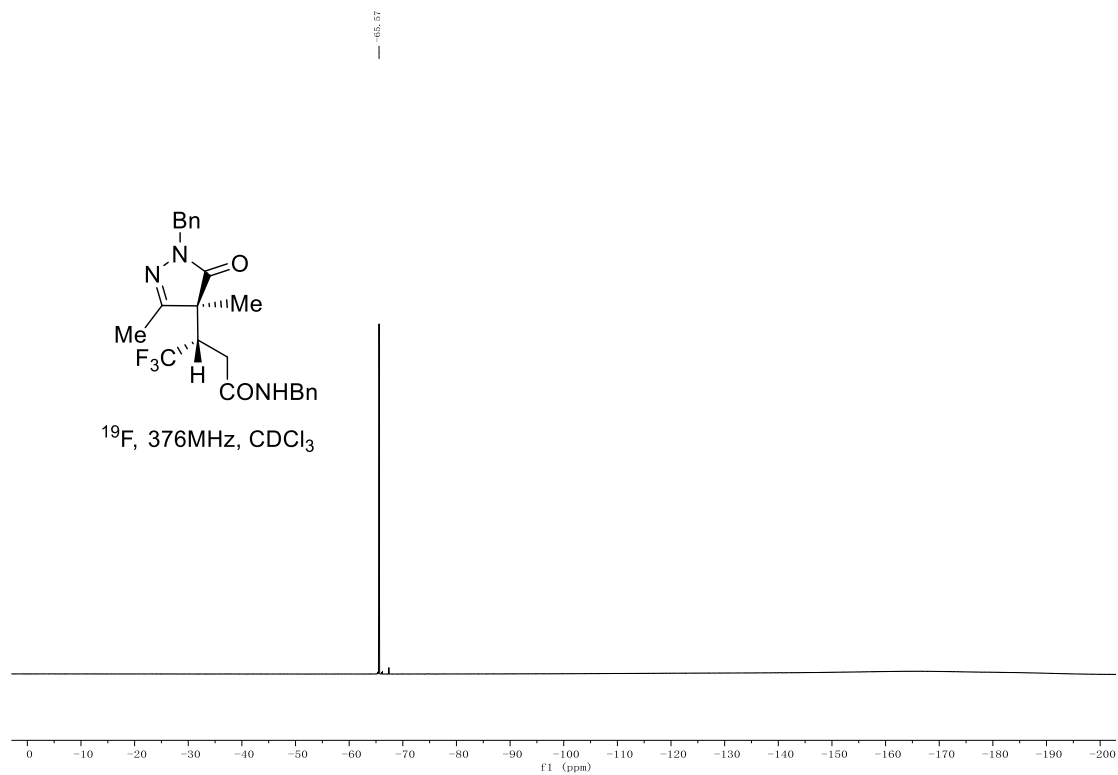

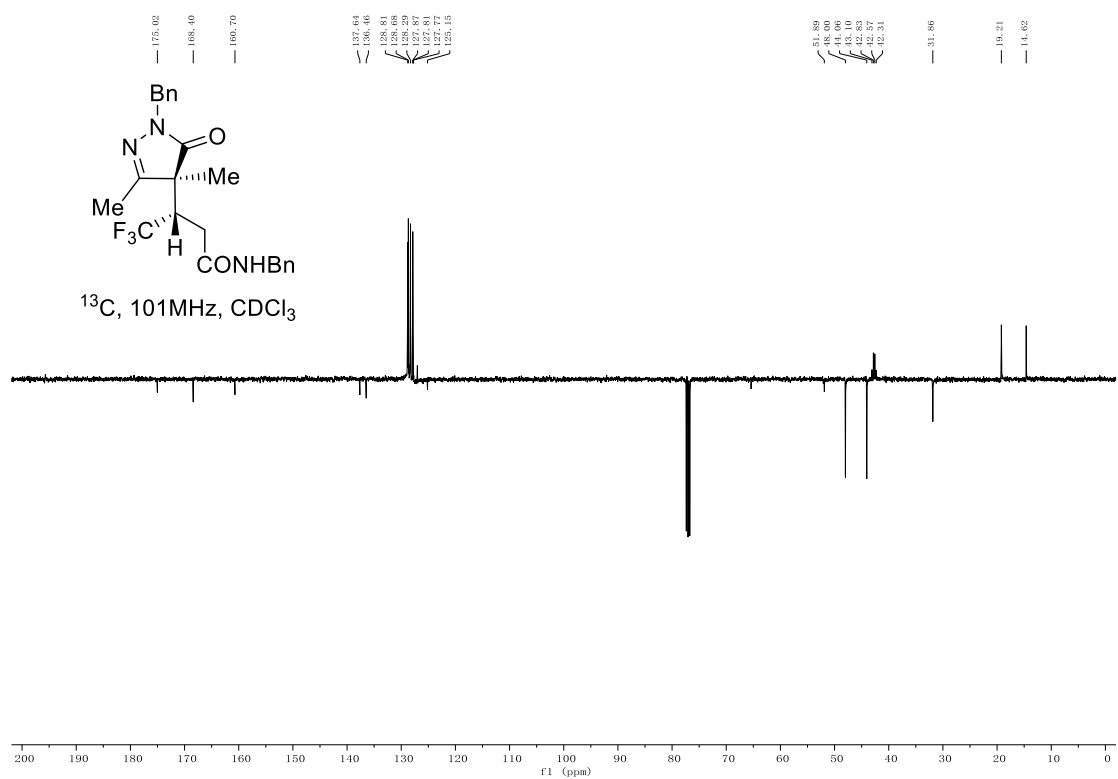

**(S)-N-benzyl-3-((R)-1-benzyl-3,4-dimethyl-5-oxo-4,5-dihydro-1H-pyrazol-4-yl)-4,4,4-trifluorobutanamide ( $26_{\text{minor}}$ )**

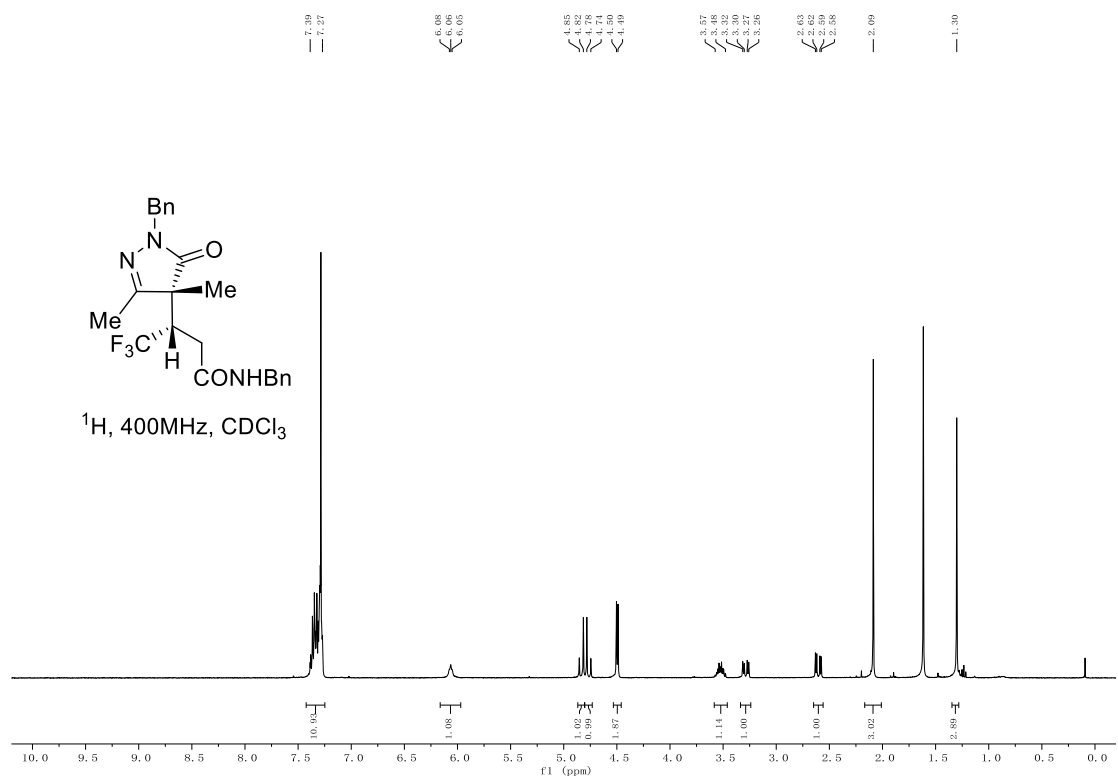

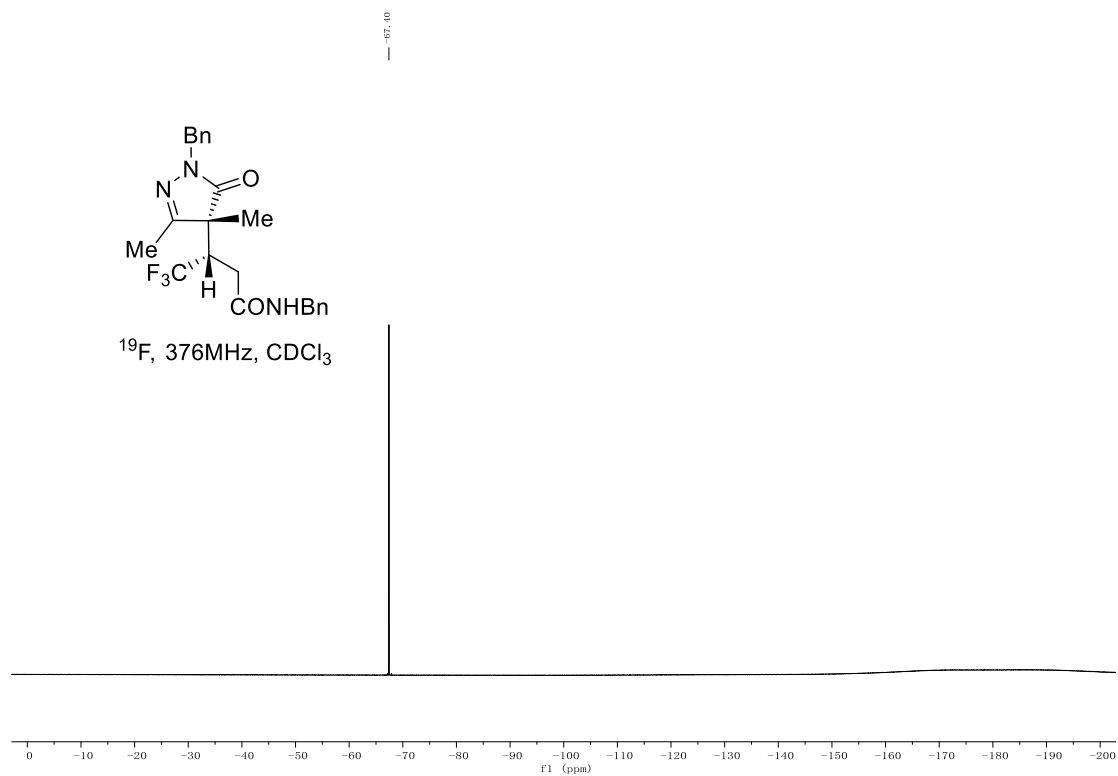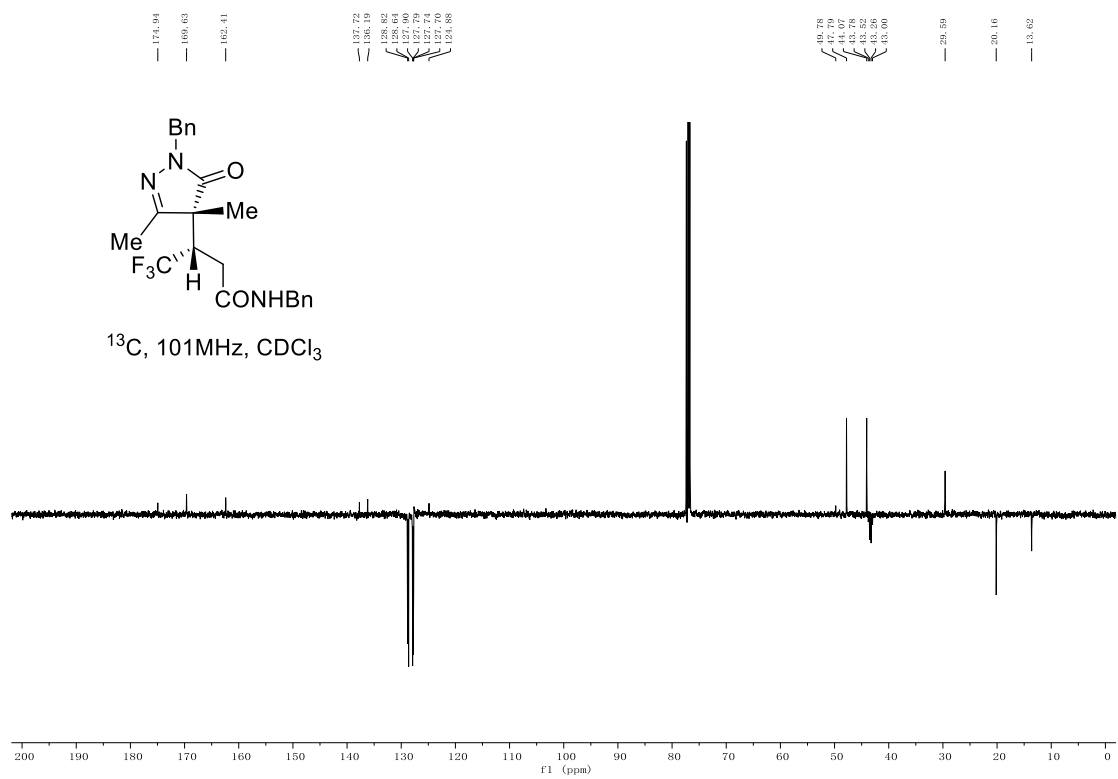

**(S)-N-benzyl-3-((S)-4-ethyl-3-methyl-5-oxo-1-phenyl-4,5-dihydro-1H-pyrazol-4-yl)-4,4,4-trifluorobutanamide (27<sub>major</sub>)**

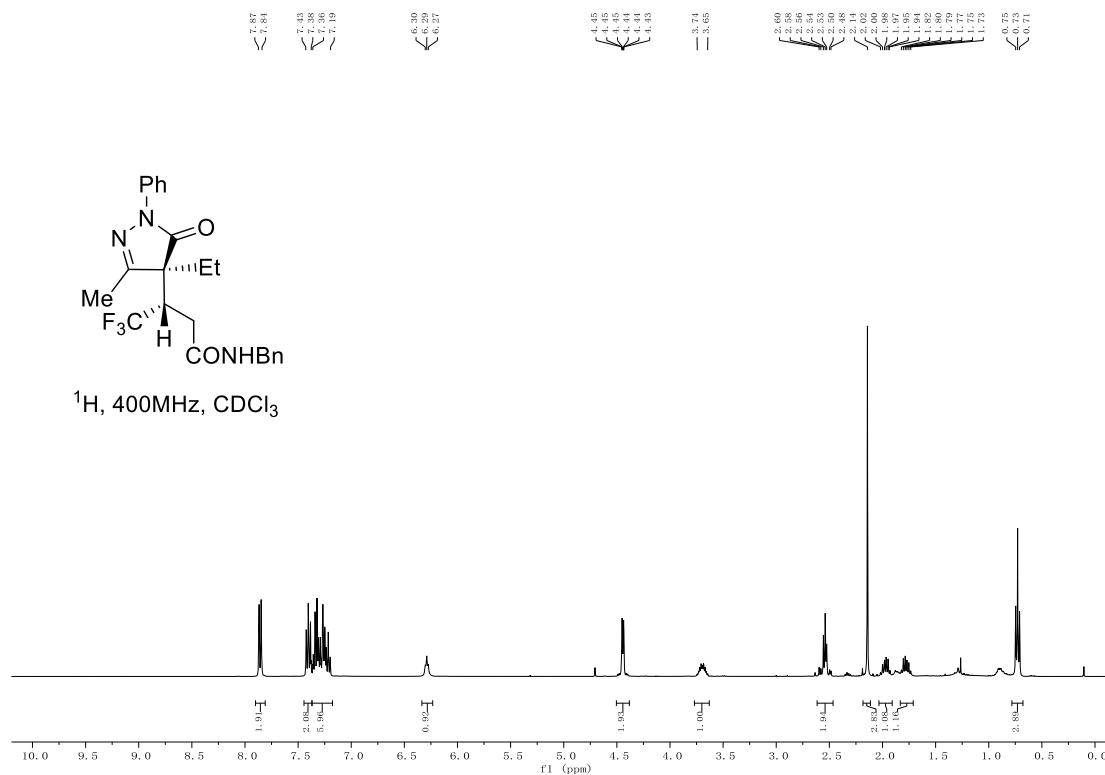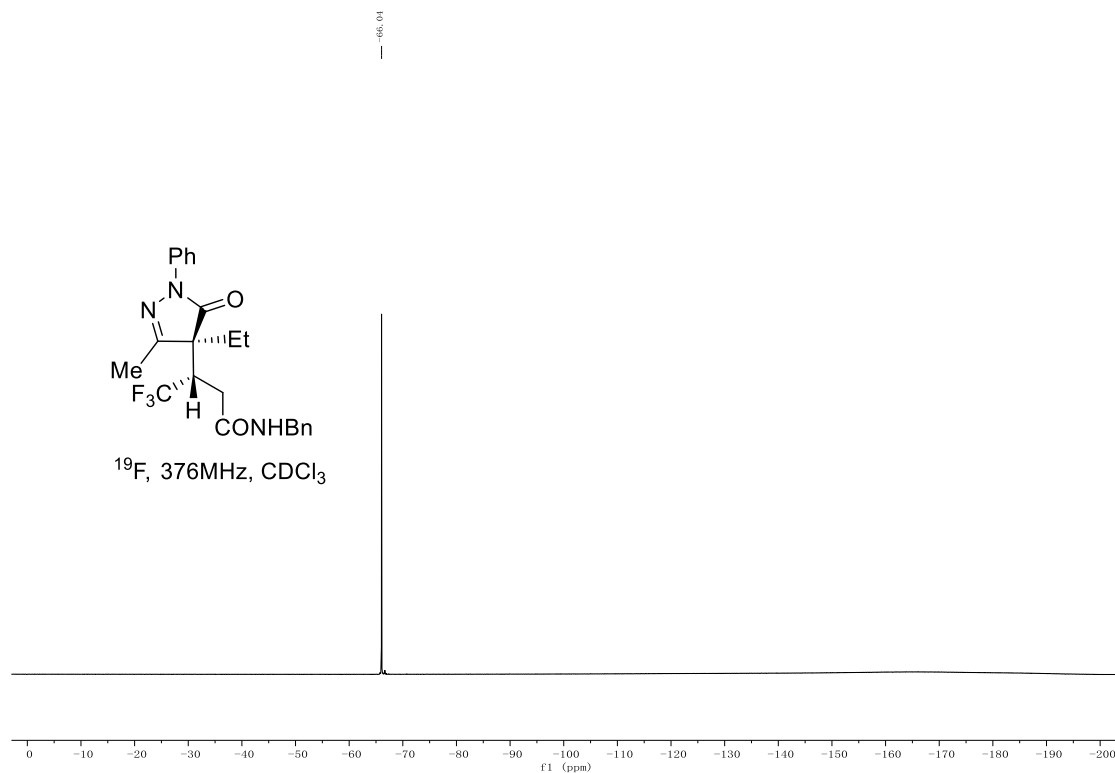



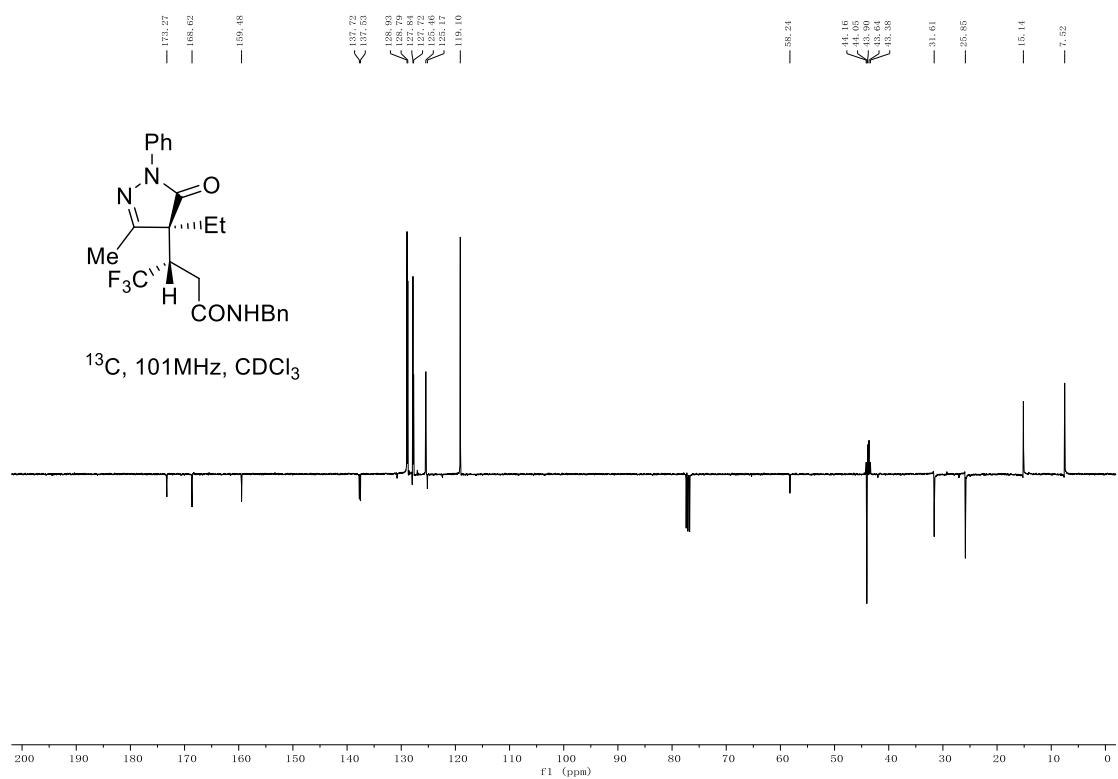

**(S)-N-benzyl-3-((R)-4-ethyl-3-methyl-5-oxo-1-phenyl-4,5-dihydro-1H-pyrazol-4-yl)-4,4,4-trifluorobutanamide ( $27_{\text{minor}}$ )**

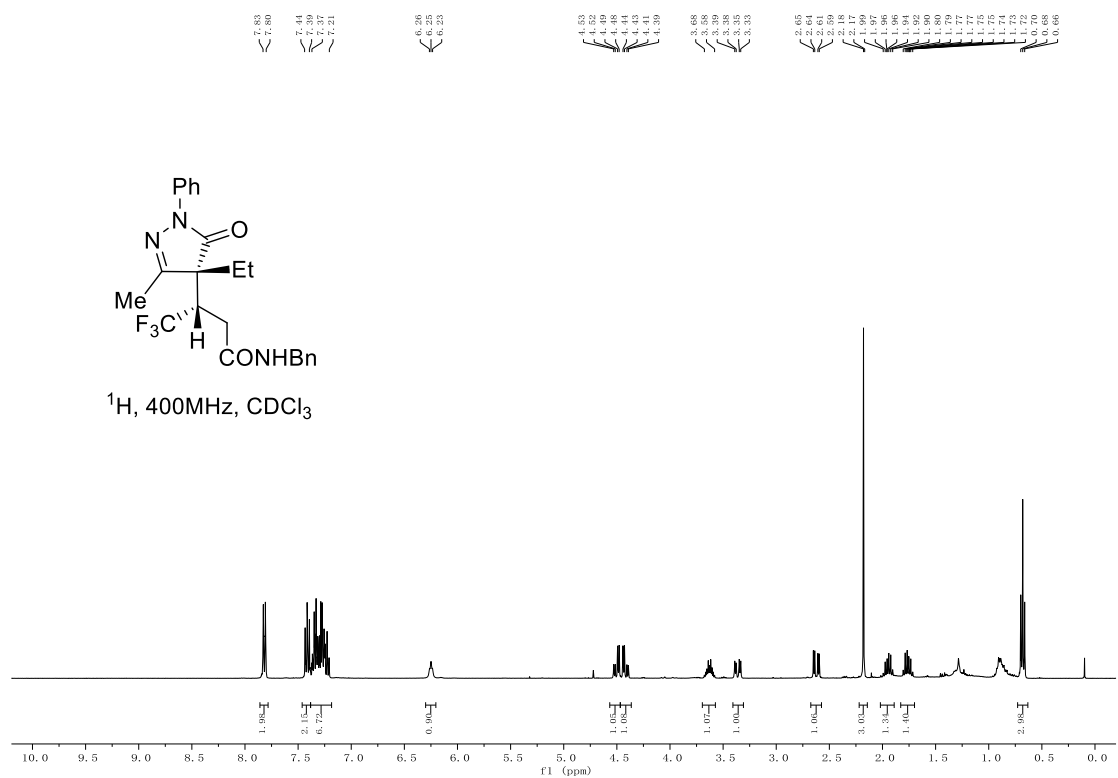

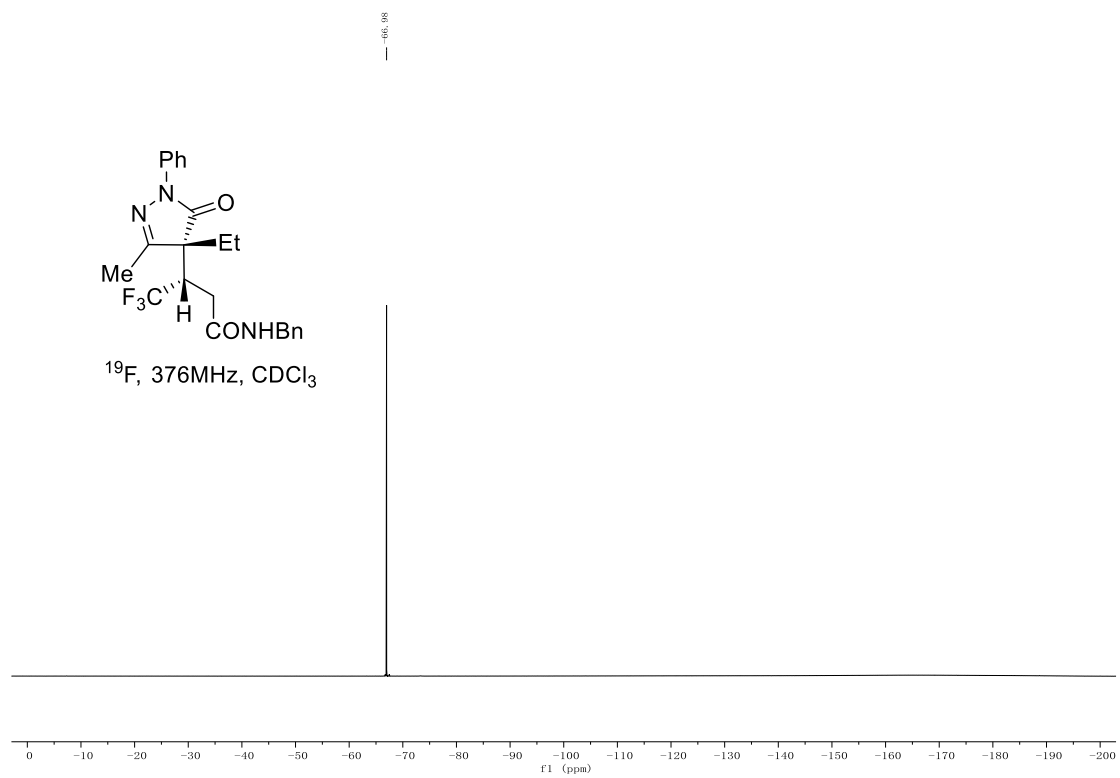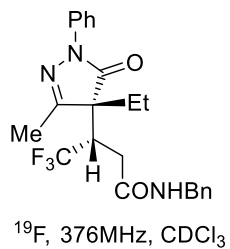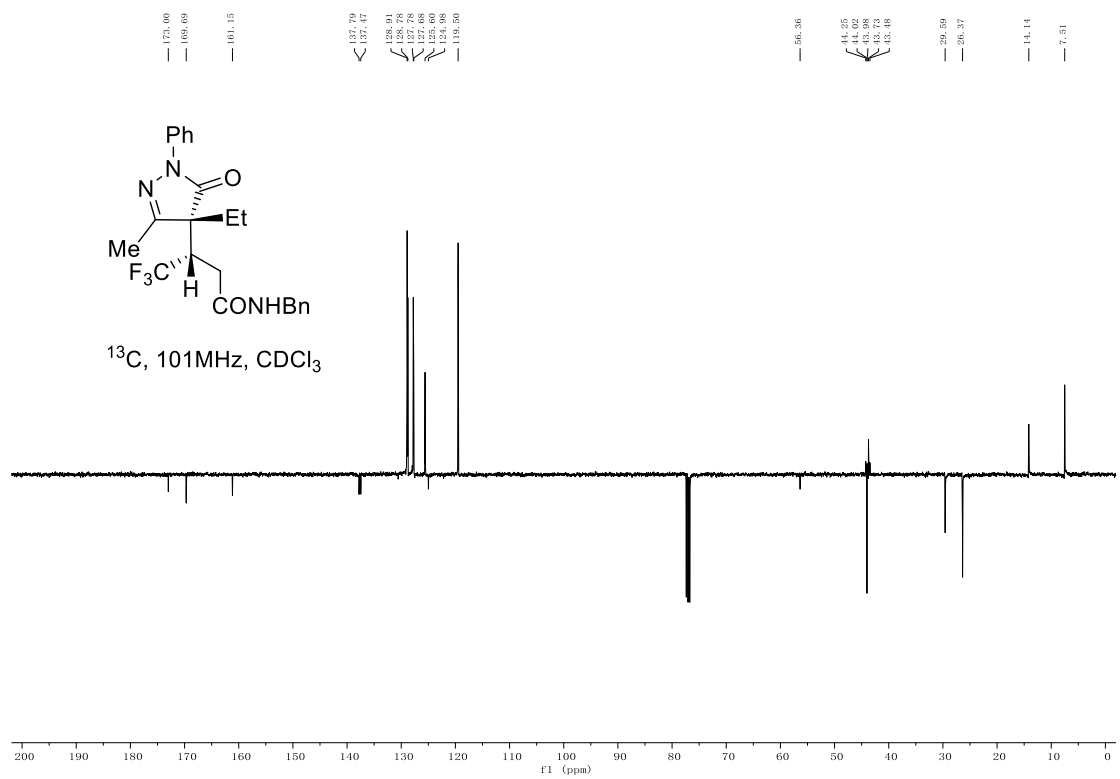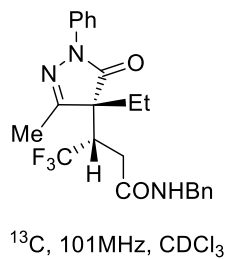

173.00 169.69 161.15 137.79 137.47 128.91 128.78 127.78 125.60 124.98 118.50 56.36 44.25 44.02 43.73 43.48 29.69 26.37 14.14 7.61

**(S)-3-((S)-4-allyl-3-methyl-5-oxo-1-phenyl-4,5-dihydro-1H-pyrazol-4-yl)-N-benzyl-4,4,4-trifluorobutanamide (28<sub>major</sub>)**

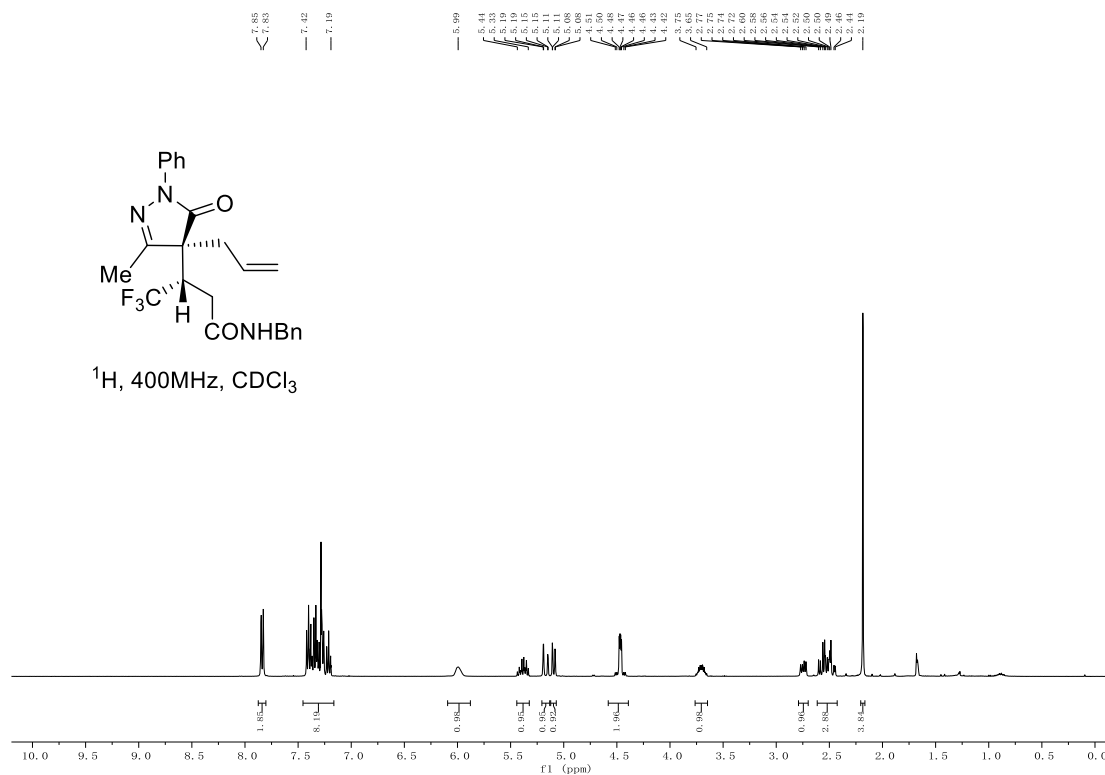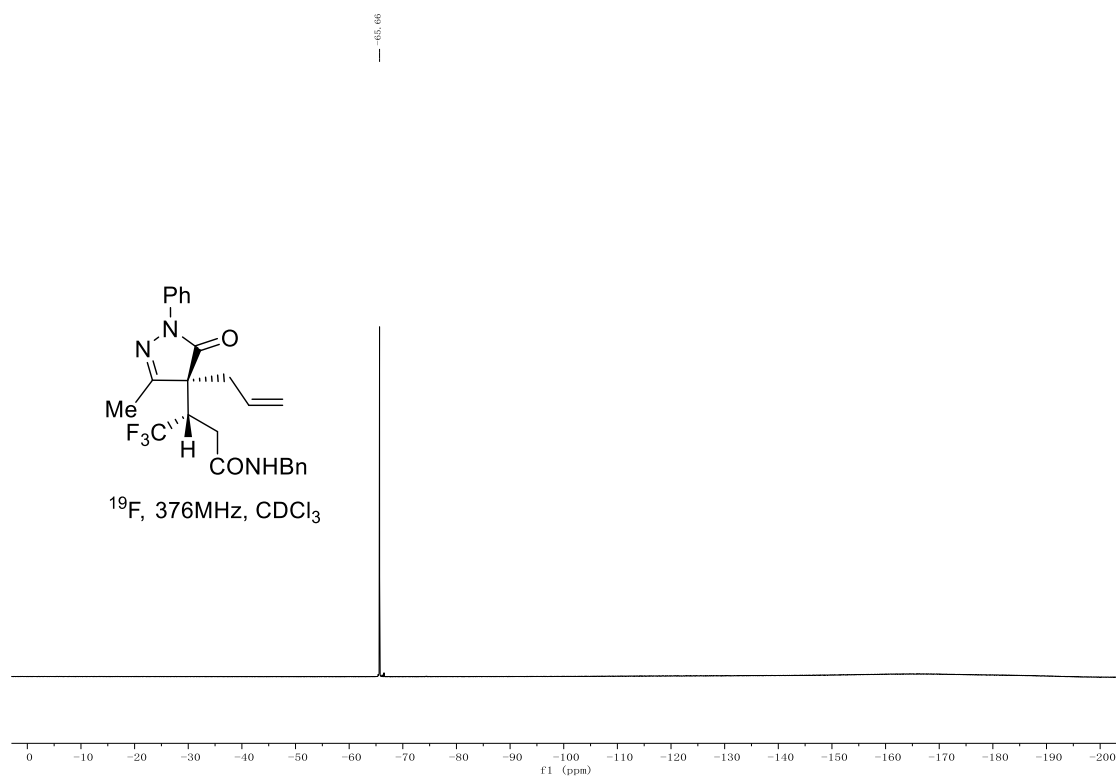

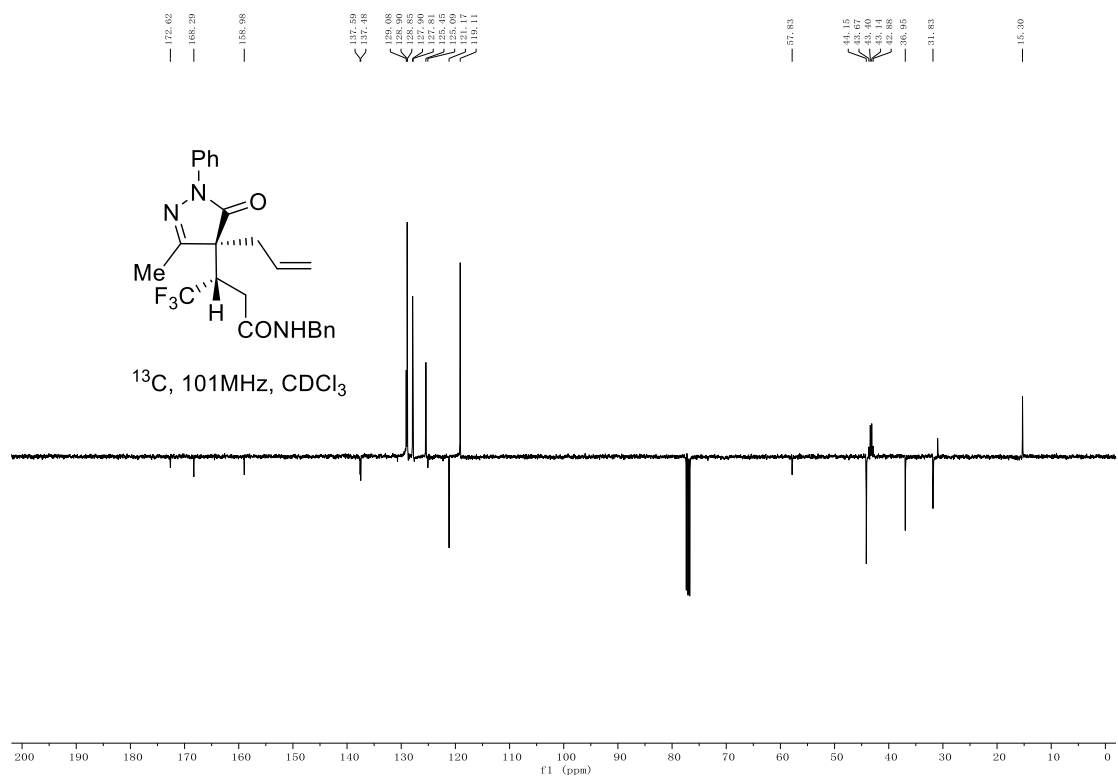

**(S)-3-((R)-4-allyl-3-methyl-5-oxo-1-phenyl-4,5-dihydro-1H-pyrazol-4-yl)-N-benzyl-4,4,4-trifluorobutanamide (28<sub>minor</sub>)**

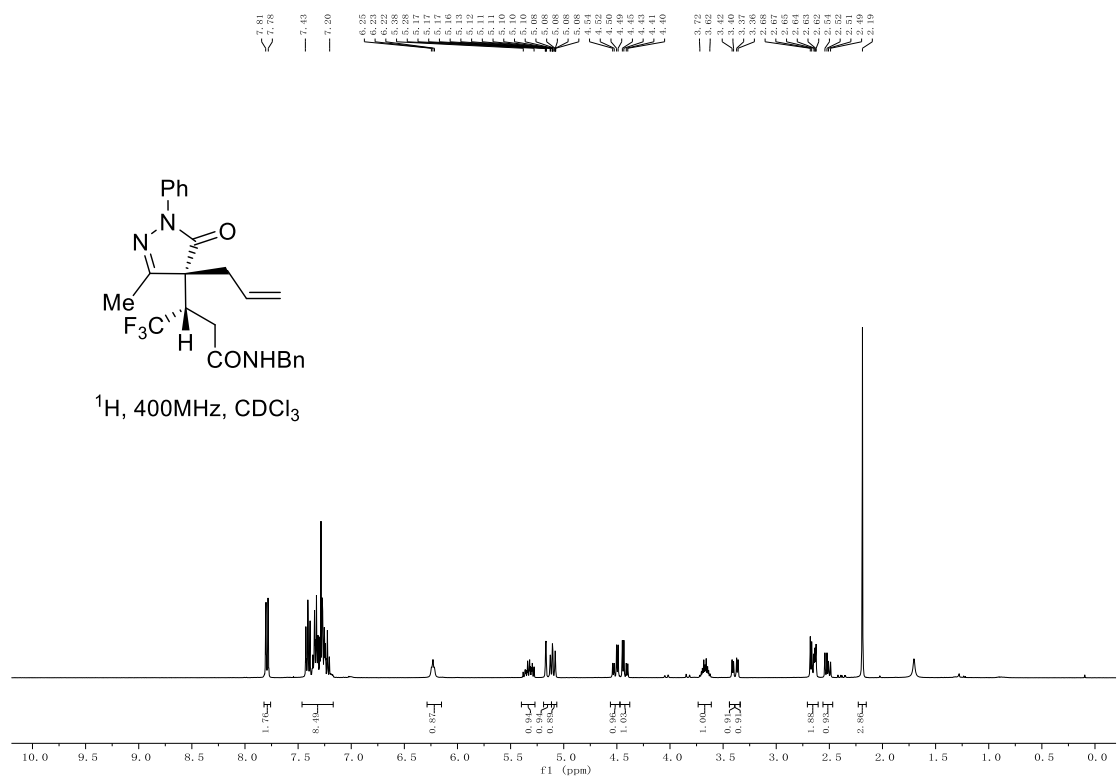

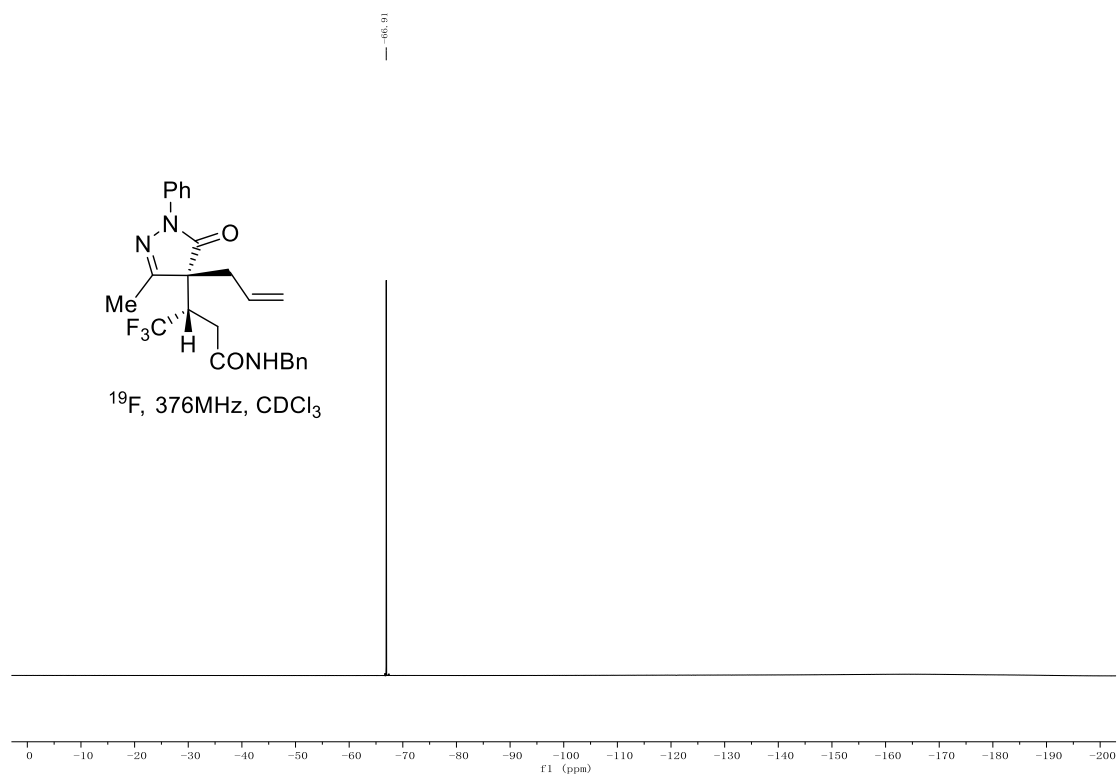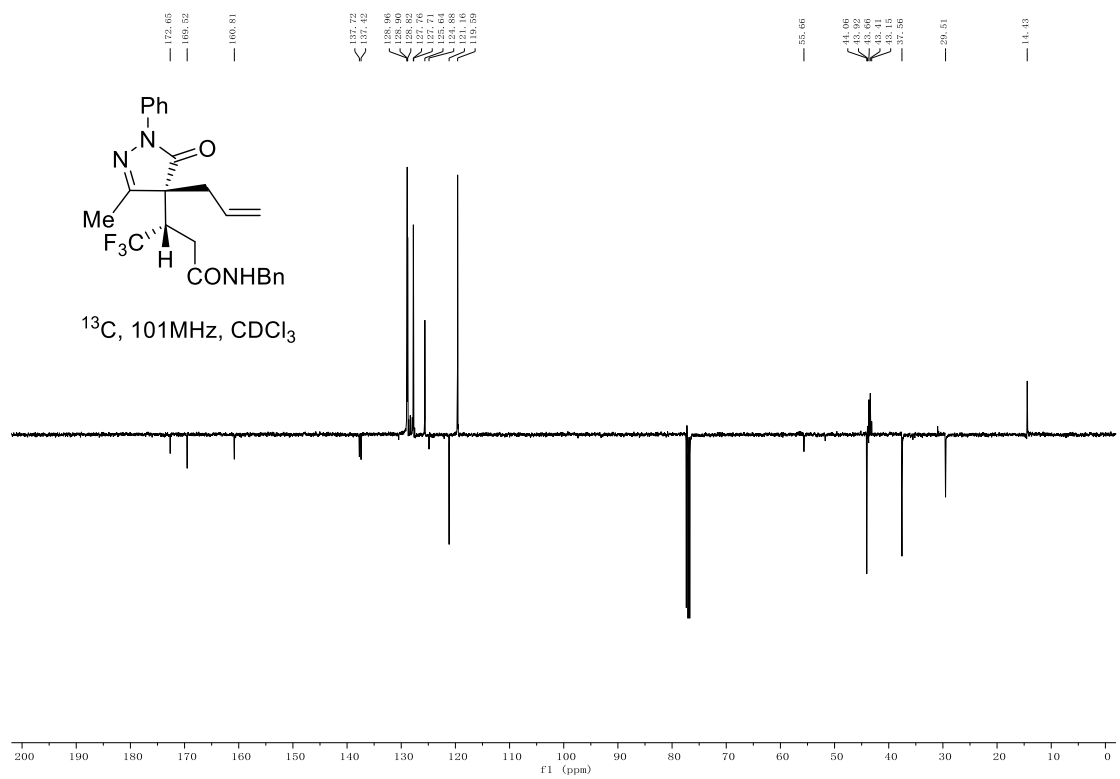

**(S)-N-benzyl-3-((S)-4-benzyl-3-methyl-5-oxo-1-phenyl-4,5-dihydro-1H-pyrazol-4-yl)-4,4,4-trifluorobutanamide (29<sub>major</sub>)**

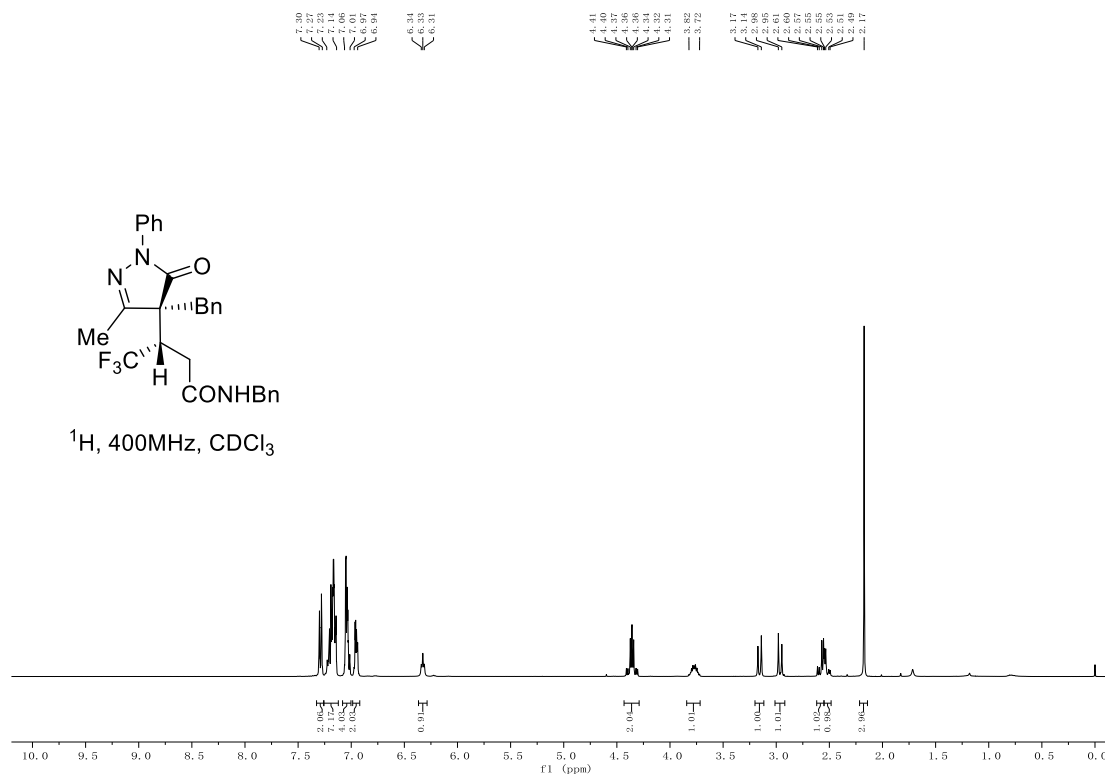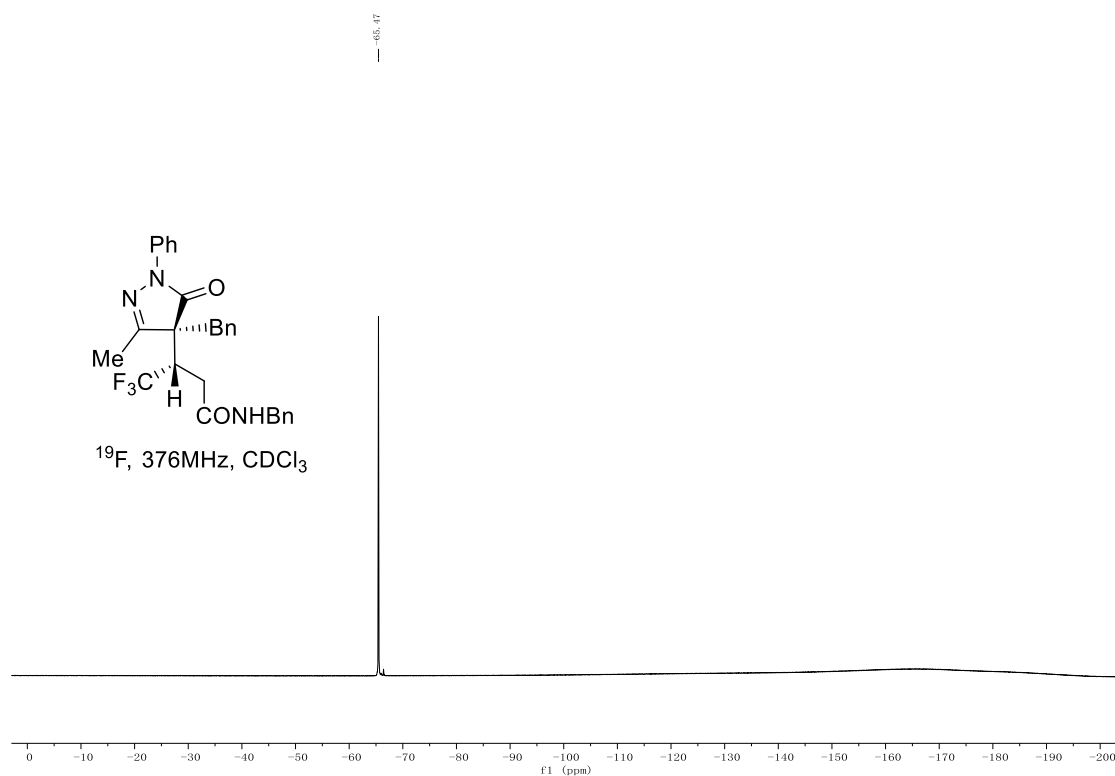

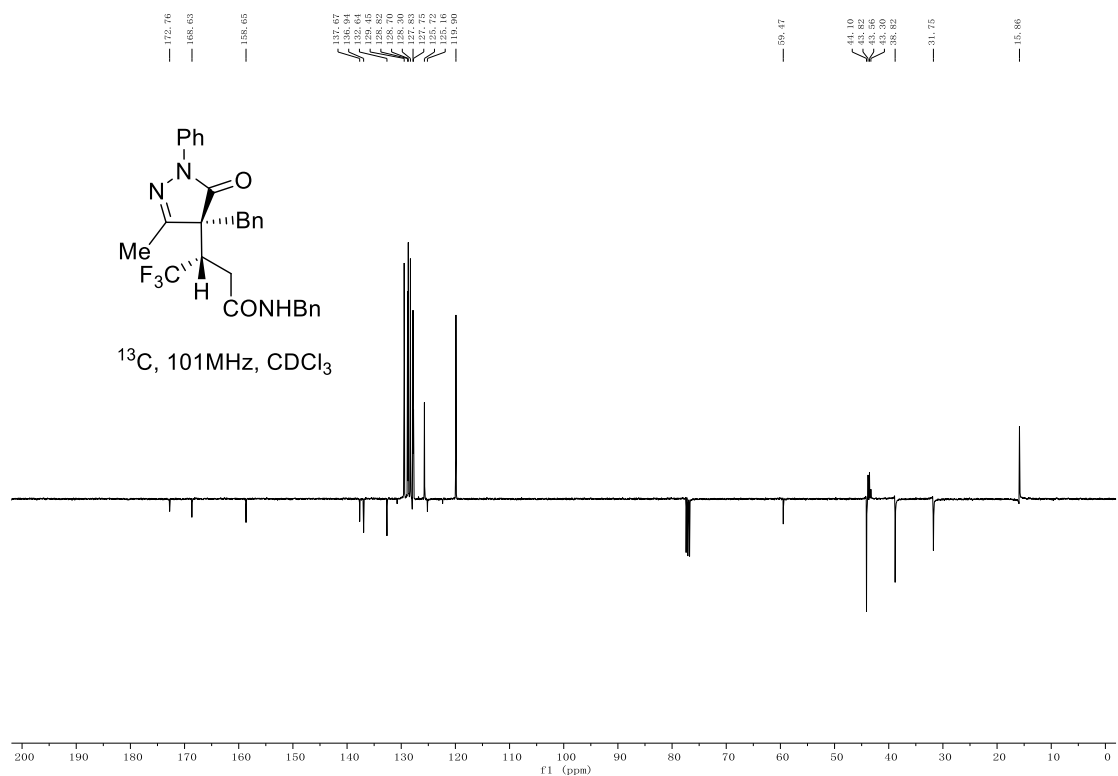

**(S)-N-benzyl-3-((R)-4-benzyl-3-methyl-5-oxo-1-phenyl-4,5-dihydro-1H-pyrazol-4-yl)-4,4,4-trifluorobutanamide (29<sub>minor</sub>)**

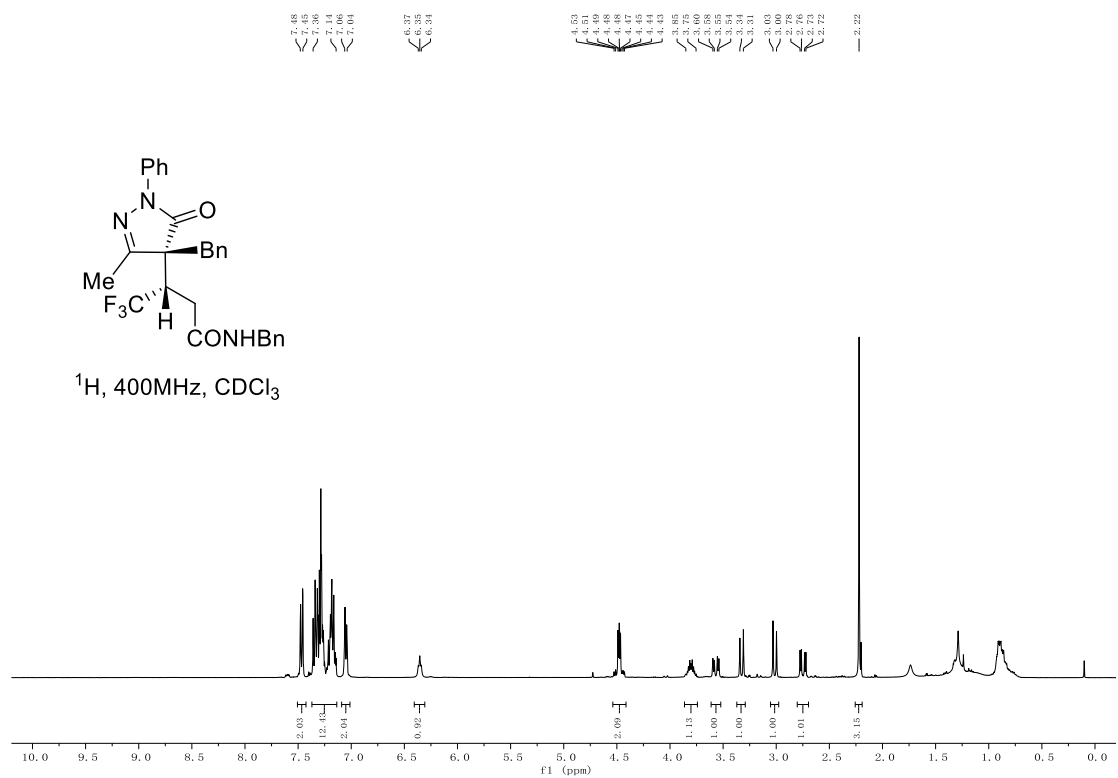

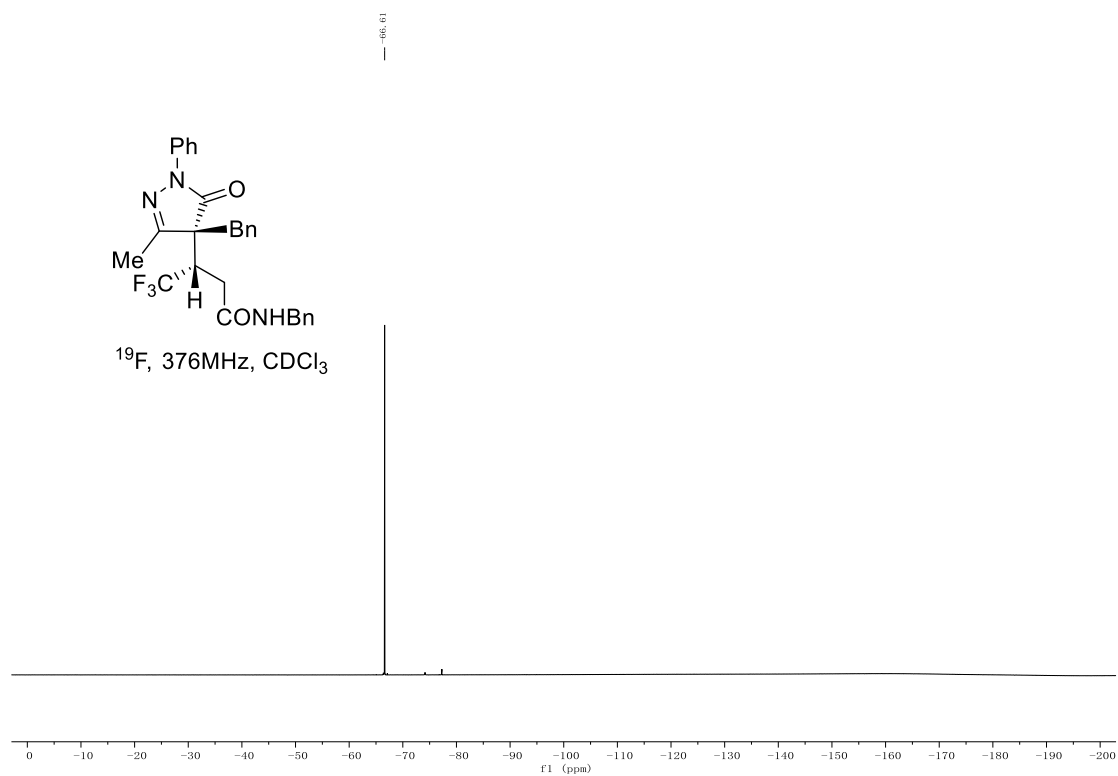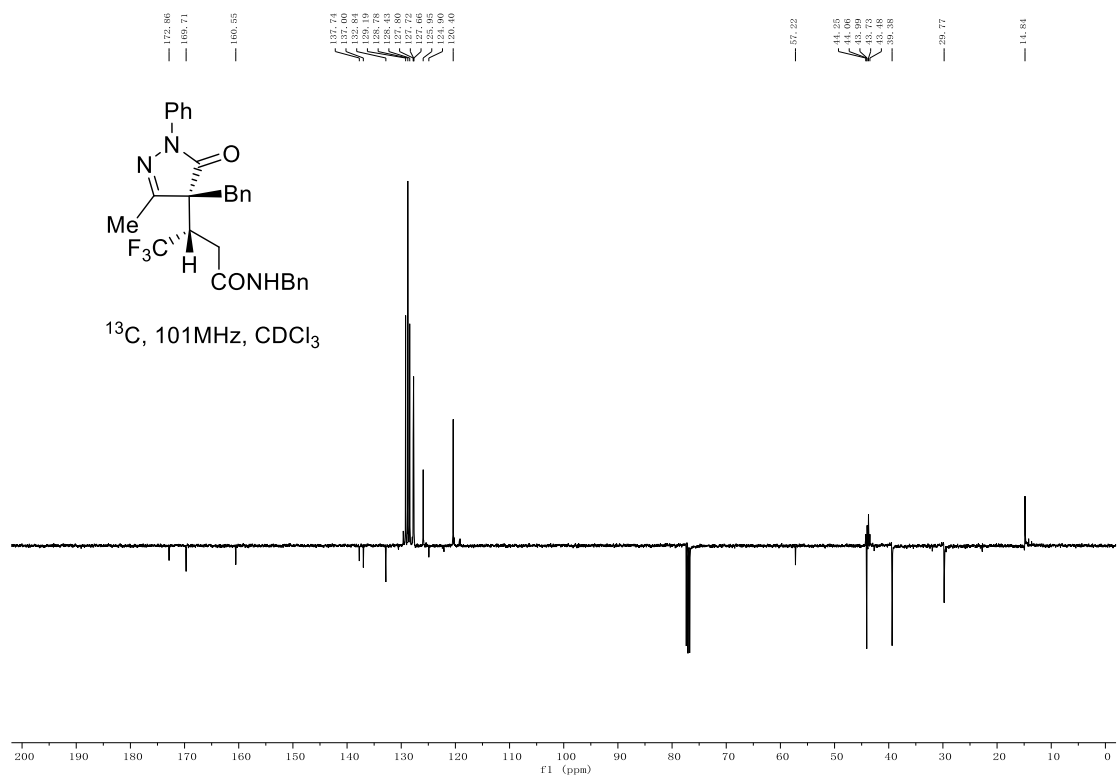



**(S)-N-benzyl-3-((S)-4-benzyl-5-oxo-1,3-diphenyl-4,5-dihydro-1H-pyrazol-4-yl)-4,4,4-trifluorobutanamide (30<sub>major</sub>)**

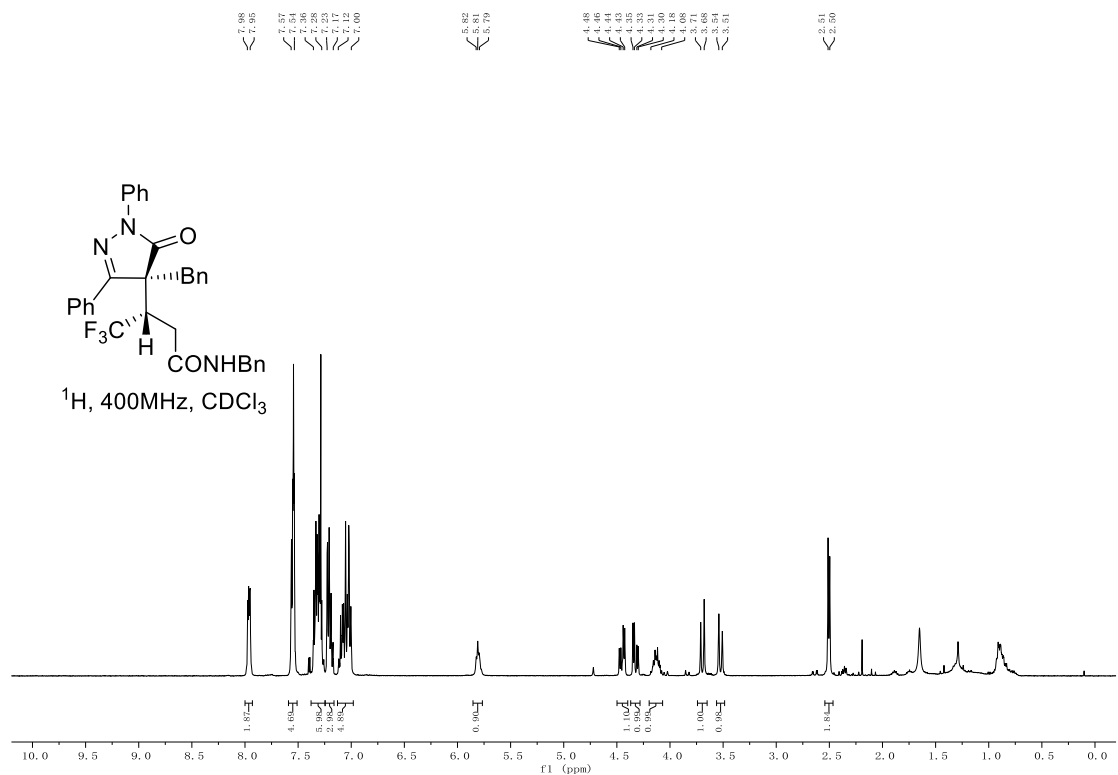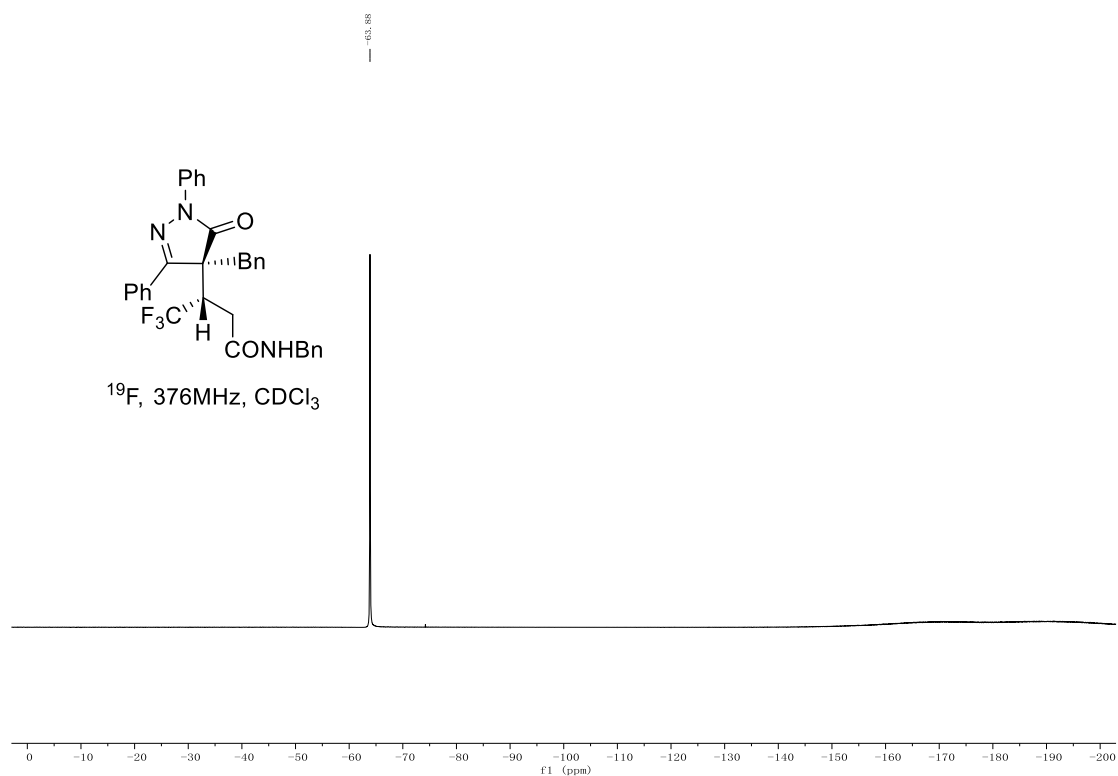



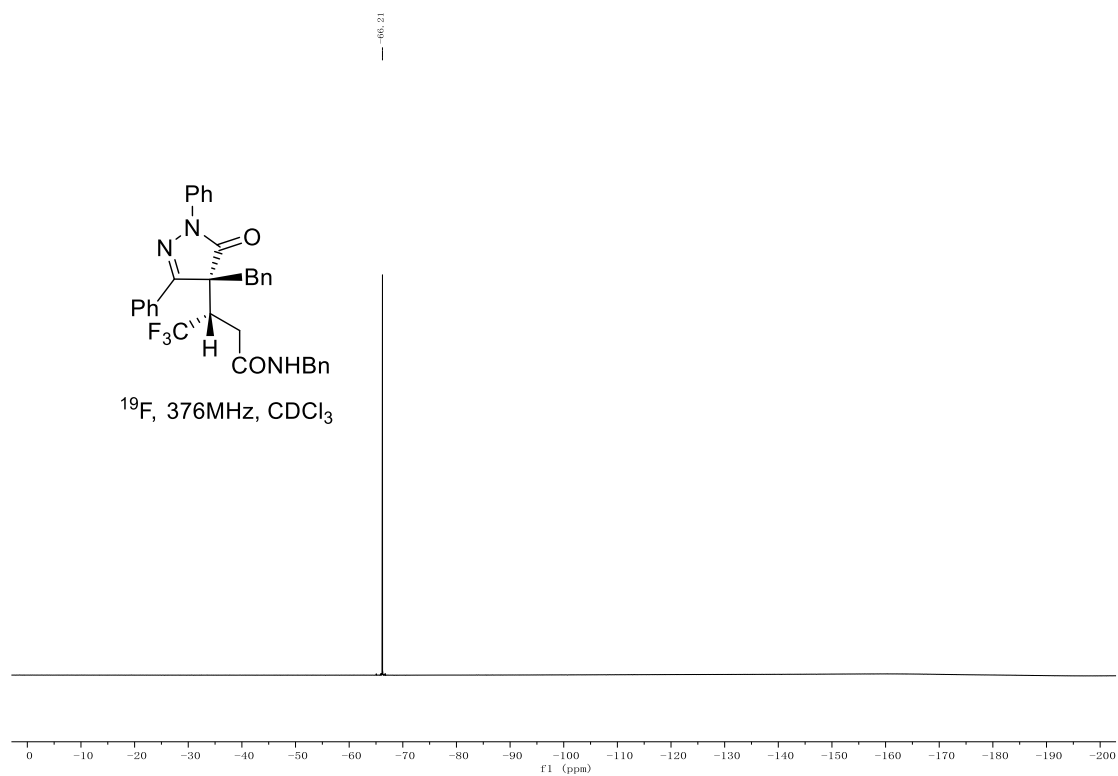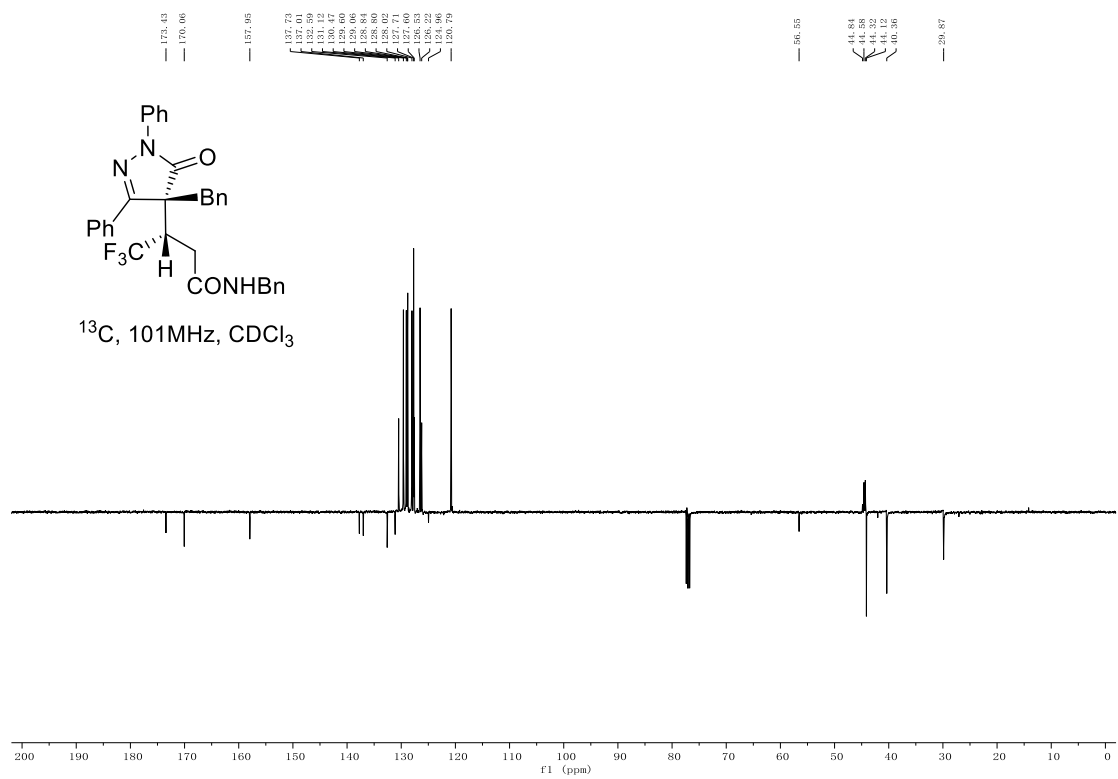

**(S)-N-benzyl-4,4,4-trifluoro-3-((S)-3-methyl-4-(2-methylbenzyl)-5-oxo-1-phenyl-4,5-dihydro-1H-pyrazol-4-yl)butanamide (31<sub>major</sub>)**

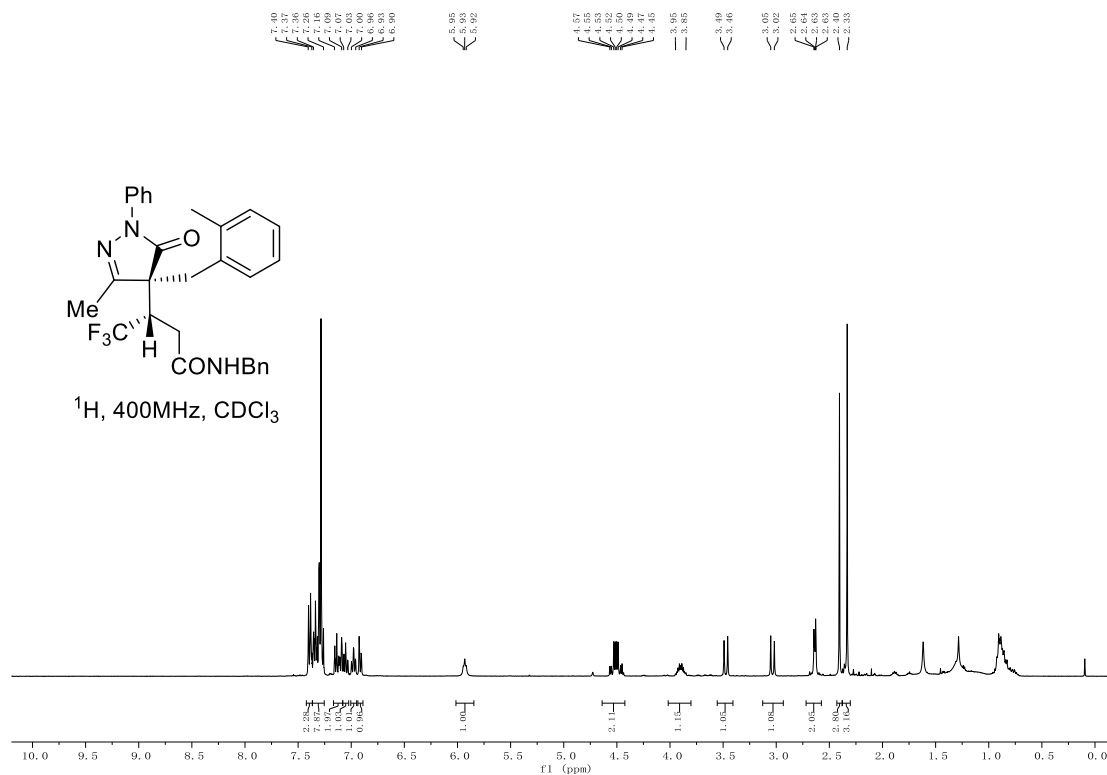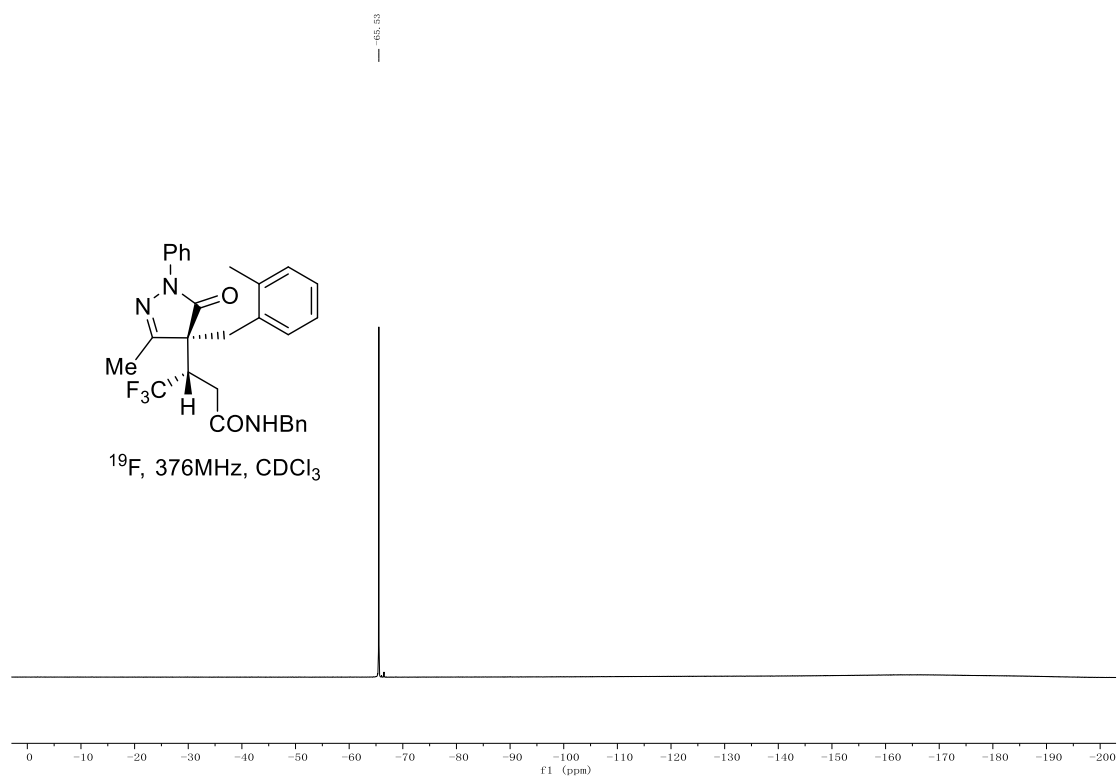

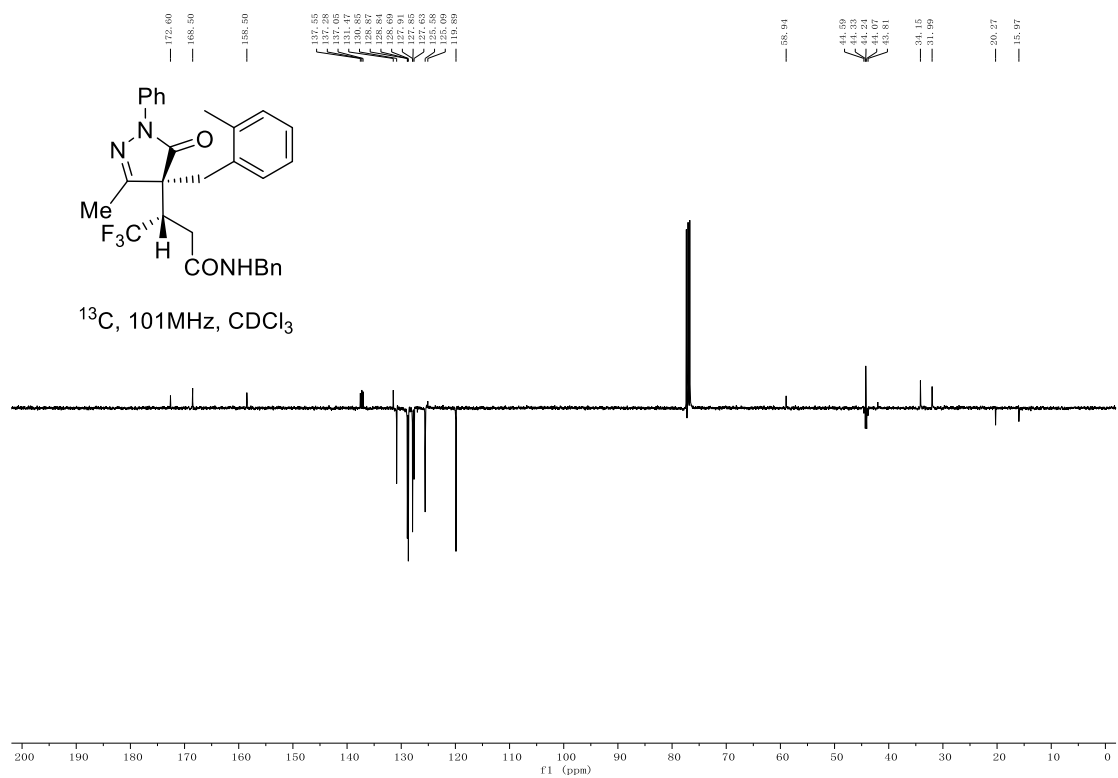

**(S)-N-benzyl-4,4,4-trifluoro-3-((R)-3-methyl-4-(2-methylbenzyl)-5-oxo-1-phenyl-4,5-dihydro-1H-pyrazol-4-yl)butanamide (31<sub>minor</sub>)**

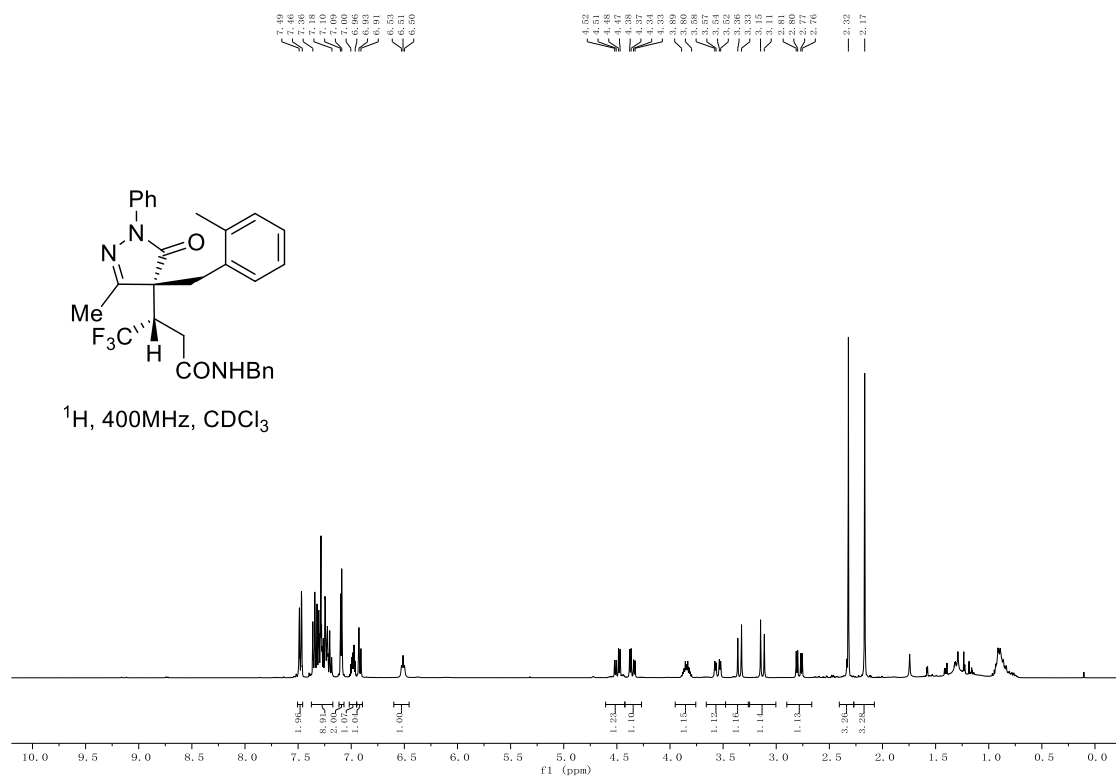



**(S)-N-benzyl-4,4,4-trifluoro-3-((S)-3-methyl-4-(3-methylbenzyl)-5-oxo-1-phenyl-4,5-dihydro-1H-pyrazol-4-yl)butanamide (32<sub>major</sub>)**

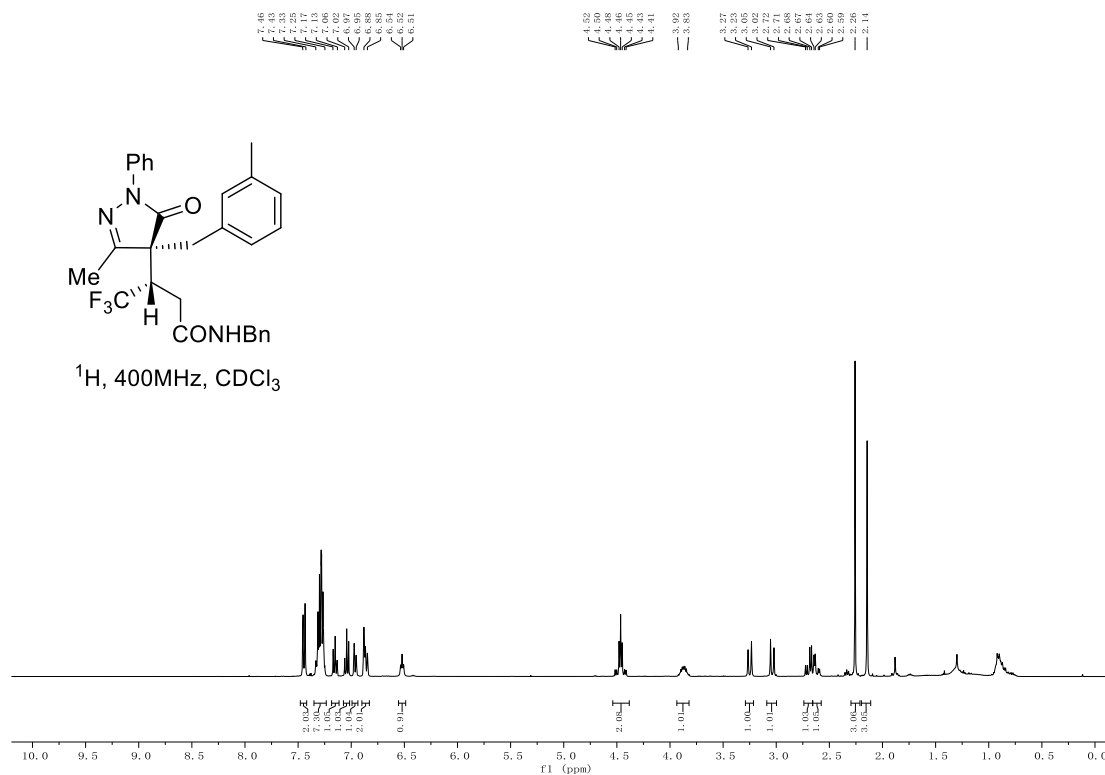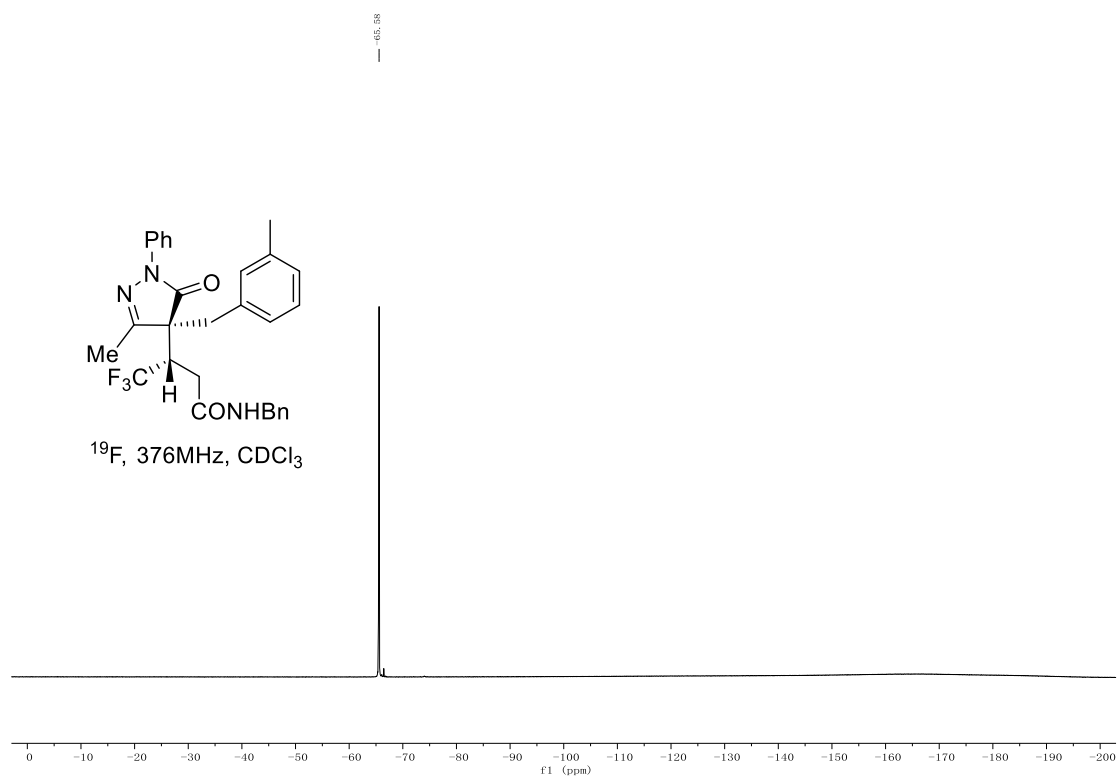

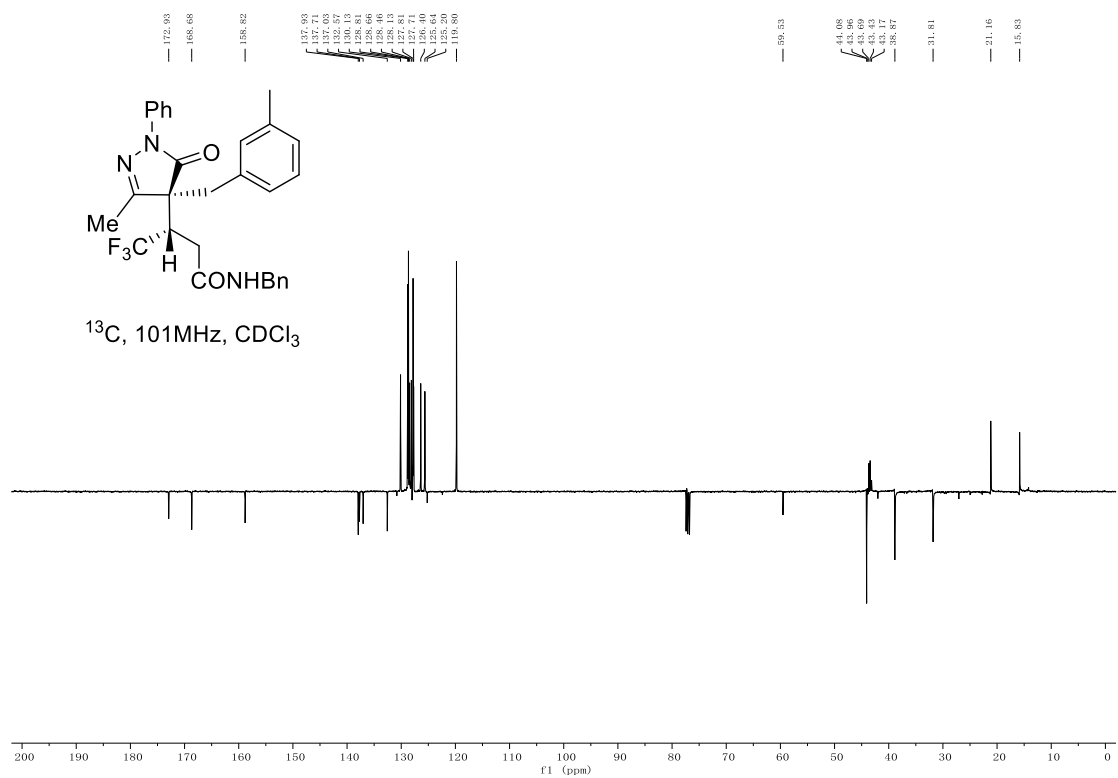

**(S)-N-benzyl-4,4,4-trifluoro-3-((R)-3-methyl-4-(3-methylbenzyl)-5-oxo-1-phenyl-4,5-dihydro-1H-pyrazol-4-yl)butanamide (32<sub>minor</sub>)**

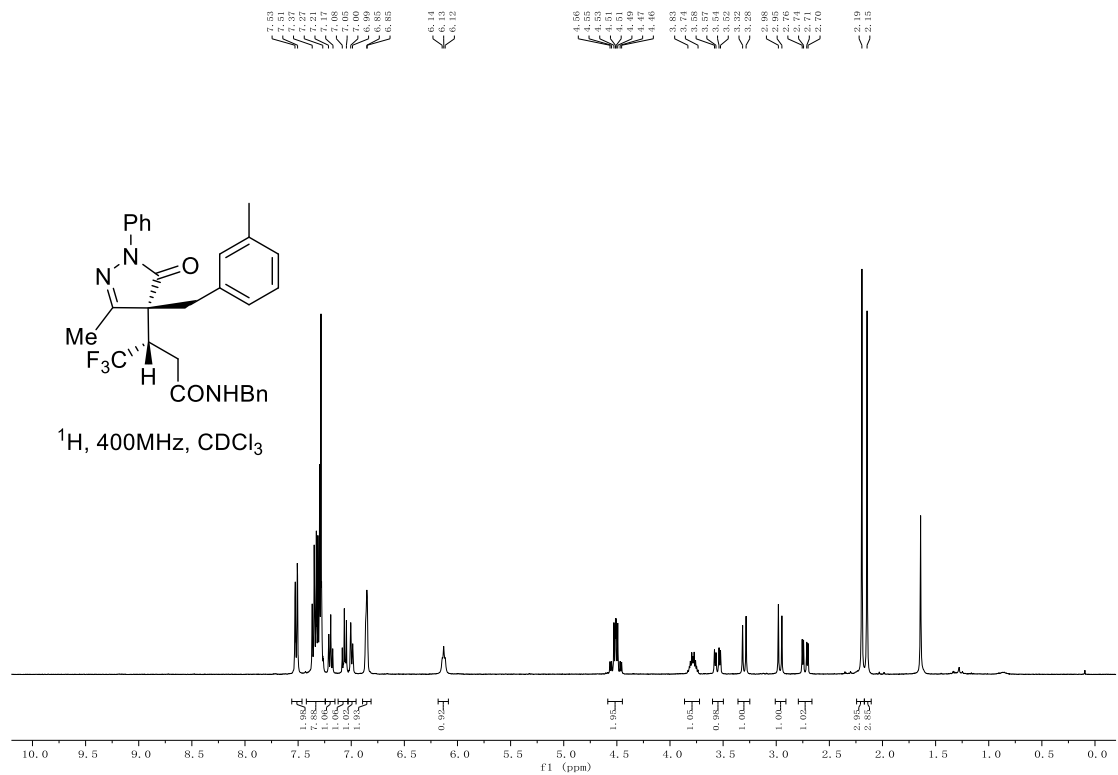



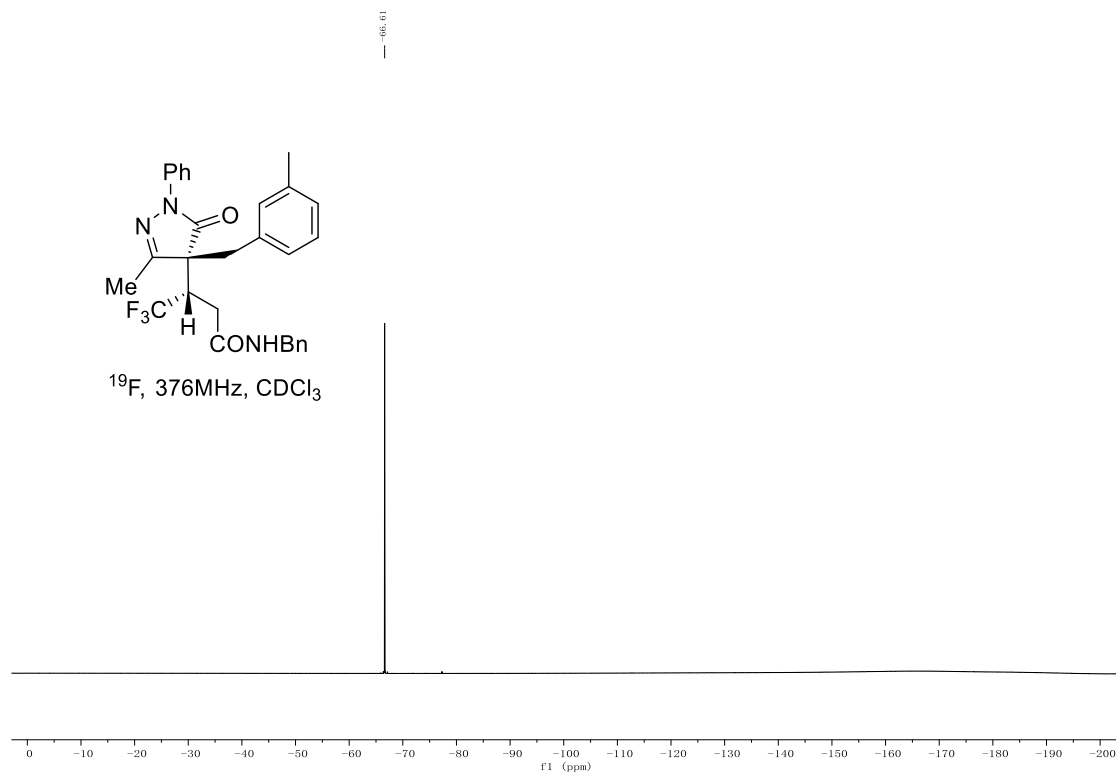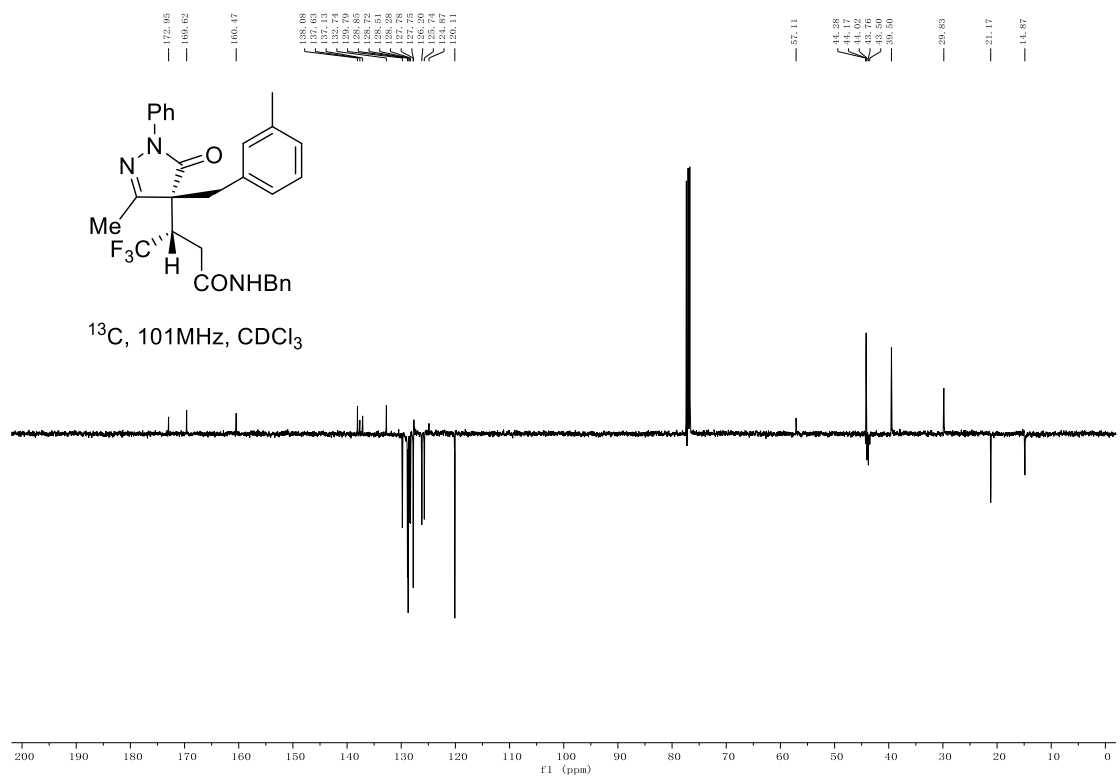

**(S)-N-benzyl-4,4,4-trifluoro-3-((S)-4-(4-chlorobenzyl)-3-methyl-5-oxo-1-phenyl-4,5-dihydro-1H-pyrazol-4-yl)butanamide (33<sub>major</sub>)**

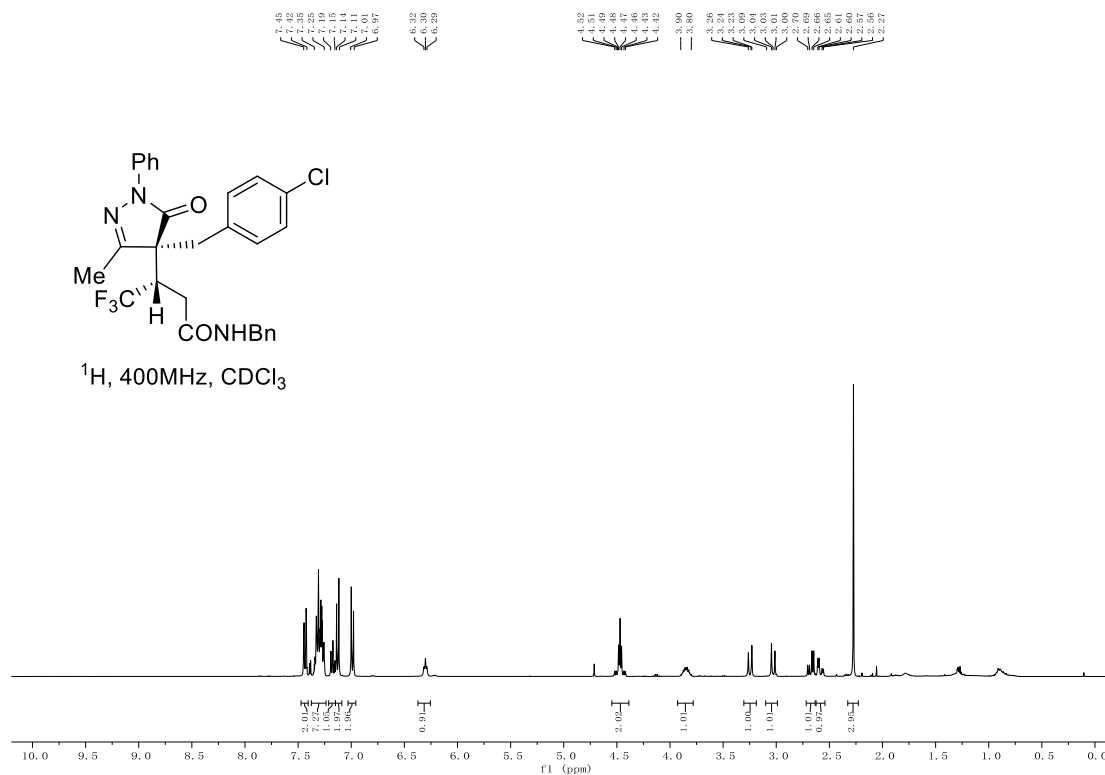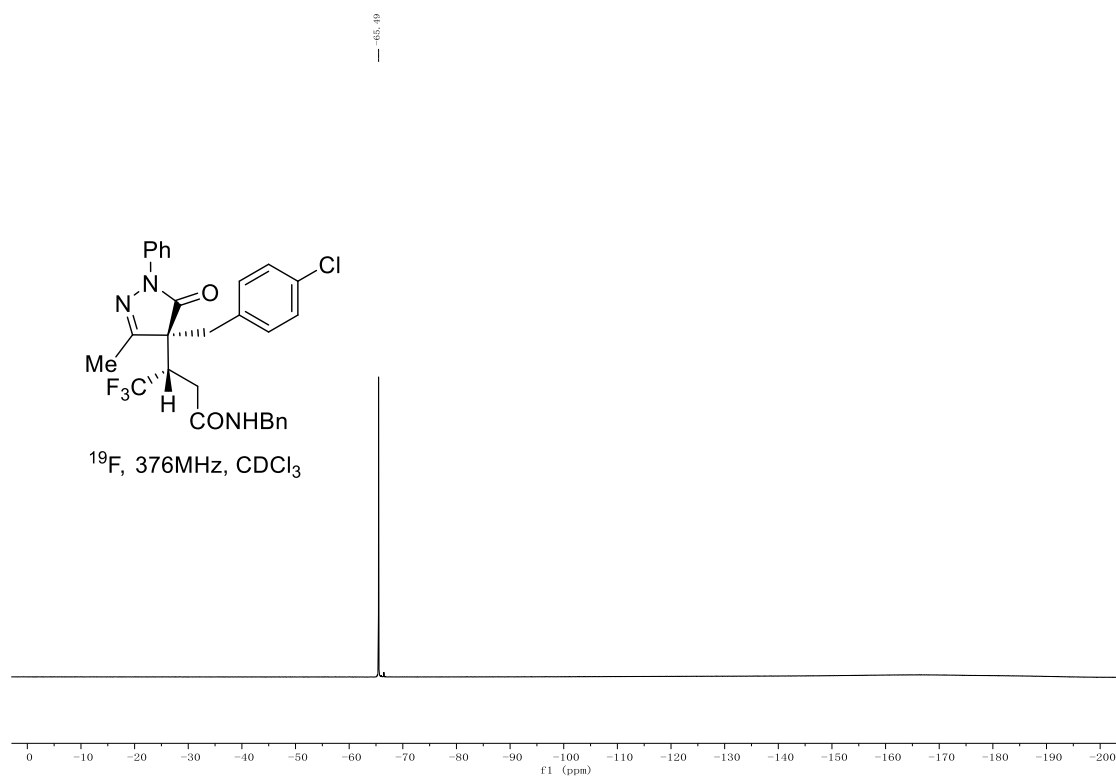

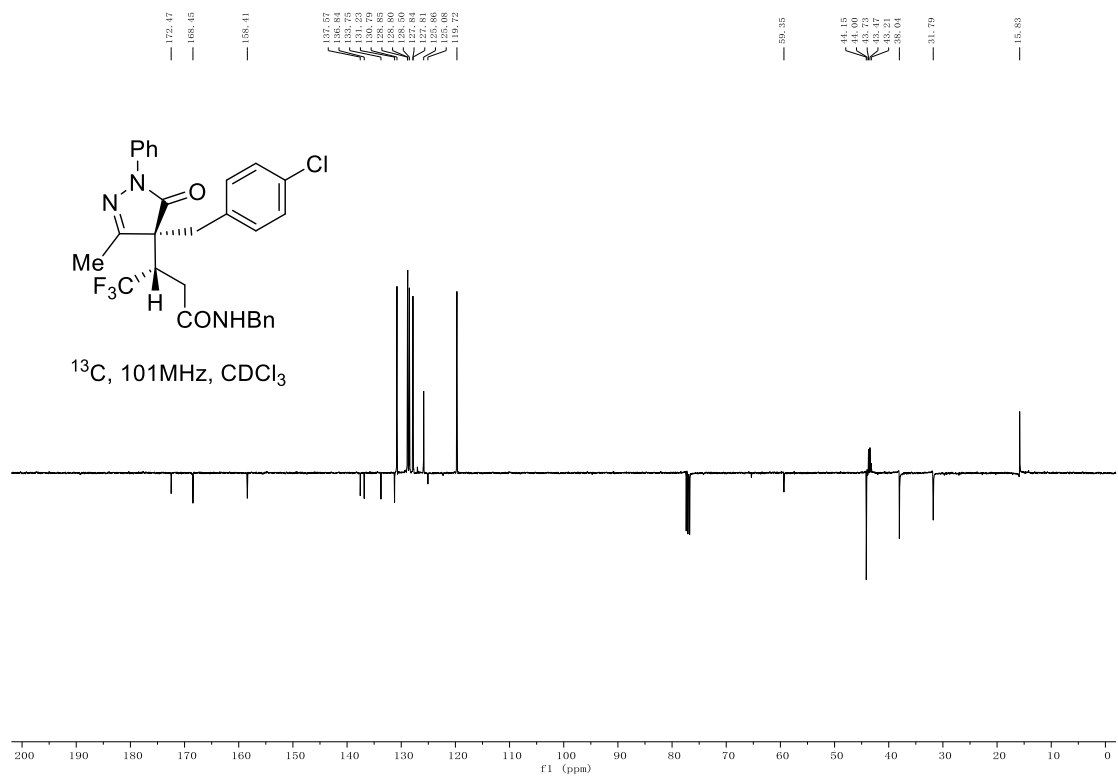

**(S)-N-benzyl-4,4,4-trifluoro-3-((R)-4-(4-chlorobenzyl)-3-methyl-5-oxo-1-phenyl-4,5-dihydro-1H-pyrazol-4-yl)butanamide (33<sub>minor</sub>)**

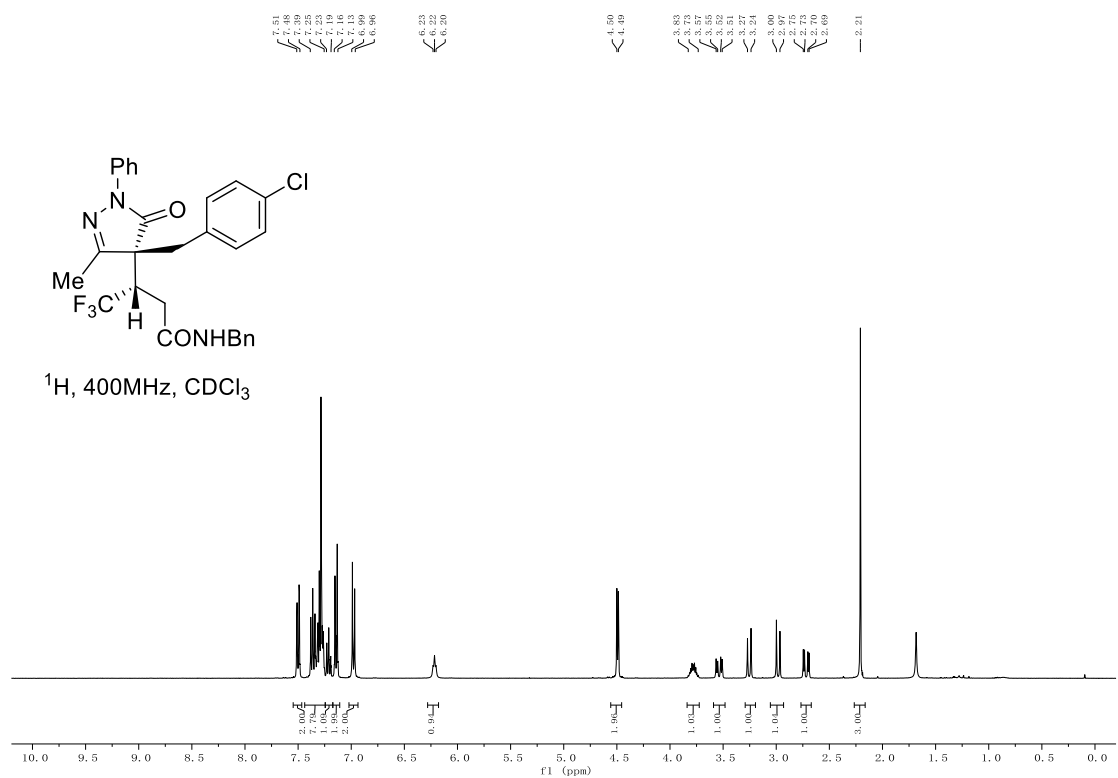

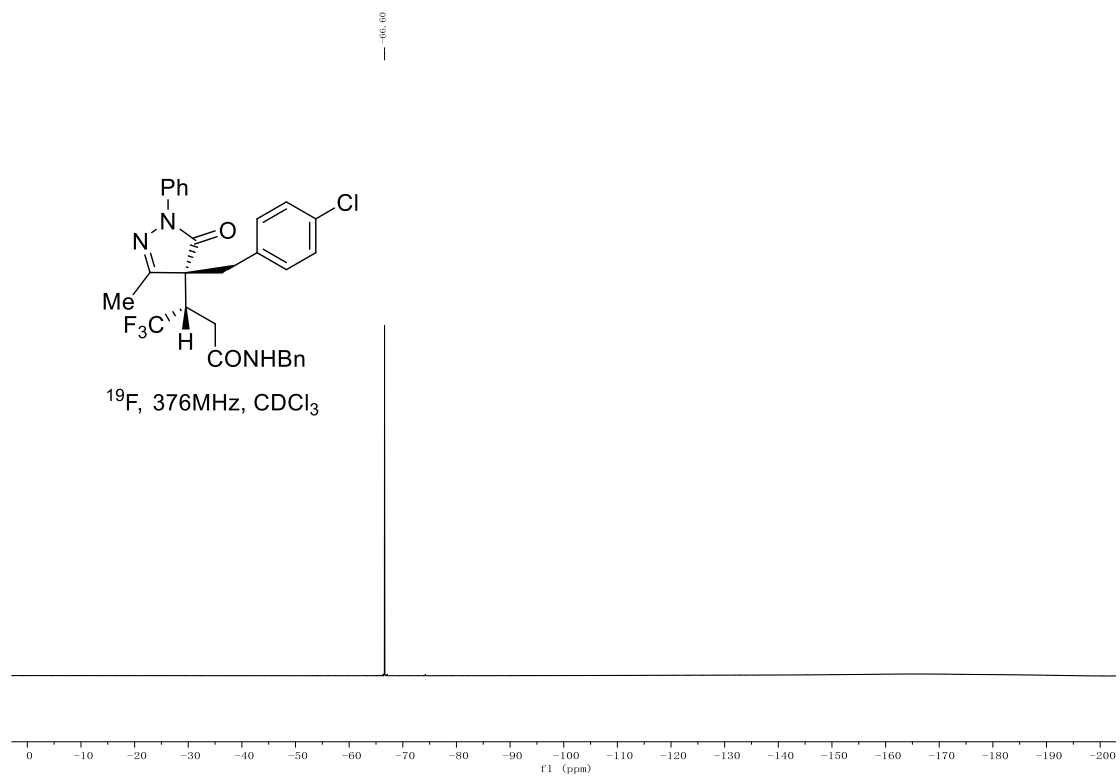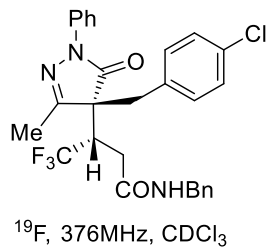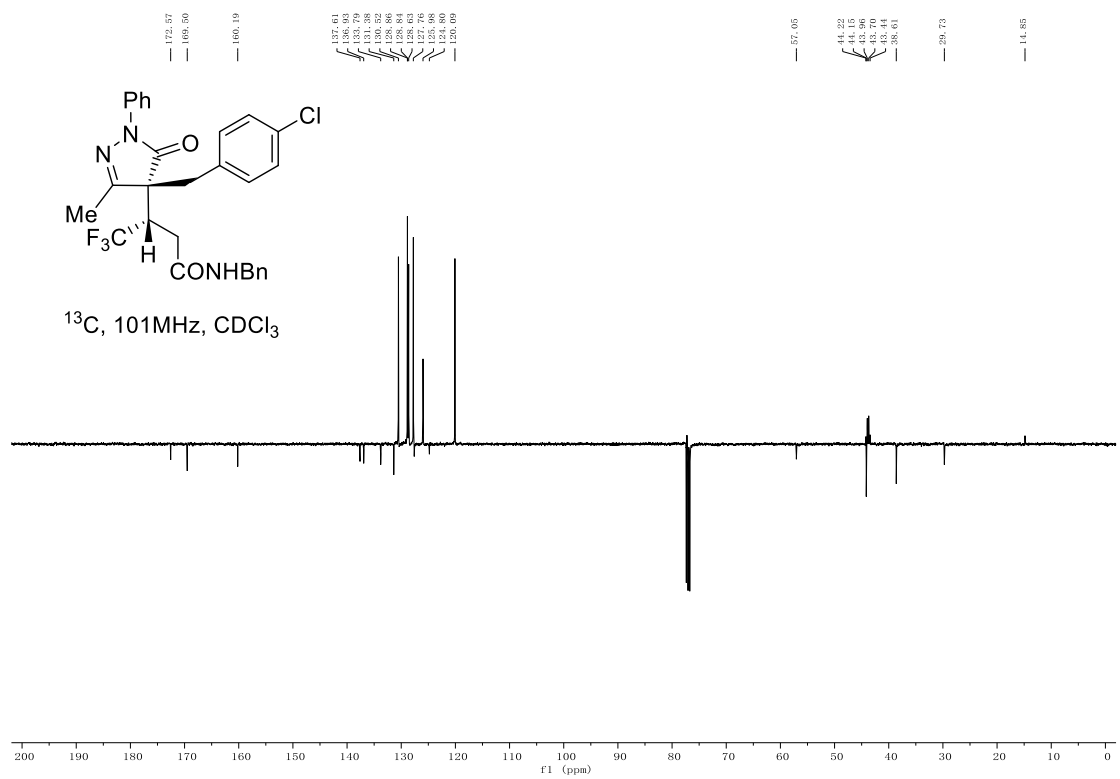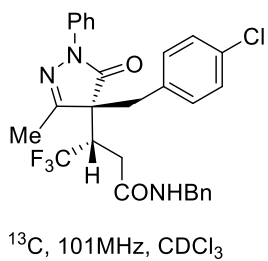

**(S)-N-benzyl-3-((S)-4-(4-cyanobenzyl)-3-methyl-5-oxo-1-phenyl-4,5-dihydro-1H-pyrazol-4-yl)-4,4,4-trifluorobutanamide (34<sub>major</sub>)**

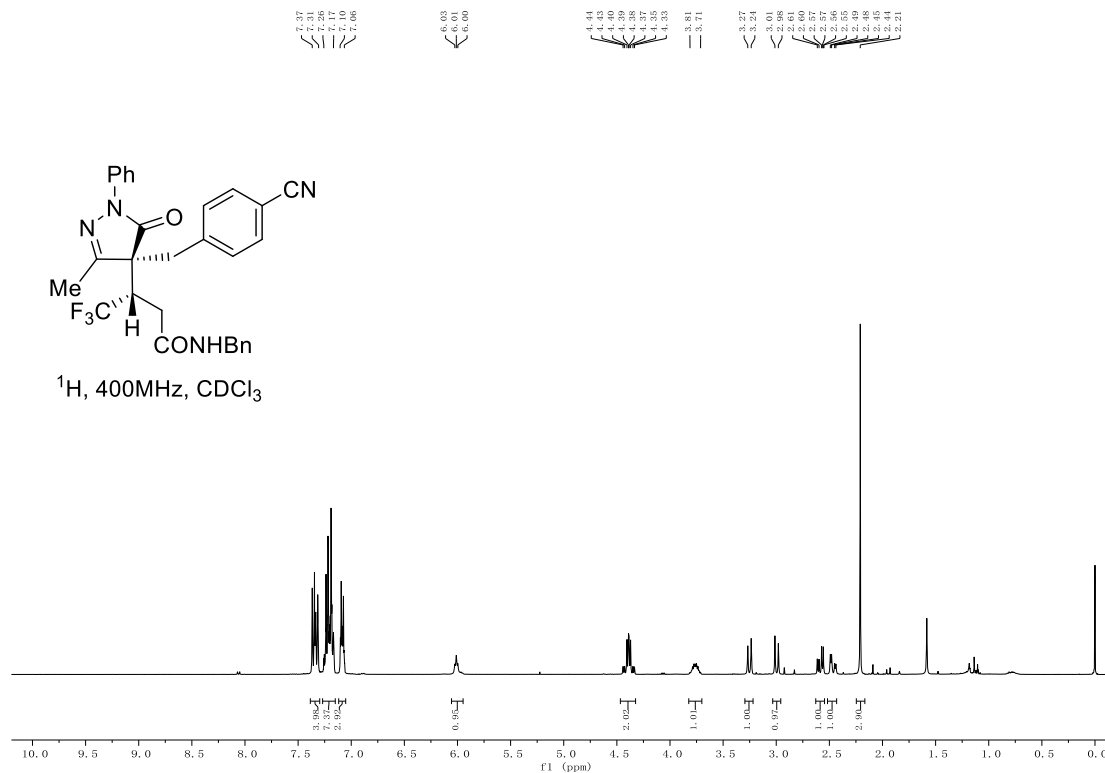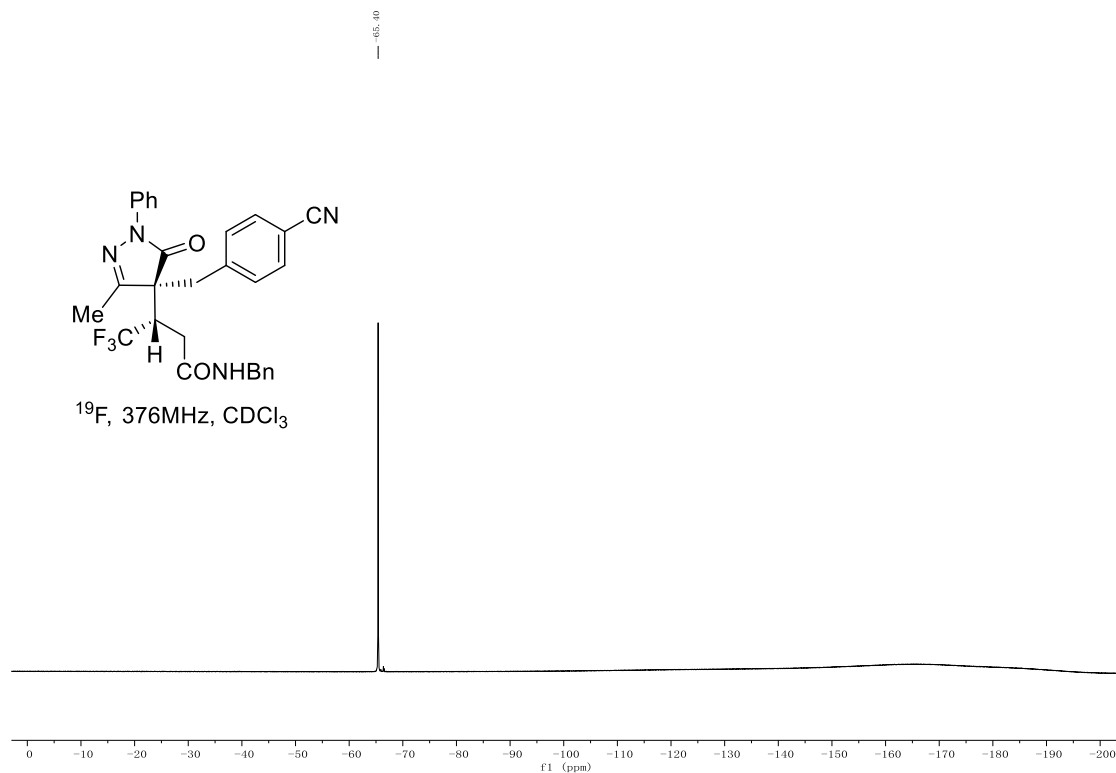

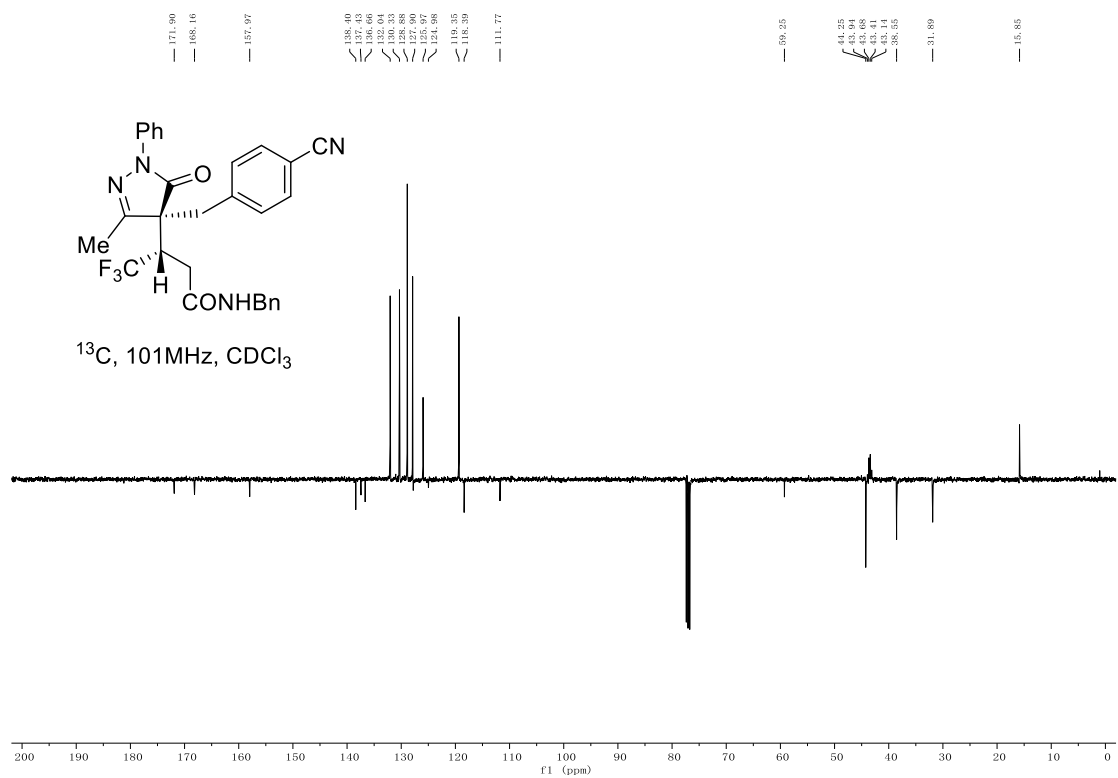

**(S)-N-benzyl-3-((R)-4-(4-cyanobenzyl)-3-methyl-5-oxo-1-phenyl-4,5-dihydro-1H-pyrazol-4-yl)-4,4,4-trifluorobutanamide (34<sub>minor</sub>)**

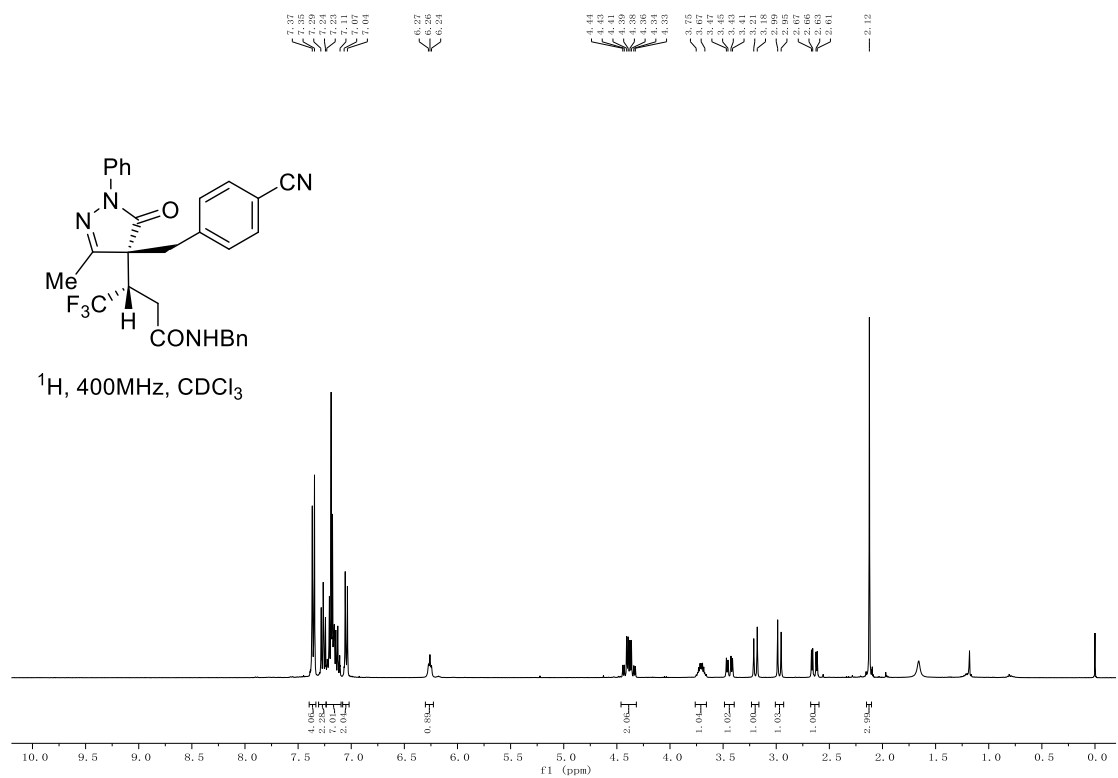

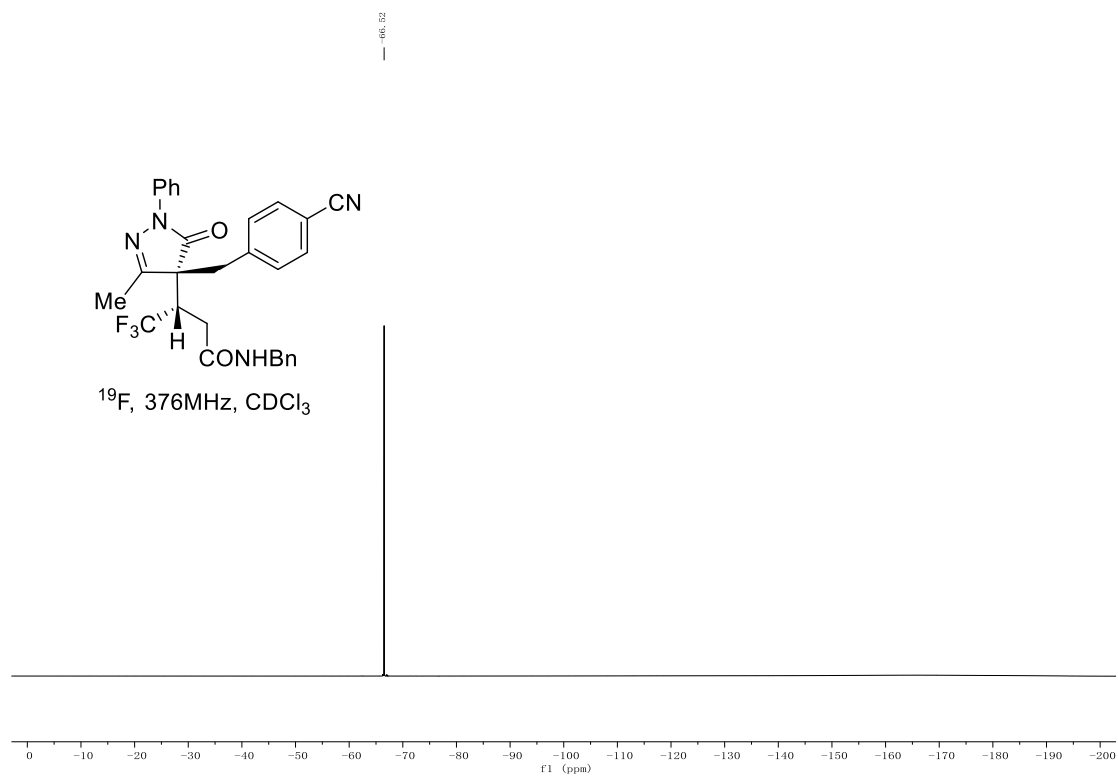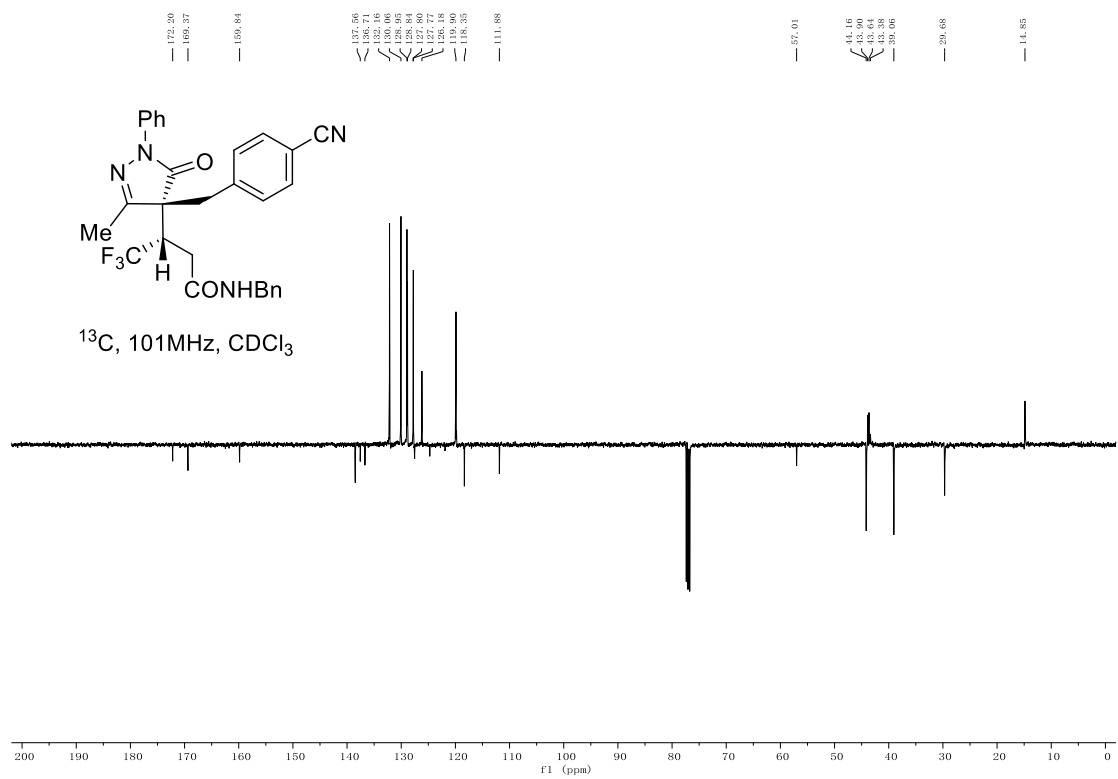

**(S)-N-benzyl-4,4,4-trifluoro-3-((R)-3-methyl-5-oxo-1,4-diphenyl-4,5-dihydro-1H-pyrazol-4-yl)butanamide (35<sub>major</sub>)**

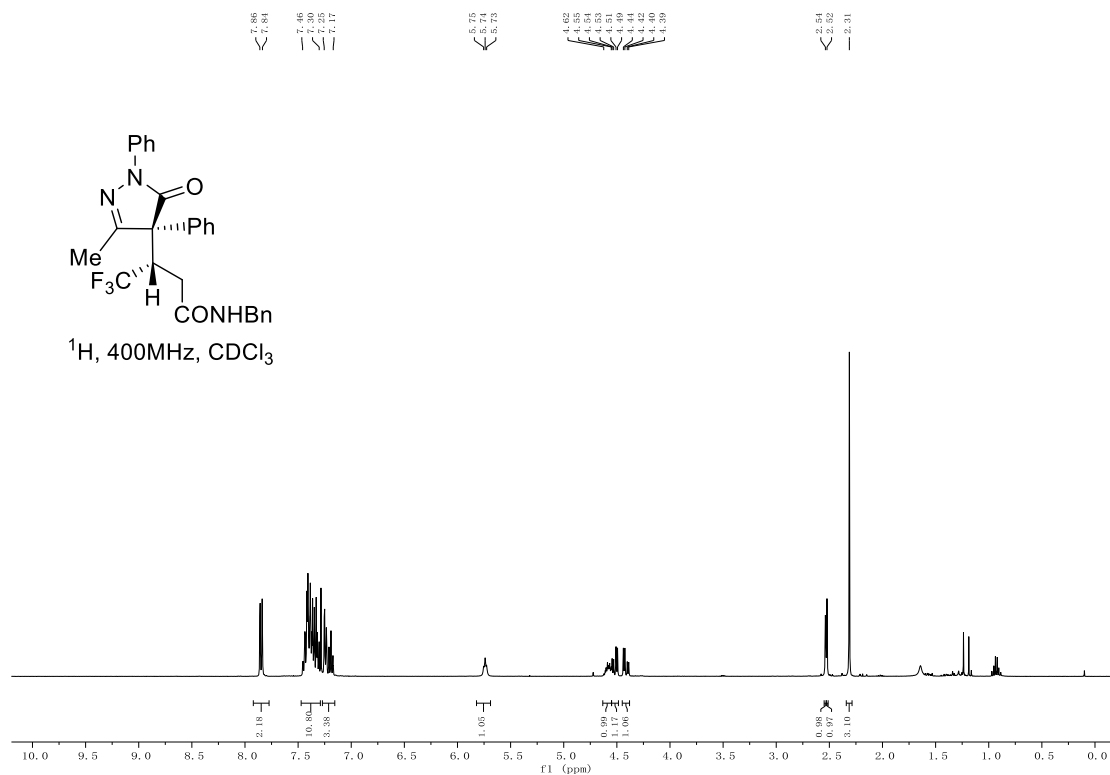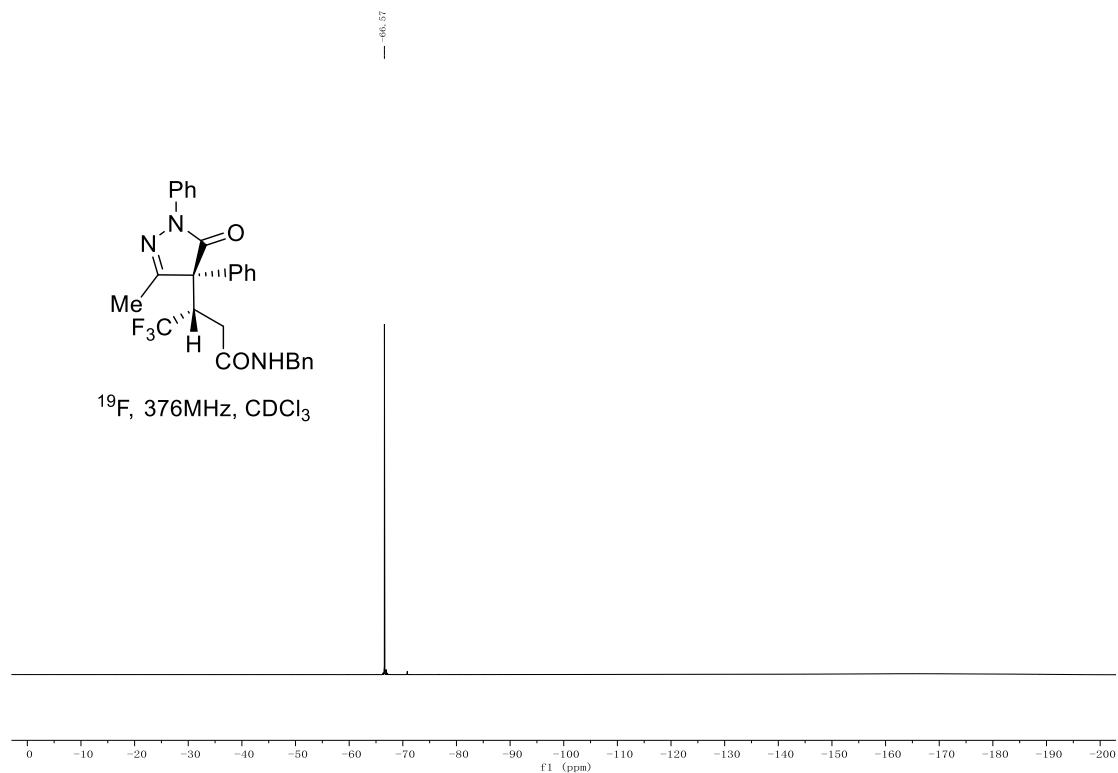



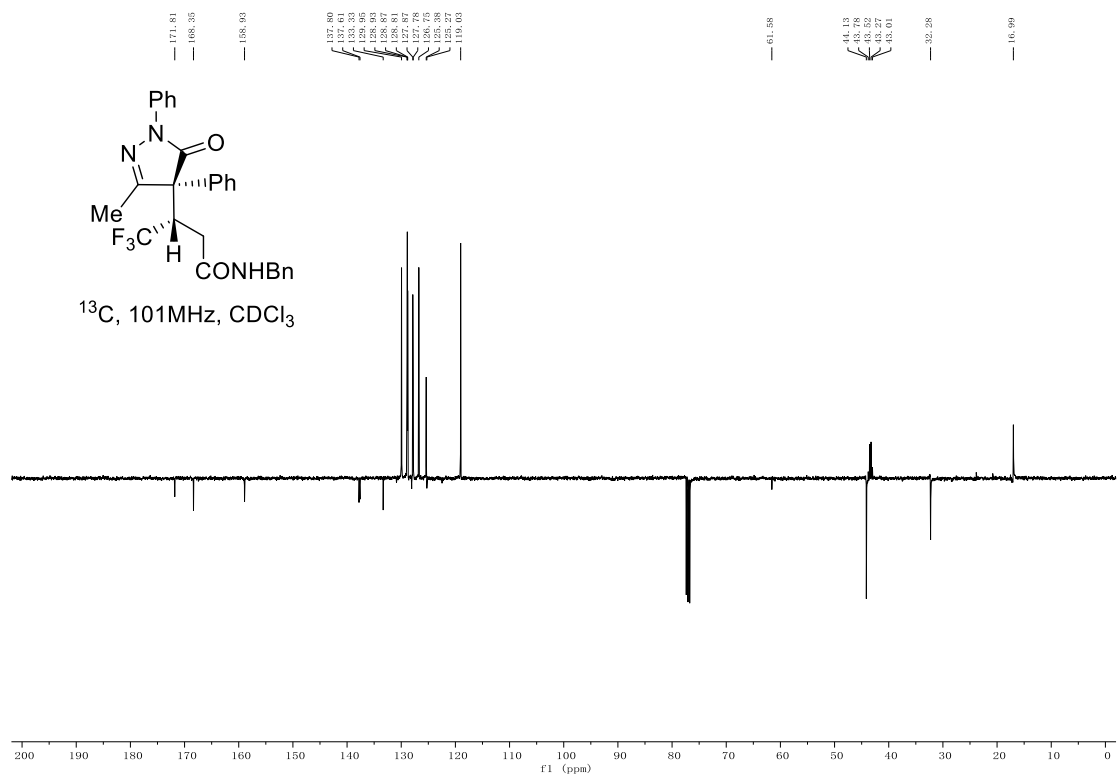

**(S)-N-benzyl-4,4,4-trifluoro-3-((S)-3-methyl-5-oxo-1,4-diphenyl-4,5-dihydro-1H-pyrazol-4-yl)butanamide (35<sub>minor</sub>)**

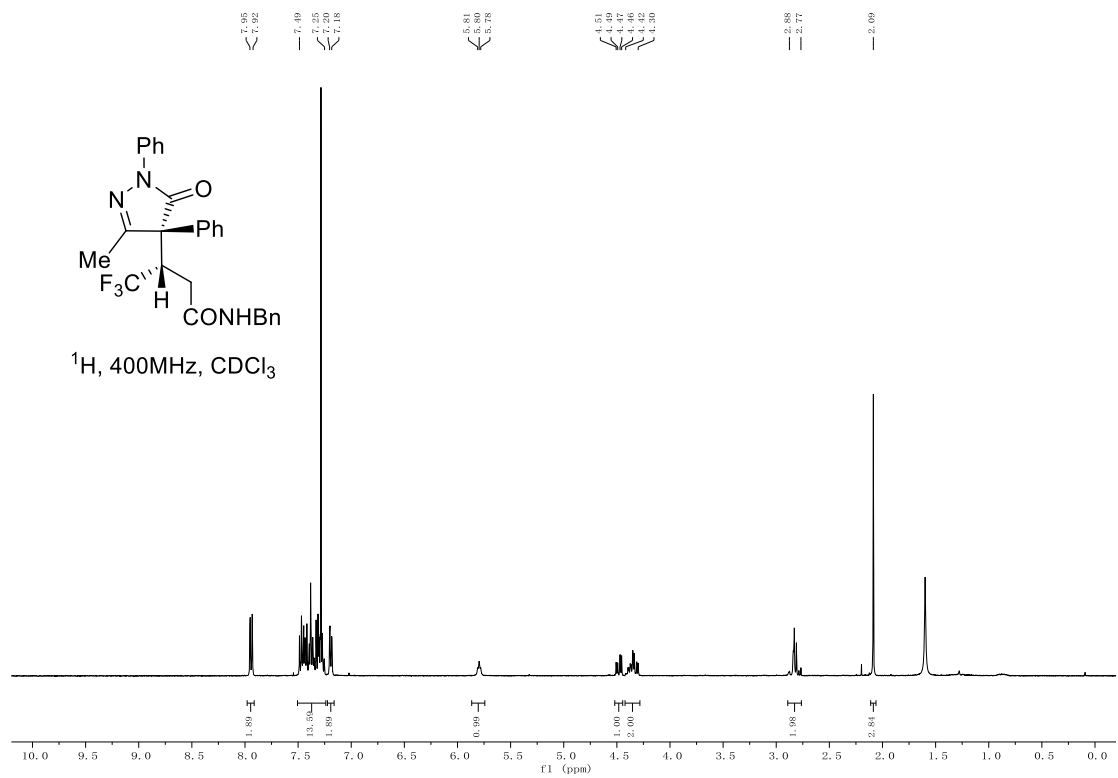

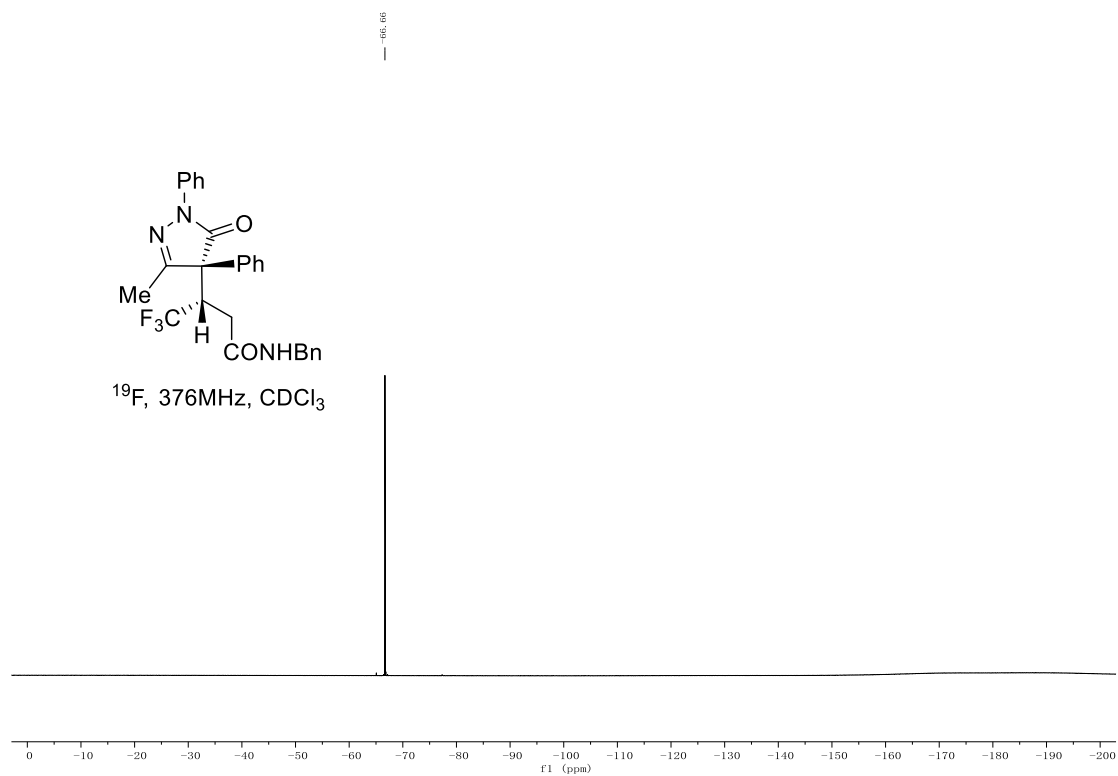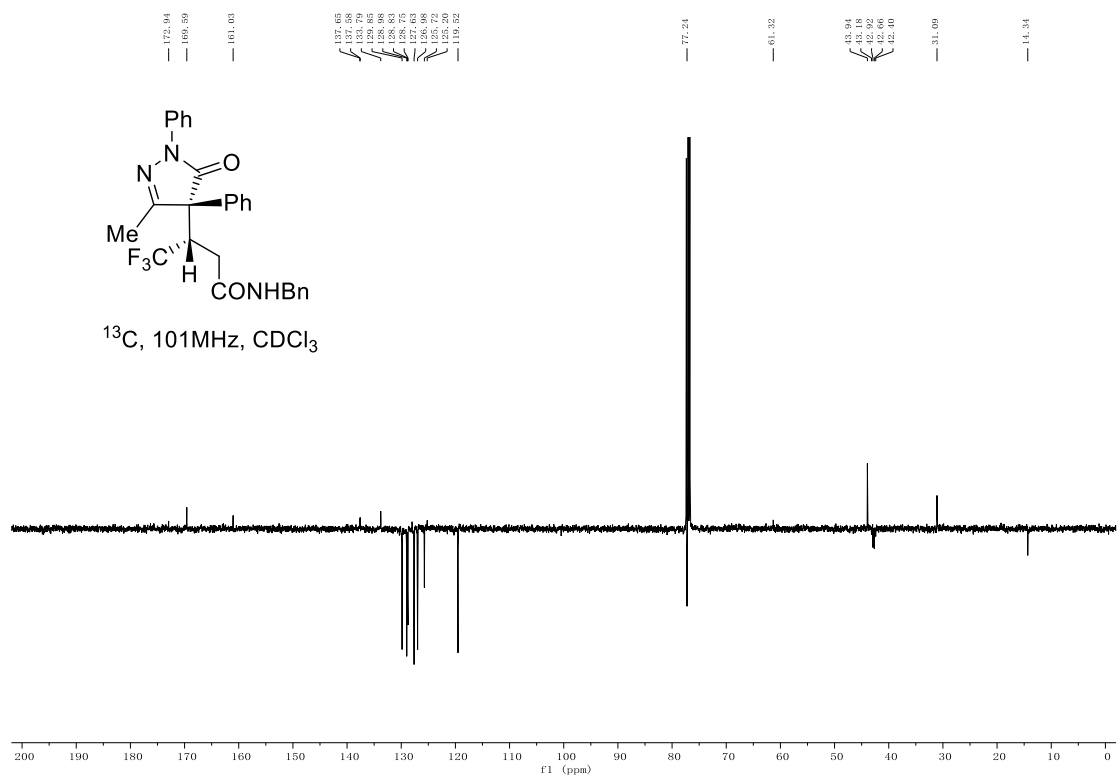

**tert-Butyl (R)-2-oxo-3-phenyl-3-((S)-1,1,1-trifluoro-4-(4-nitrophenoxy)-4-oxobutan-2-yl)indoline-1-carboxylate (13)**

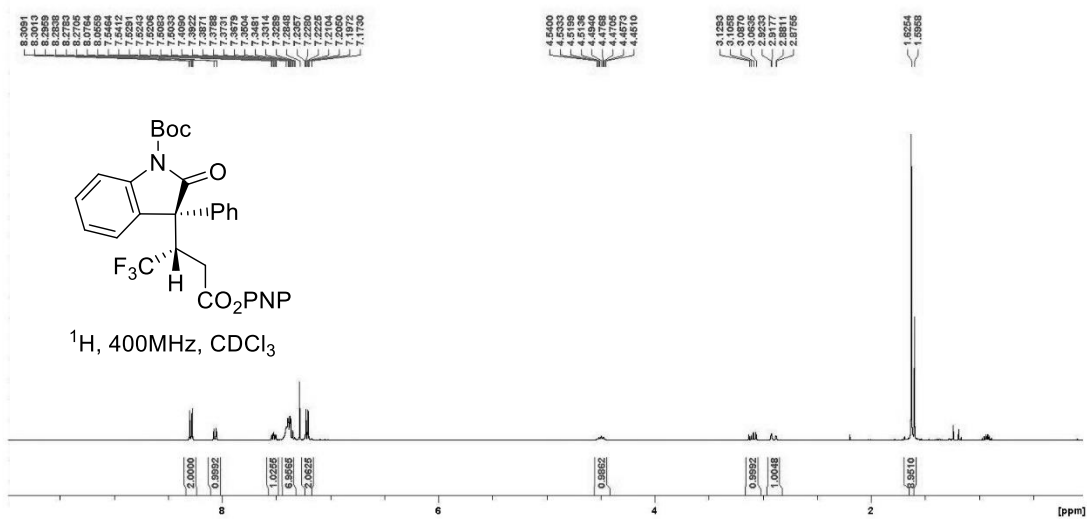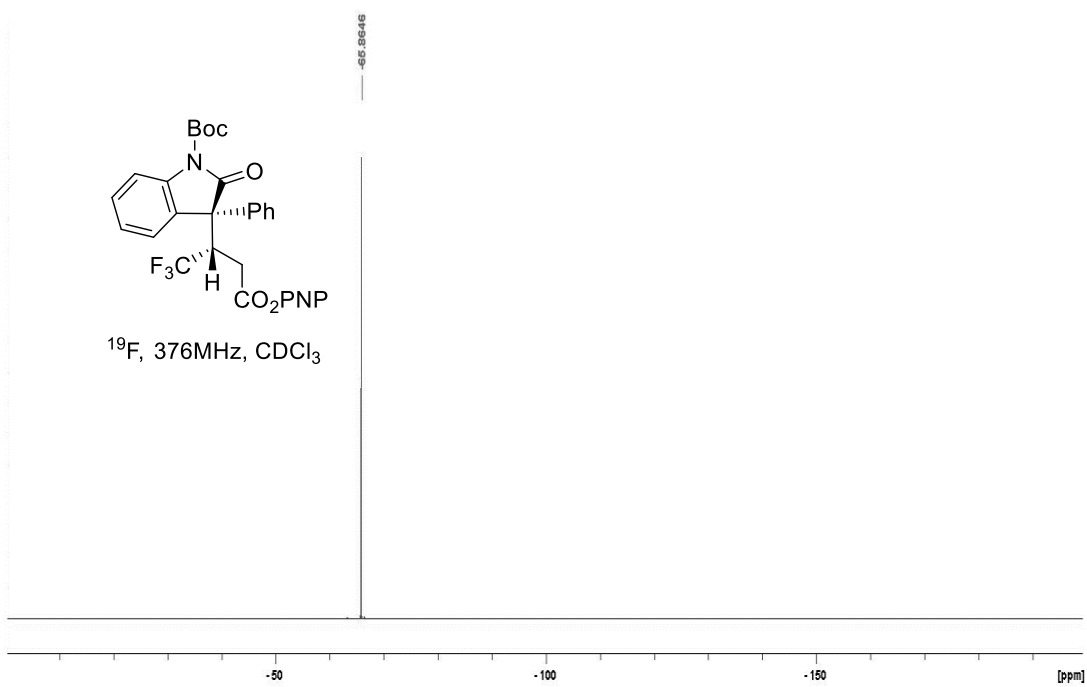

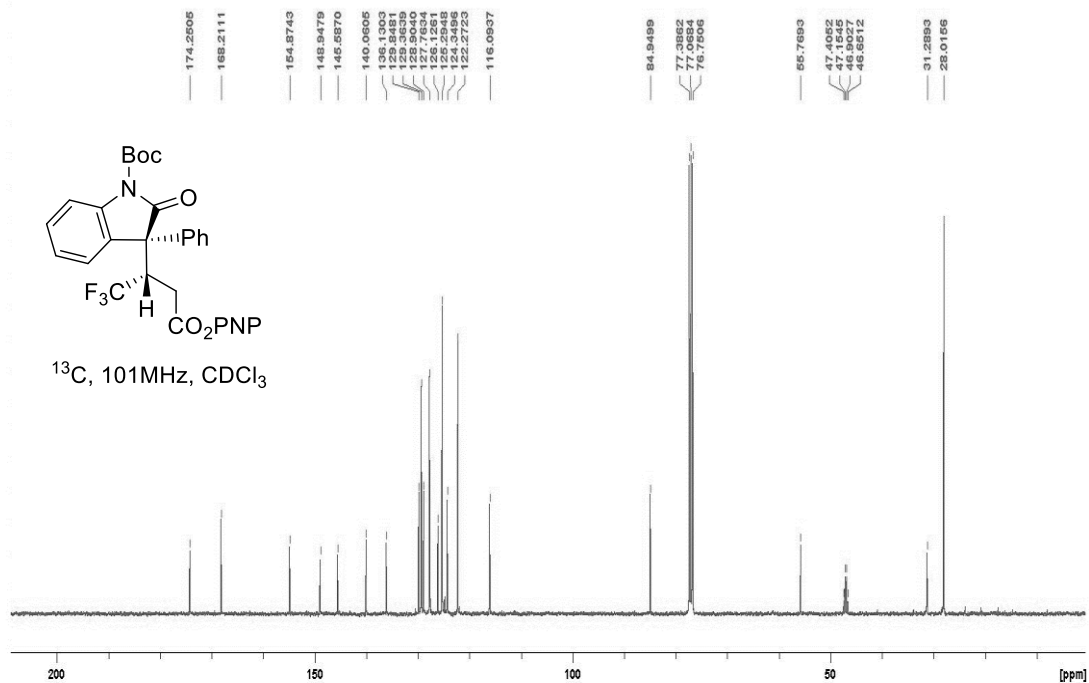

**(S)-N-benzyl-4,4,4-trifluoro-3-((R)-1-methyl-2-oxo-3-phenylindolin-3-yl)butanamide (53)**

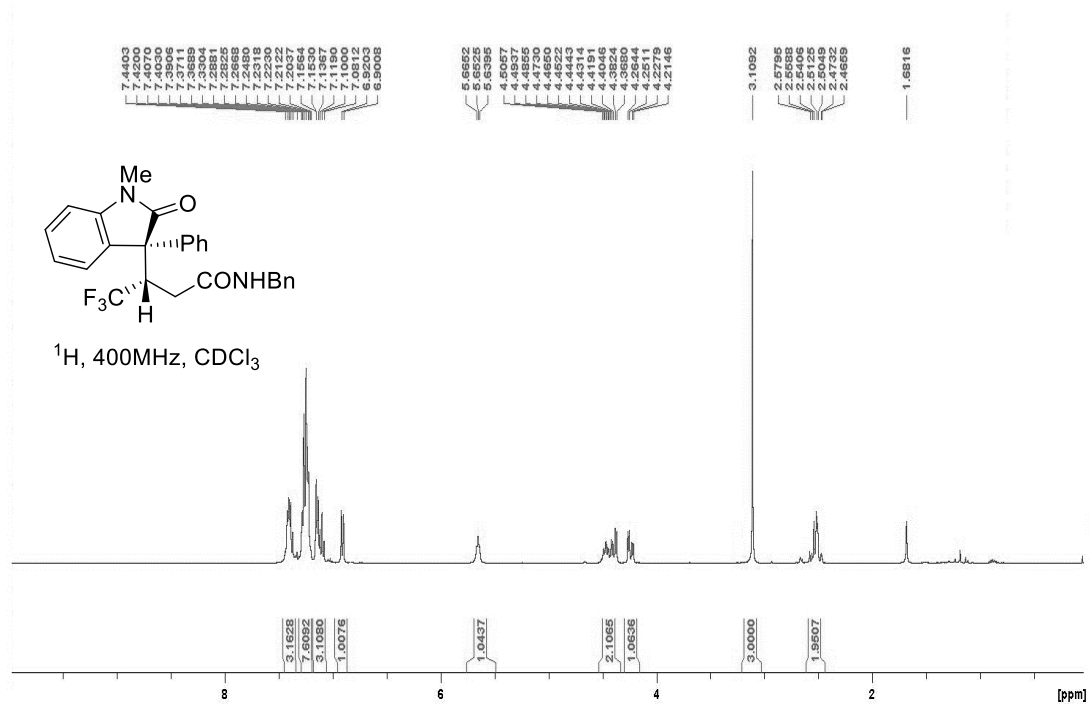

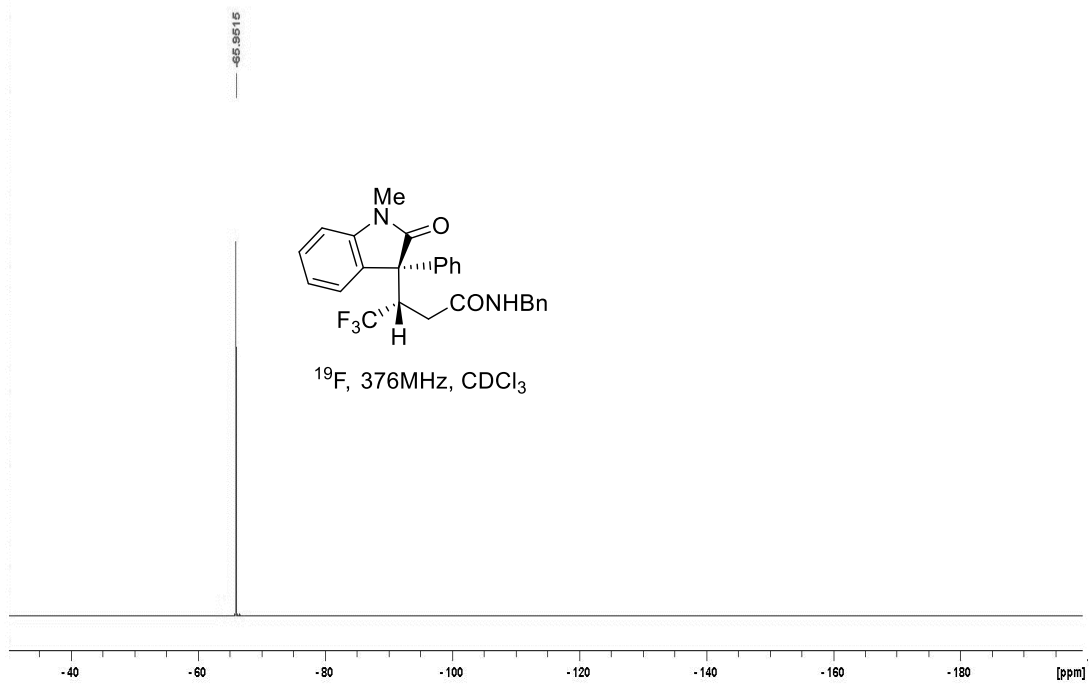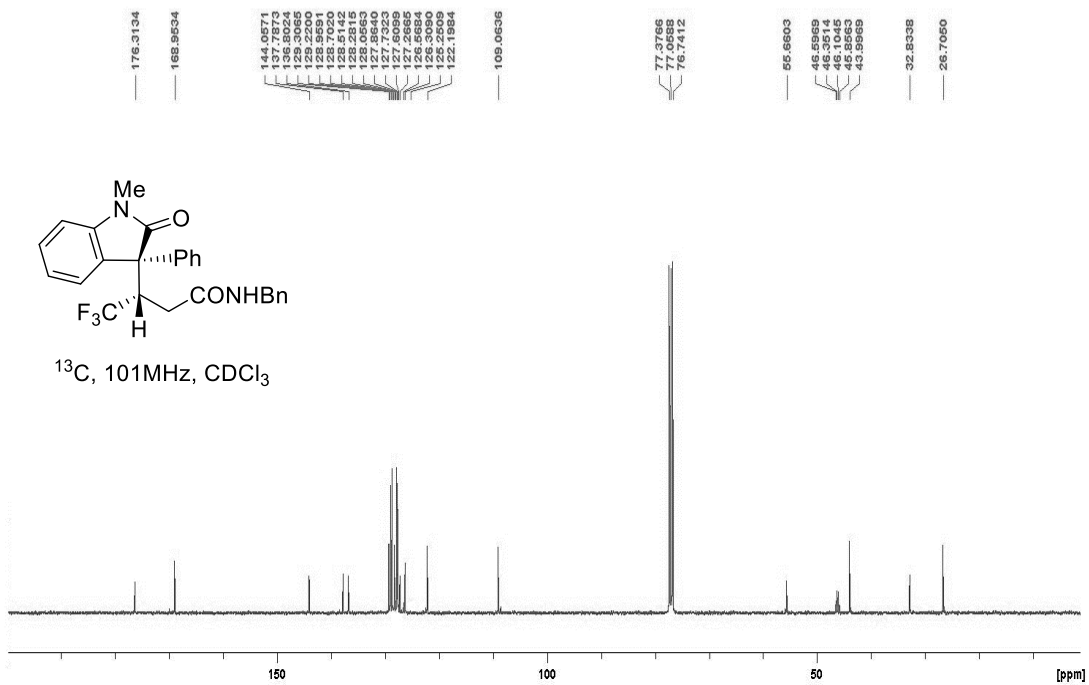

**4-nitrophenyl (S)-3-((R)-1-benzyl-2-oxo-3-phenylindolin-3-yl)-4,4,4-trifluoro-  
Butanoate (54)**

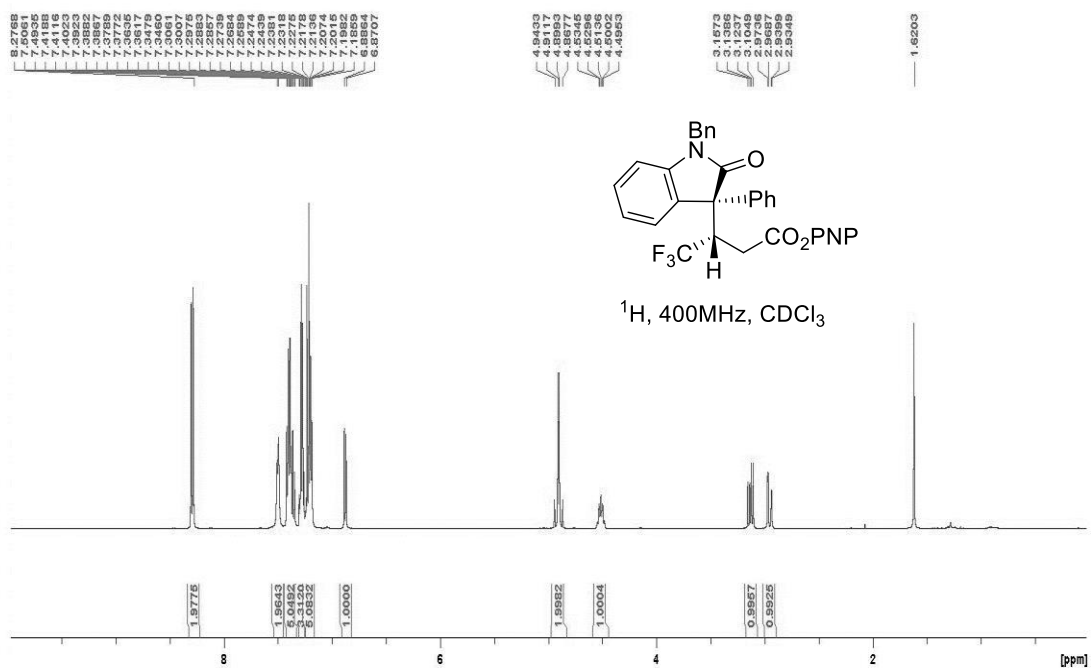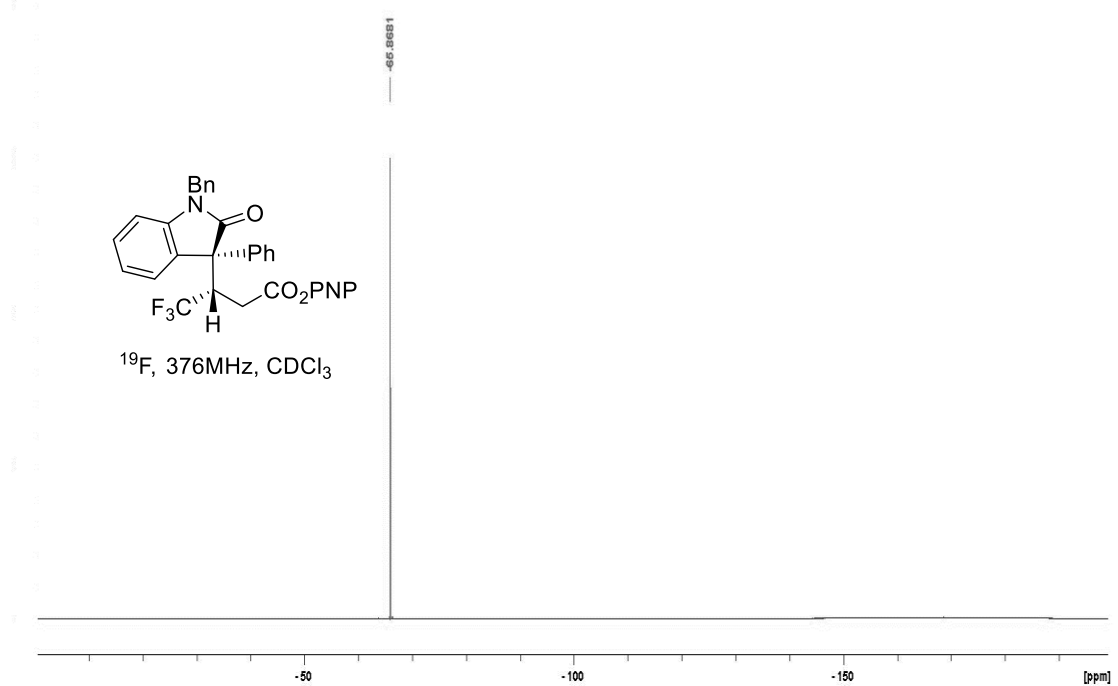

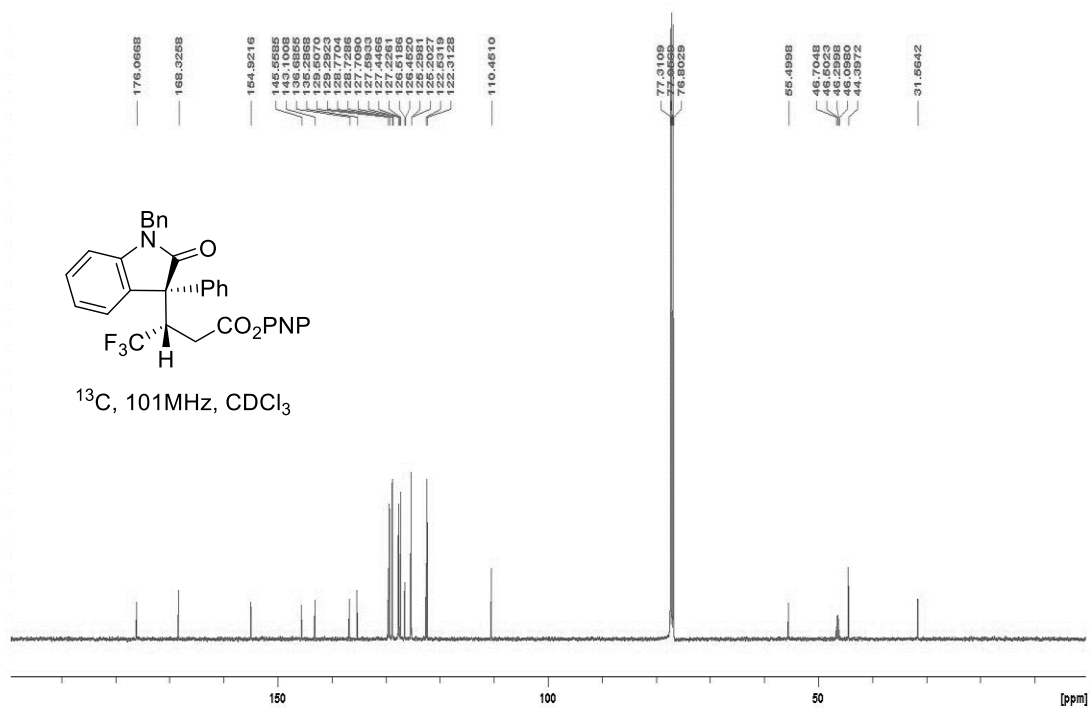

**(S)-N-benzyl-3-((R)-1-benzyl-2-oxo-3-phenylindolin-3-yl)-4,4,4-trifluorobutanamide (55)**

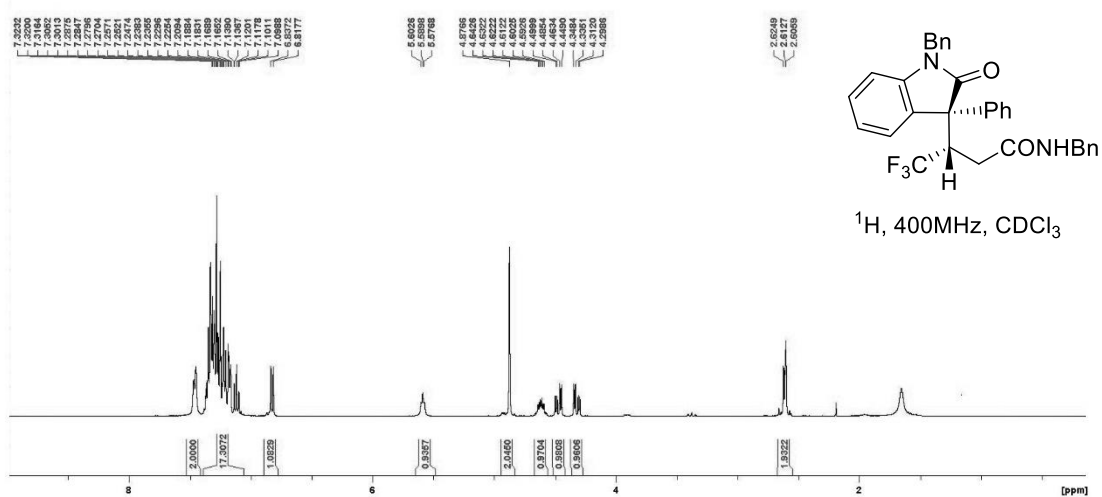

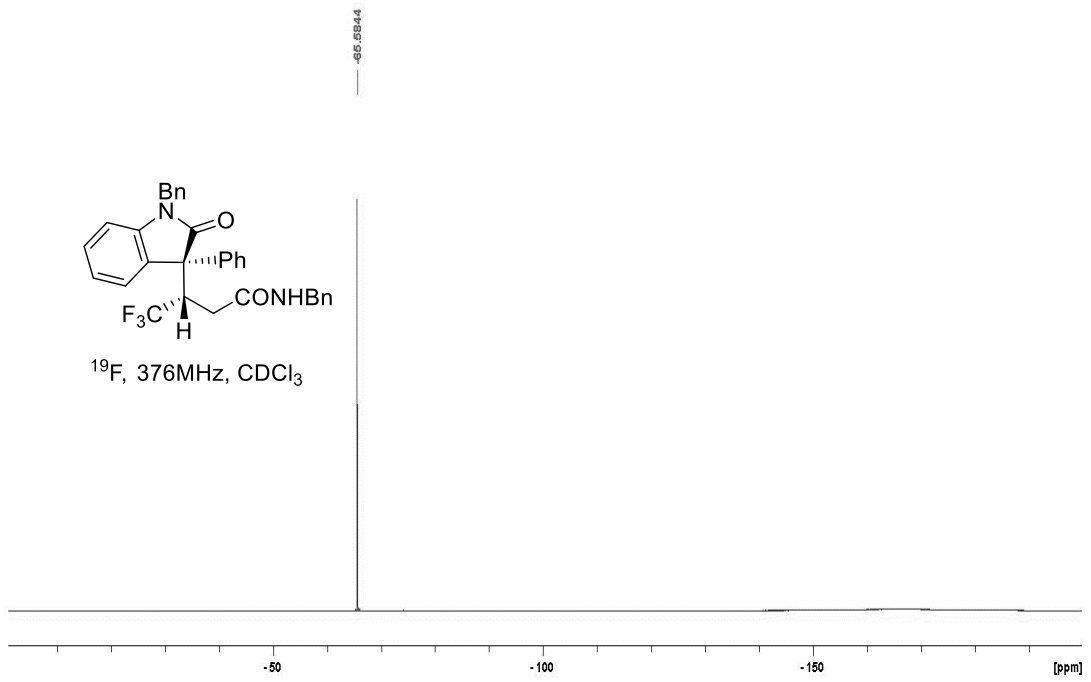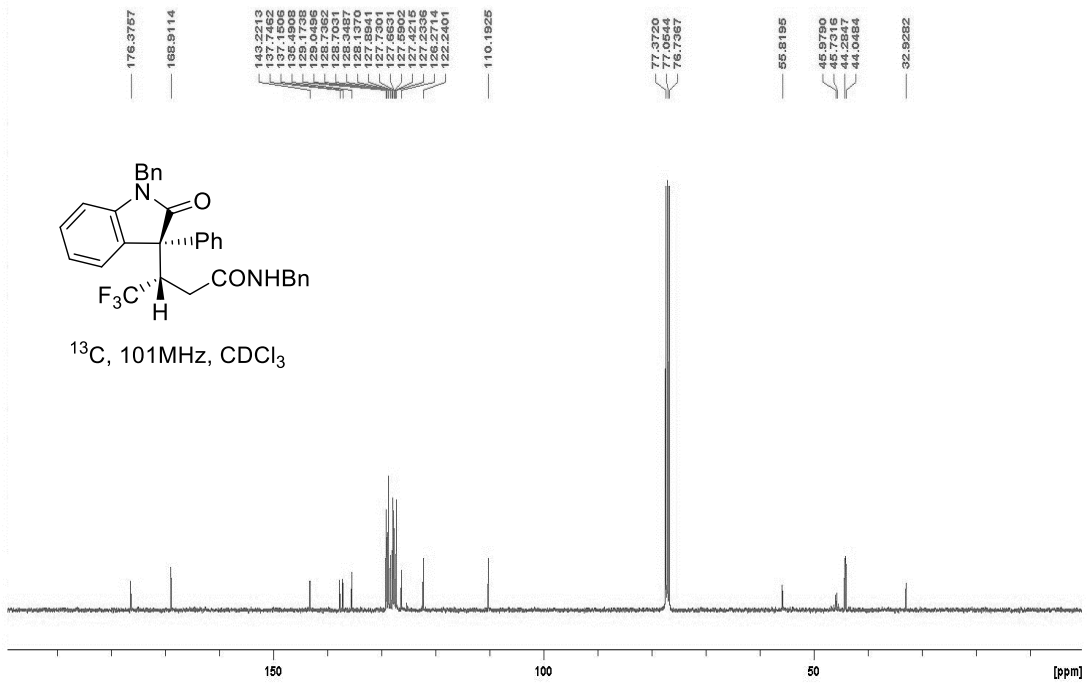



**(R)-1-benzyl-3-phenyl-3-((S)-1,1,1-trifluoro-4-oxo-4-(pyrrolidin-1-yl)butan-2-yl)indolin-2-one (56)**

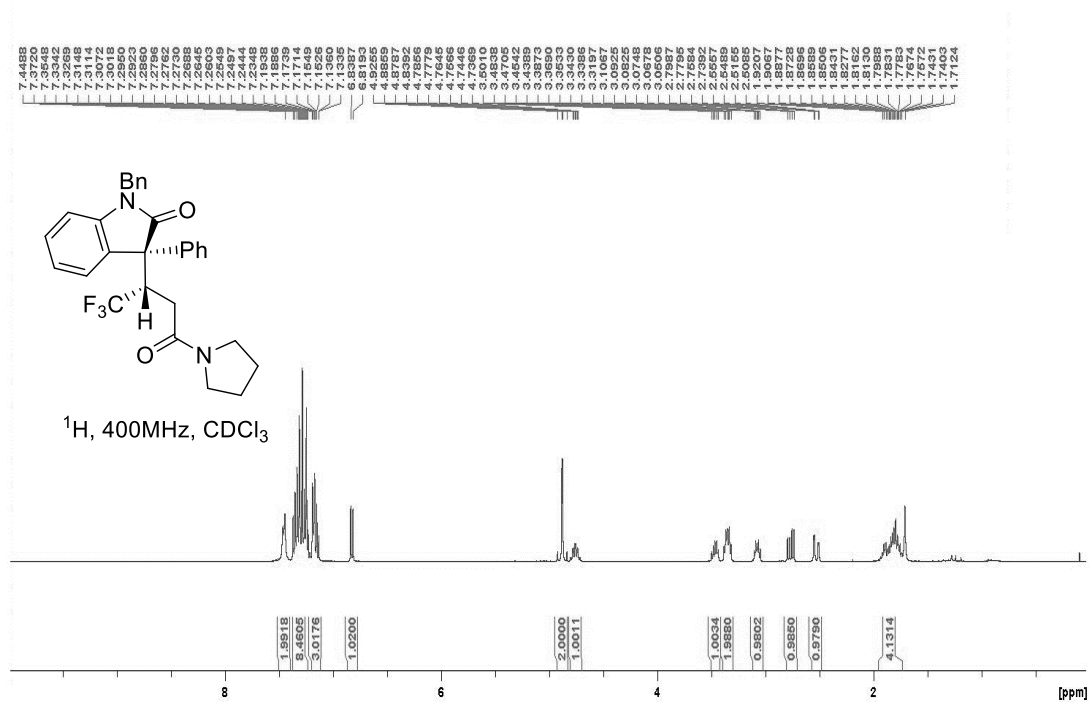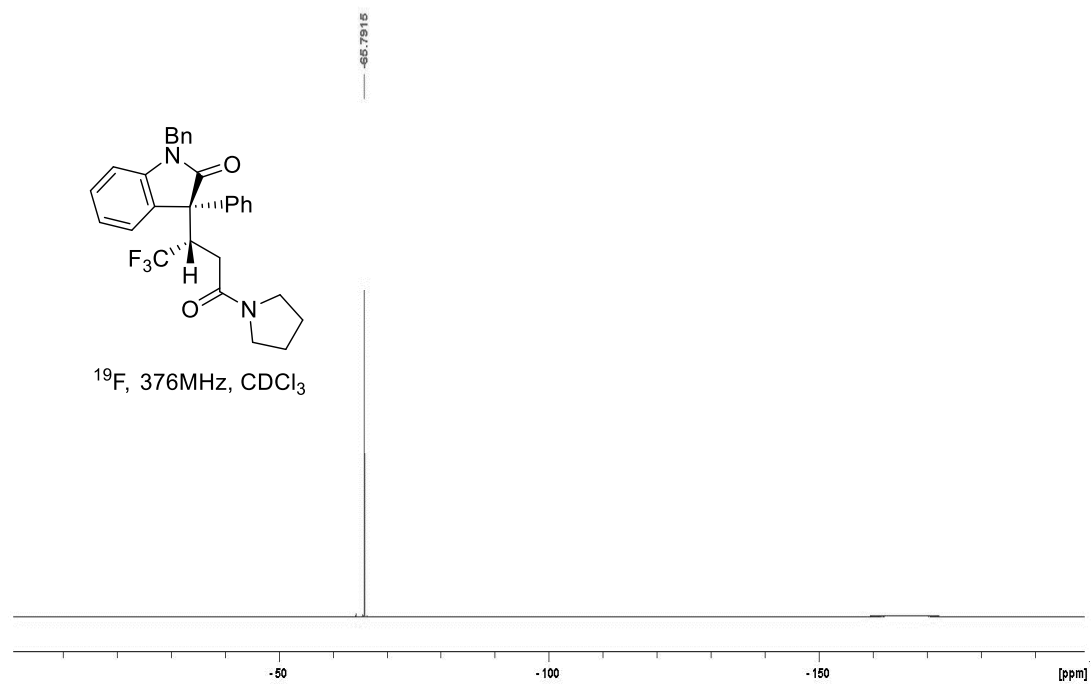

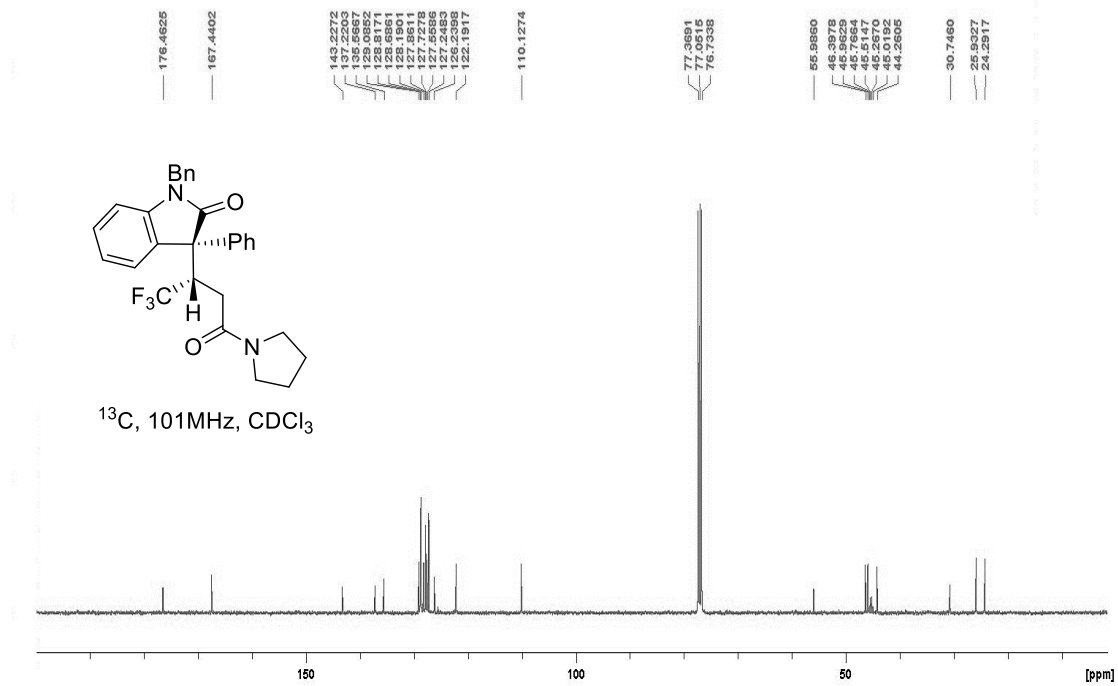

**(R)-1-benzyl-3-phenyl-3-((S)-1,1,1-trifluoro-4-morpholino-4-oxobutan-2-yl)indolin-2-one (57)**

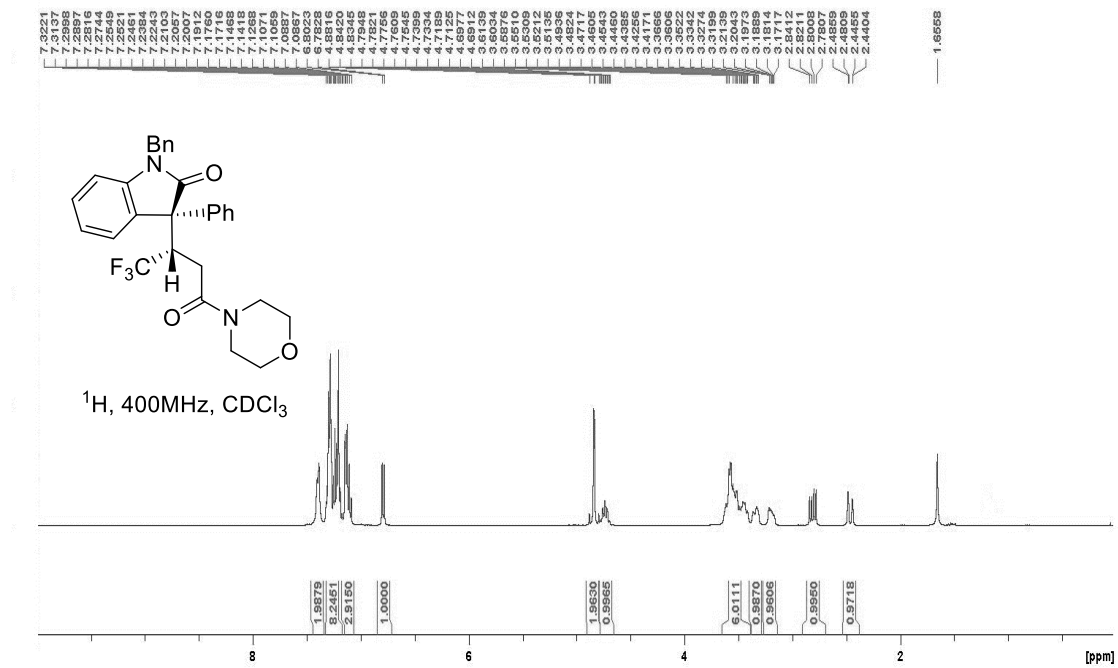

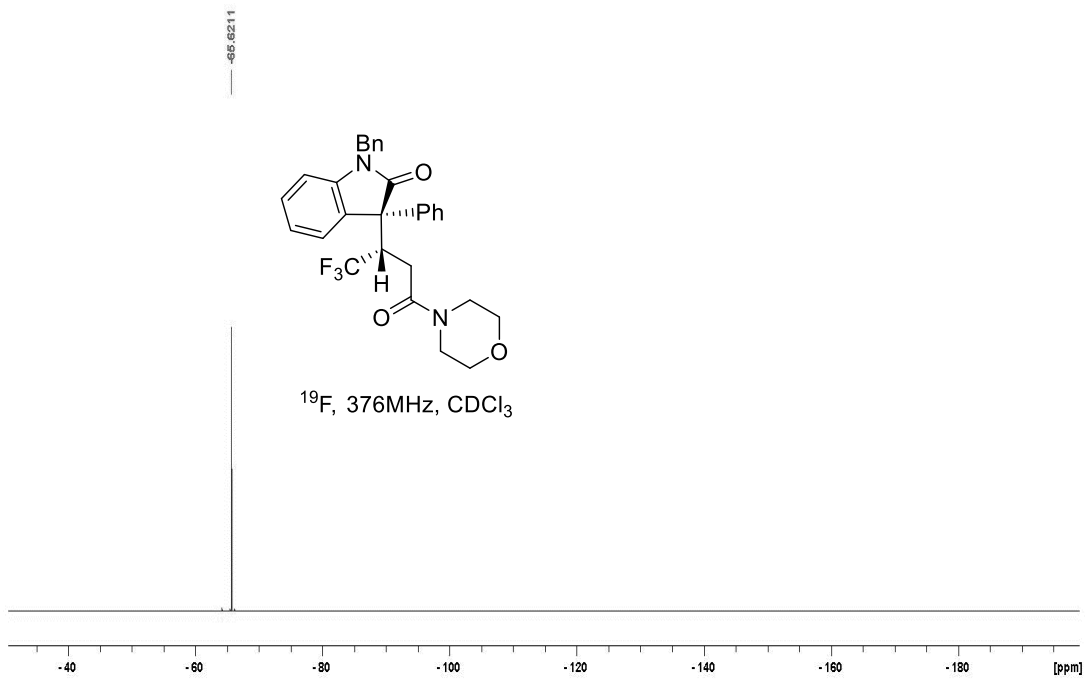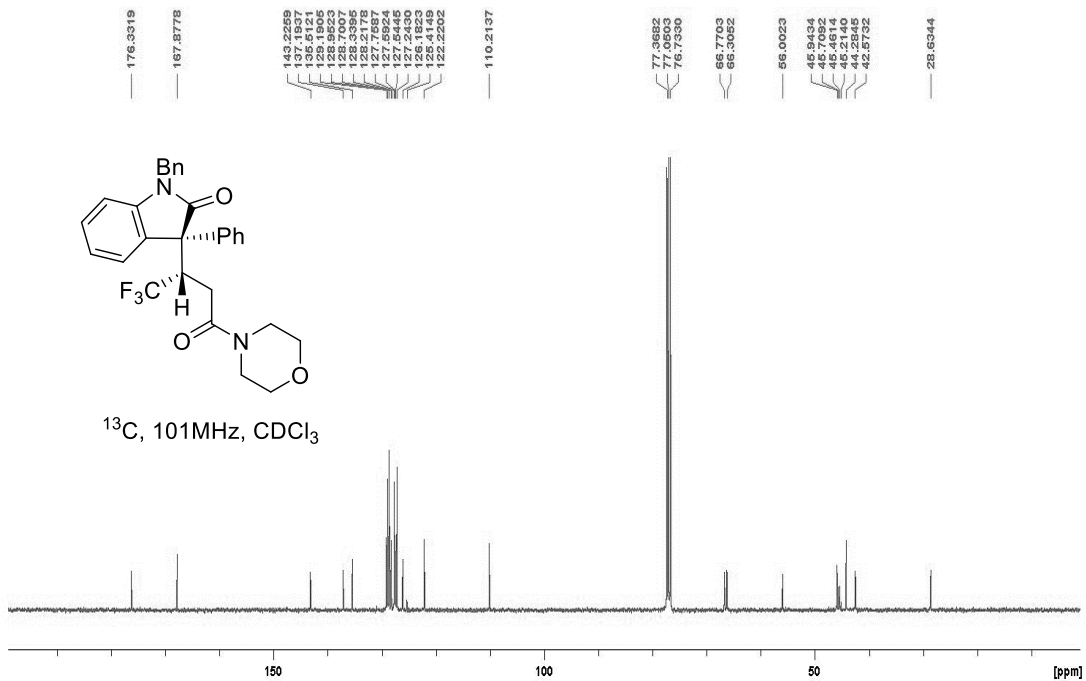

**(S)-N-benzyl-3-((R)-1-benzyl-5-methoxy-2-oxo-3-phenylindolin-3-yl)-4,4,4-trifluorobutanamide (58)**

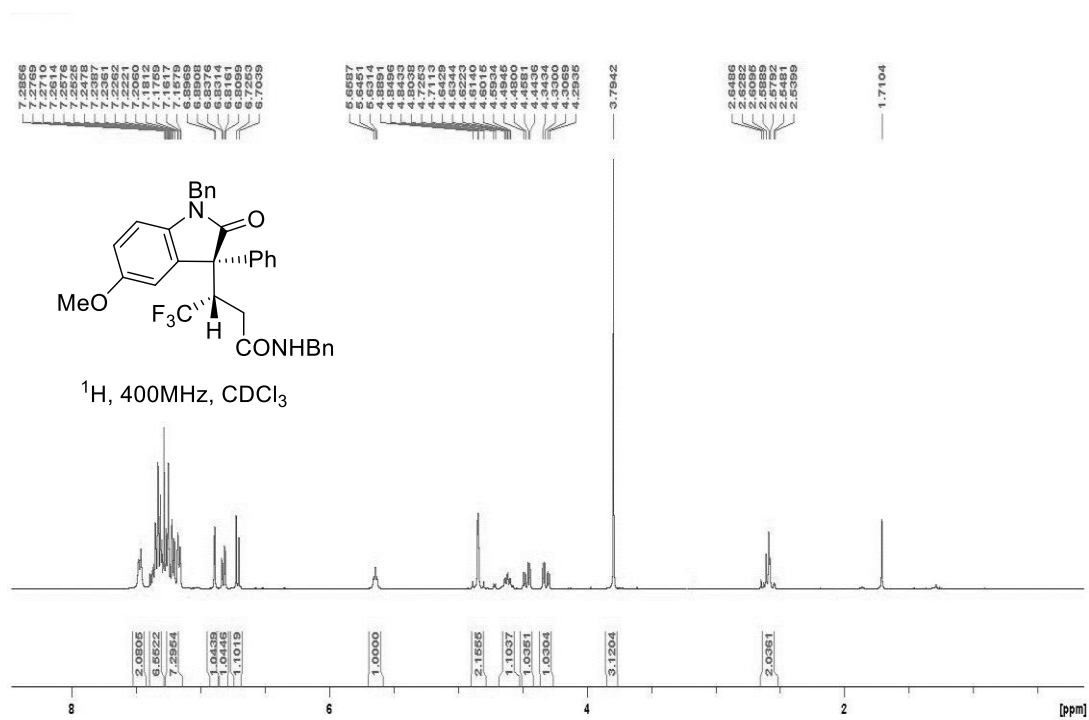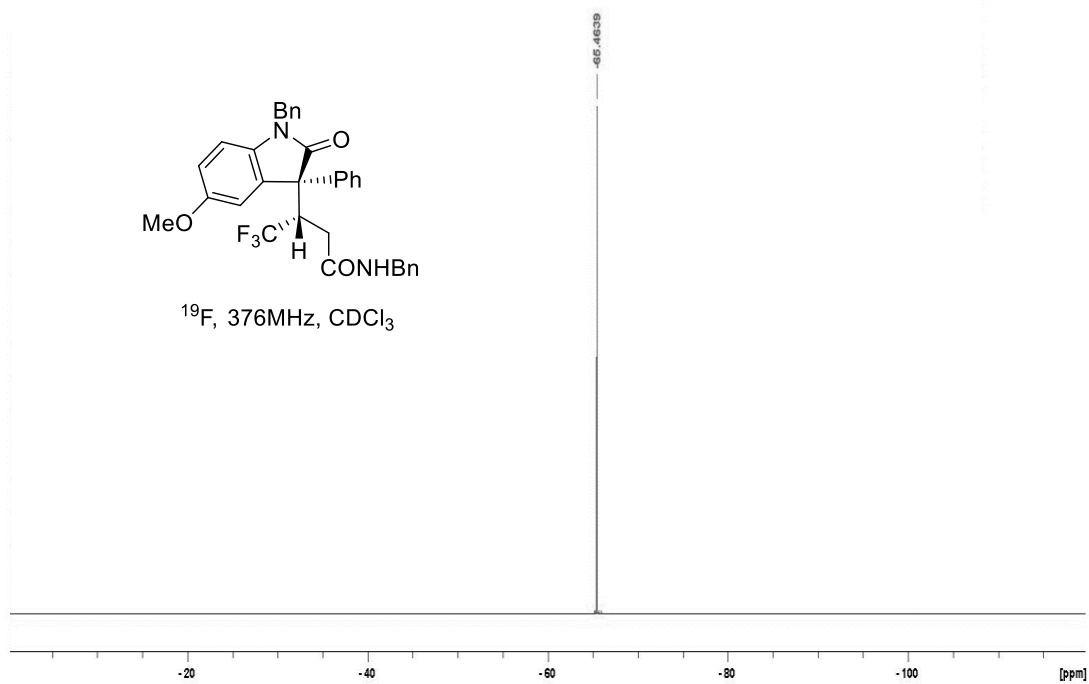



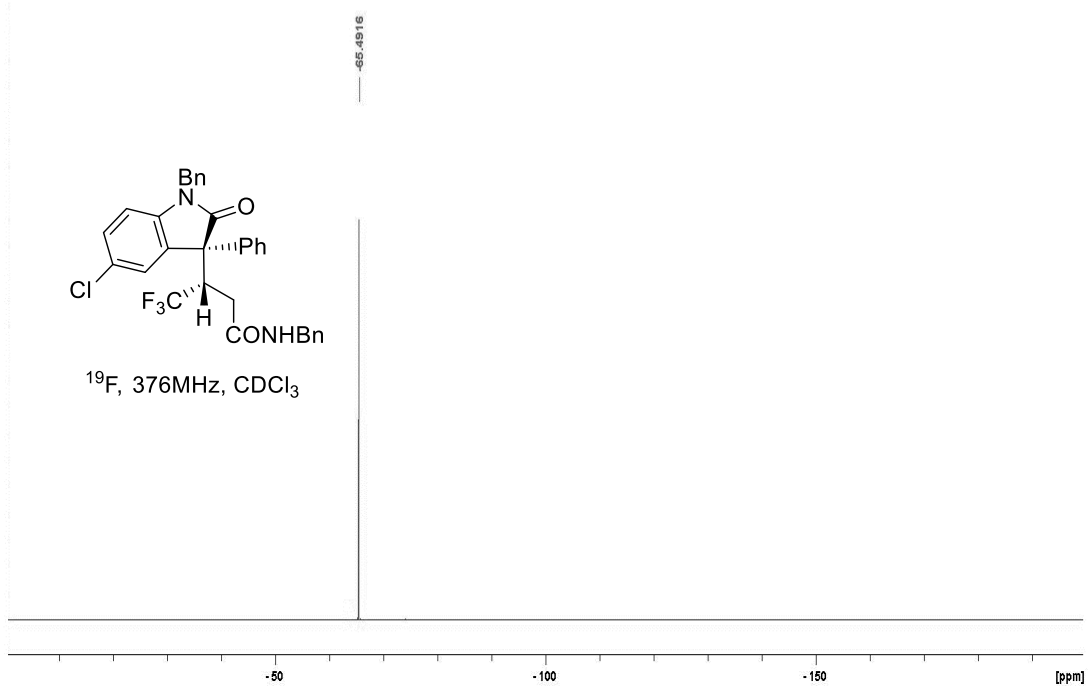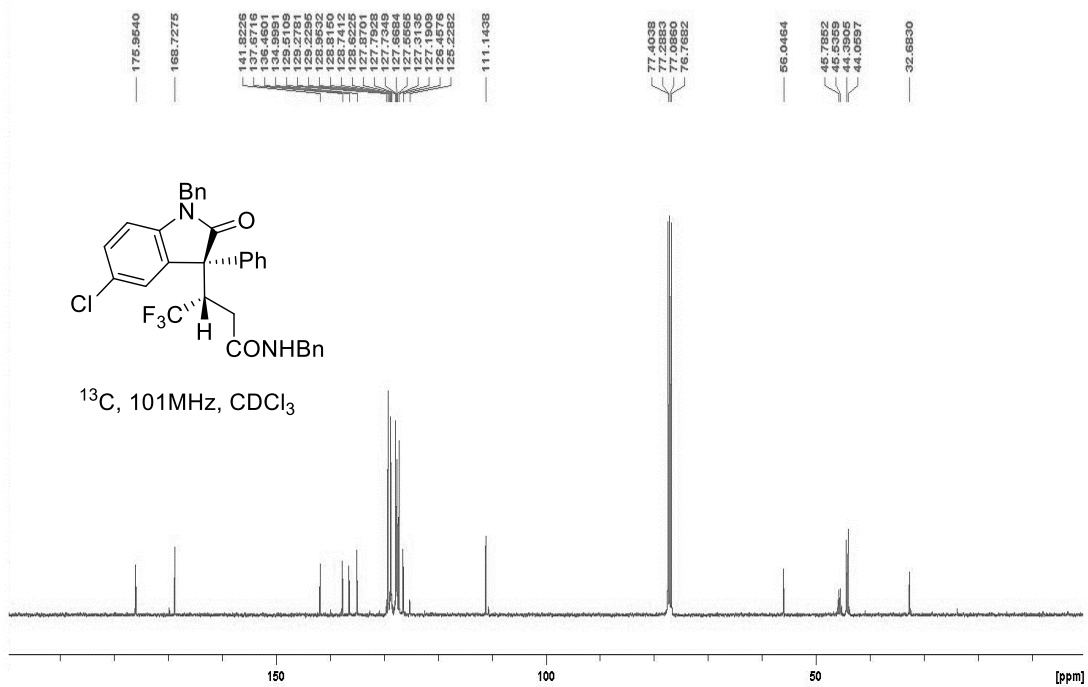

**(S)-N-benzyl-3-((R)-1-benzyl-6-chloro-2-oxo-3-phenylindolin-3-yl)-4,4,4-trifluorobutanamide (60)**

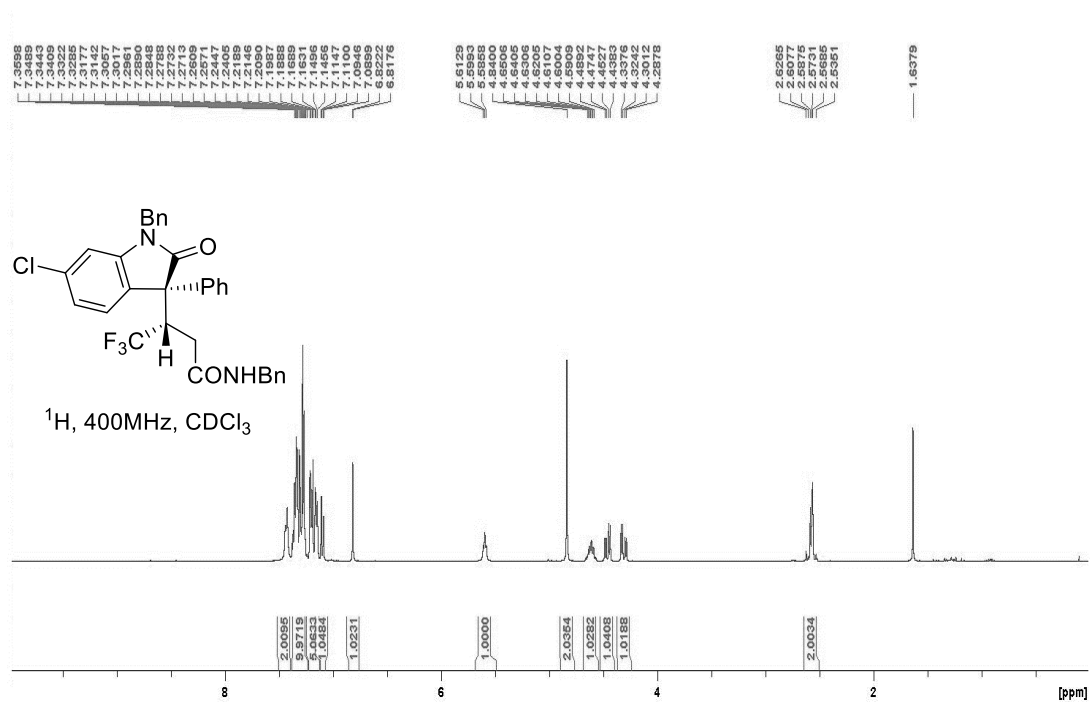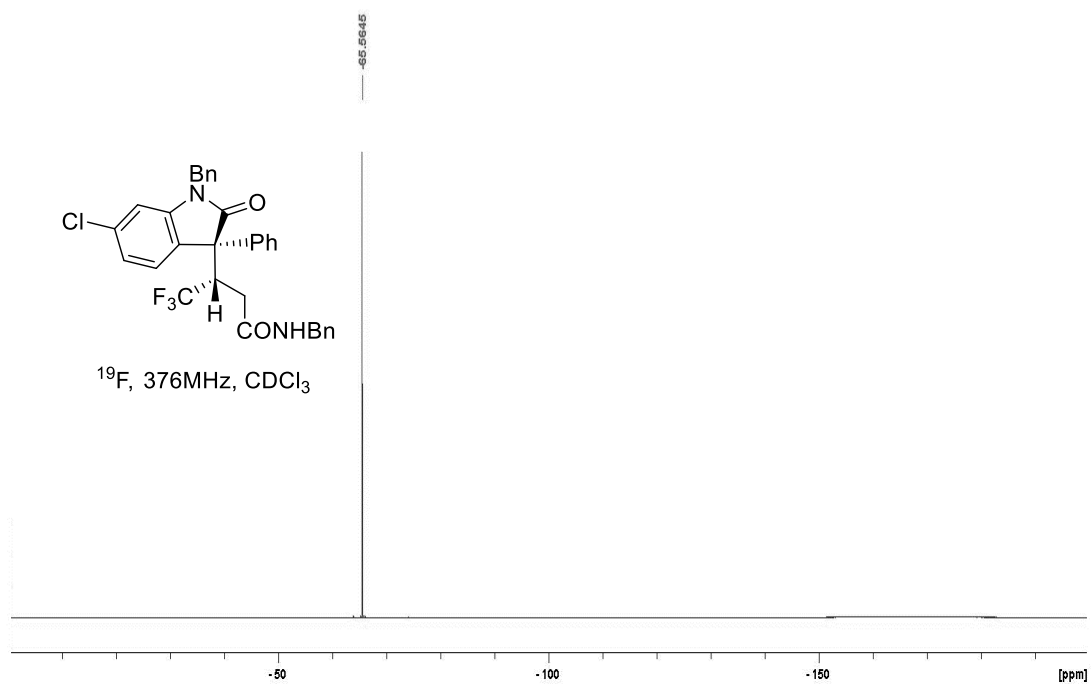





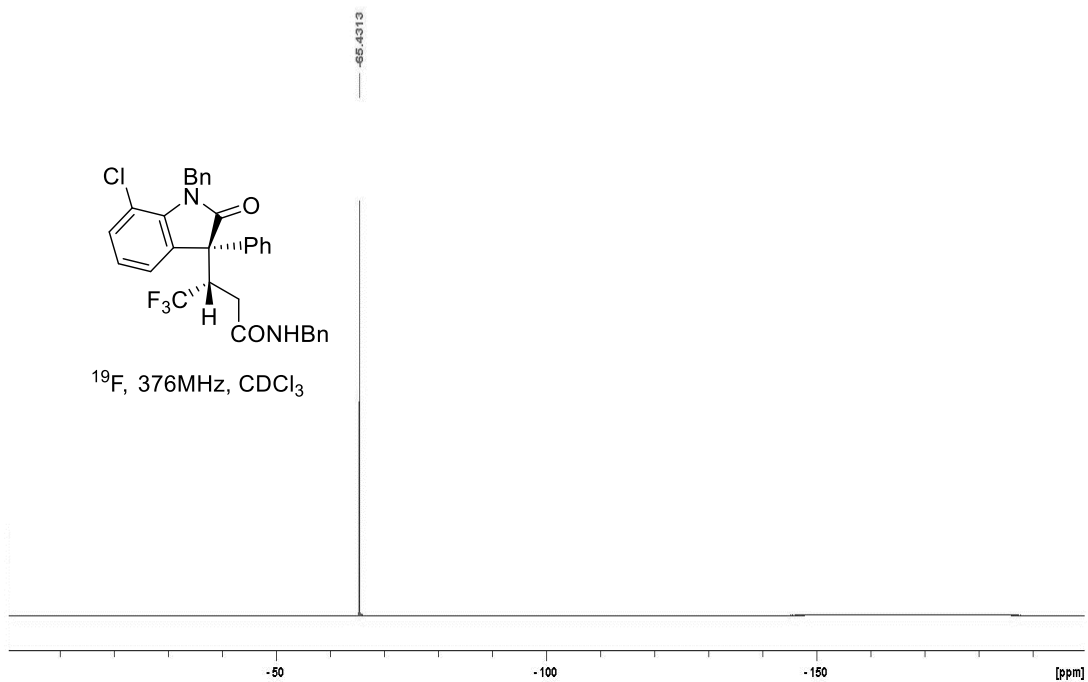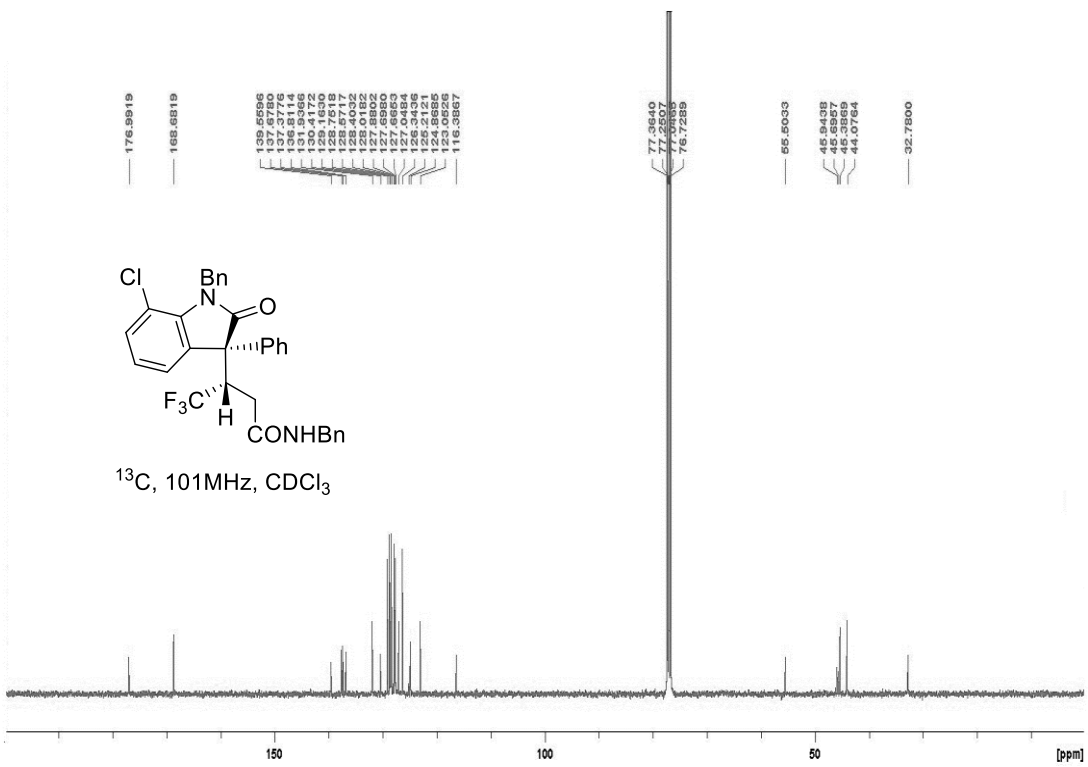

**(S)-N-benzyl-3-((R)-1-benzyl-3-(4-methoxyphenyl)-2-oxindolin-3-yl)-4,4,4-trifluorobutanamide (62)**

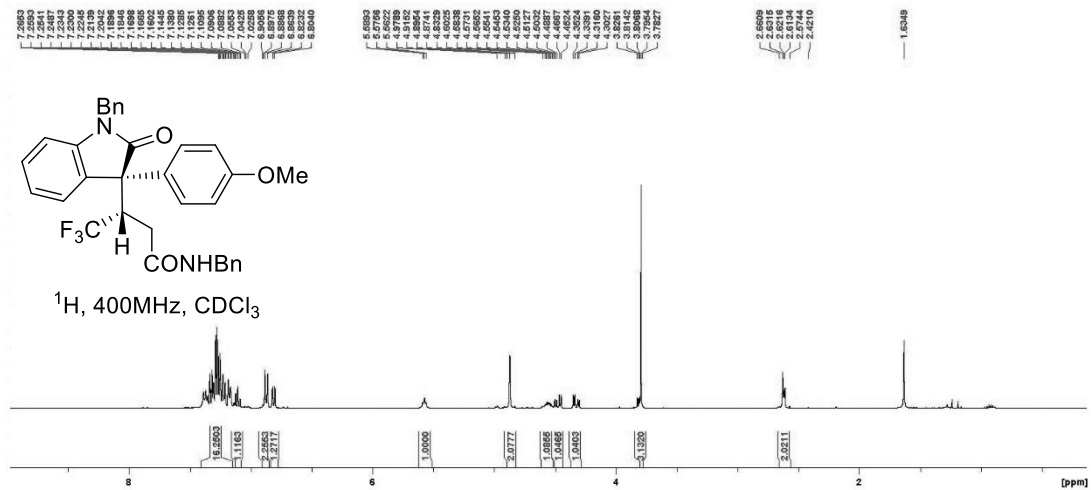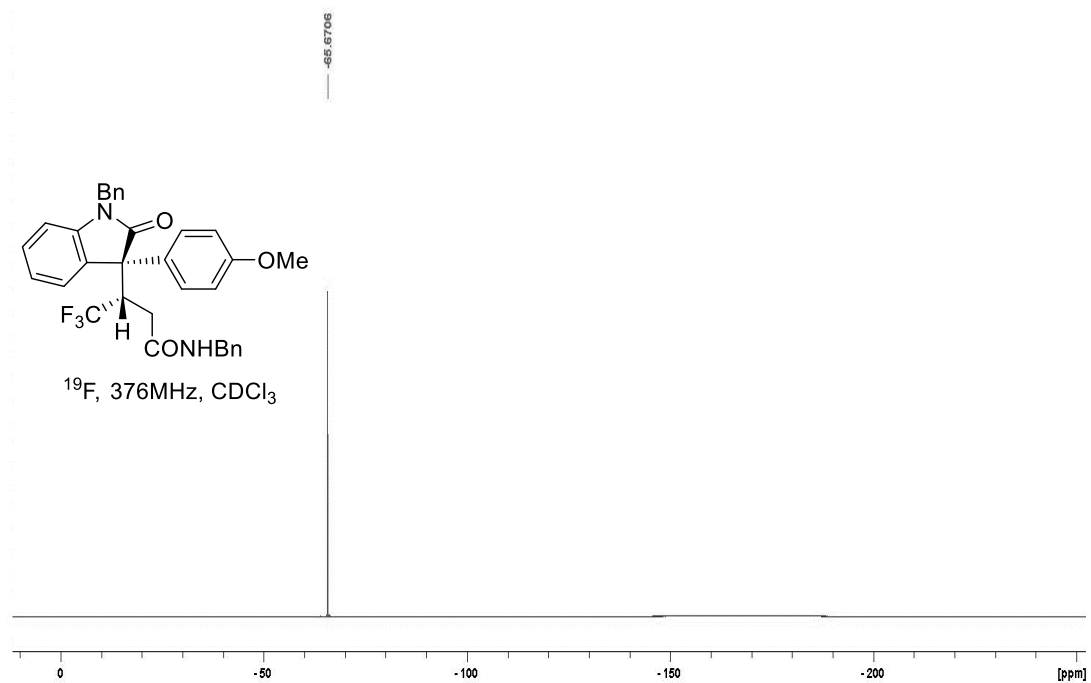

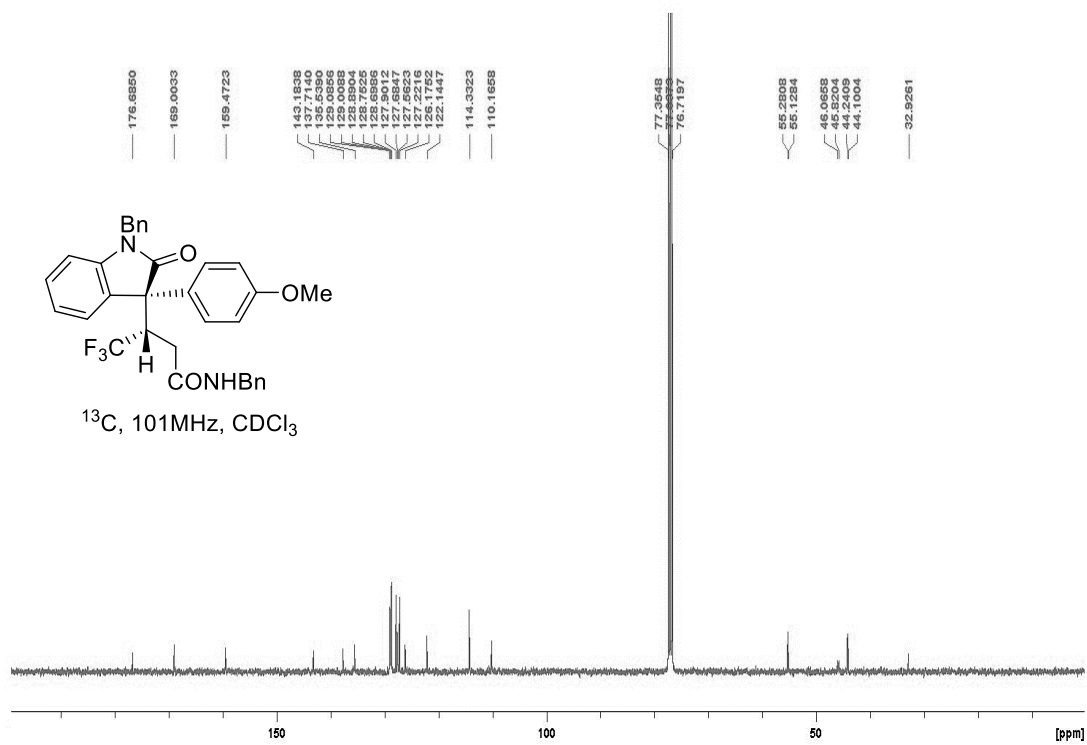

**(S)-3-((R)-3-(benzo[d][1,3]dioxol-5-yl)-1-benzyl-2-oxindolin-3-yl)-N-benzyl-4,4,4-trifluorobutanamide (63)**

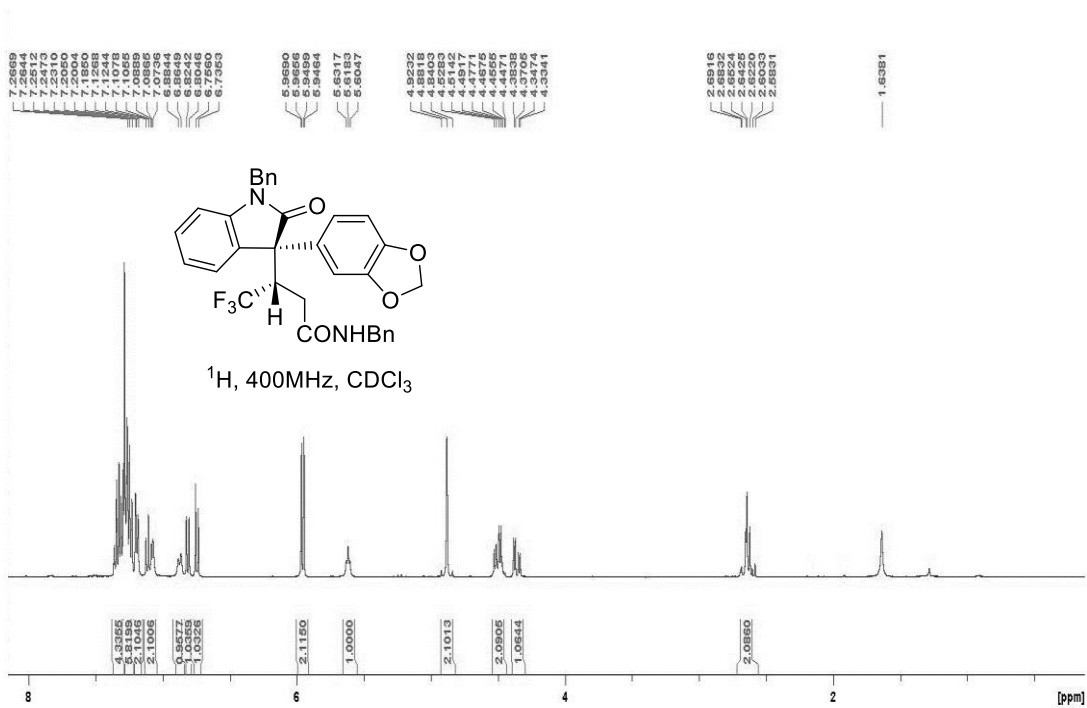

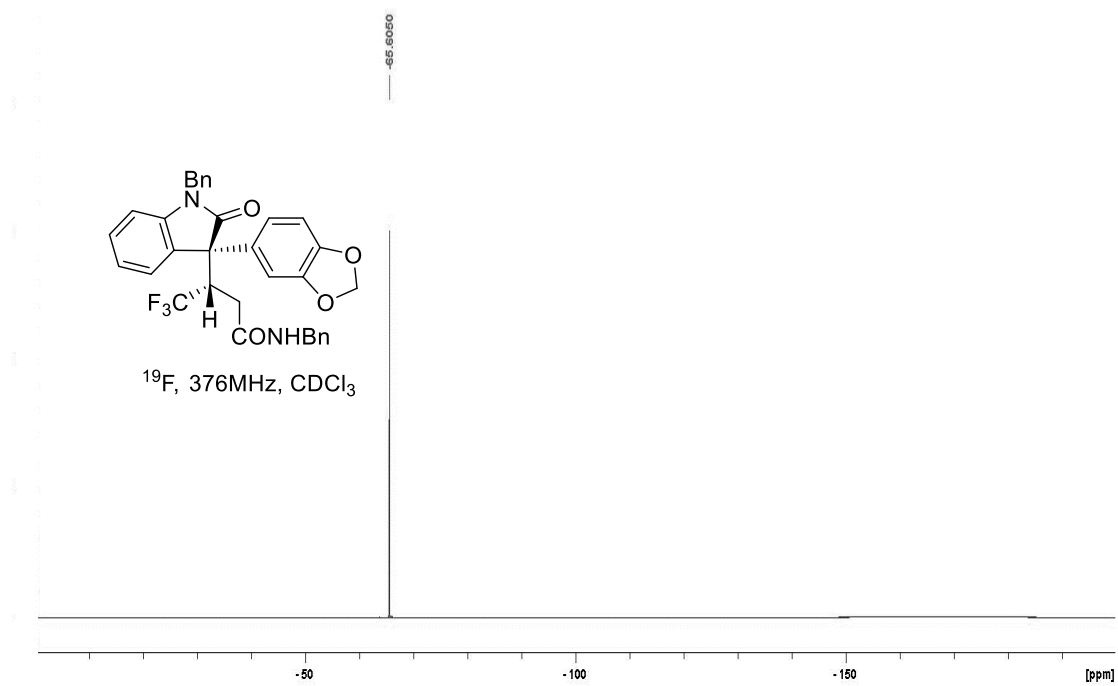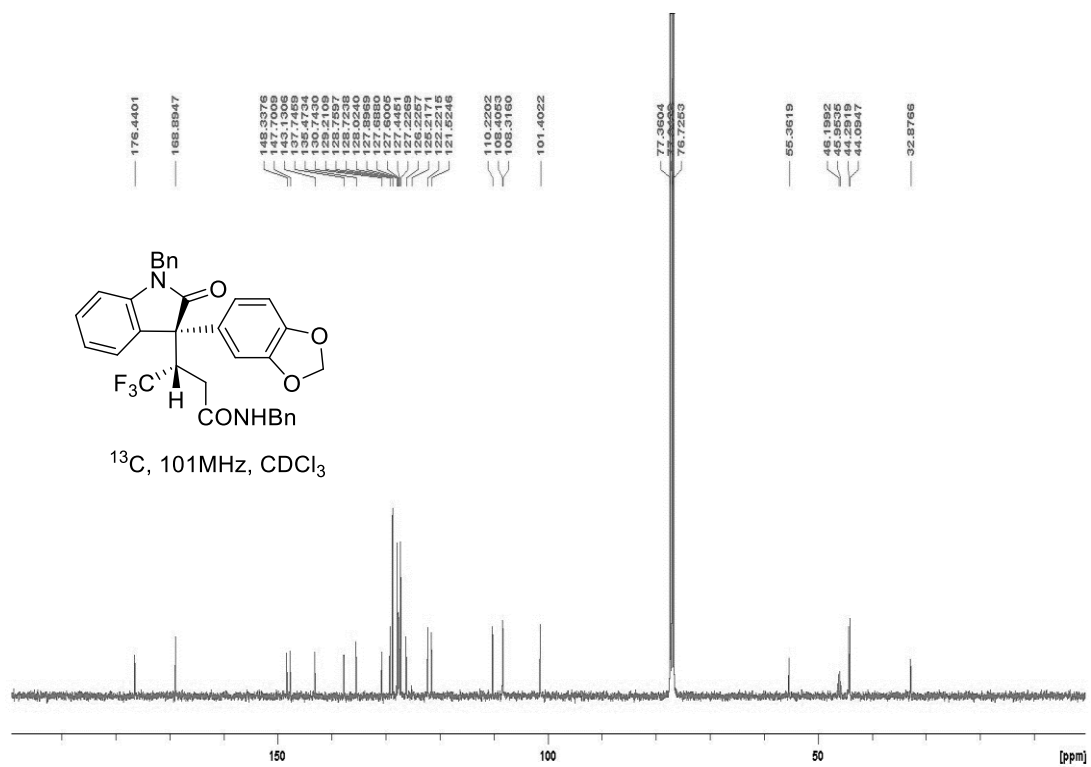

**(S)-N-benzyl-3-((R)-1-benzyl-3-(naphthalen-2-yl)-2-oxindolin-3-yl)-4,4,4-trifluorobutanamide (64)**

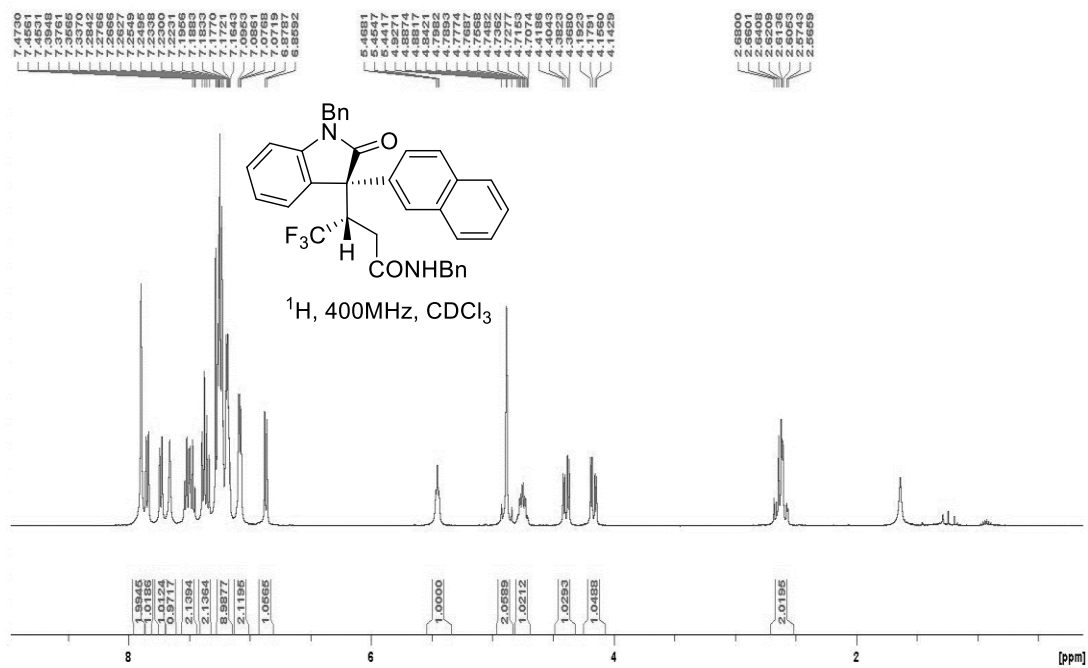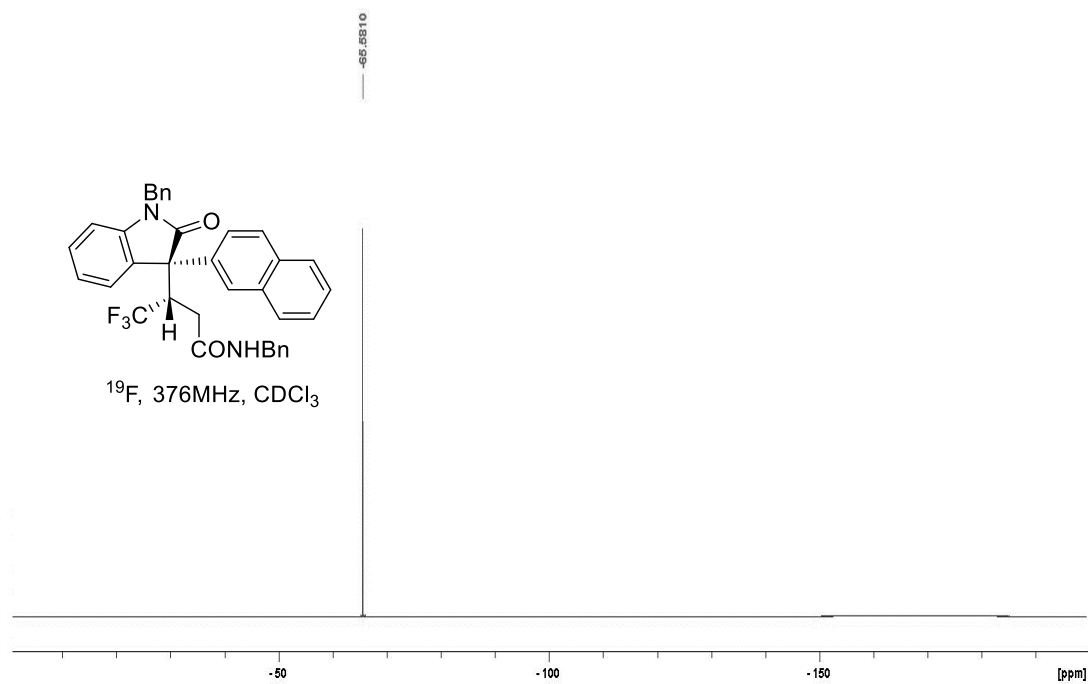

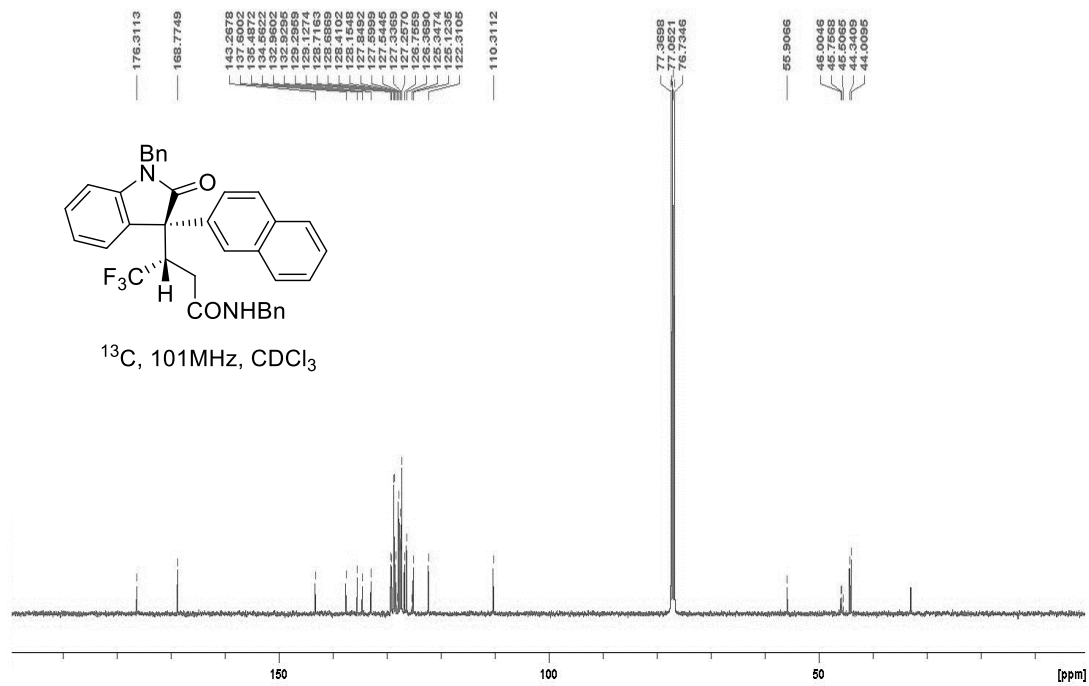

**(S)-N-benzyl-3-((R)-1-benzyl-2-oxo-3-(4-(trifluoromethyl)phenyl)indolin-3-yl)-4,4,4-trifluorobutanamide (65)**

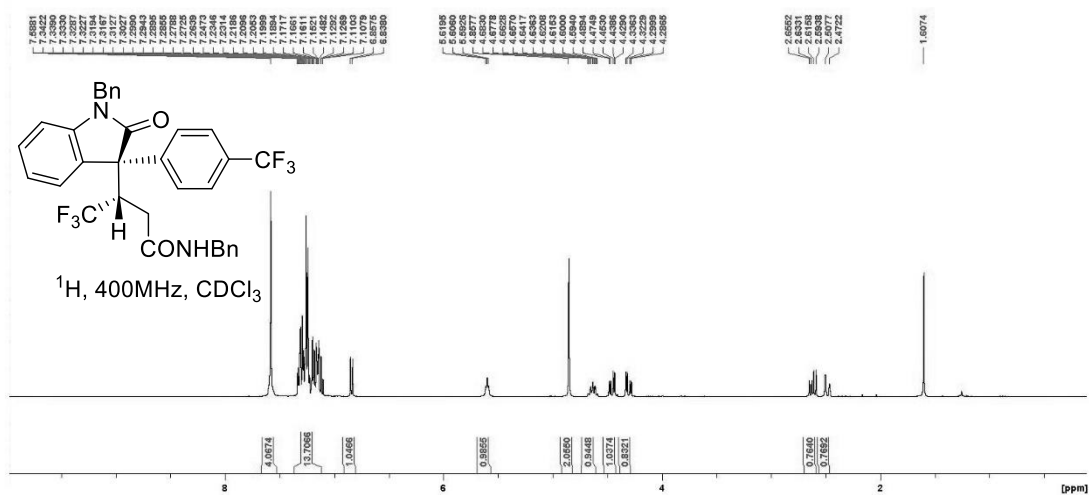

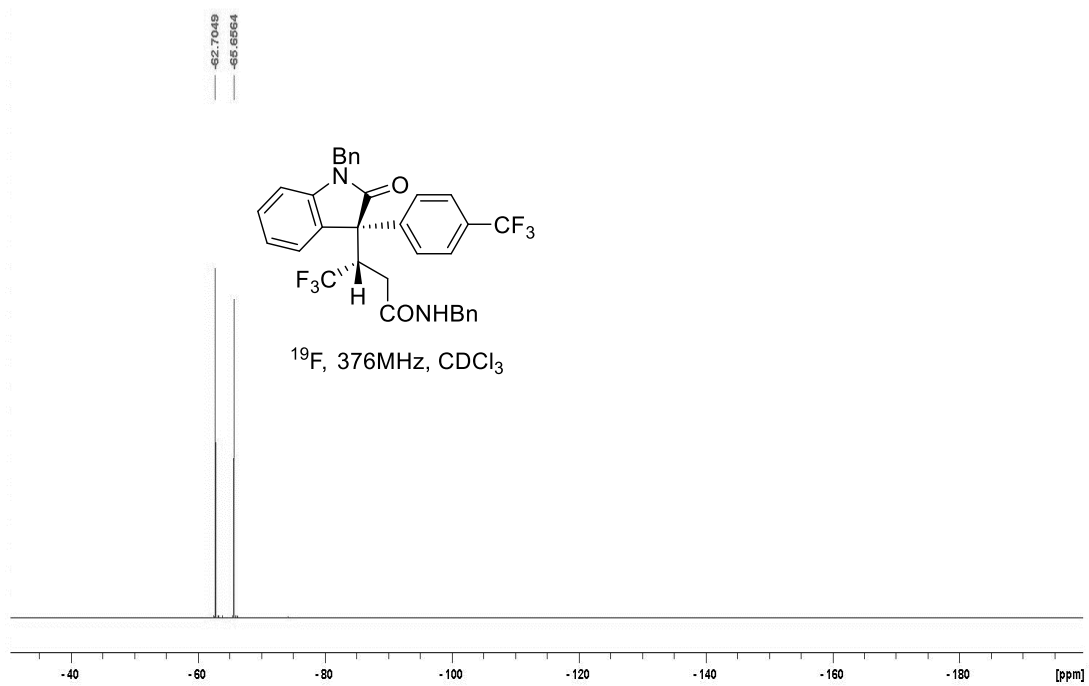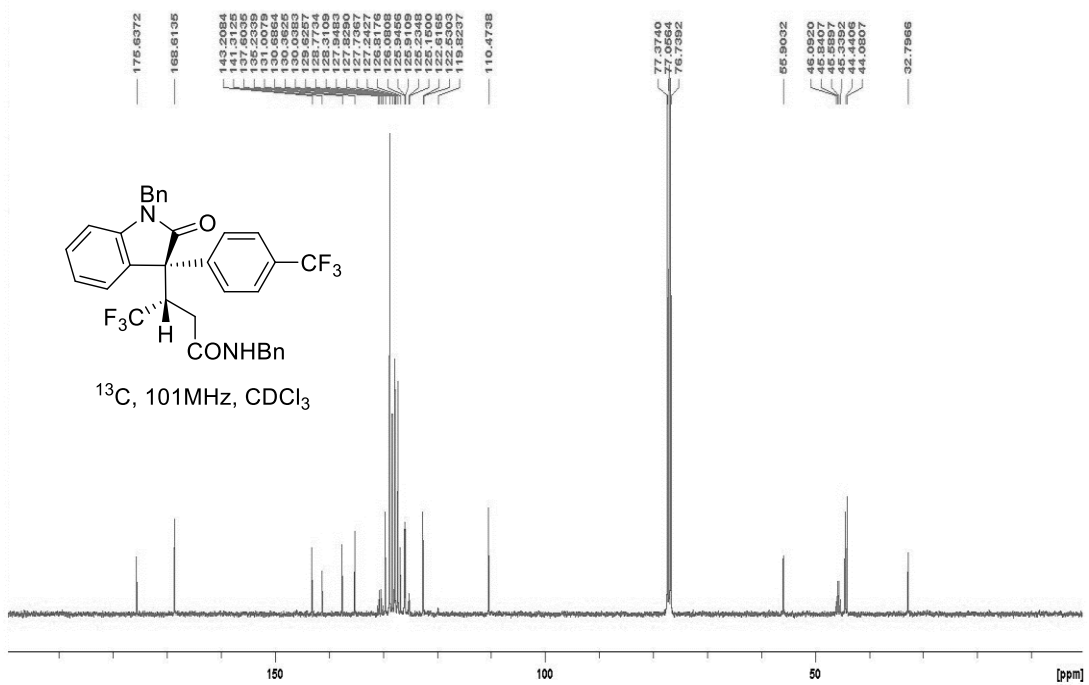

**(S)-N-benzyl-3-((R)-1-benzyl-3-(4-fluorophenyl)-2-oxindolin-3-yl)-4,4,4-trifluorobutanamide (66)**

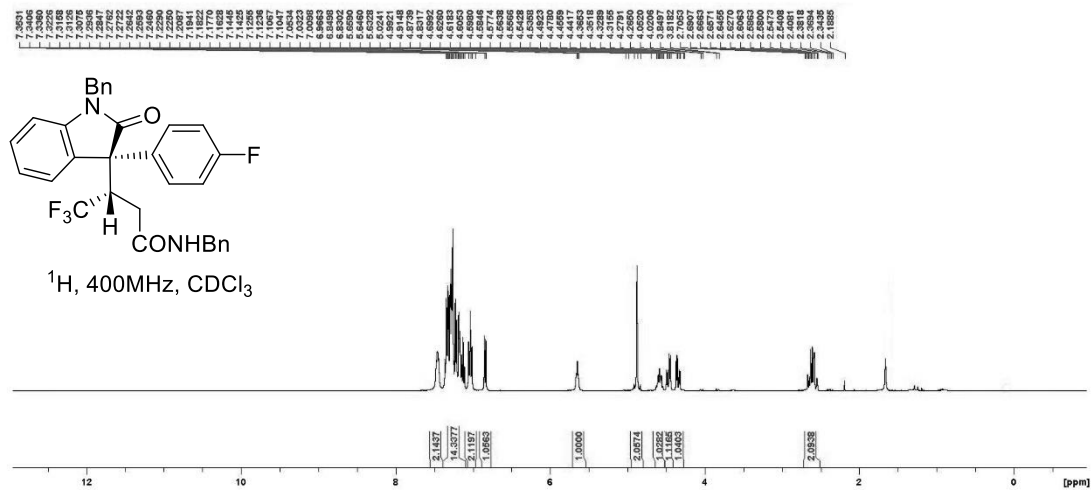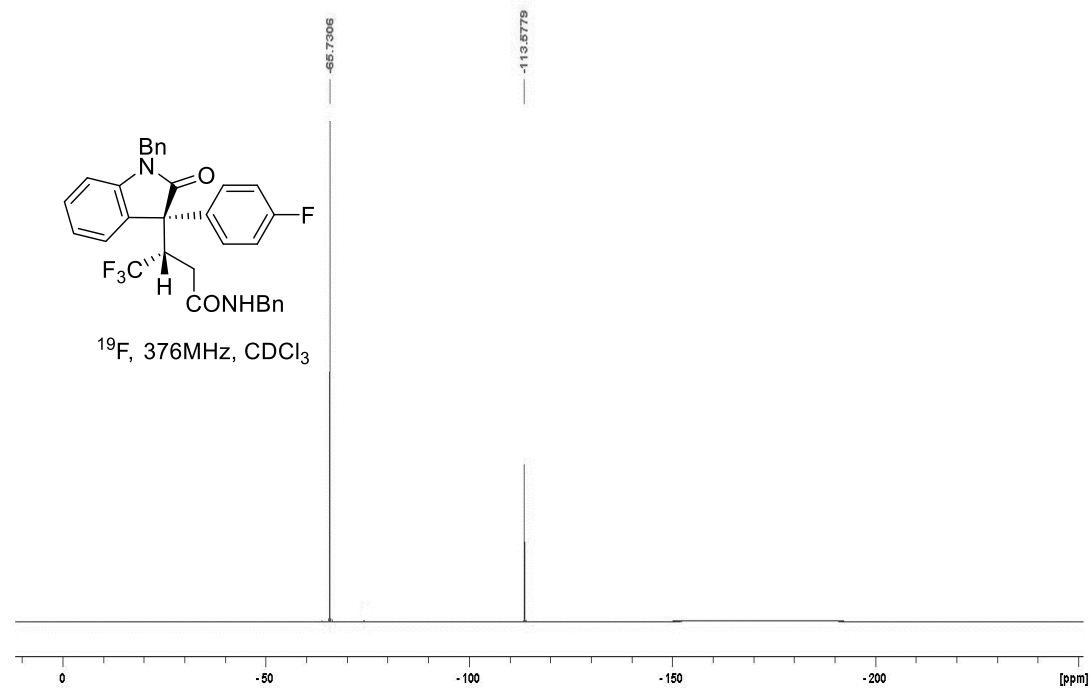





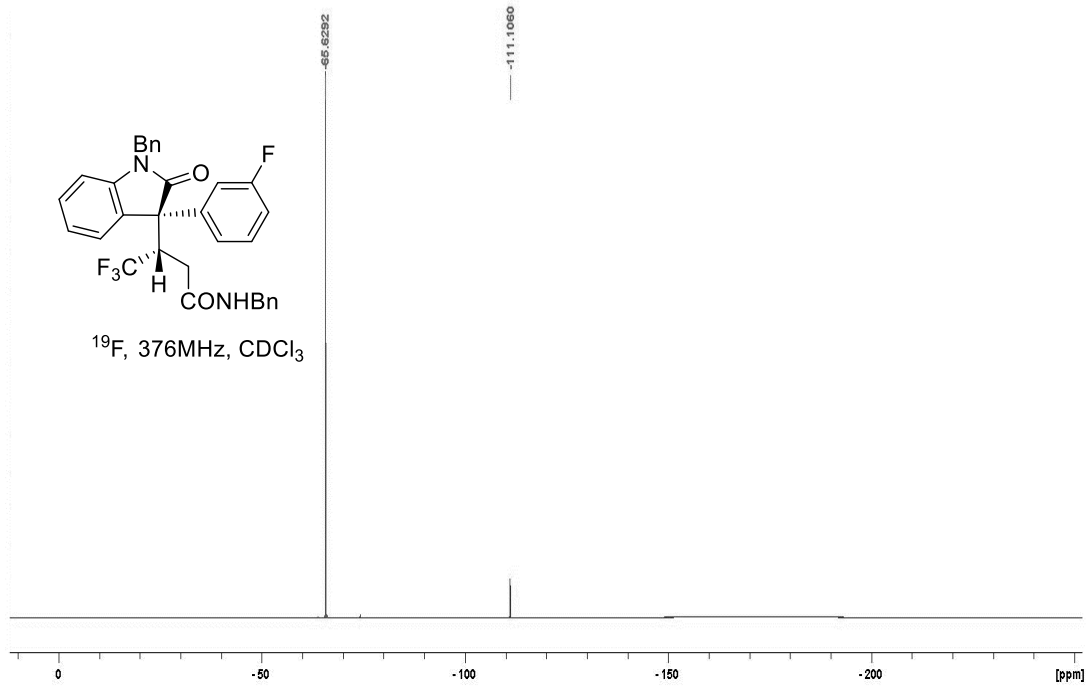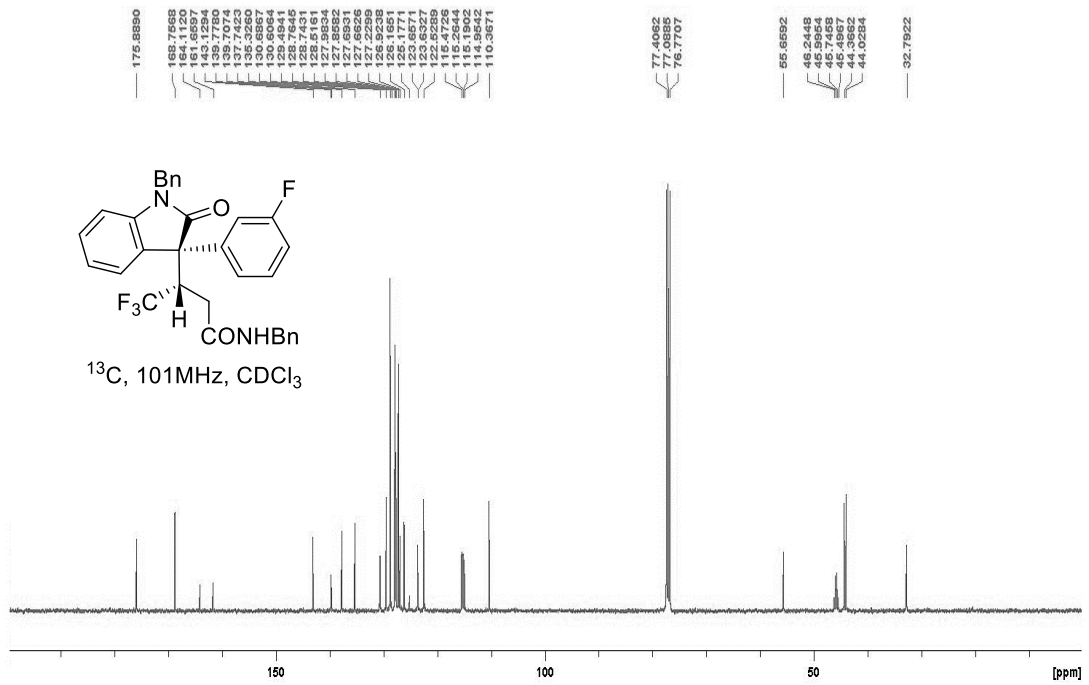



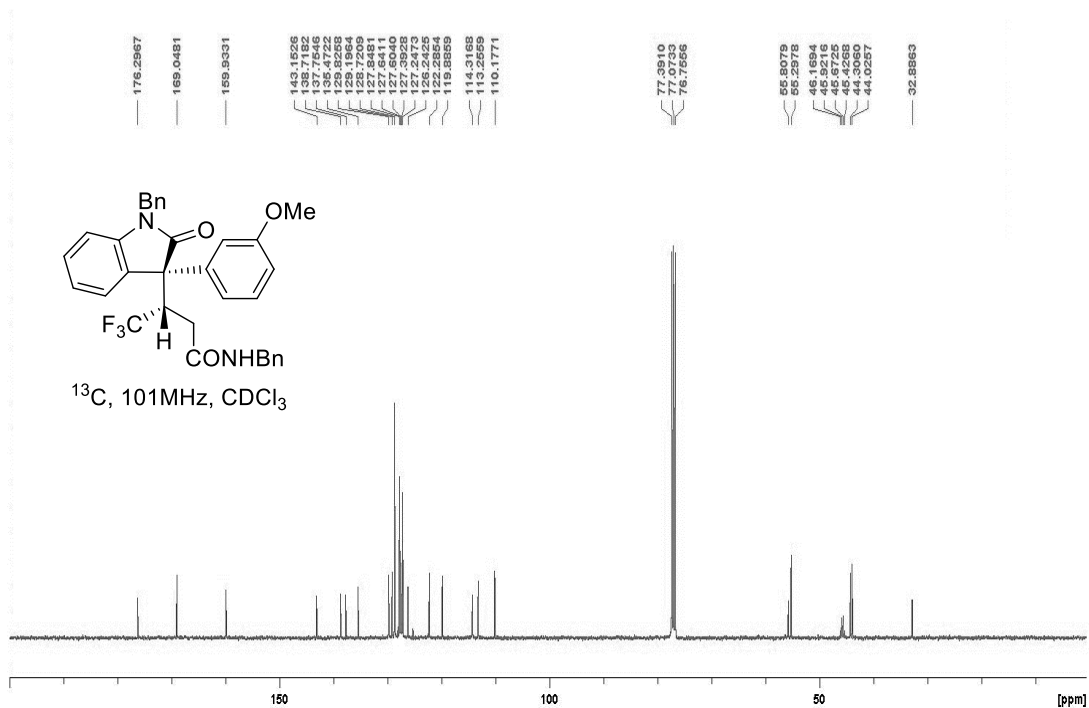

**(S)-N-benzyl-3-((R)-1-benzyl-2-oxo-3-(thiophen-2-yl)indolin-3-yl)-4,4,4-trifluorobutanamide (69)**

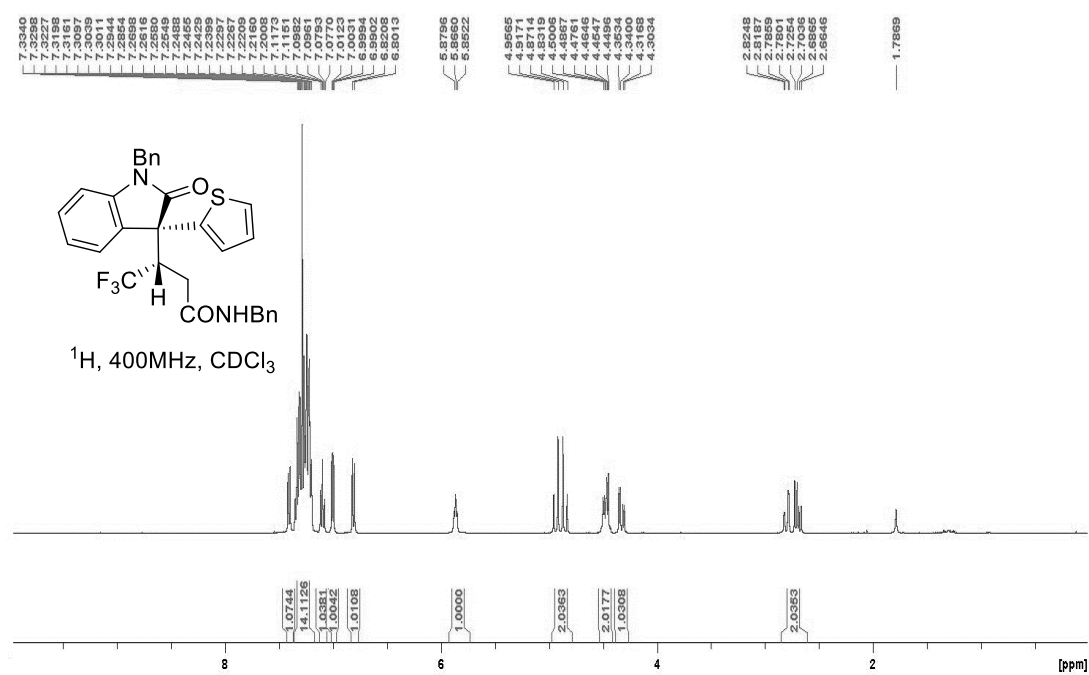

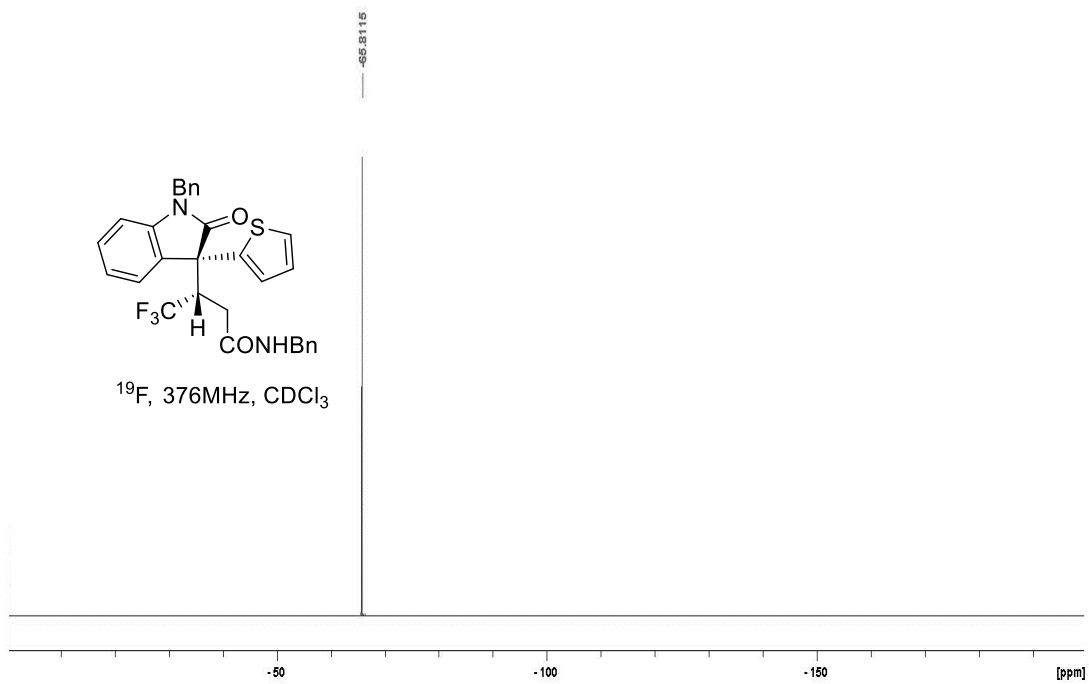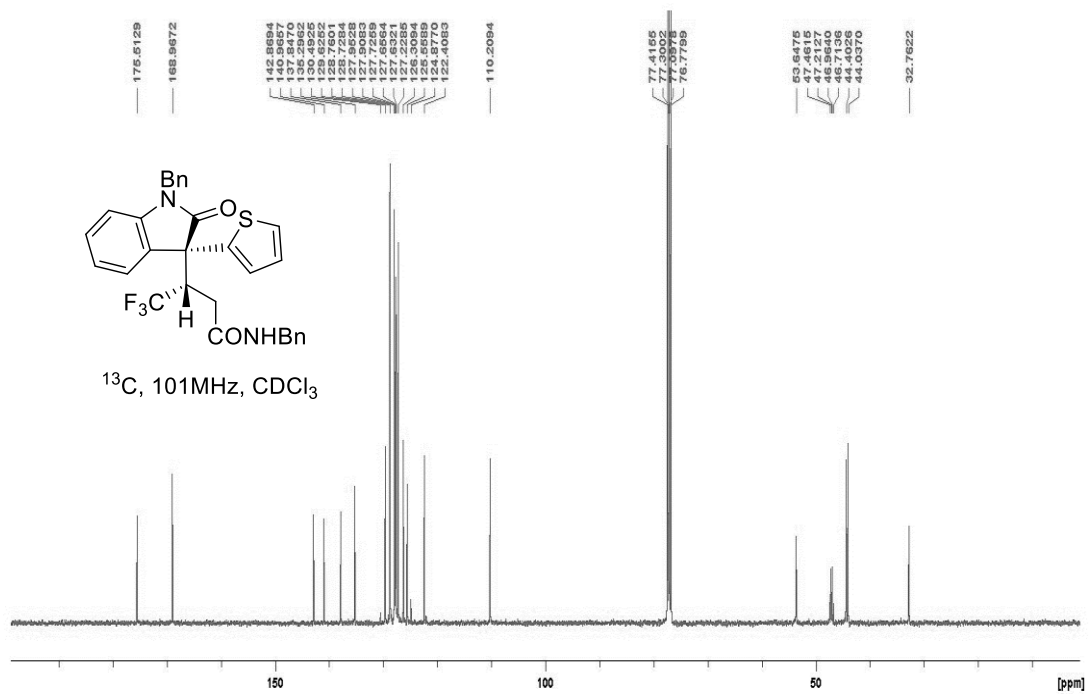

**(S)-N-benzyl-3-((R)-1-benzyl-2-oxo-3-phenylindolin-3-yl)-4,4-difluoro-  
Butanamide (76)**

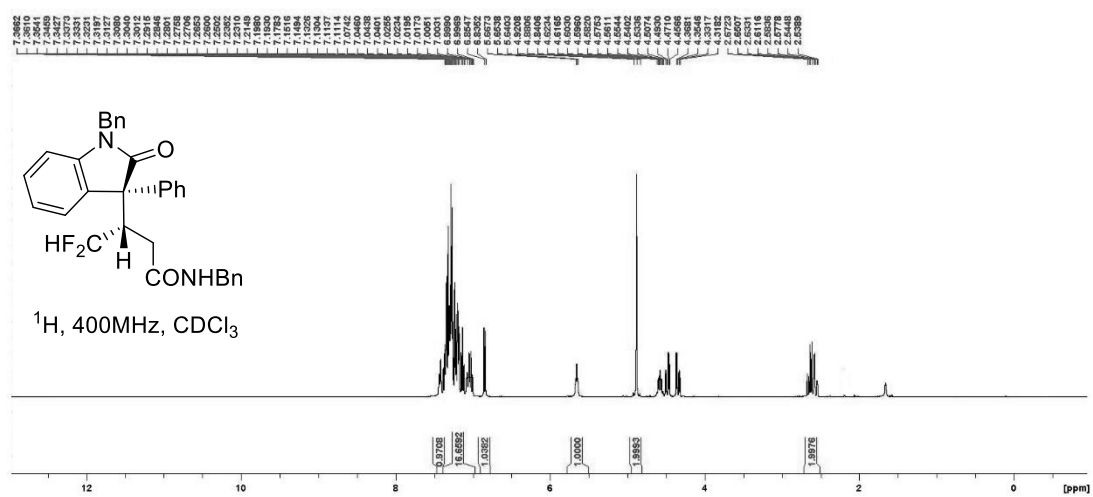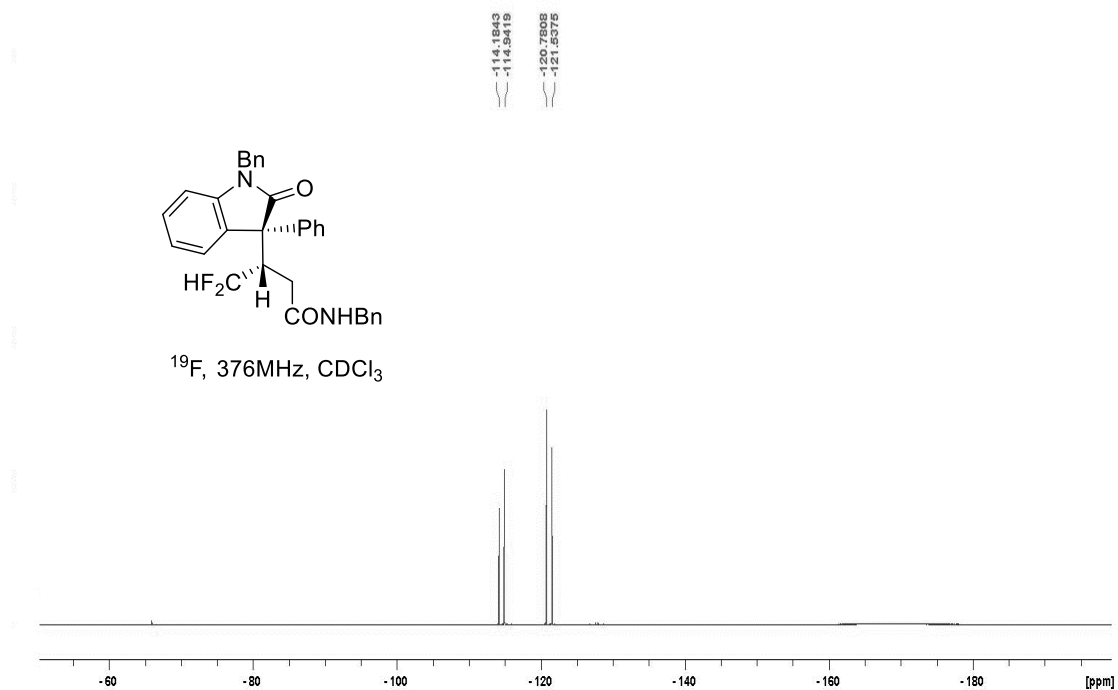

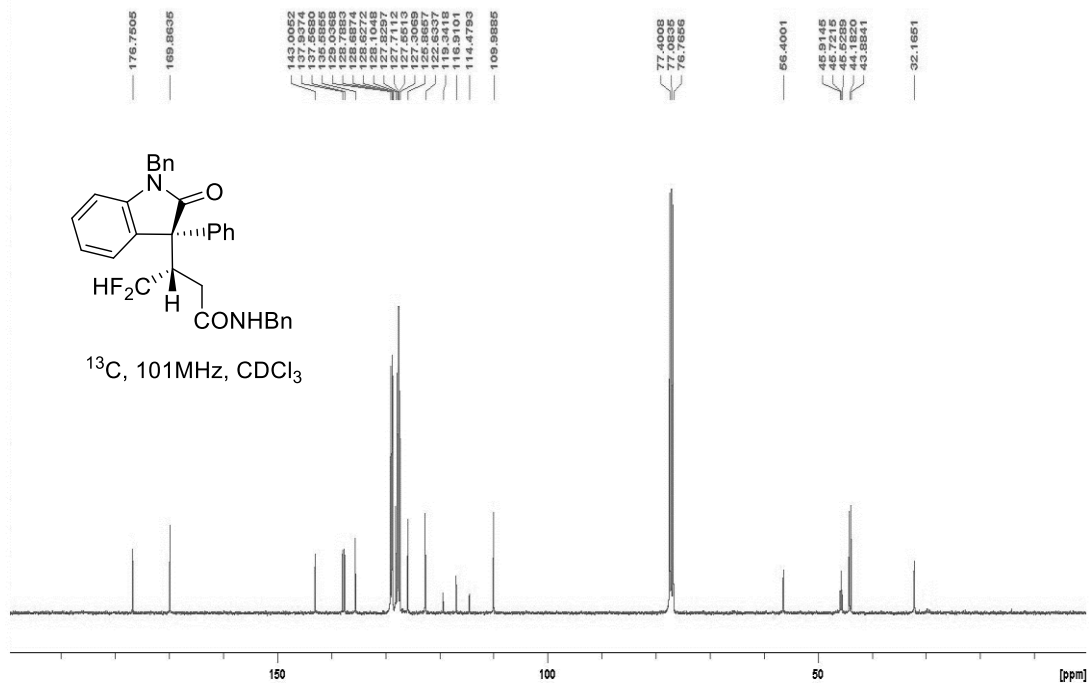

**(S)-N-benzyl-3-((R)-1-benzyl-2-oxo-3-phenylindolin-3-yl)-4-chloro-4,4-difluorobutanamide (77)**

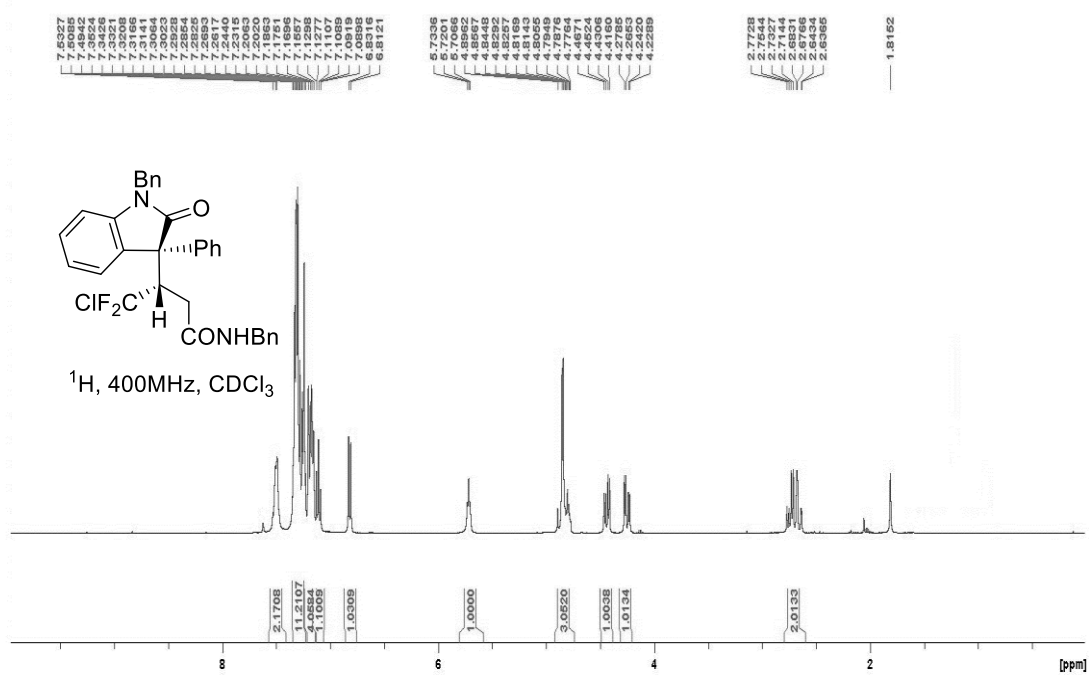

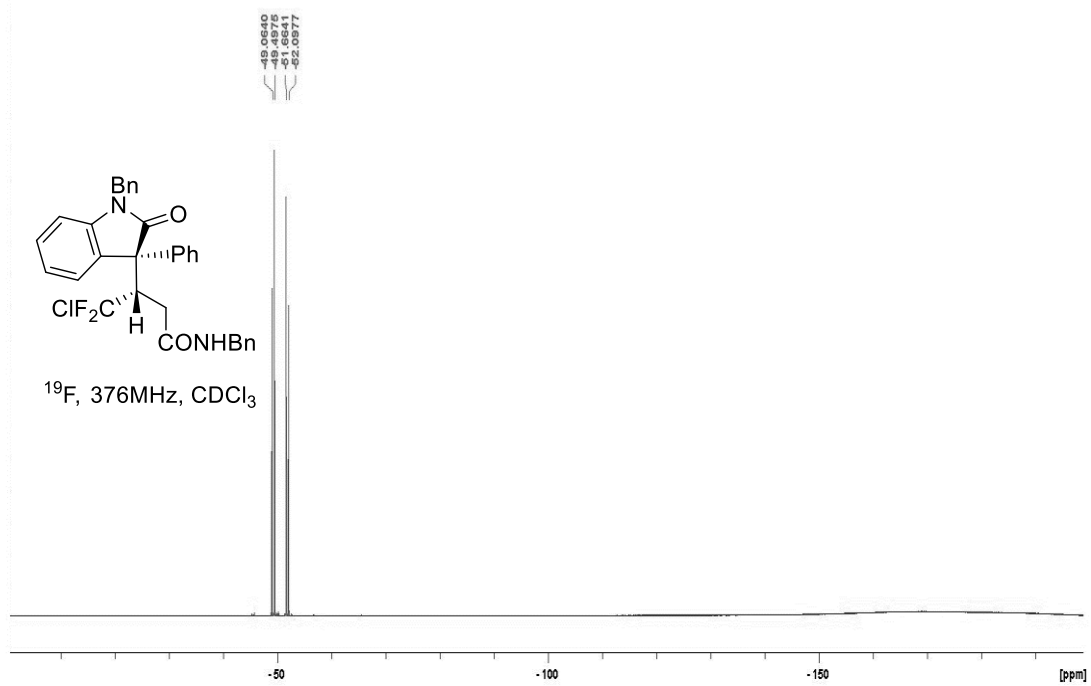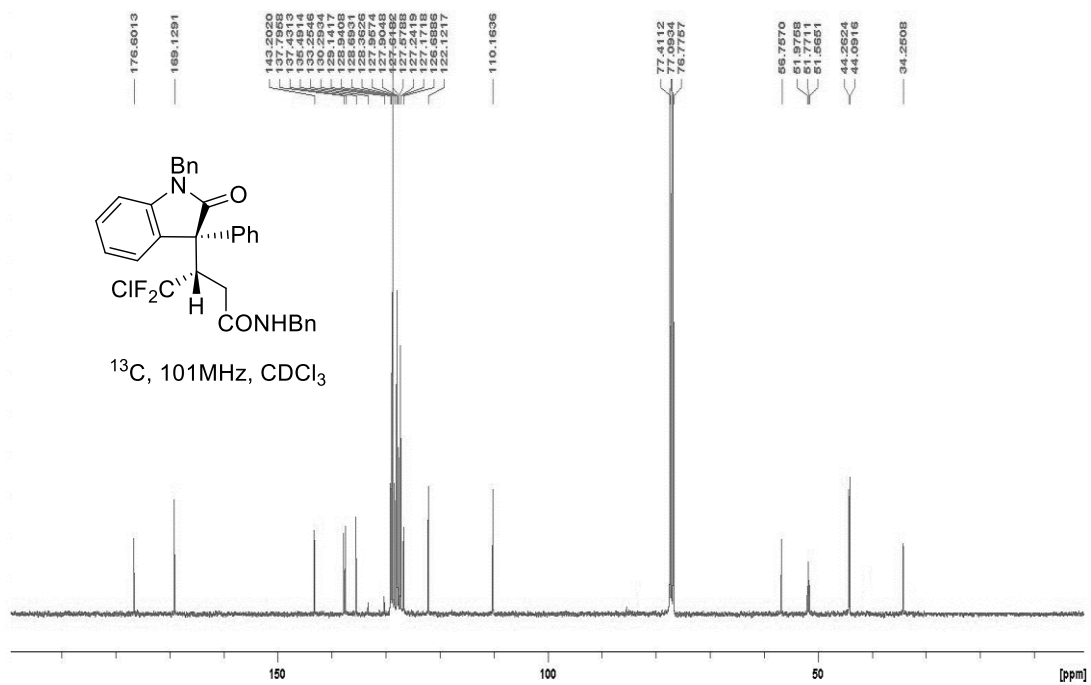



**(S)-N-benzyl-3-((R)-1-benzyl-2-oxo-3-phenylindolin-3-yl)-4-bromo-4,4-difluorobutanamide (78)**

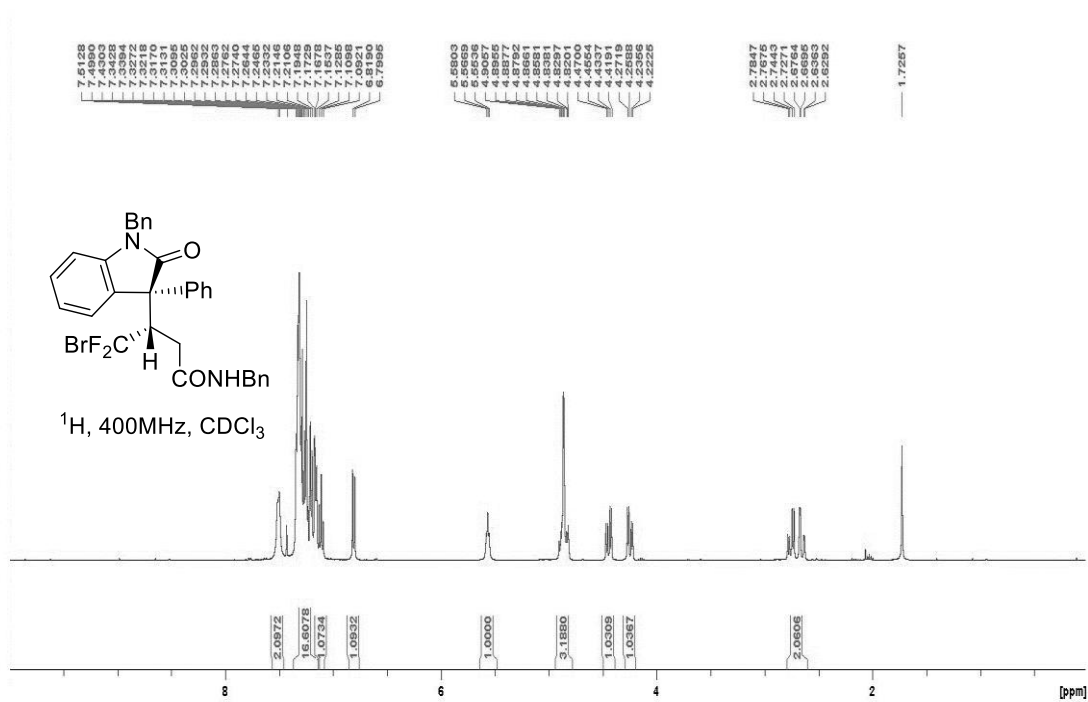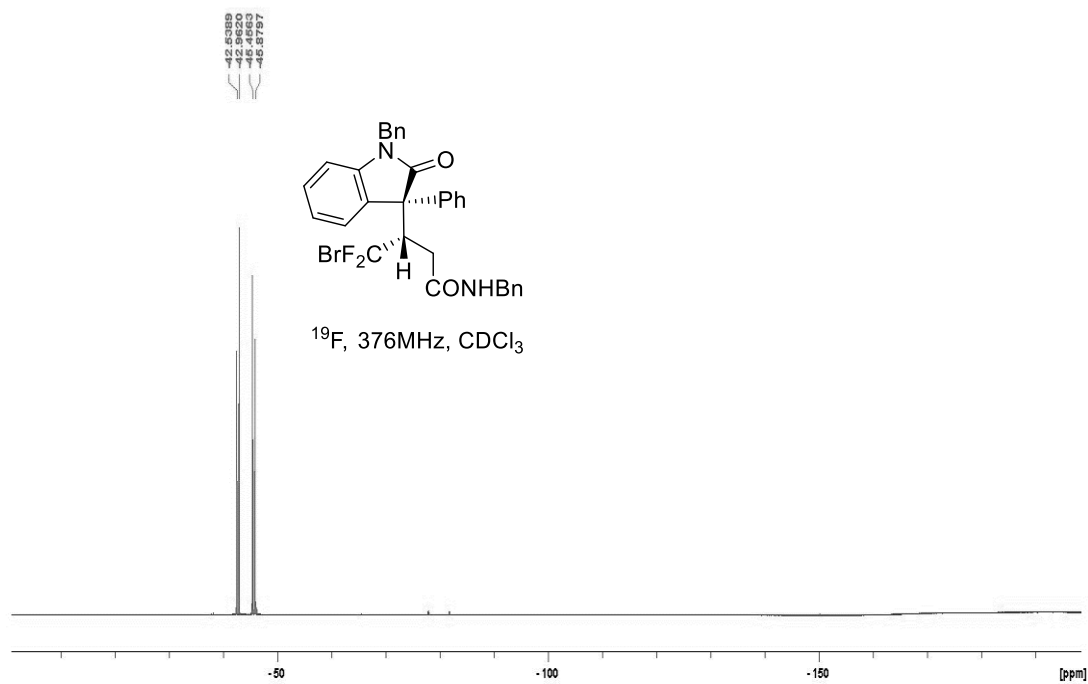



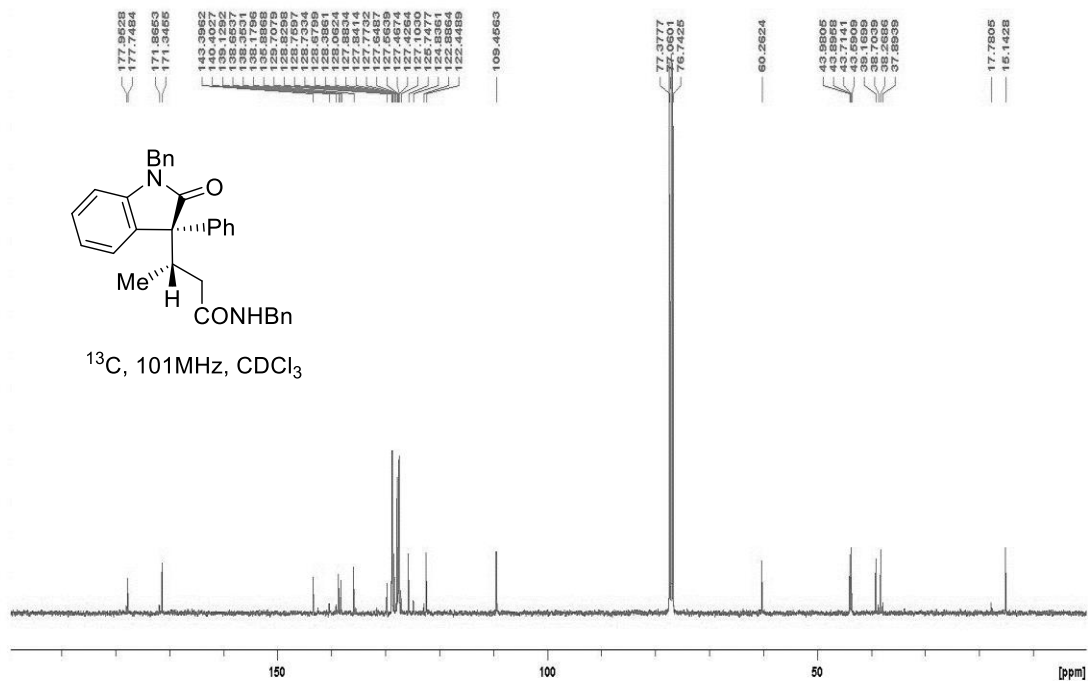

**(R)-N-benzyl-3-((R)-1-benzyl-2-oxo-3-phenylindolin-3-yl)-3-phenylpropanamide (80<sub>major</sub>) and (S)-N-benzyl-3-((R)-1-benzyl-2-oxo-3-phenylindolin-3-yl)-3-phenylpropanamide (80<sub>minor</sub>)**

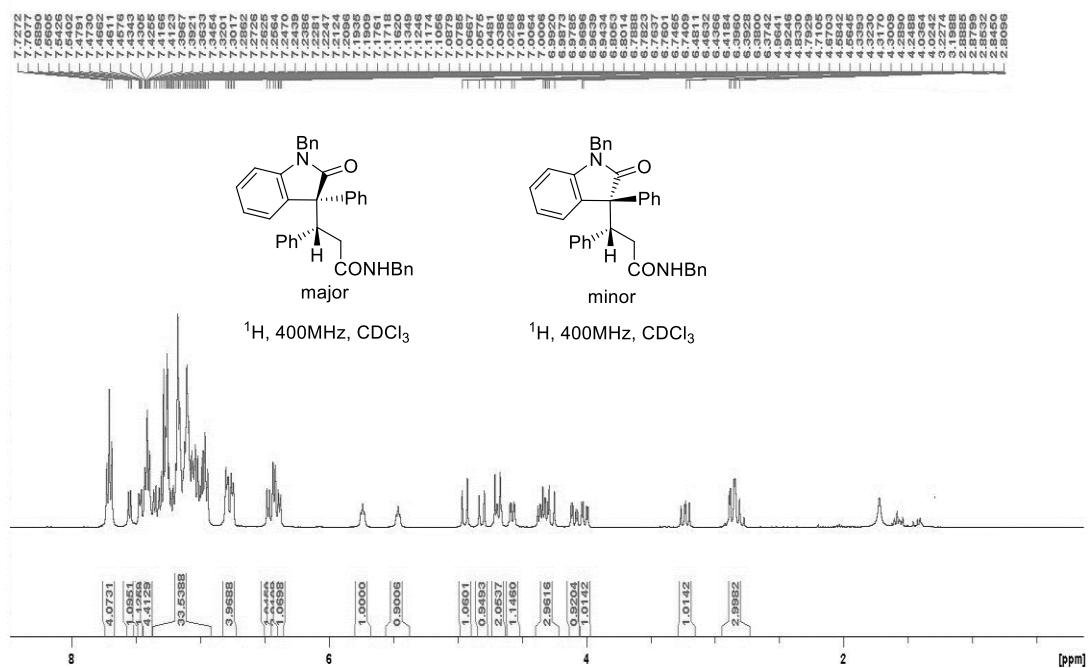





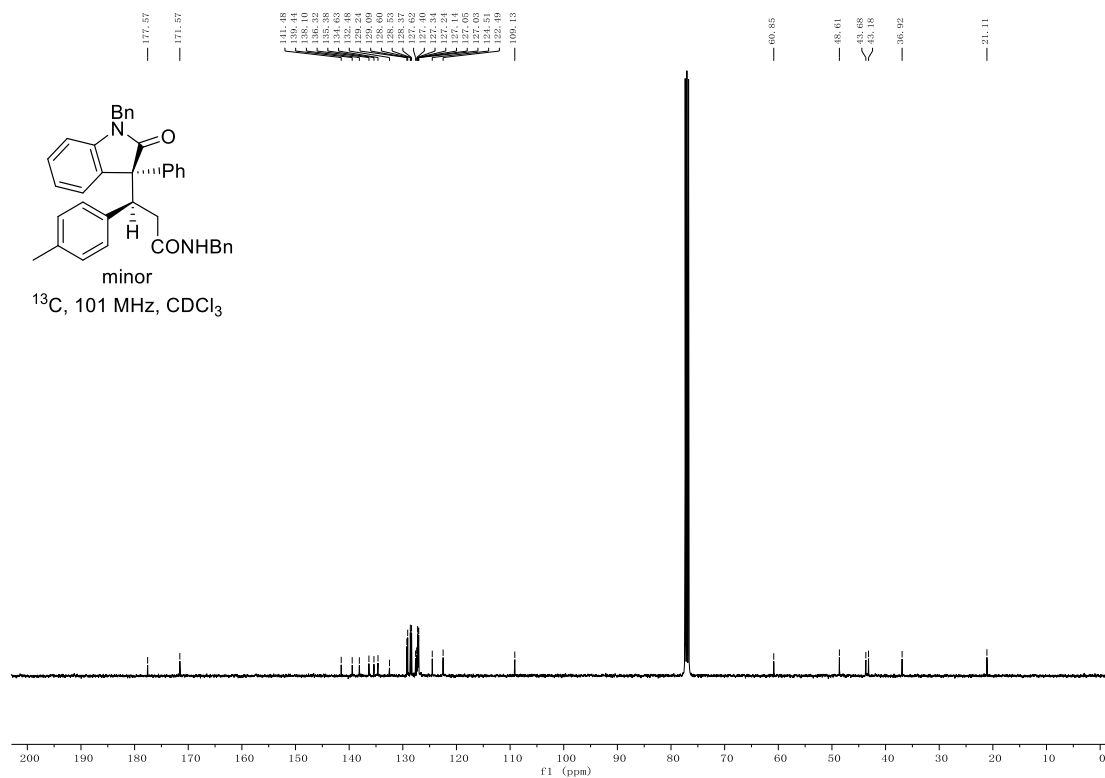

**(R)-N-benzyl-3-((R)-1-benzyl-2-oxo-3-phenylindolin-3-yl)-3-(4-nitrophenyl)propanamide (S4<sub>major</sub>)**

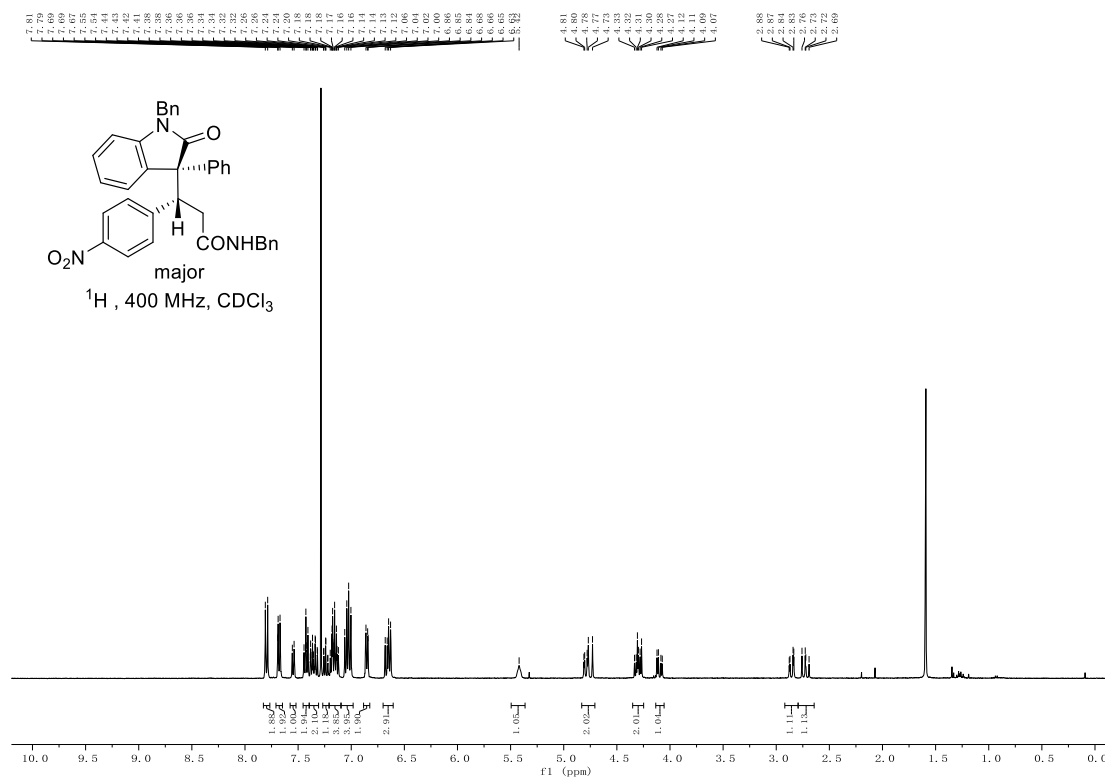







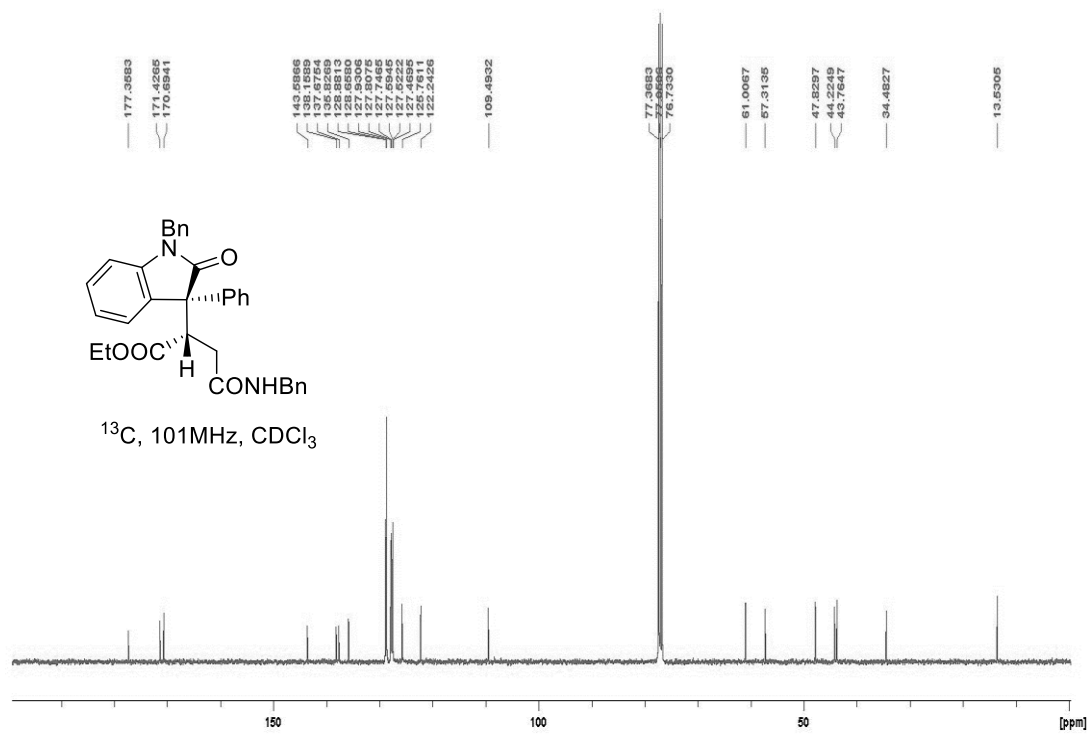

ethyl (*R*)-2-((*R*)-1-benzyl-2-oxo-3-phenylindolin-3-yl)-4-(benzylamino)-4-oxobutanoate (**81**<sub>minor</sub>)

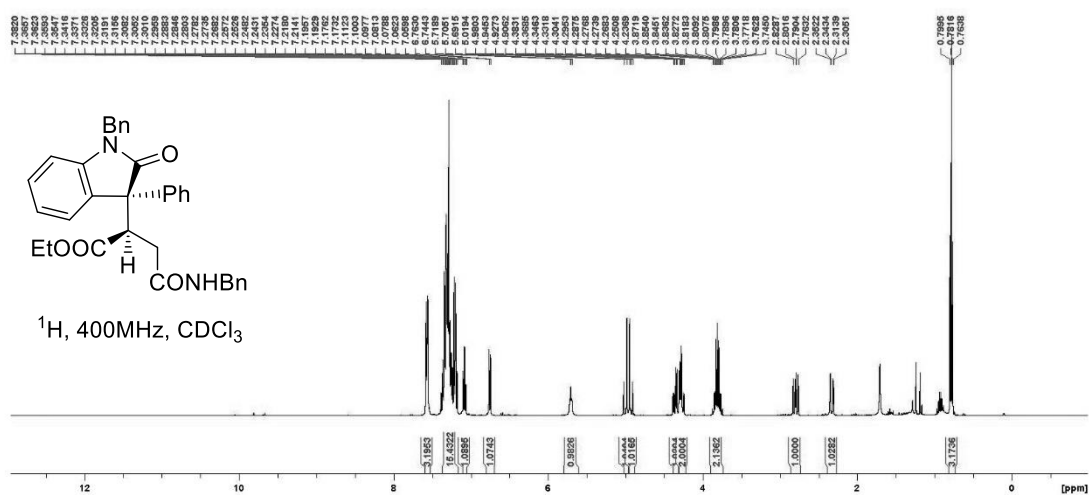

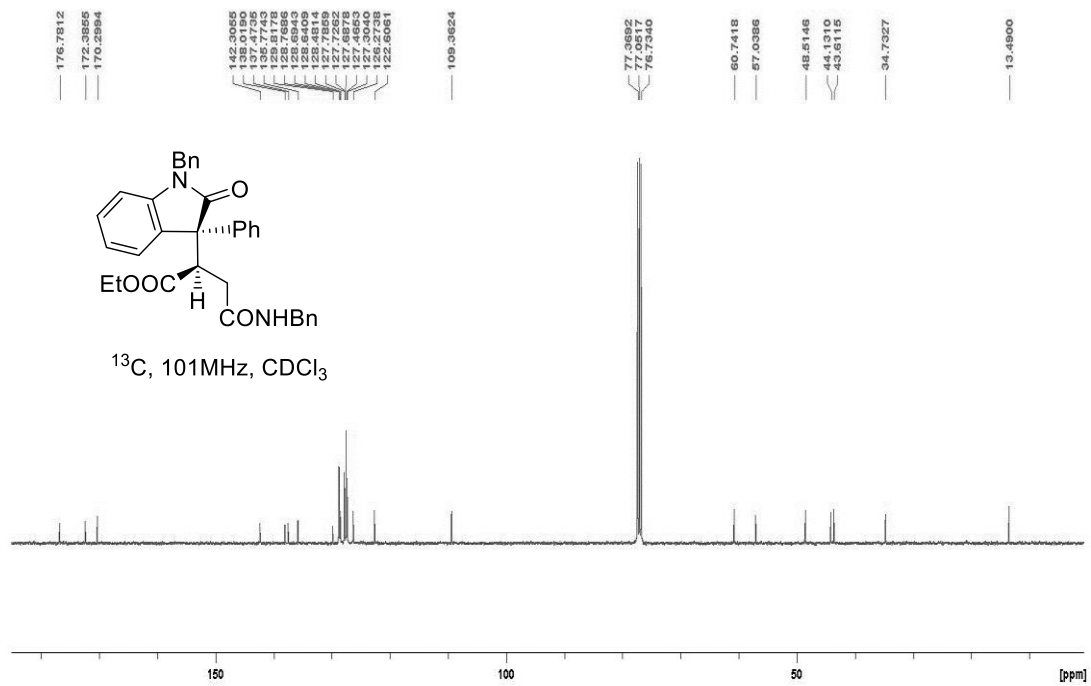

## Appendix IV: HPLC Spectra

HPLC Data for **12<sub>major</sub>**: Chiralcel OD-H (95:5 hexane : IPA, flow rate 1.00 mLmin<sup>-1</sup>, 254 nm, 30 °C) t<sub>R</sub> (minor): 31.3 min, t<sub>R</sub> (major): 38.3 min, 96:4 er.

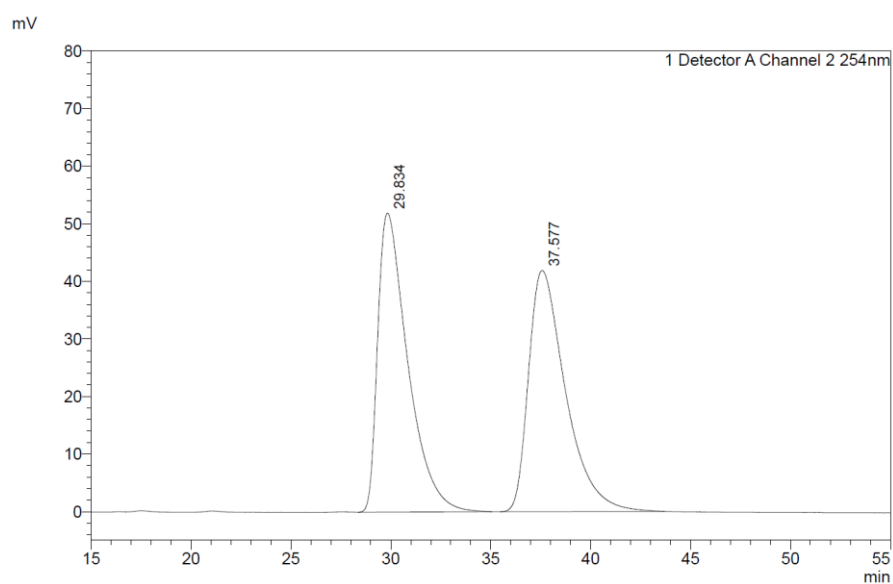

Detector A Channel 2 254nm

| Peak# | Ret. Time | Area%   |
|-------|-----------|---------|
| 1     | 29.834    | 50.152  |
| 2     | 37.577    | 49.848  |
| Total |           | 100.000 |

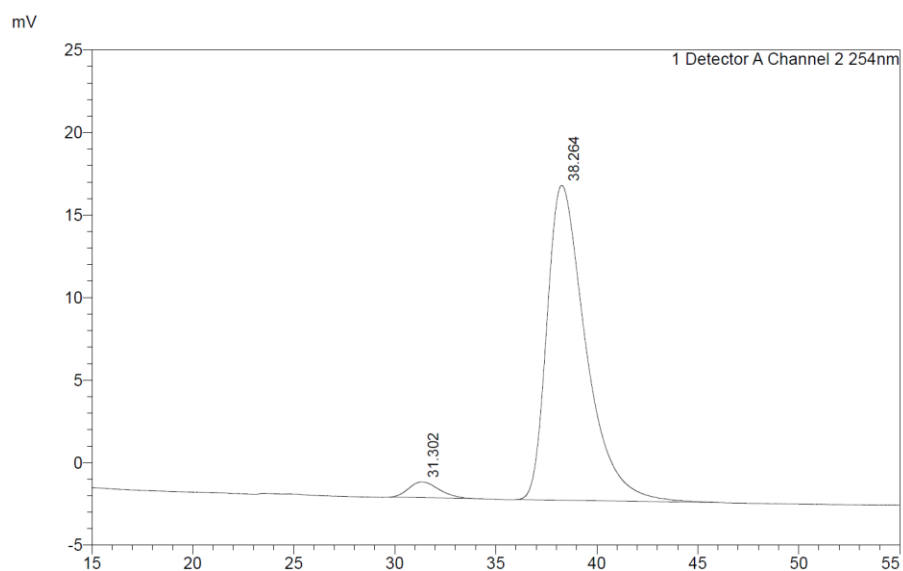

Detector A Channel 2 254nm

| Peak# | Ret. Time | Area%   |
|-------|-----------|---------|
| 1     | 31.302    | 3.703   |
| 2     | 38.264    | 96.297  |
| Total |           | 100.000 |

HPLC Data for **12**<sub>minor</sub>: Chiralpak AD-H (95:5 hexane : IPA, flow rate 1.00 mLmin<sup>-1</sup>, 254 nm, 30 °C) t<sub>R</sub>  
 (minor): 17.1 min, t<sub>R</sub> (major): 23.1 min, 96:4 er.

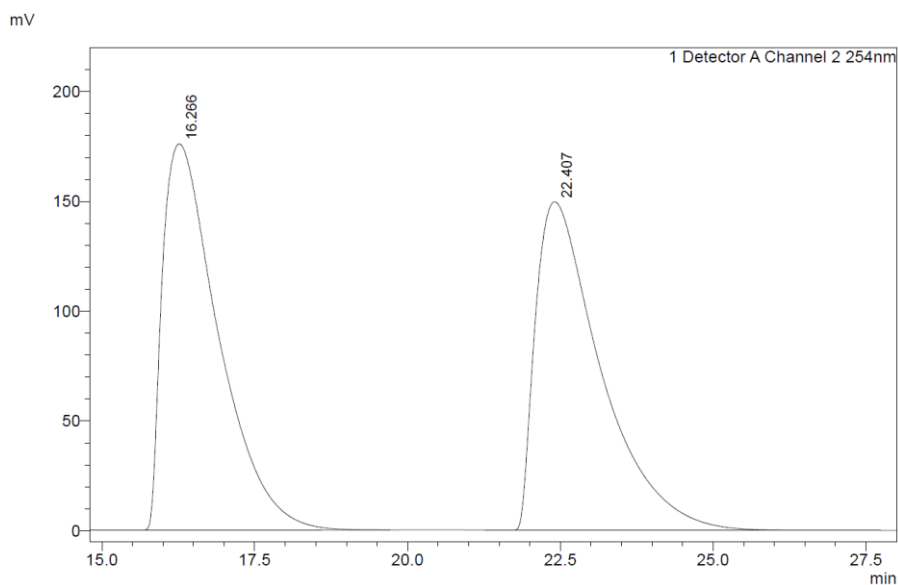

Detector A Channel 2 254nm

| Peak# | Ret. Time | Area%   |
|-------|-----------|---------|
| 1     | 16.266    | 50.188  |
| 2     | 22.407    | 49.812  |
| Total |           | 100.000 |

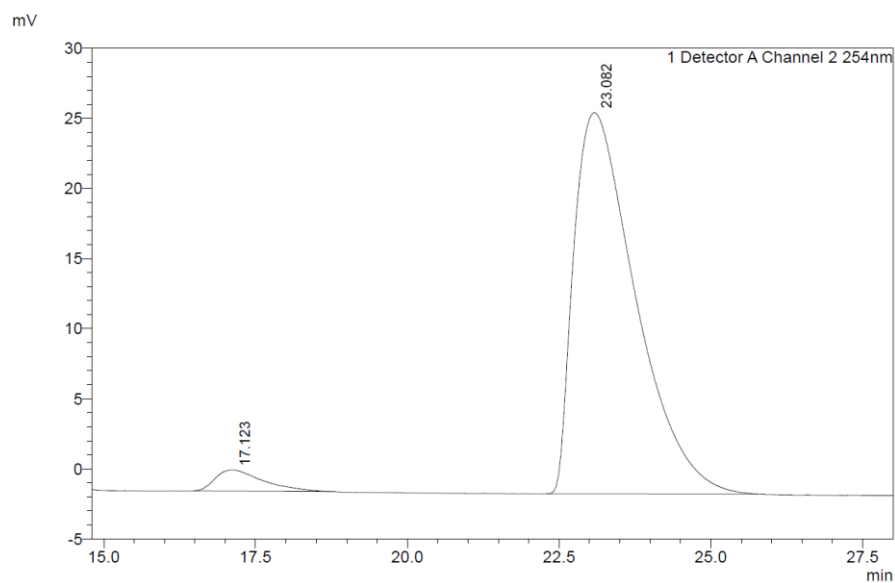

Detector A Channel 2 254nm

| Peak# | Ret. Time | Area%   |
|-------|-----------|---------|
| 1     | 17.123    | 4.113   |
| 2     | 23.082    | 95.887  |
| Total |           | 100.000 |

HPLC Data for **25**<sub>major</sub>: Chiralcel OJ-H (93:7 hexane : IPA, flow rate 1.00 mLmin<sup>-1</sup>, 254 nm, 30 °C) t<sub>R</sub> (minor): 15.8 min, t<sub>R</sub> (major): 19.5 min, 92:8 er.

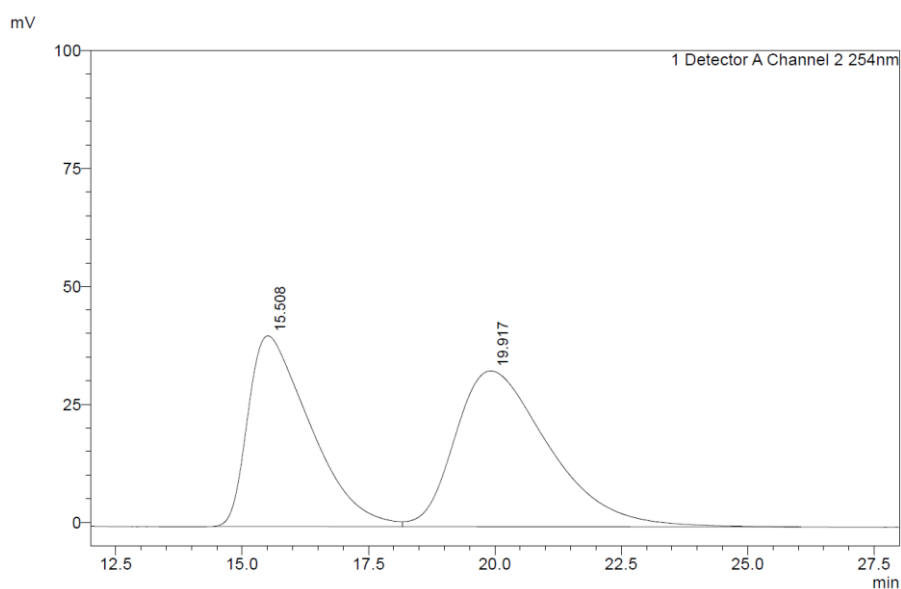

Detector A Channel 2 254nm

| Peak# | Ret. Time | Area%   |
|-------|-----------|---------|
| 1     | 15.508    | 49.283  |
| 2     | 19.917    | 50.717  |
| Total |           | 100.000 |

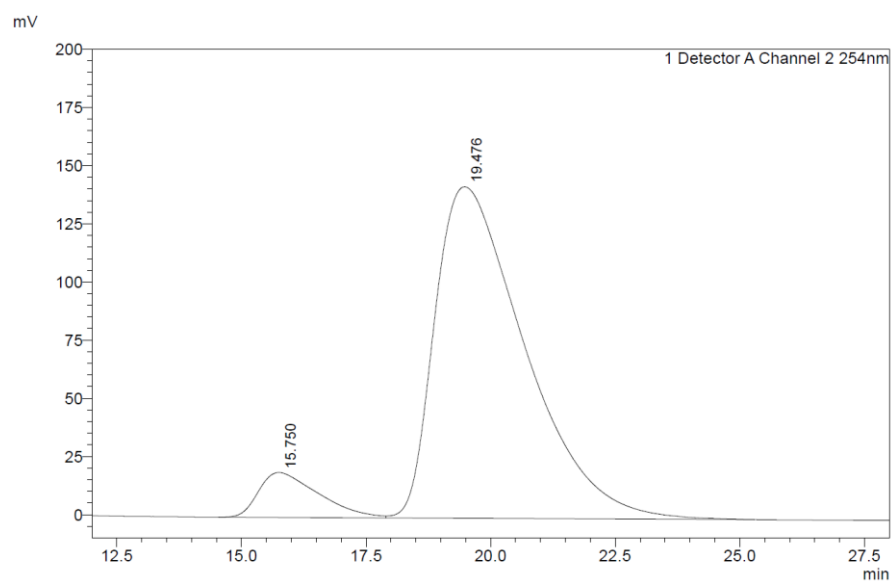

Detector A Channel 2 254nm

| Peak# | Ret. Time | Area%   |
|-------|-----------|---------|
| 1     | 15.750    | 8.217   |
| 2     | 19.476    | 91.783  |
| Total |           | 100.000 |

HPLC Data for **25<sub>minor</sub>**: Chiralpak AD-H (97:3 hexane : IPA, flow rate 1.00 mLmin<sup>-1</sup>, 254 nm, 30 °C) t<sub>R</sub>  
 (minor): 22.6 min, t<sub>R</sub> (major): 29.5 min, 96:4 er.

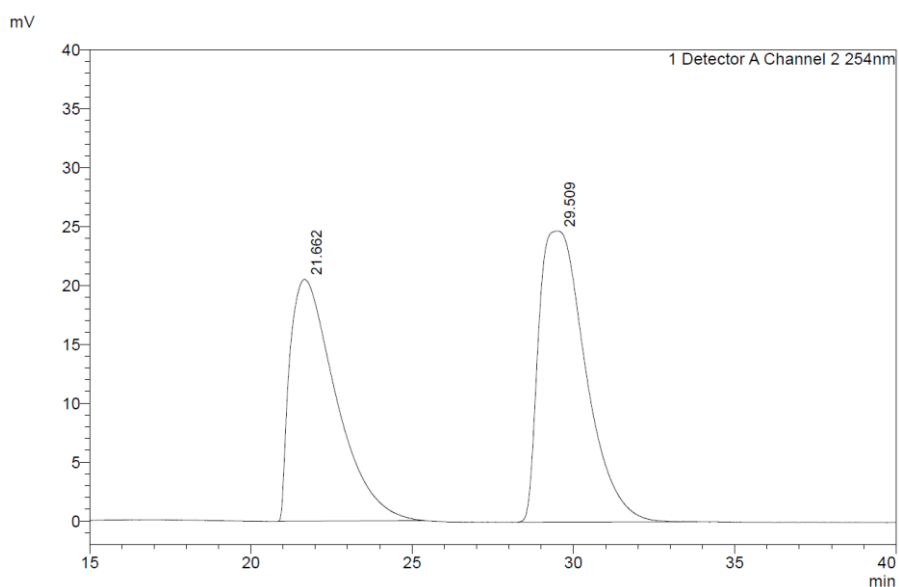

Detector A Channel 2 254nm

| Peak# | Ret. Time | Area%   |
|-------|-----------|---------|
| 1     | 21.662    | 49.733  |
| 2     | 29.509    | 50.267  |
| Total |           | 100.000 |

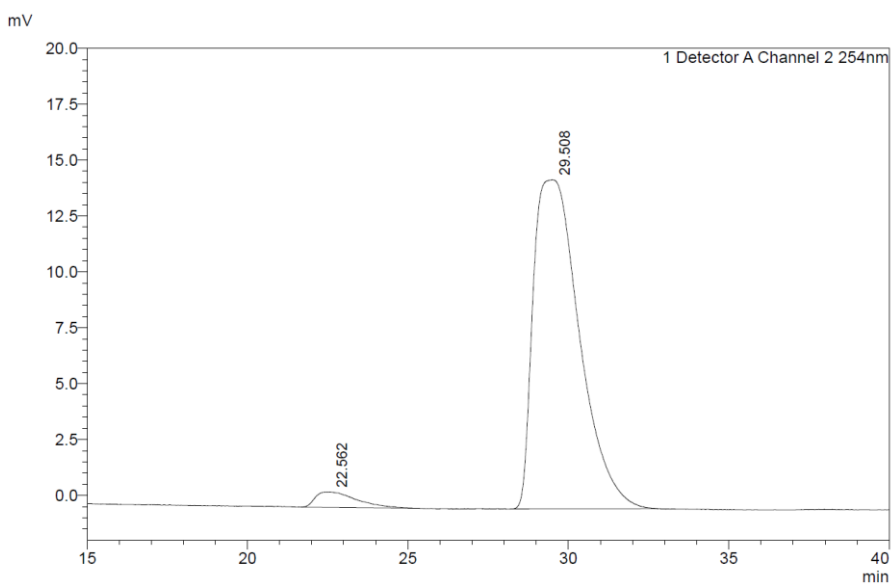

Detector A Channel 2 254nm

| Peak# | Ret. Time | Area%   |
|-------|-----------|---------|
| 1     | 22.562    | 3.991   |
| 2     | 29.508    | 96.009  |
| Total |           | 100.000 |

HPLC Data for **26**<sub>major</sub>: Chiralpak AD-H (90:10 hexane : IPA, flow rate 1.00 mLmin<sup>-1</sup>, 254 nm, 30 °C)  
 t<sub>R</sub> (major): 16.3 min, t<sub>R</sub> (minor): 41.8 min, 97:3 er.

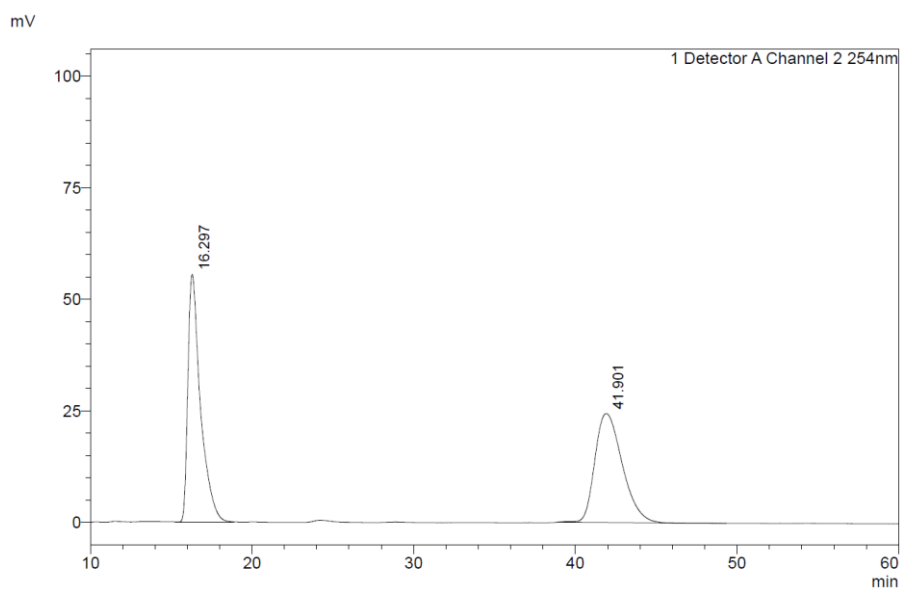

| Detector A Channel 2 254nm |           |         |
|----------------------------|-----------|---------|
| Peak#                      | Ret. Time | Area%   |
| 1                          | 16.297    | 50.930  |
| 2                          | 41.901    | 49.070  |
| Total                      |           | 100.000 |

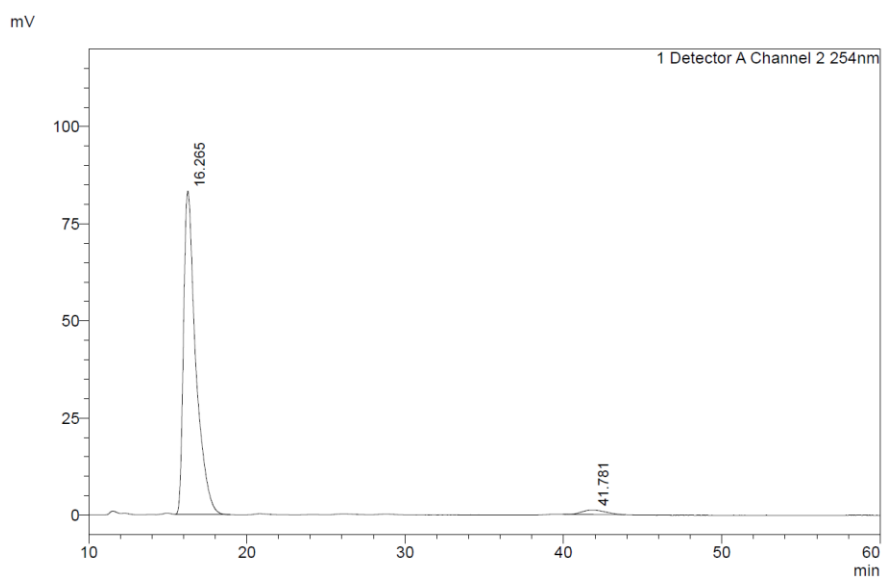

| Detector A Channel 2 254nm |           |         |
|----------------------------|-----------|---------|
| Peak#                      | Ret. Time | Area%   |
| 1                          | 16.265    | 97.396  |
| 2                          | 41.781    | 2.604   |
| Total                      |           | 100.000 |

HPLC Data for **26<sub>minor</sub>**: Chiralpak AD-H (93:7 hexane : IPA, flow rate 1.00 mLmin<sup>-1</sup>, 254 nm, 30 °C) t<sub>R</sub>  
 (minor): 19.0 min, t<sub>R</sub> (major): 39.7 min, 97:3 er.

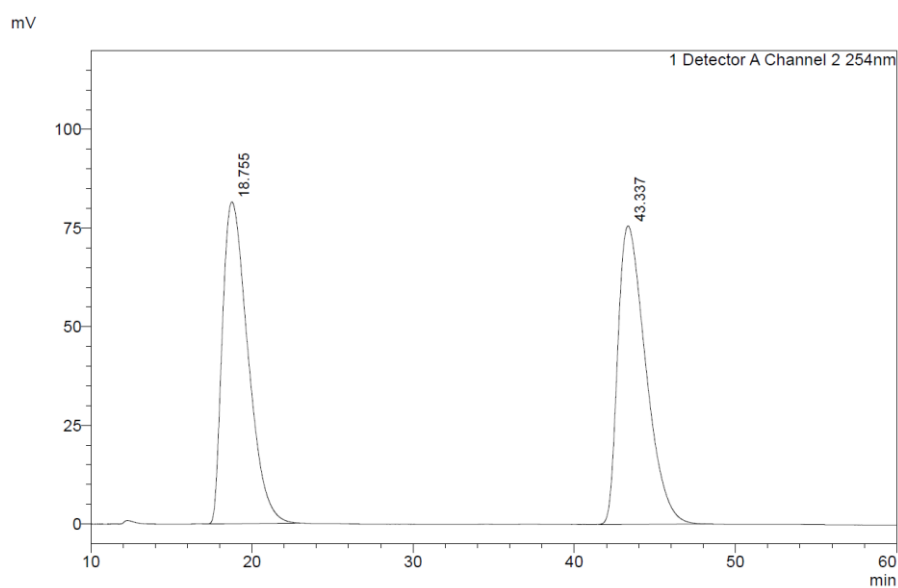

| Detector A Channel 2 254nm |           |         |
|----------------------------|-----------|---------|
| Peak#                      | Ret. Time | Area%   |
| 1                          | 18.755    | 49.594  |
| 2                          | 43.337    | 50.406  |
| Total                      |           | 100.000 |

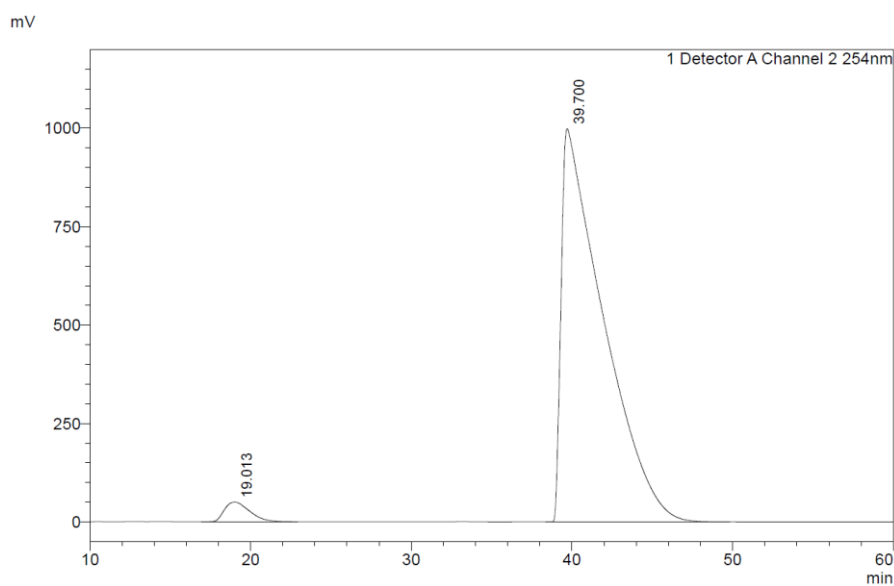

| Detector A Channel 2 254nm |           |         |
|----------------------------|-----------|---------|
| Peak#                      | Ret. Time | Area%   |
| 1                          | 19.013    | 2.913   |
| 2                          | 39.700    | 97.087  |
| Total                      |           | 100.000 |



HPLC Data for **27**<sub>major</sub>: Chiralpak AD-H (90:10 hexane : IPA, flow rate 1.00 mLmin<sup>-1</sup>, 254 nm, 30 °C)  
 t<sub>R</sub> (major): 15.0 min, t<sub>R</sub> (minor): 41.9 min, 96:4 er.

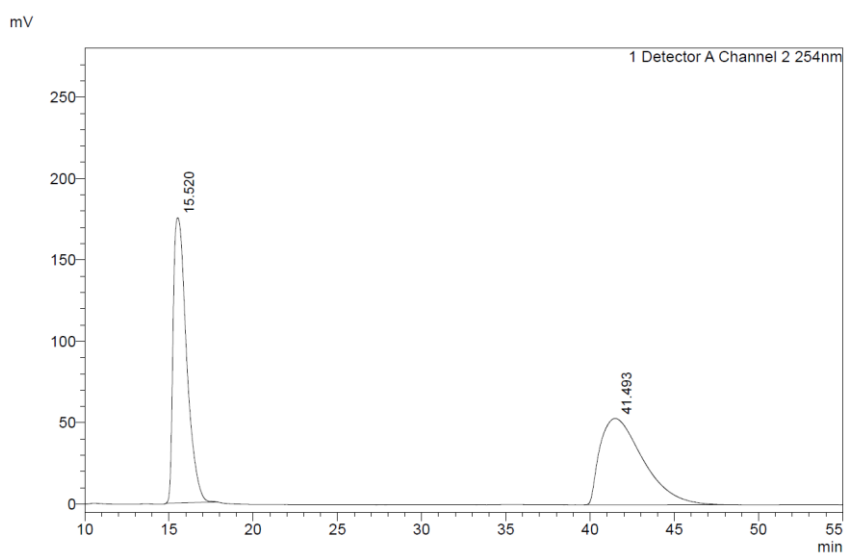

| Detector A Channel 2 254nm |           |         |
|----------------------------|-----------|---------|
| Peak#                      | Ret. Time | Area%   |
| 1                          | 15.520    | 50.688  |
| 2                          | 41.493    | 49.312  |
| Total                      |           | 100.000 |

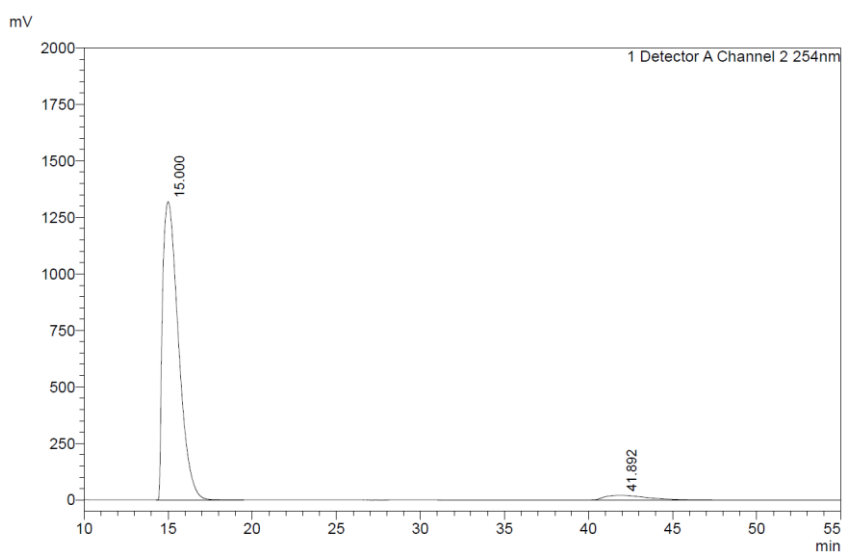

| Detector A Channel 2 254nm |           |         |
|----------------------------|-----------|---------|
| Peak#                      | Ret. Time | Area%   |
| 1                          | 15.000    | 96.056  |
| 2                          | 41.892    | 3.944   |
| Total                      |           | 100.000 |

HPLC Data for **27**<sub>minor</sub>: Chiralpak AD-H (97:3 hexane : IPA, flow rate 1.00 mLmin<sup>-1</sup>, 254 nm, 30 °C) t<sub>R</sub> (major): 30.9 min, t<sub>R</sub> (minor): 36.4 min, 98:2 er.

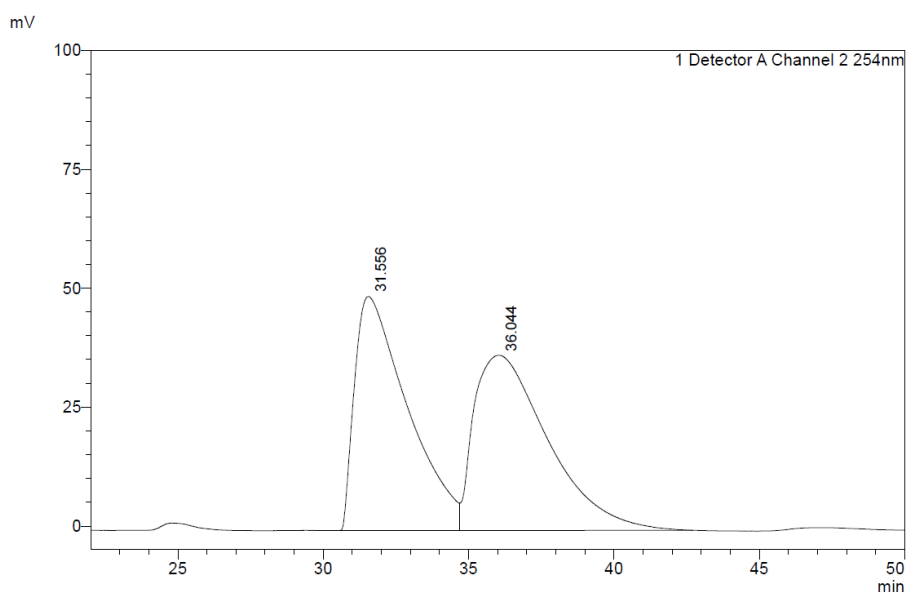

| Detector A Channel 2 254nm |           |         |
|----------------------------|-----------|---------|
| Peak#                      | Ret. Time | Area%   |
| 1                          | 31.556    | 49.939  |
| 2                          | 36.044    | 50.061  |
| Total                      |           | 100.000 |

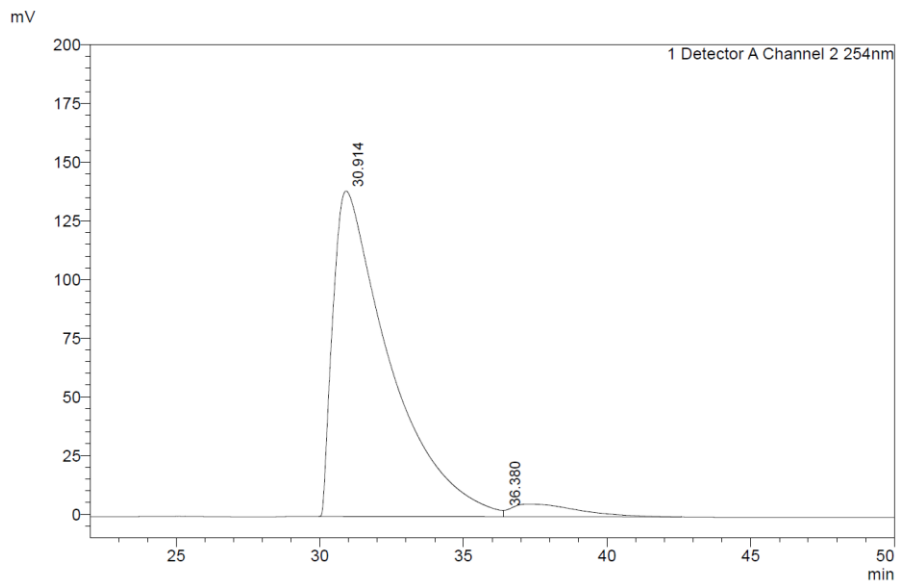

| Detector A Channel 2 254nm |           |         |
|----------------------------|-----------|---------|
| Peak#                      | Ret. Time | Area%   |
| 1                          | 30.914    | 97.586  |
| 2                          | 36.380    | 2.414   |
| Total                      |           | 100.000 |

HPLC Data for **28**<sub>major</sub>: Chiralpak AD-H (90:10 hexane : IPA, flow rate 1.00 mLmin<sup>-1</sup>, 254 nm, 30 °C)  
 t<sub>R</sub> (major): 16.1 min, t<sub>R</sub> (minor): 21.9 min, 96:4 er.

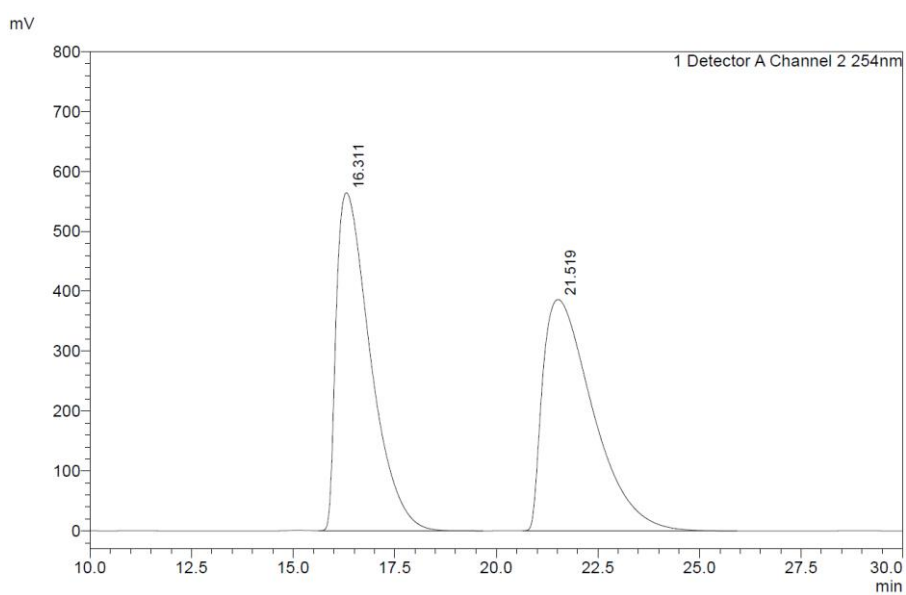

Detector A Channel 2 254nm

| Peak# | Ret. Time | Area%   |
|-------|-----------|---------|
| 1     | 16.311    | 49.782  |
| 2     | 21.519    | 50.218  |
| Total |           | 100.000 |

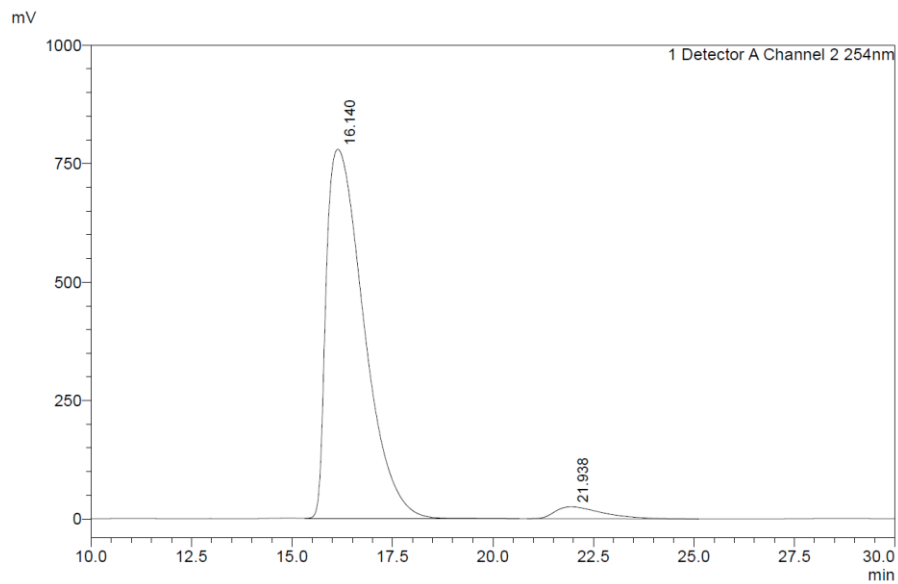

Detector A Channel 2 254nm

| Peak# | Ret. Time | Area%   |
|-------|-----------|---------|
| 1     | 16.140    | 96.102  |
| 2     | 21.938    | 3.898   |
| Total |           | 100.000 |

HPLC Data for **28**<sub>minor</sub>: Chiralcel OD-H (97:3 hexane : IPA, flow rate 1.00 mLmin<sup>-1</sup>, 254 nm, 30 °C) t<sub>R</sub>  
 (major): 15.2 min, t<sub>R</sub> (minor): 24.7 min, 96:4 er.

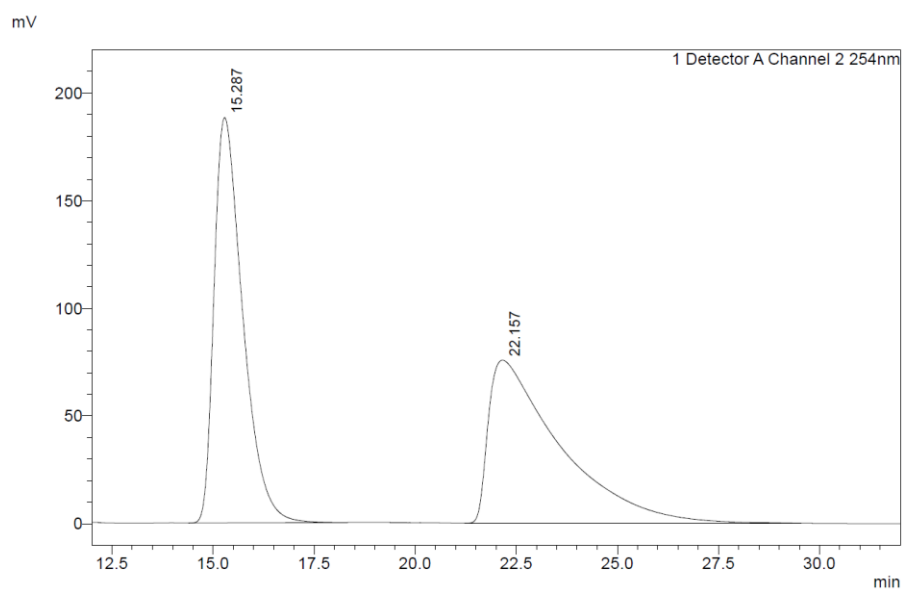

| Detector A Channel 2 254nm |           |         |
|----------------------------|-----------|---------|
| Peak#                      | Ret. Time | Area%   |
| 1                          | 15.287    | 49.857  |
| 2                          | 22.157    | 50.143  |
| Total                      |           | 100.000 |

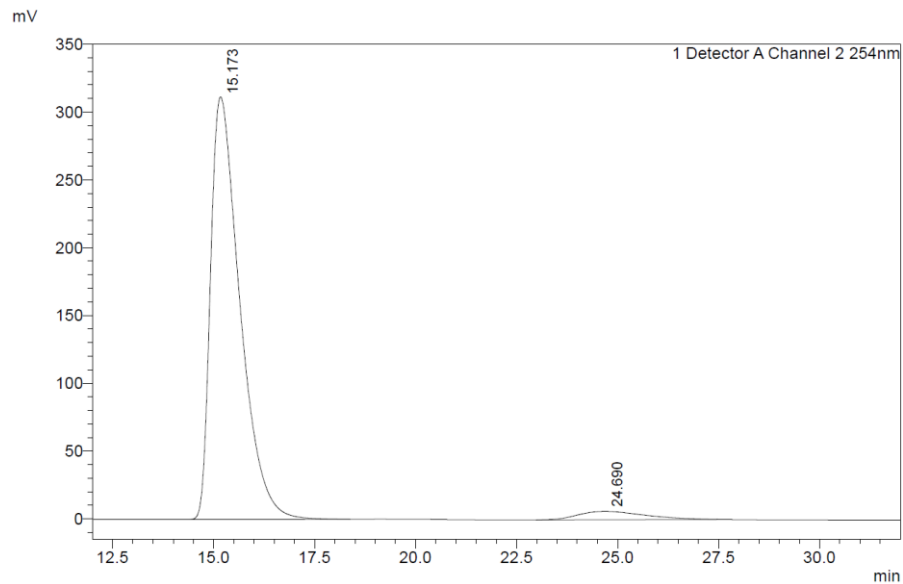

| Detector A Channel 2 254nm |           |         |
|----------------------------|-----------|---------|
| Peak#                      | Ret. Time | Area%   |
| 1                          | 15.173    | 95.685  |
| 2                          | 24.690    | 4.315   |
| Total                      |           | 100.000 |

HPLC Data for **29**<sub>major</sub>: Chiralpak AD-H (85:15 hexane : IPA, flow rate 1.00 mLmin<sup>-1</sup>, 254 nm, 30 °C)  
 t<sub>R</sub> (major): 11.7 min, t<sub>R</sub> (minor): 21.2 min, 99:1 er.

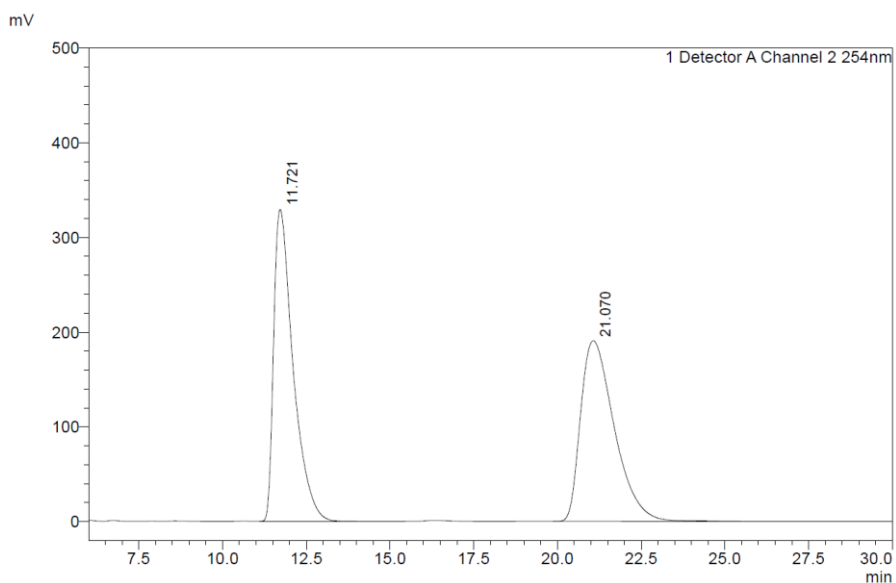

| Detector A Channel 2 254nm |           |         |
|----------------------------|-----------|---------|
| Peak#                      | Ret. Time | Area%   |
| 1                          | 11.721    | 49.842  |
| 2                          | 21.070    | 50.158  |
| Total                      |           | 100.000 |

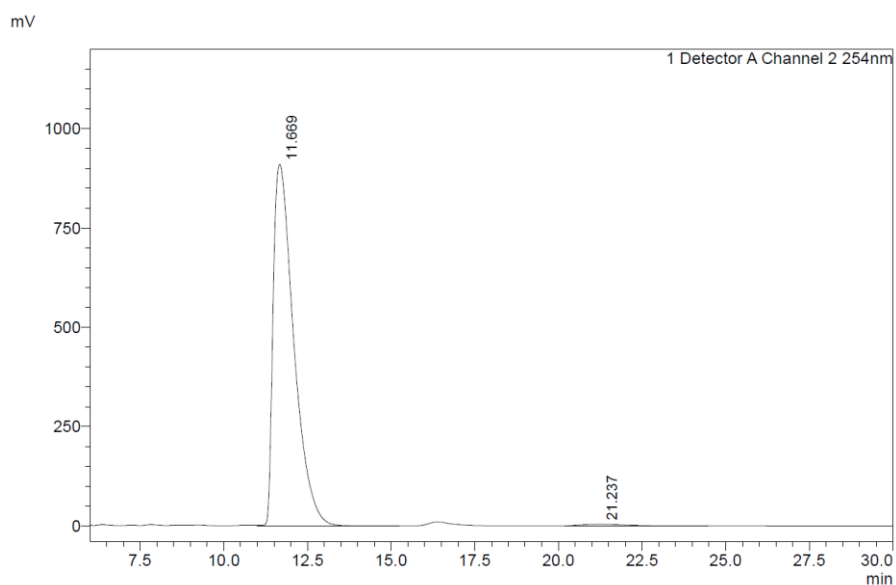

| Detector A Channel 2 254nm |           |         |
|----------------------------|-----------|---------|
| Peak#                      | Ret. Time | Area%   |
| 1                          | 11.669    | 99.147  |
| 2                          | 21.237    | 0.853   |
| Total                      |           | 100.000 |

HPLC Data for **29**<sub>minor</sub>: Chiralpak AD-H (90:10 hexane : IPA, flow rate 1.00 mLmin<sup>-1</sup>, 254 nm, 30 °C)  
 t<sub>R</sub> (minor): 23.4 min, t<sub>R</sub> (major): 28.4 min, 95:5 er.

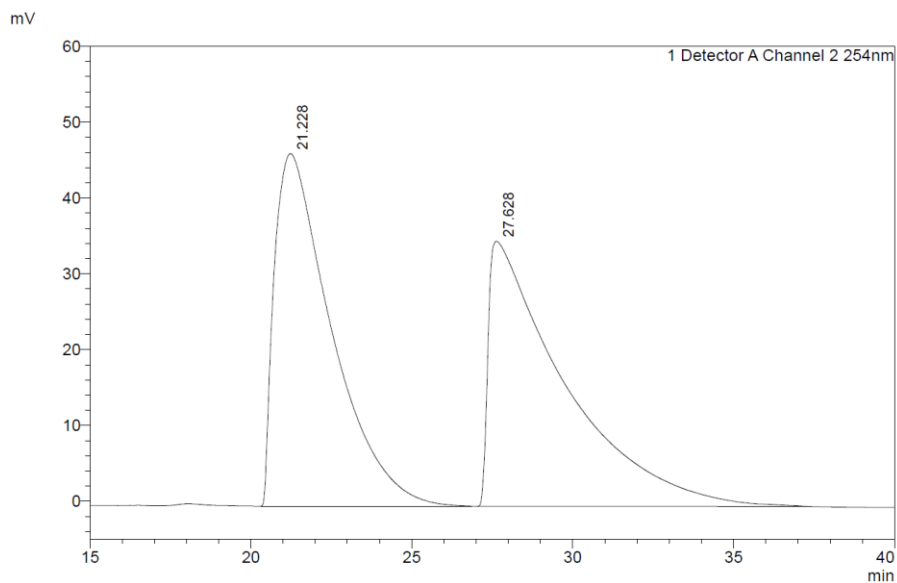

| Detector A Channel 2 254nm |           |         |
|----------------------------|-----------|---------|
| Peak#                      | Ret. Time | Area%   |
| 1                          | 21.228    | 50.116  |
| 2                          | 27.628    | 49.884  |
| Total                      |           | 100.000 |

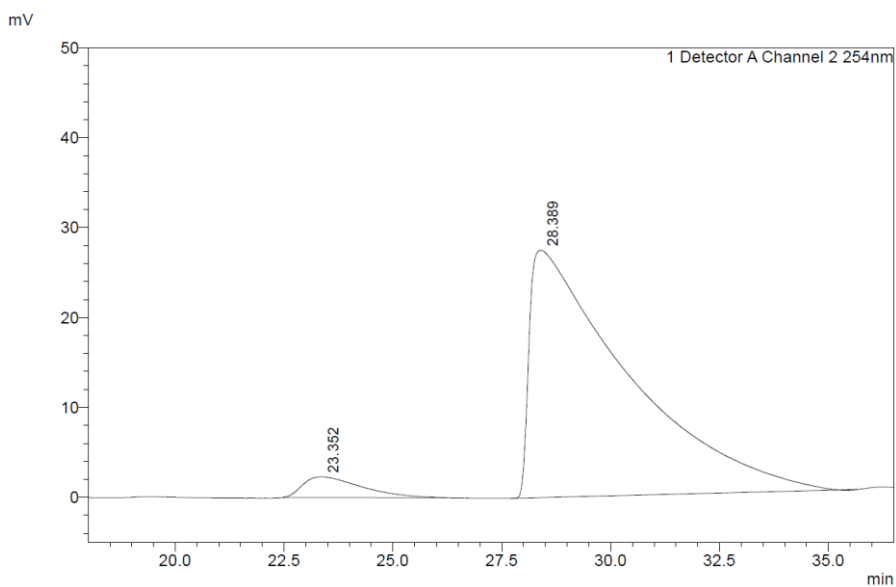

| Detector A Channel 2 254nm |           |         |
|----------------------------|-----------|---------|
| Peak#                      | Ret. Time | Area%   |
| 1                          | 23.352    | 4.717   |
| 2                          | 28.389    | 95.283  |
| Total                      |           | 100.000 |

HPLC Data for **30**<sub>major</sub>: Chiralpak AD-H (85:15 hexane : IPA, flow rate 1.00 mLmin<sup>-1</sup>, 254 nm, 30 °C)  
 t<sub>R</sub> (major): 10.3 min, t<sub>R</sub> (minor): 24.3 min, 97:3 er.

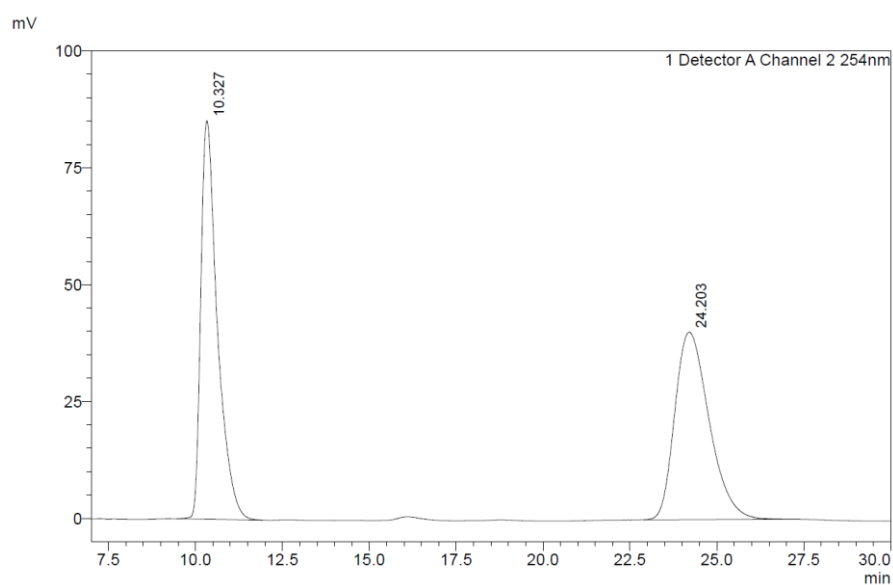

Detector A Channel 2 254nm

| Peak# | Ret. Time | Area%   |
|-------|-----------|---------|
| 1     | 10.327    | 50.613  |
| 2     | 24.203    | 49.387  |
| Total |           | 100.000 |

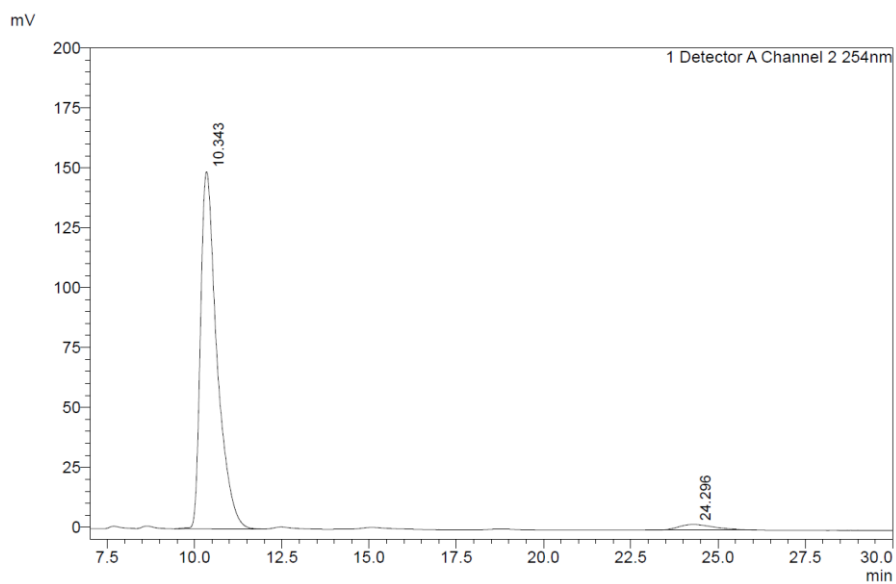

Detector A Channel 2 254nm

| Peak# | Ret. Time | Area%   |
|-------|-----------|---------|
| 1     | 10.343    | 96.715  |
| 2     | 24.296    | 3.285   |
| Total |           | 100.000 |

HPLC Data for **30<sub>minor</sub>**: Chiralcel OD-H (97:3 hexane : IPA, flow rate 1.00 mLmin<sup>-1</sup>, 254 nm, 30 °C) t<sub>R</sub>  
 (major): 16.2 min, t<sub>R</sub> (minor): 26.1 min, 97:3 er.

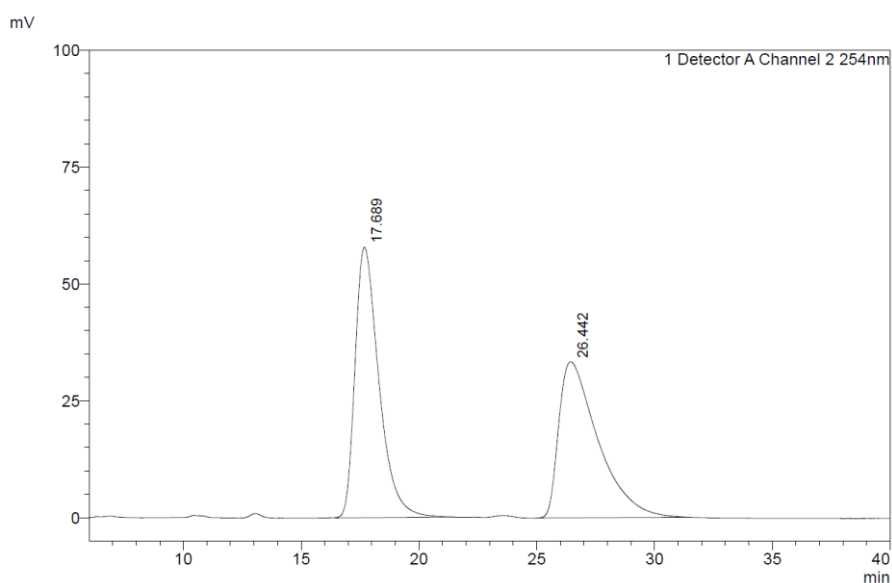

Detector A Channel 2 254nm

| Peak# | Ret. Time | Area%   |
|-------|-----------|---------|
| 1     | 17.689    | 50.905  |
| 2     | 26.442    | 49.095  |
| Total |           | 100.000 |

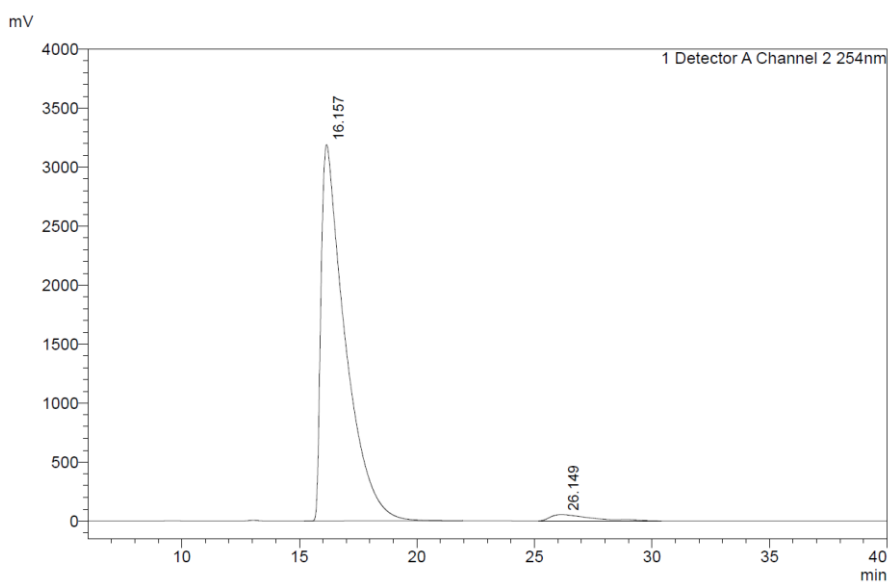

Detector A Channel 2 254nm

| Peak# | Ret. Time | Area%   |
|-------|-----------|---------|
| 1     | 16.157    | 97.236  |
| 2     | 26.149    | 2.764   |
| Total |           | 100.000 |



HPLC Data for **31**<sub>major</sub>: Chiralcel AD-H (90:10 hexane : IPA, flow rate 1.00 mLmin<sup>-1</sup>, 254 nm, 30 °C) t<sub>R</sub>  
(major): 11.2 min, t<sub>R</sub> (minor): 22.8 min, 99:1 er.

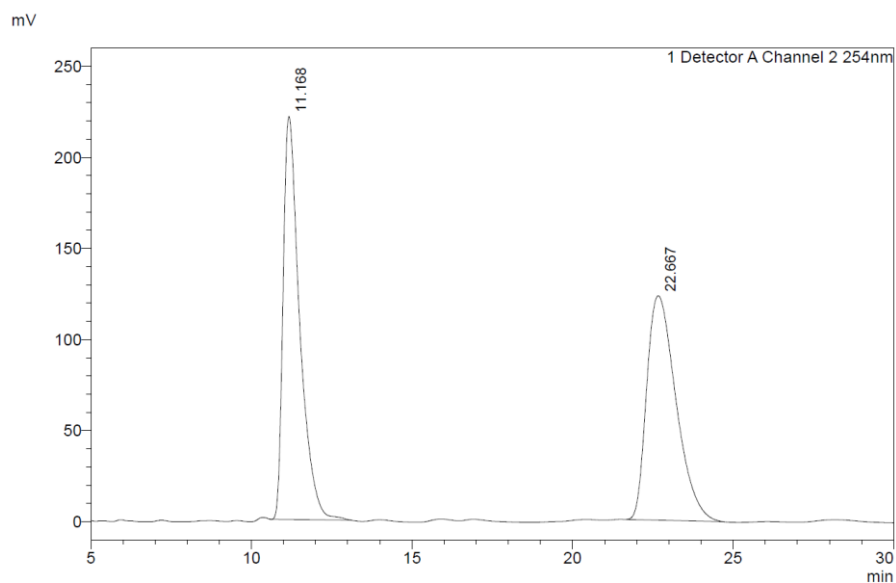

| Detector A Channel 2 254nm |           |         |
|----------------------------|-----------|---------|
| Peak#                      | Ret. Time | Area%   |
| 1                          | 11.168    | 50.326  |
| 2                          | 22.667    | 49.674  |
| Total                      |           | 100.000 |

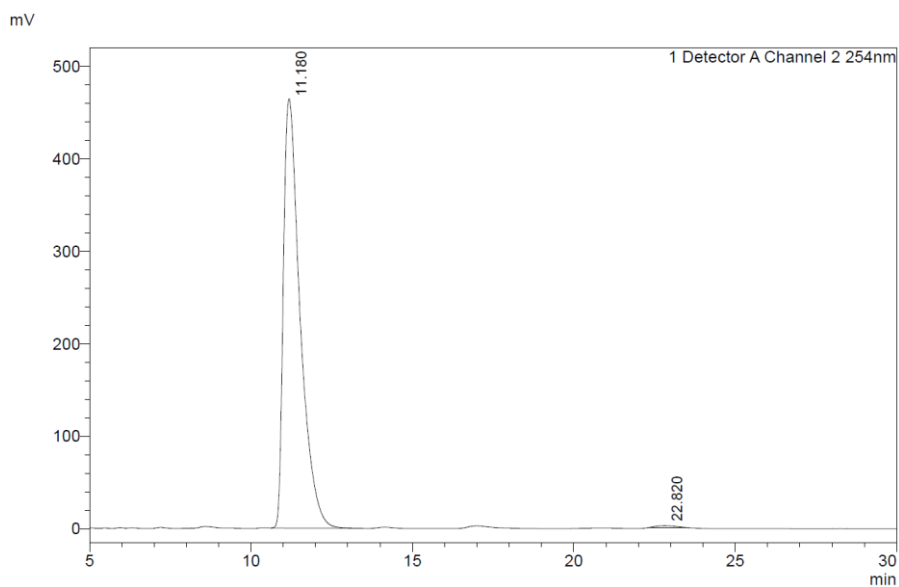

| Detector A Channel 2 254nm |           |         |
|----------------------------|-----------|---------|
| Peak#                      | Ret. Time | Area%   |
| 1                          | 11.180    | 99.375  |
| 2                          | 22.820    | 0.625   |
| Total                      |           | 100.000 |

HPLC Data for **31**<sub>minor</sub>: Chiralcel OD-H (95:5 hexane : IPA, flow rate 1.00 mLmin<sup>-1</sup>, 254 nm, 30 °C) t<sub>R</sub>  
 (major): 11.8 min, t<sub>R</sub> (minor): 20.8 min, 96:4 ee.

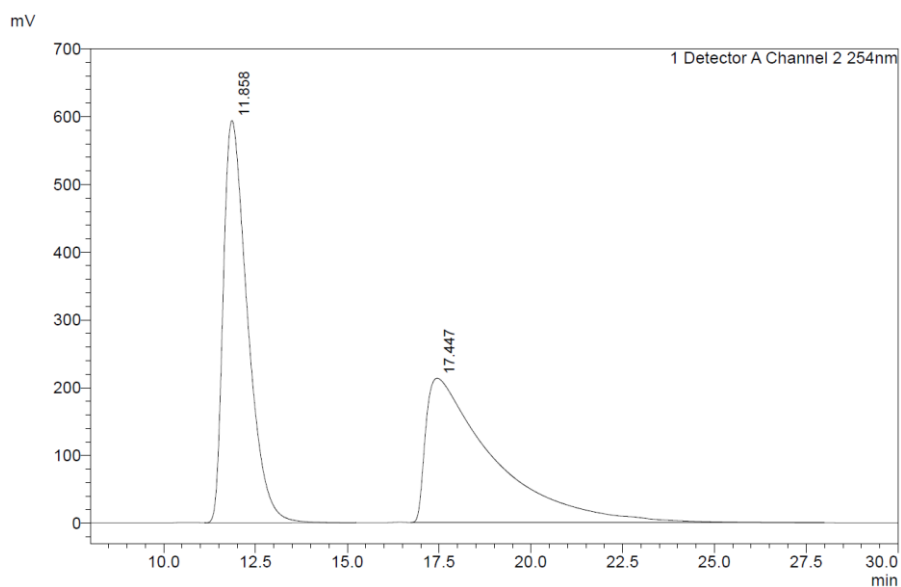

| Detector A Channel 2 254nm |           |         |
|----------------------------|-----------|---------|
| Peak#                      | Ret. Time | Area%   |
| 1                          | 11.858    | 49.758  |
| 2                          | 17.447    | 50.242  |
| Total                      |           | 100.000 |

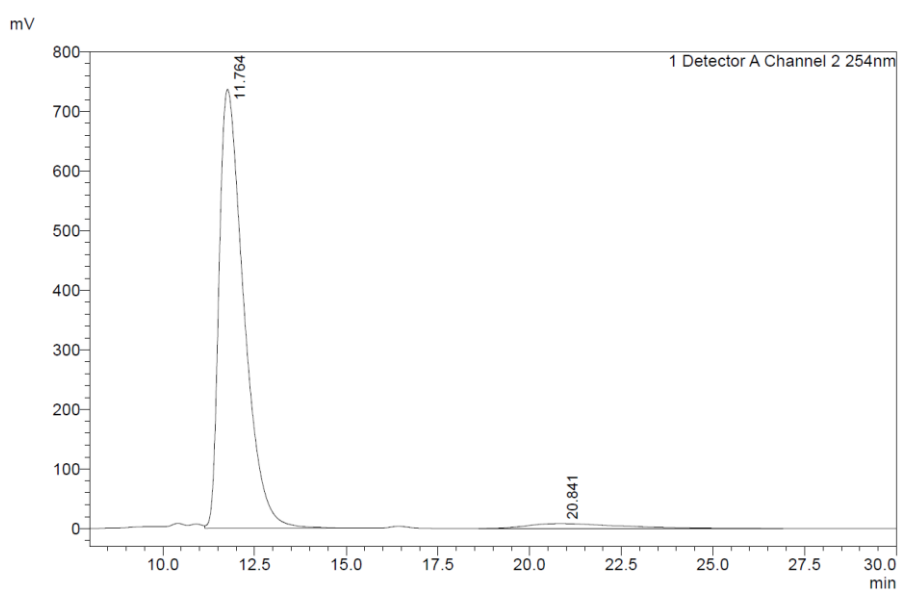

| Detector A Channel 2 254nm |           |         |
|----------------------------|-----------|---------|
| Peak#                      | Ret. Time | Area%   |
| 1                          | 11.764    | 96.107  |
| 2                          | 20.841    | 3.893   |
| Total                      |           | 100.000 |

HPLC Data for **32**<sub>major</sub>: Chiralpak AD-H (90:10 hexane : IPA, flow rate 1.00 mLmin<sup>-1</sup>, 254 nm, 30 °C)  
 t<sub>R</sub> (major): 15.8 min, t<sub>R</sub> (minor): 21.4 min, 95:5 er.

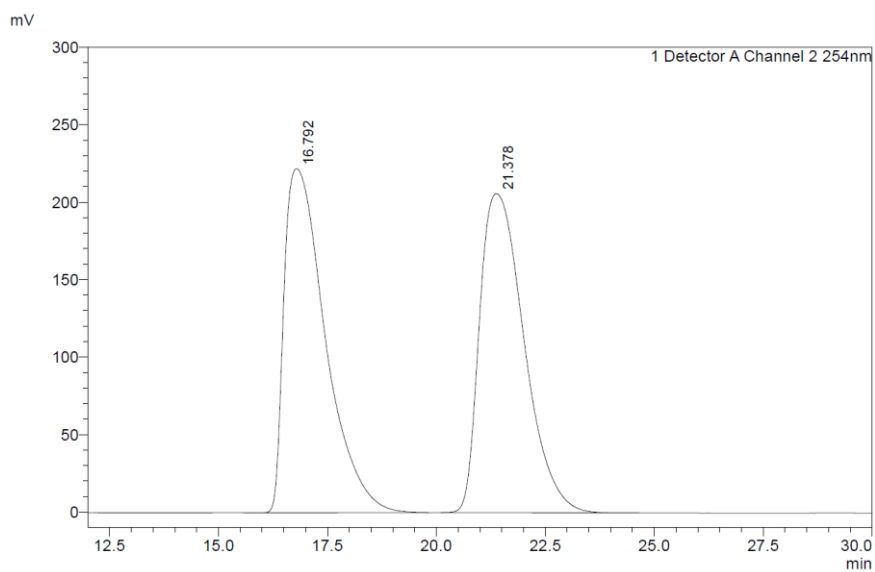

| Detector A Channel 2 254nm |           |         |
|----------------------------|-----------|---------|
| Peak#                      | Ret. Time | Area%   |
| 1                          | 16.792    | 50.017  |
| 2                          | 21.378    | 49.983  |
| Total                      |           | 100.000 |

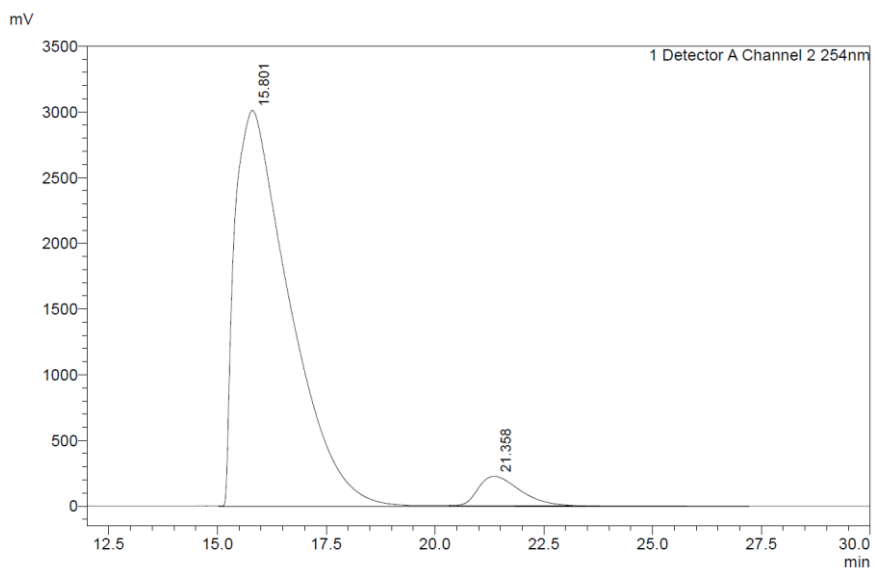

| Detector A Channel 2 254nm |           |         |
|----------------------------|-----------|---------|
| Peak#                      | Ret. Time | Area%   |
| 1                          | 15.801    | 94.679  |
| 2                          | 21.358    | 5.321   |
| Total                      |           | 100.000 |

HPLC Data for **32**<sub>minor</sub>: Chiralpak AD-H (93:7 hexane : IPA, flow rate 1.00 mLmin<sup>-1</sup>, 254 nm, 30 °C) t<sub>R</sub> (minor): 22.3 min, t<sub>R</sub> (major): 26.1 min, 96:4 er.

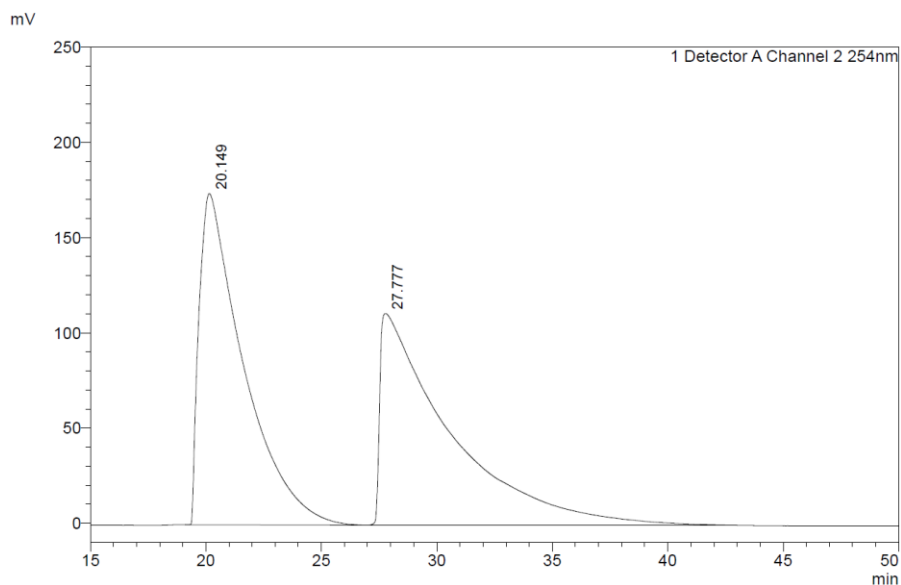

| Detector A Channel 2 254nm |           |         |
|----------------------------|-----------|---------|
| Peak#                      | Ret. Time | Area%   |
| 1                          | 20.149    | 49.879  |
| 2                          | 27.777    | 50.121  |
| Total                      |           | 100.000 |

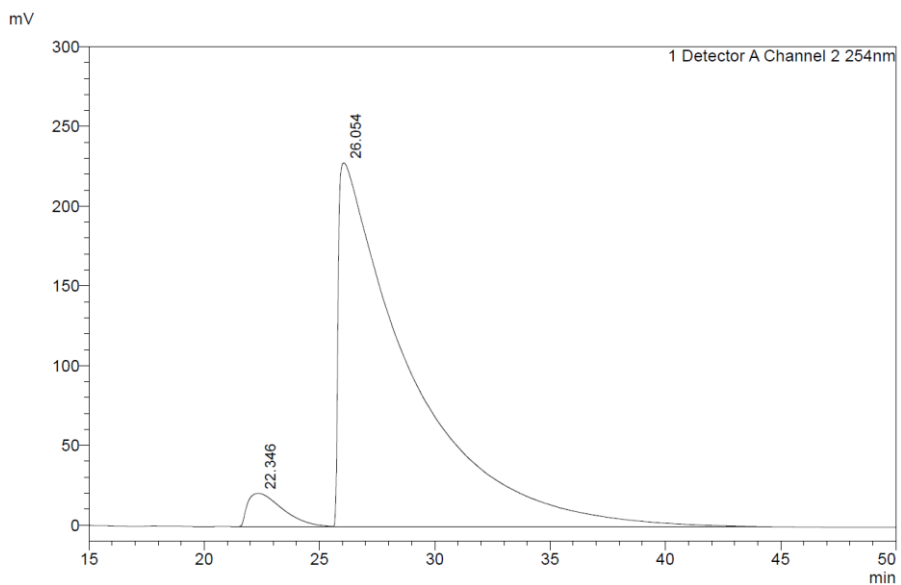

| Detector A Channel 2 254nm |           |         |
|----------------------------|-----------|---------|
| Peak#                      | Ret. Time | Area%   |
| 1                          | 22.346    | 4.297   |
| 2                          | 26.054    | 95.703  |
| Total                      |           | 100.000 |

HPLC Data for **33**<sub>major</sub>: Chiralcel OD-H (90:10 hexane : IPA, flow rate 1.00 mLmin<sup>-1</sup>, 254 nm, 30 °C) t<sub>R</sub>  
 (minor): 19.0 min, t<sub>R</sub> (major): 34.1 min, 94:6 er.

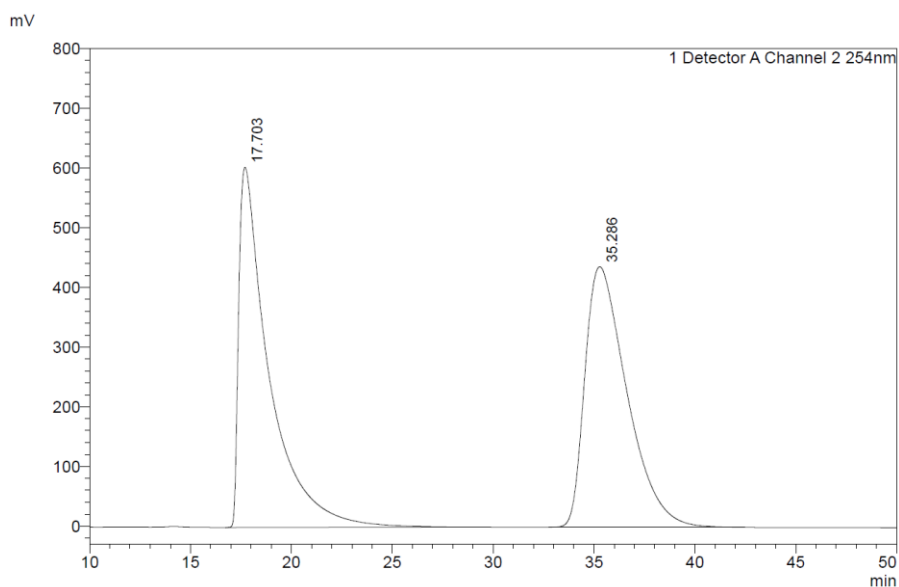

Detector A Channel 2 254nm

| Peak# | Ret. Time | Area%   |
|-------|-----------|---------|
| 1     | 17.703    | 49.744  |
| 2     | 35.286    | 50.256  |
| Total |           | 100.000 |

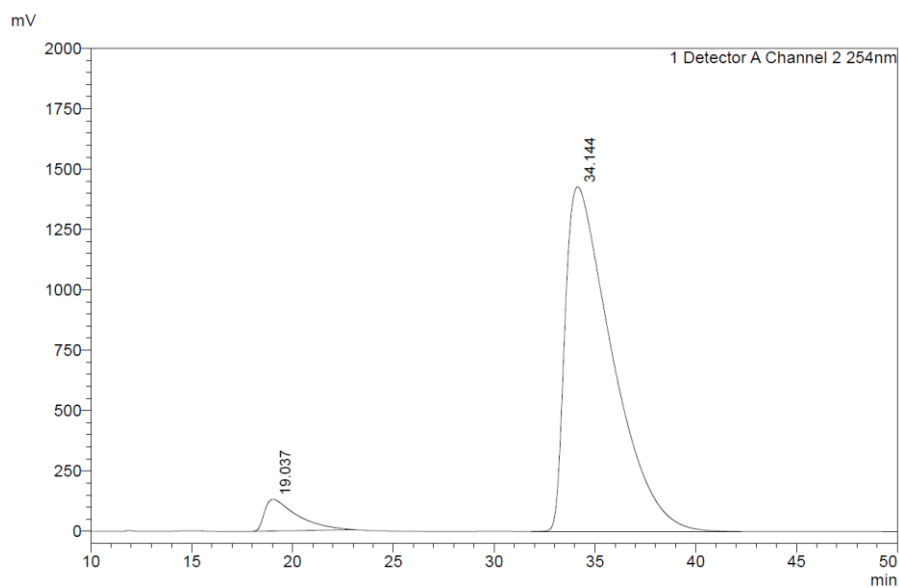

Detector A Channel 2 254nm

| Peak# | Ret. Time | Area%   |
|-------|-----------|---------|
| 1     | 19.037    | 5.995   |
| 2     | 34.144    | 94.005  |
| Total |           | 100.000 |

HPLC Data for **33**<sub>minor</sub>: Chiralcel OD-H (97:3 hexane : IPA, flow rate 1.00 mLmin<sup>-1</sup>, 254 nm, 30 °C) t<sub>R</sub>  
 (major): 23.6 min, t<sub>R</sub> (minor): 47.2 min, 97:3 er.

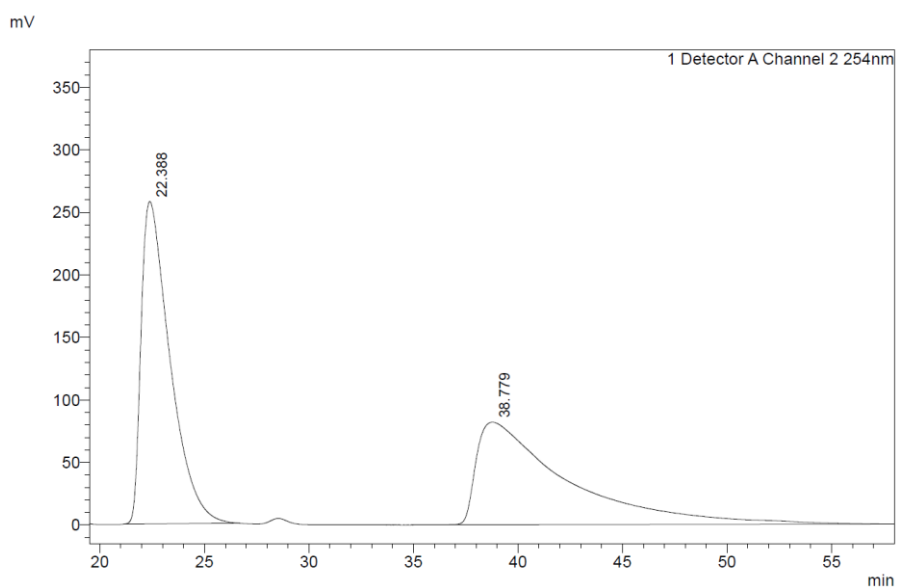

| Detector A Channel 2 254nm |           |         |
|----------------------------|-----------|---------|
| Peak#                      | Ret. Time | Area%   |
| 1                          | 22.388    | 50.304  |
| 2                          | 38.779    | 49.696  |
| Total                      |           | 100.000 |

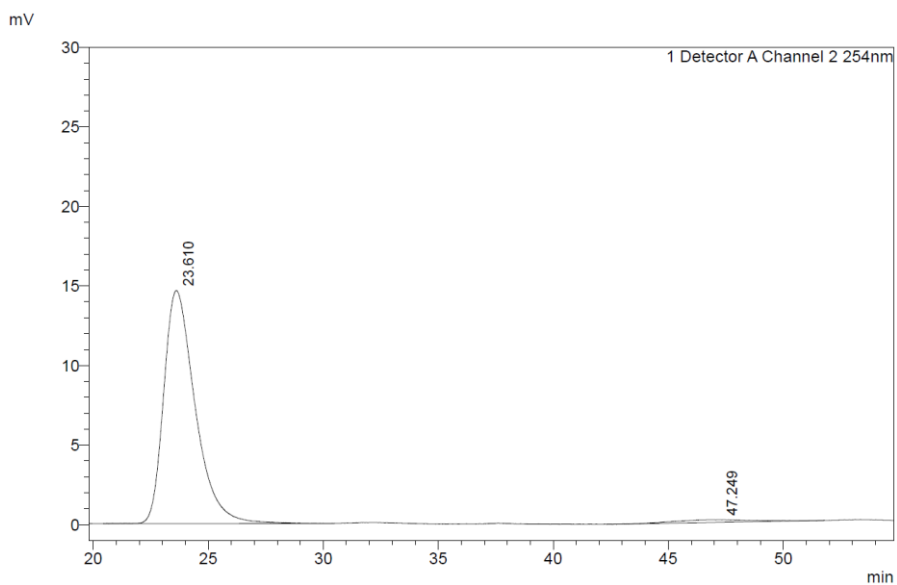

| Detector A Channel 2 254nm |           |         |
|----------------------------|-----------|---------|
| Peak#                      | Ret. Time | Area%   |
| 1                          | 23.610    | 97.156  |
| 2                          | 47.249    | 2.844   |
| Total                      |           | 100.000 |

HPLC Data for **34**<sub>major</sub>: Chiralcel OD-H (90:10 hexane : IPA, flow rate 1.00 mLmin<sup>-1</sup>, 254 nm, 30 °C) t<sub>R</sub>  
 (minor): 41.3 min, t<sub>R</sub> (major): 91.5 min, 92:8 er.

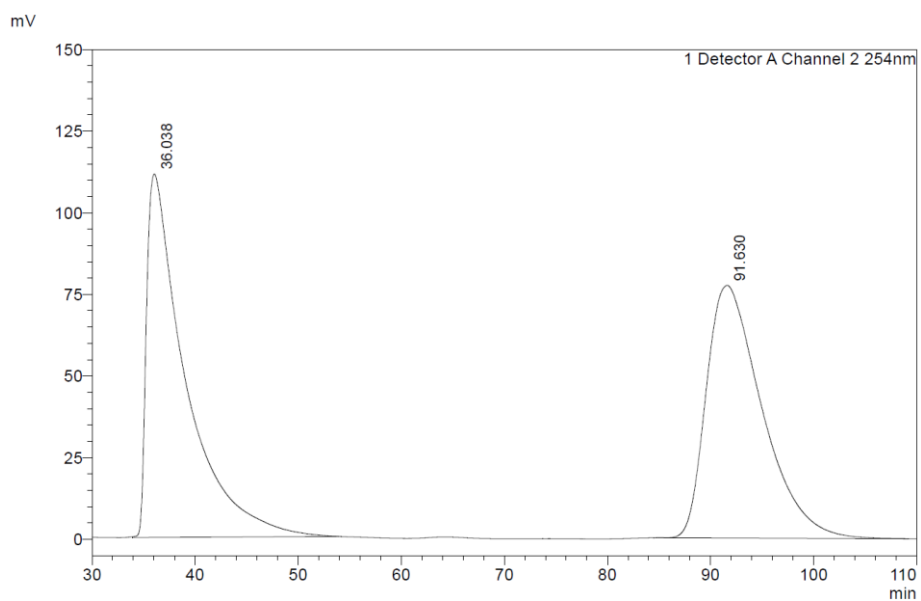

| Peak# | Ret. Time | Area%   |
|-------|-----------|---------|
| 1     | 36.038    | 49.946  |
| 2     | 91.630    | 50.054  |
| Total |           | 100.000 |

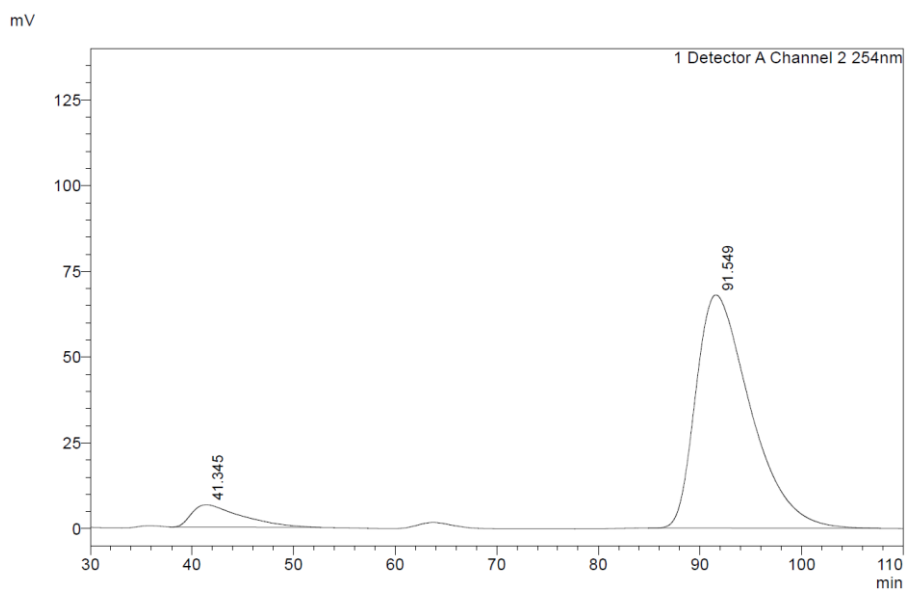

| Peak# | Ret. Time | Area%   |
|-------|-----------|---------|
| 1     | 41.345    | 8.047   |
| 2     | 91.549    | 91.953  |
| Total |           | 100.000 |

HPLC Data for **34**<sub>minor</sub>: Chiralcel OD-H (90:10 hexane : IPA, flow rate 1.00 mLmin<sup>-1</sup>, 254 nm, 30 °C) t<sub>R</sub>  
 (major): 14.1 min, t<sub>R</sub> (minor): 20.4 min, 96:4 er.

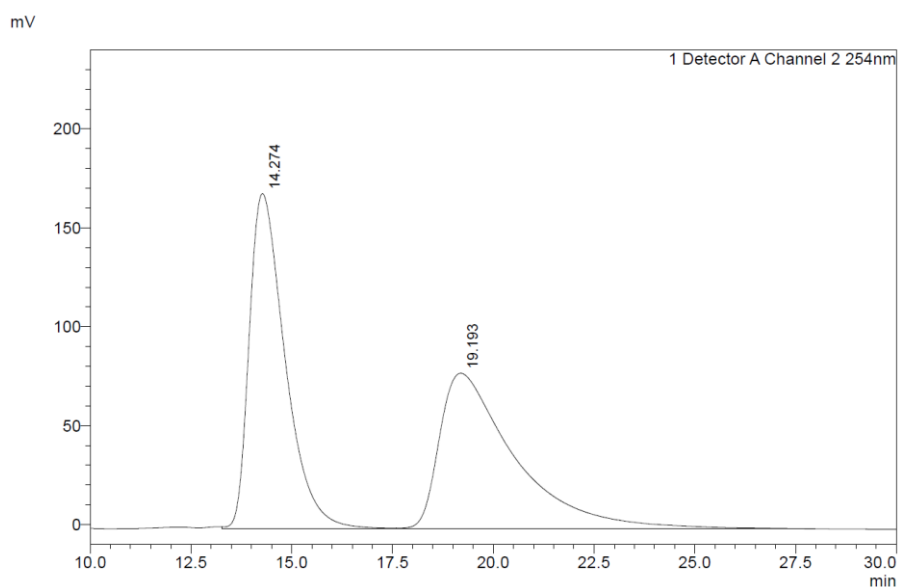

Detector A Channel 2 254nm

| Peak# | Ret. Time | Area%   |
|-------|-----------|---------|
| 1     | 14.274    | 50.601  |
| 2     | 19.193    | 49.399  |
| Total |           | 100.000 |

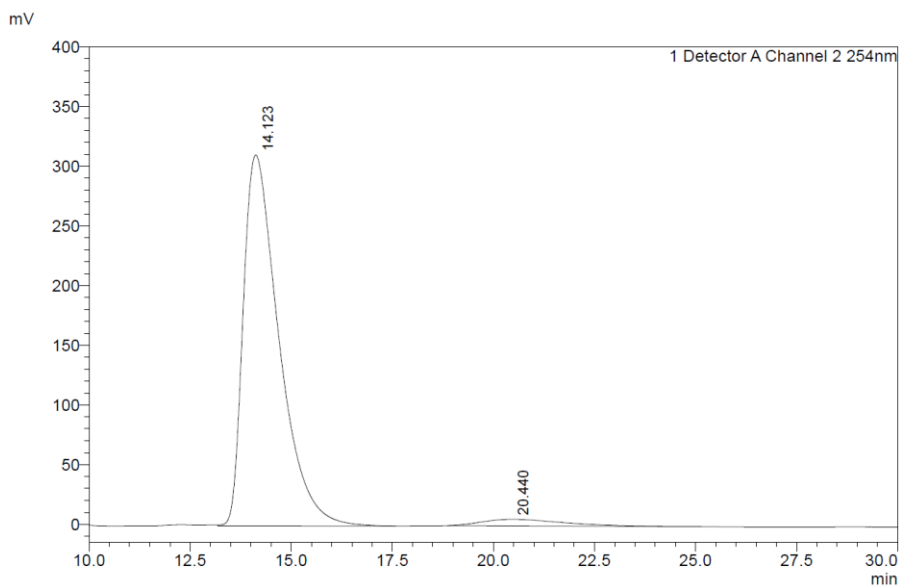

Detector A Channel 2 254nm

| Peak# | Ret. Time | Area%   |
|-------|-----------|---------|
| 1     | 14.123    | 96.226  |
| 2     | 20.440    | 3.774   |
| Total |           | 100.000 |



HPLC Data for **35**<sub>major</sub>: Chiralcel OD-H (90:10 hexane : IPA, flow rate 1.00 mLmin<sup>-1</sup>, 254 nm, 30 °C) t<sub>R</sub>  
 (major): 14.9 min, t<sub>R</sub> (minor): 67.9 min, 95:5 er.

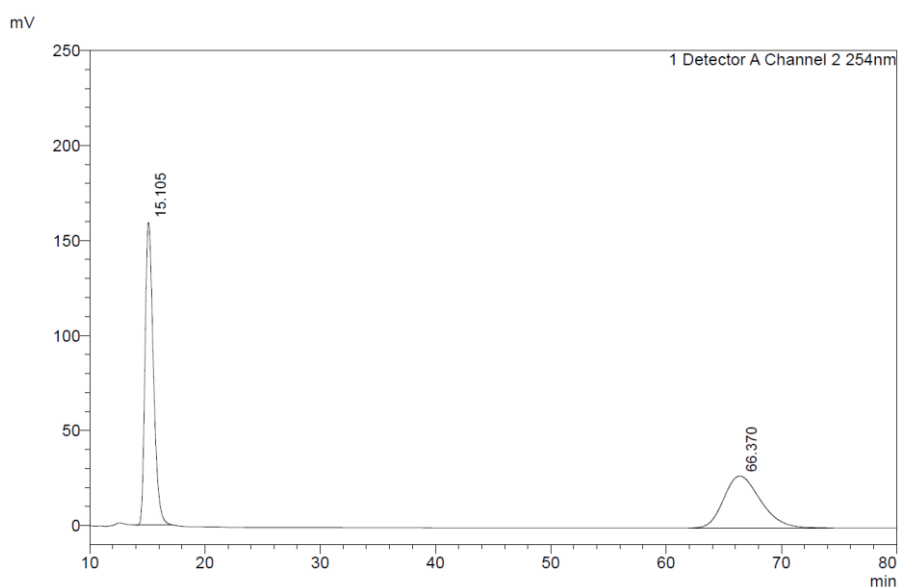

Detector A Channel 2 254nm

| Peak# | Ret. Time | Area%   |
|-------|-----------|---------|
| 1     | 15.105    | 51.337  |
| 2     | 66.370    | 48.663  |
| Total |           | 100.000 |

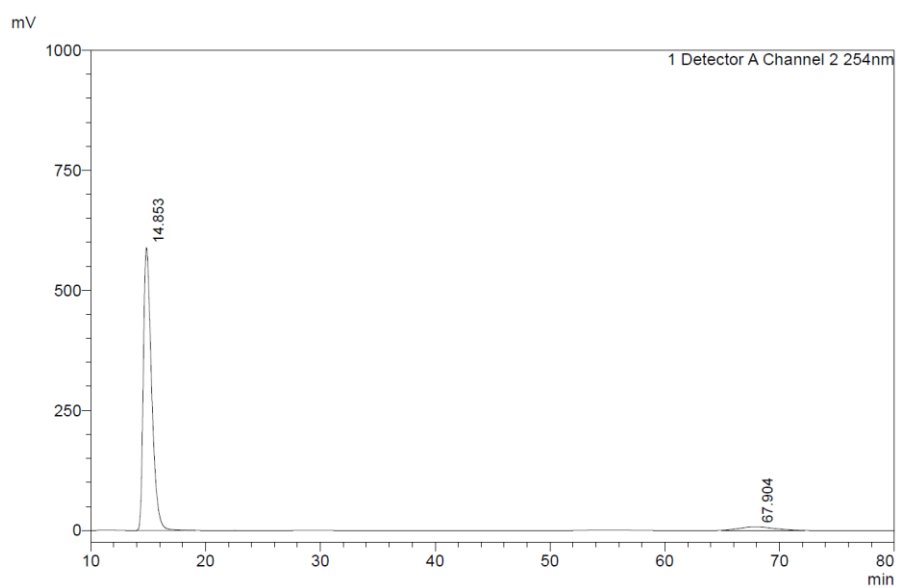

Detector A Channel 2 254nm

| Peak# | Ret. Time | Area%   |
|-------|-----------|---------|
| 1     | 14.853    | 95.289  |
| 2     | 67.904    | 4.711   |
| Total |           | 100.000 |

HPLC Data for **35**<sub>minor</sub>: Chiralpak AD-H (95:5 hexane : IPA, flow rate 1.00 mLmin<sup>-1</sup>, 254 nm, 30 °C) t<sub>R</sub> (major): 29.0 min, t<sub>R</sub> (minor): 51.1 min, 94:6 er.

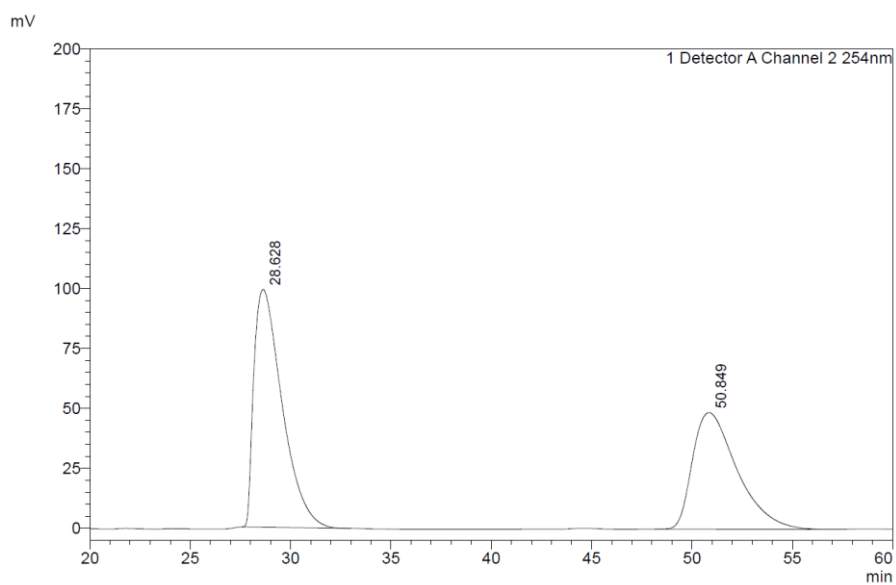

Detector A Channel 2 254nm

| Peak# | Ret. Time | Area%   |
|-------|-----------|---------|
| 1     | 28.628    | 50.799  |
| 2     | 50.849    | 49.201  |
| Total |           | 100.000 |

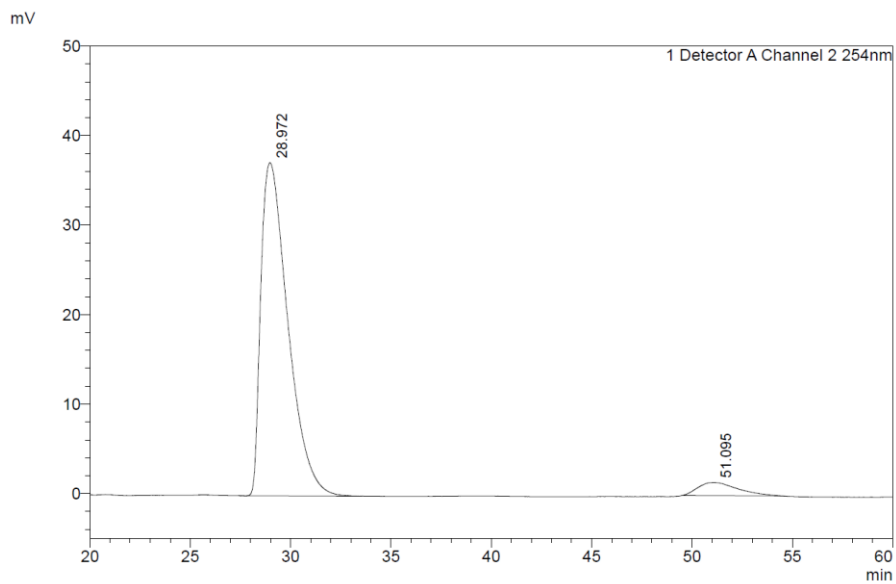

HPLC Data for **13**: Chiralcel OD-H (95:5 hexane : IPA, flow rate 1.00 mL.min<sup>-1</sup>, 254 nm, 30 °C) t<sub>R</sub> (major): 9.7 min, t<sub>R</sub> (minor): 13.5 min, 98:2 er.

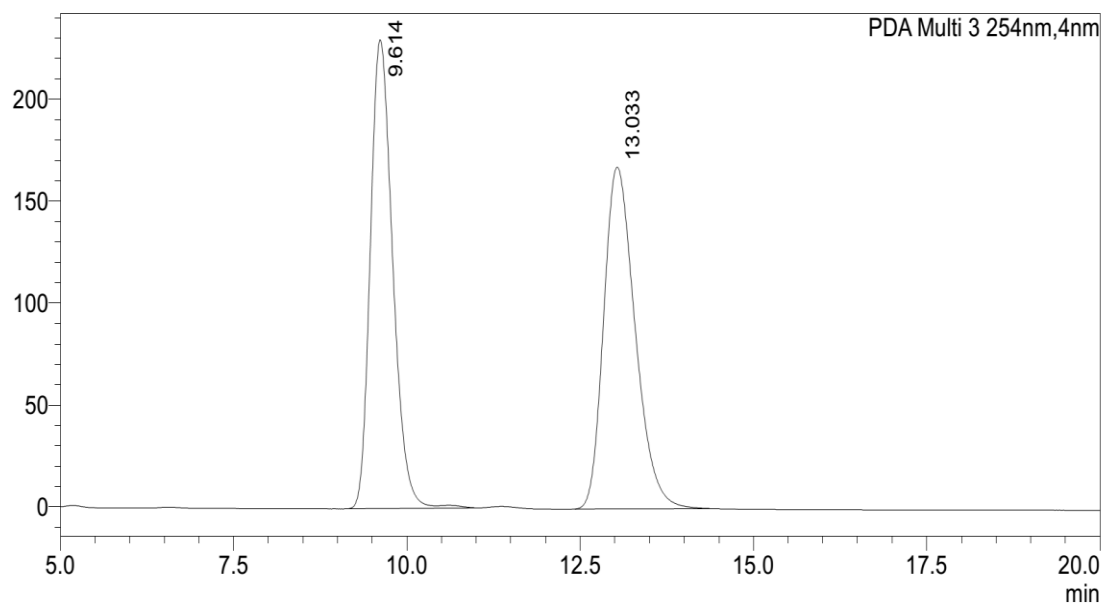

| Peak# | Ret. Time | Area%   |
|-------|-----------|---------|
| 1     | 9.614     | 49.376  |
| 2     | 13.033    | 50.624  |
| Total |           | 100.000 |

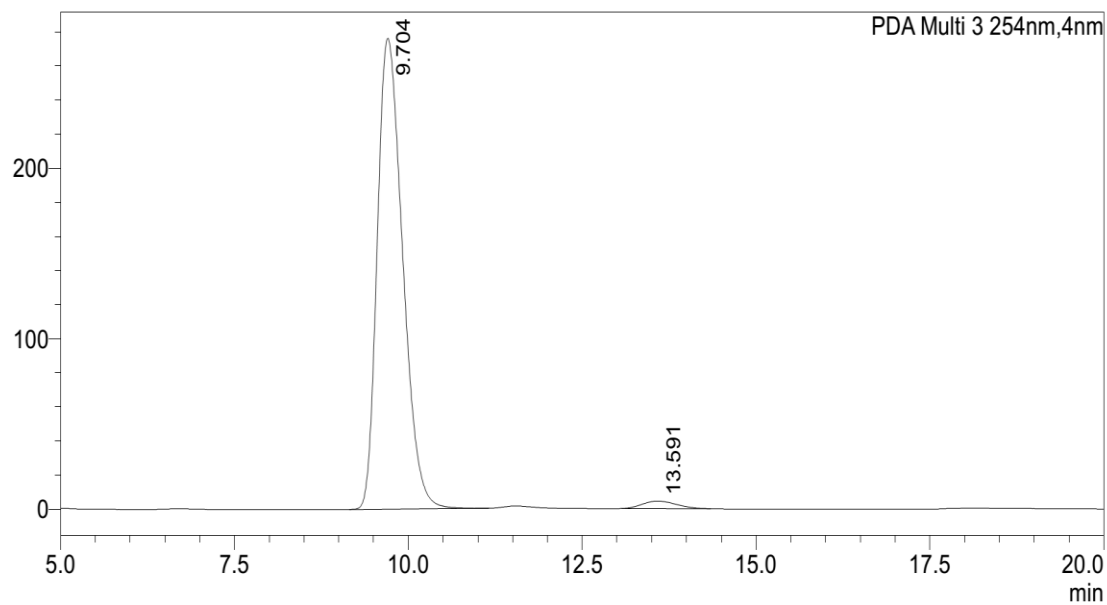

| Peak# | Ret. Time | Area%   |
|-------|-----------|---------|
| 1     | 9.704     | 97.864  |
| 2     | 13.591    | 2.136   |
| Total |           | 100.000 |

HPLC Data for **53**: Chiralcel OD-H (93:7 hexane : IPA, flow rate 1.00 mL.min<sup>-1</sup>, 254 nm, 30 °C) t<sub>R</sub> (major): 26.1 min, t<sub>R</sub> (minor): 39.4 min, 98:2 er.

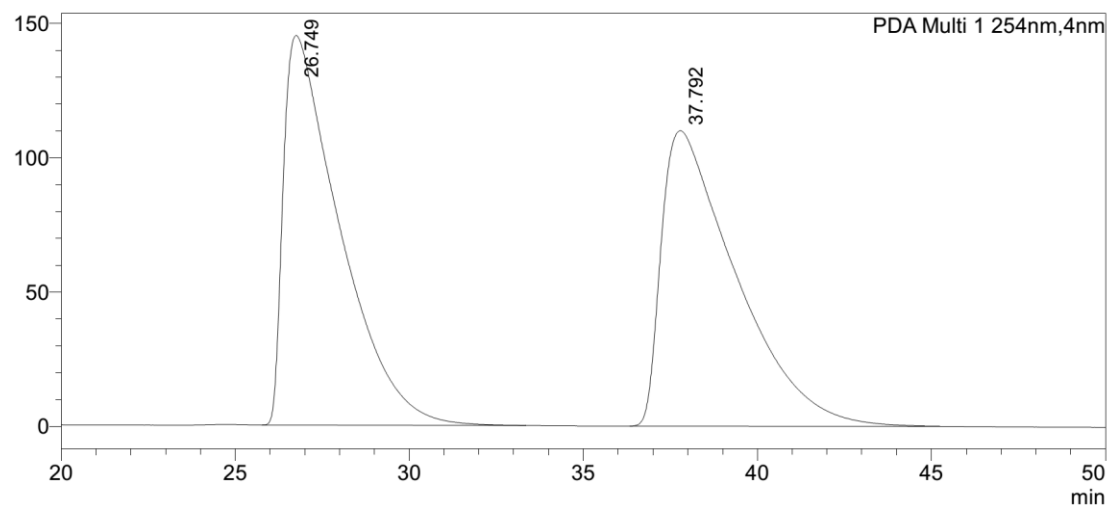

| Peak# | Ret. Time | Area%   |
|-------|-----------|---------|
| 1     | 26.749    | 49.858  |
| 2     | 37.792    | 50.142  |
| Total |           | 100.000 |

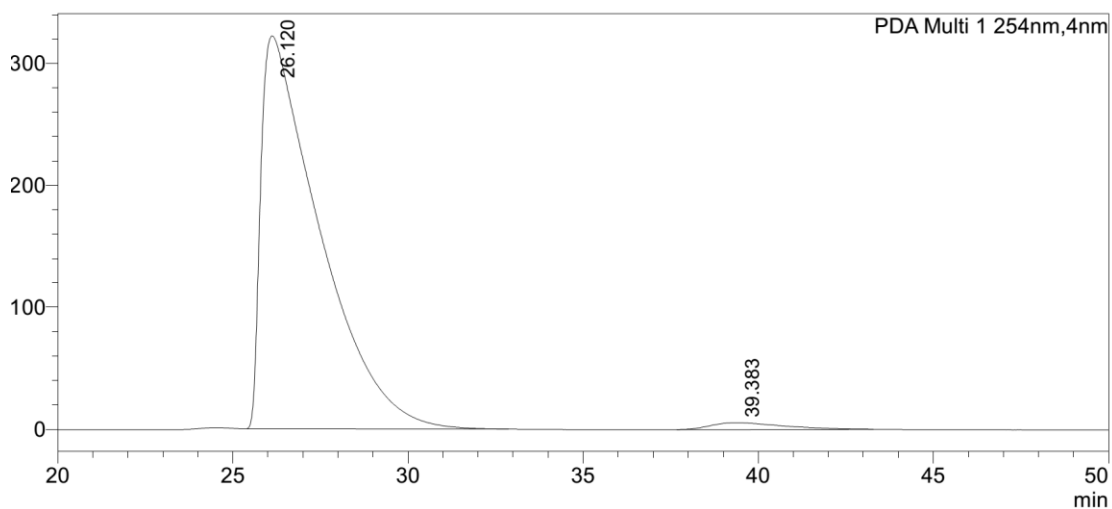

| Peak# | Ret. Time | Area%   |
|-------|-----------|---------|
| 1     | 26.120    | 97.942  |
| 2     | 39.383    | 2.058   |
| Total |           | 100.000 |

HPLC Data for **54**: Chiralcel AS-H (96.5:3.5 hexane : IPA, flow rate 1.00 mL.min<sup>-1</sup>, 254 nm, 30 °C) t<sub>R</sub>  
(major): 20.2 min, t<sub>R</sub> (minor): 26.6 min, 98:2 er.

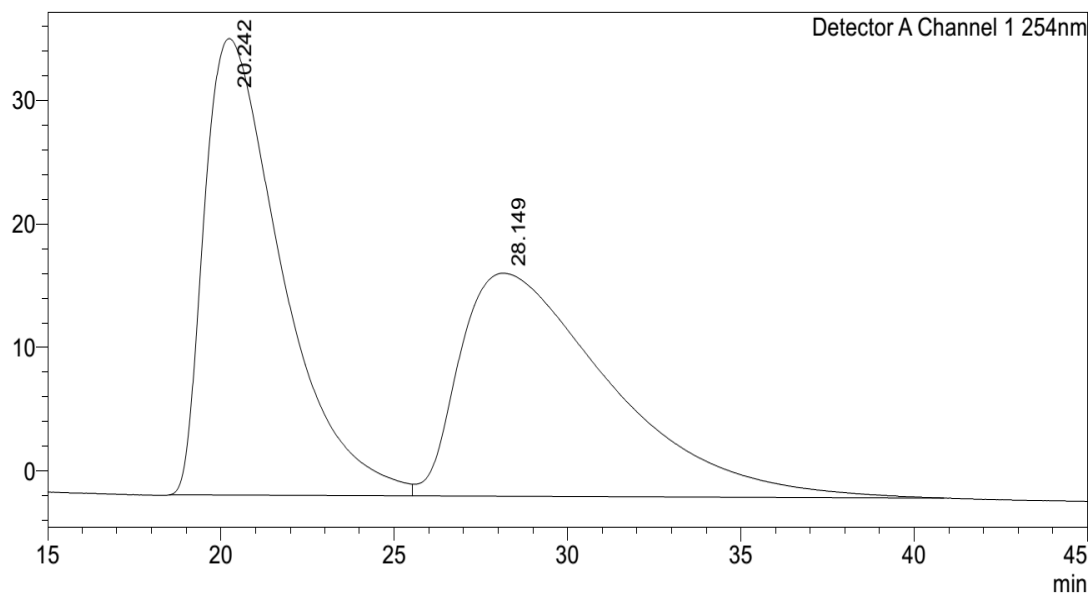

| Peak# | Ret. Time | Area%   |
|-------|-----------|---------|
| 1     | 20.242    | 51.186  |
| 2     | 28.149    | 48.814  |
| Total |           | 100.000 |

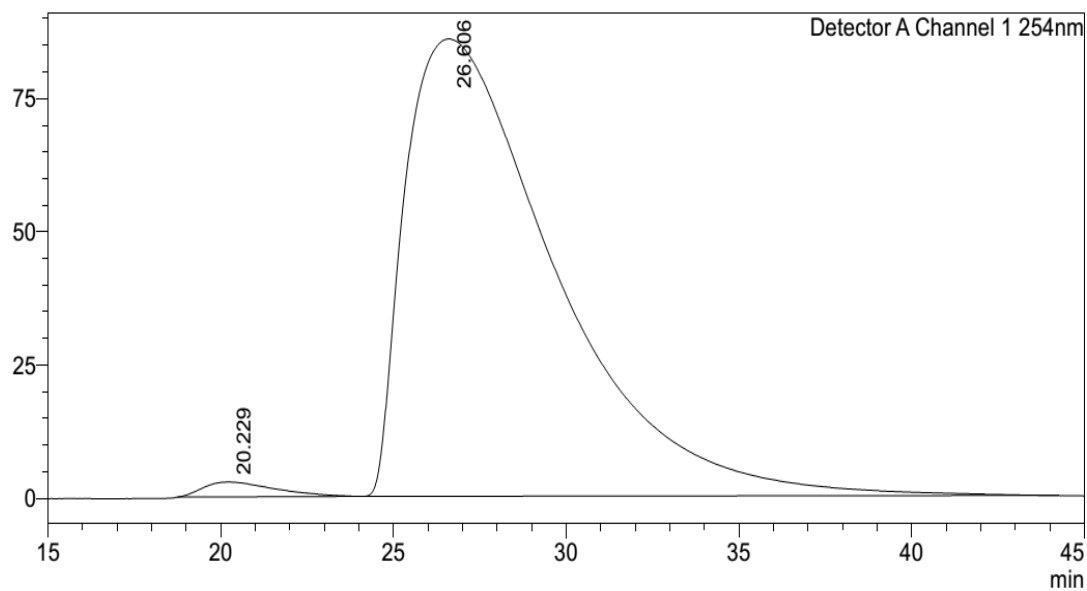

| Peak# | Ret. Time | Area%   |
|-------|-----------|---------|
| 1     | 20.229    | 1.526   |
| 2     | 26.606    | 98.474  |
| Total |           | 100.000 |

HPLC Data for **55**: Chiralcel OD-H (93:7 hexane : IPA, flow rate 1.00 mL.min<sup>-1</sup>, 254 nm, 30 °C) t<sub>R</sub> (major): 34.5 min, t<sub>R</sub> (minor): 48.7 min, >99:1 er.

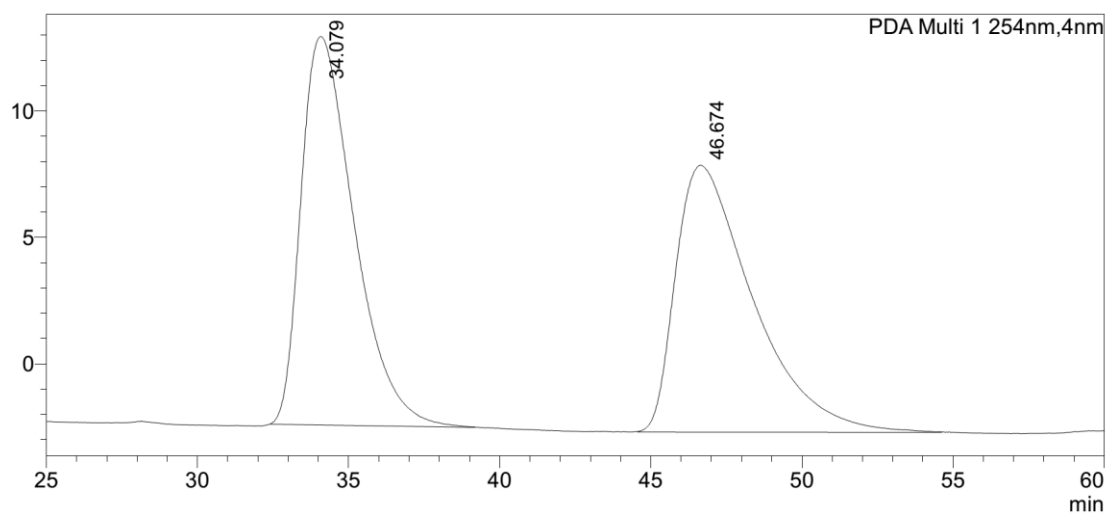

| Peak# | Ret. Time | Area%   |
|-------|-----------|---------|
| 1     | 34.079    | 50.135  |
| 2     | 46.674    | 49.865  |
| Total |           | 100.000 |

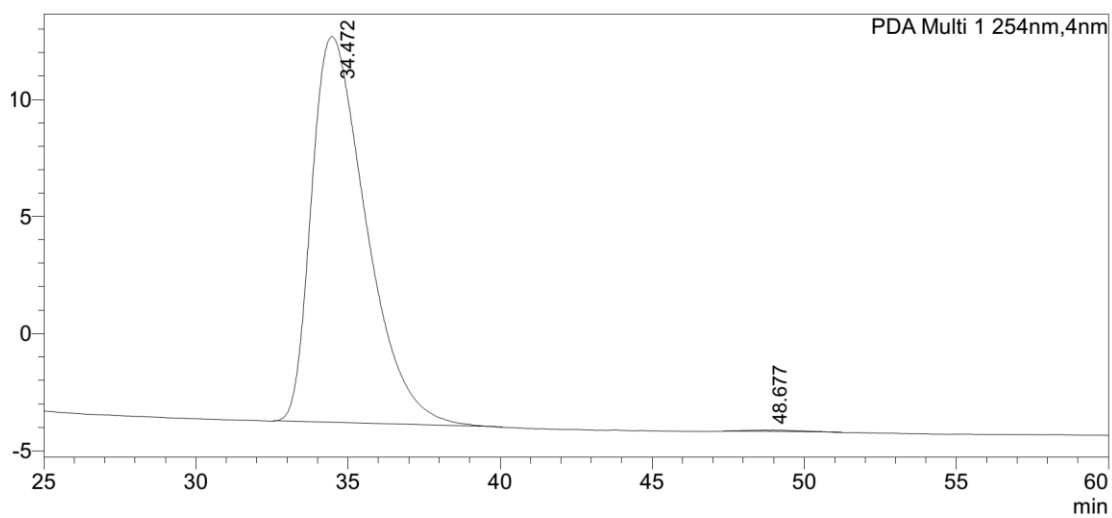

| Peak# | Ret. Time | Area%   |
|-------|-----------|---------|
| 1     | 34.472    | 99.544  |
| 2     | 48.677    | 0.456   |
| Total |           | 100.000 |

HPLC Data for **56**: Chiralcel OD-H (90:10 hexane : IPA, flow rate 1.00 mL.min<sup>-1</sup>, 254 nm, 30 °C) t<sub>R</sub> (minor): 14.3 min, t<sub>R</sub> (major): 22.2 min, 2:98 er.

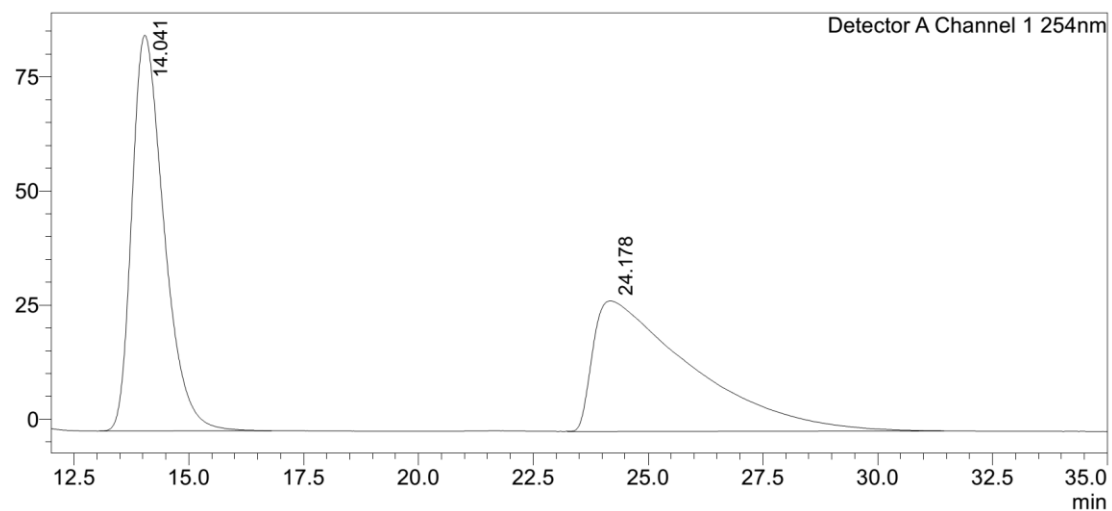

| Peak# | Ret. Time | Area%   |
|-------|-----------|---------|
| 1     | 14.041    | 49.805  |
| 2     | 24.178    | 50.195  |
| Total |           | 100.000 |

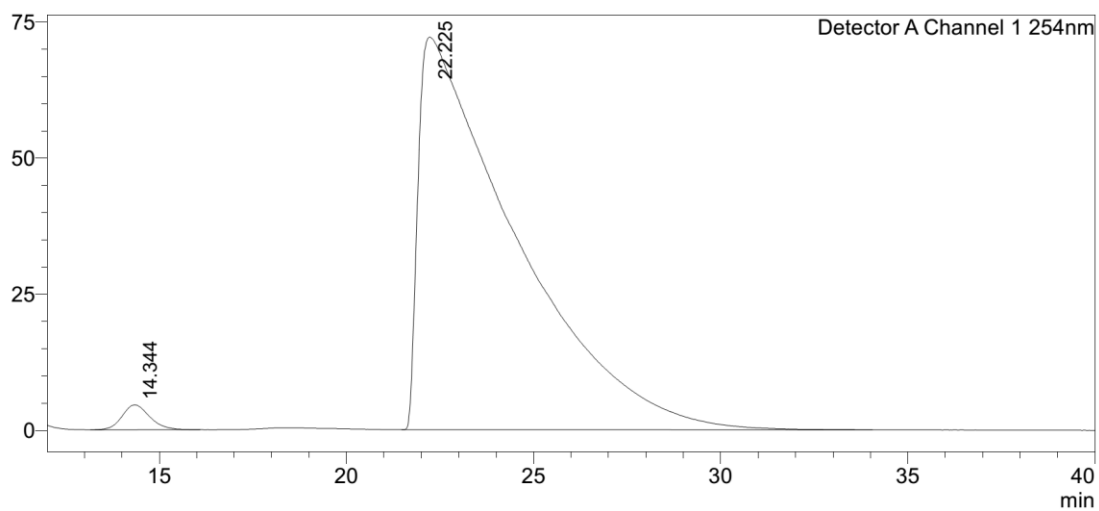

| Peak# | Ret. Time | Area%   |
|-------|-----------|---------|
| 1     | 14.344    | 1.784   |
| 2     | 22.225    | 98.216  |
| Total |           | 100.000 |

HPLC Data for **57**: Chiralcel OD-H (93:7 hexane : IPA, flow rate 1.00 mL.min<sup>-1</sup>, 254 nm, 30 °C) t<sub>R</sub> (minor): 30.5 min, t<sub>R</sub> (major): 34.3 min, 2:98 er.

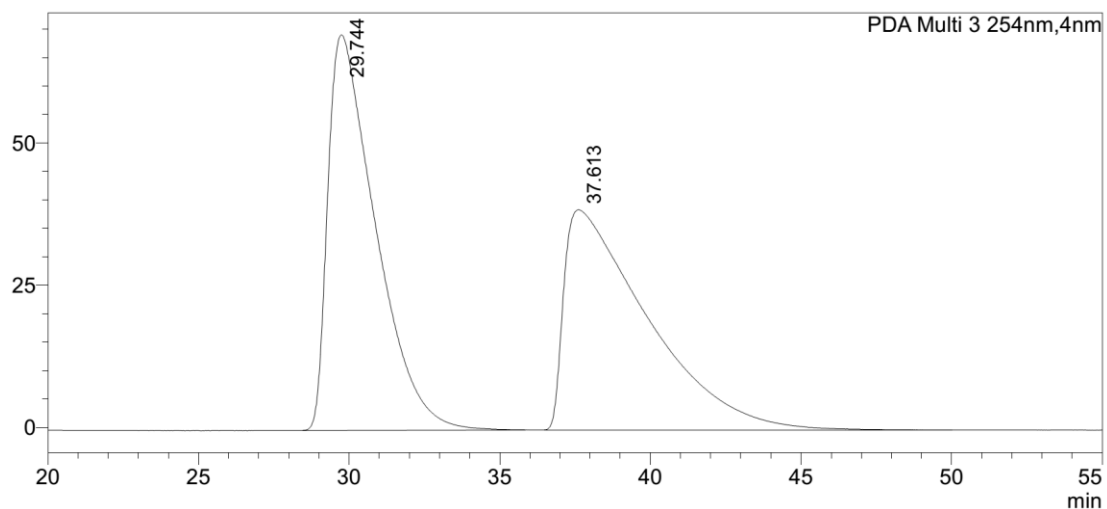

| Peak# | Ret. Time | Area%   |
|-------|-----------|---------|
| 1     | 29.744    | 50.596  |
| 2     | 37.613    | 49.404  |
| Total |           | 100.000 |

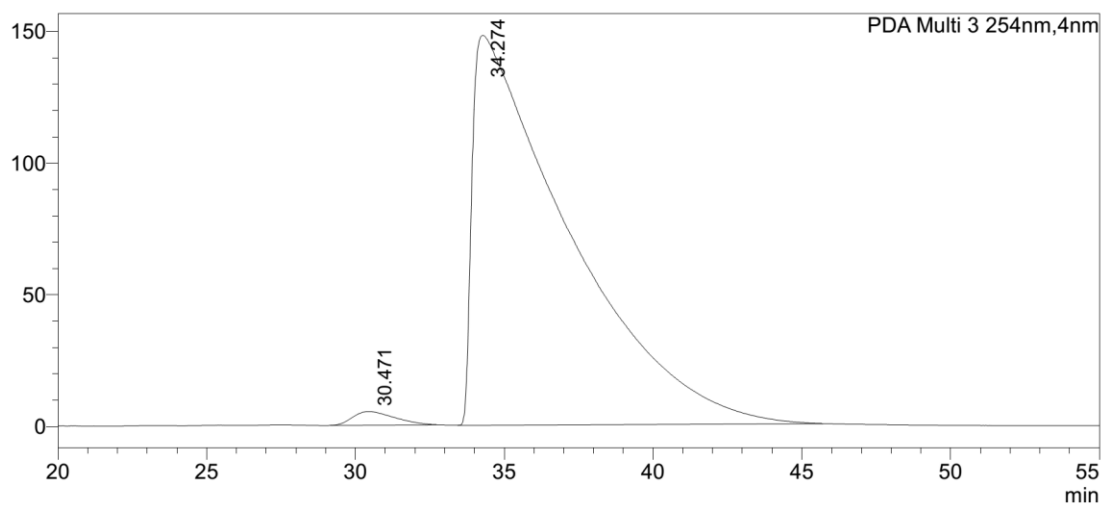

| Peak# | Ret. Time | Area%   |
|-------|-----------|---------|
| 1     | 30.471    | 1.517   |
| 2     | 34.274    | 98.483  |
| Total |           | 100.000 |



HPLC Data for **58**: Chiralcel OD-H (90:10 hexane : IPA, flow rate 1.00 mL.min<sup>-1</sup>, 254 nm, 30 °C) t<sub>R</sub> (minor): 15.9 min, t<sub>R</sub> (major): 19.5 min, 98:2 er.

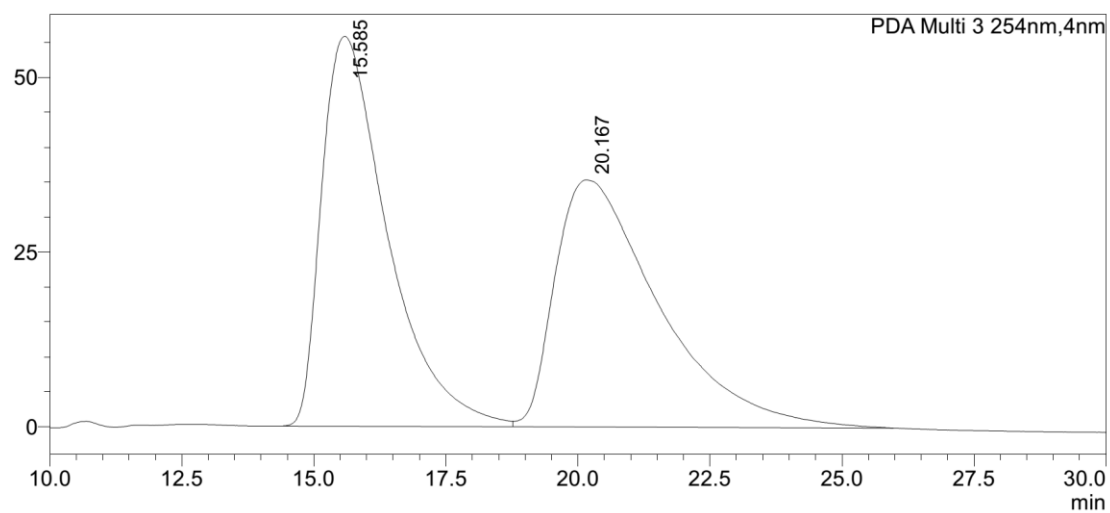

| Peak# | Ret. Time | Area%   |
|-------|-----------|---------|
| 1     | 15.585    | 50.062  |
| 2     | 20.167    | 49.938  |
| Total |           | 100.000 |

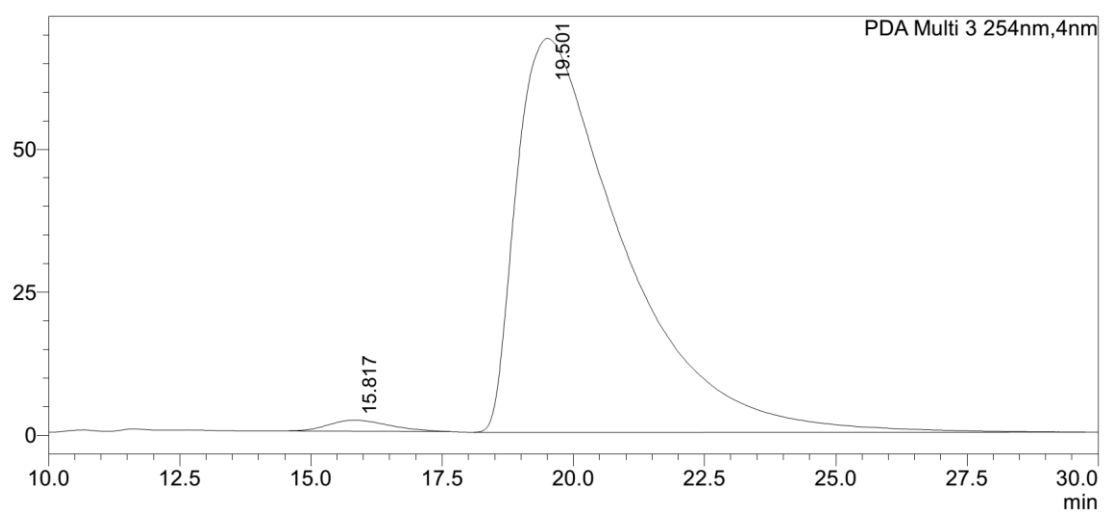

| Peak# | Ret. Time | Area%   |
|-------|-----------|---------|
| 1     | 15.817    | 1.587   |
| 2     | 19.501    | 98.413  |
| Total |           | 100.000 |

HPLC Data for **59**: Chiralcel IC (93:7 hexane : IPA, flow rate 1.00 mL.min<sup>-1</sup>, 254 nm, 50 °C) t<sub>R</sub> (major): 52.7 min, t<sub>R</sub> (minor): 67.8 min, 93:7 er.

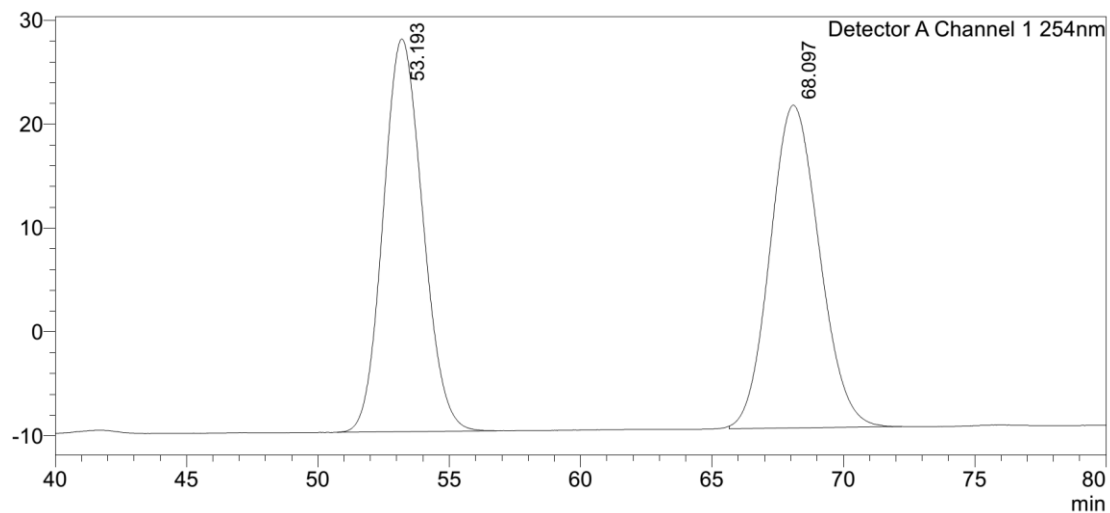

| Peak# | Ret. Time | Area%   |
|-------|-----------|---------|
| 1     | 53.193    | 49.366  |
| 2     | 68.097    | 50.634  |
| Total |           | 100.000 |

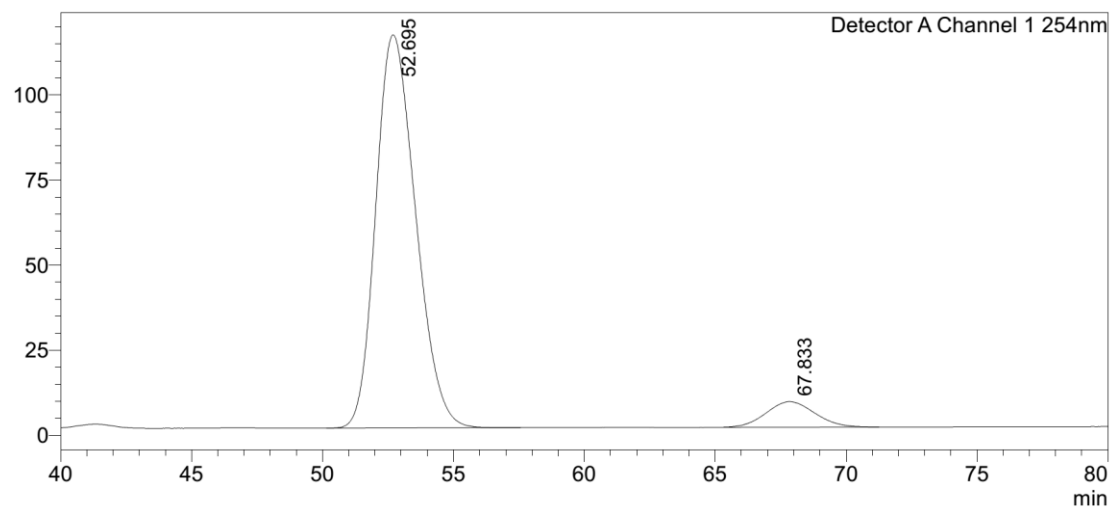

| Peak# | Ret. Time | Area%   |
|-------|-----------|---------|
| 1     | 52.695    | 92.676  |
| 2     | 67.833    | 7.324   |
| Total |           | 100.000 |

HPLC Data for **60**: Chiralcel OD-H (93:7 hexane : IPA, flow rate 1.00 mL.min<sup>-1</sup>, 254 nm, 30 °C) t<sub>R</sub> (major): 29.6 min, t<sub>R</sub> (minor): 53.2 min, 95:5 er.

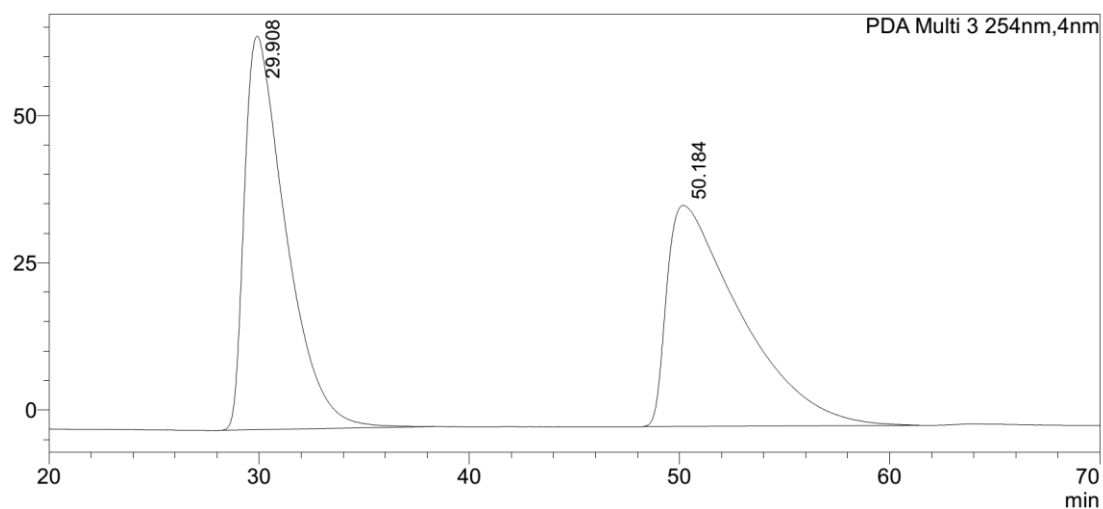

| Peak# | Ret. Time | Area%   |
|-------|-----------|---------|
| 1     | 29.908    | 49.962  |
| 2     | 50.184    | 50.038  |
| Total |           | 100.000 |

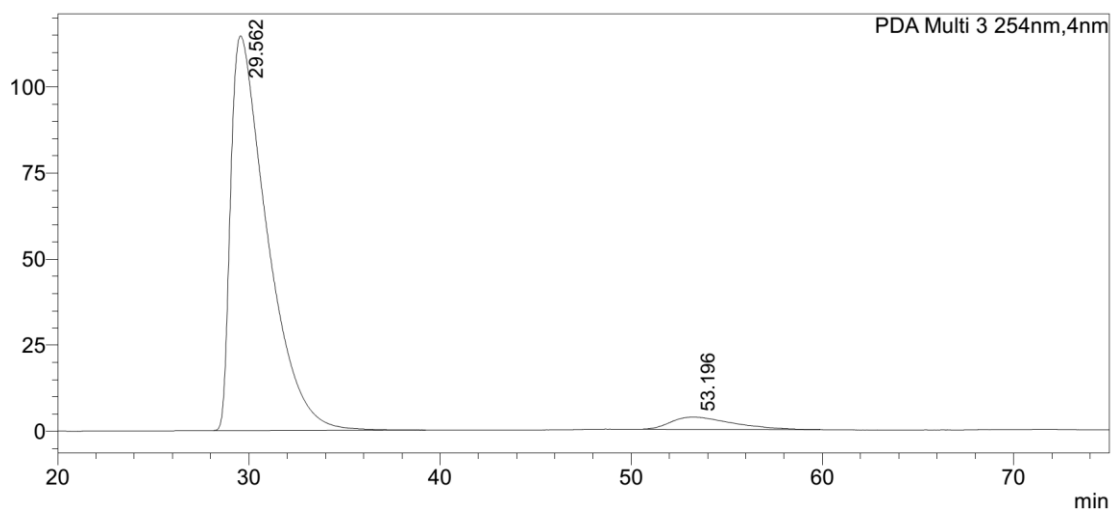

| Peak# | Ret. Time | Area%   |
|-------|-----------|---------|
| 1     | 29.562    | 95.022  |
| 2     | 53.196    | 4.978   |
| Total |           | 100.000 |

HPLC Data for **61**: Chiralcel OD-H (90:10 hexane : IPA, flow rate 1.00 mL.min<sup>-1</sup>, 254 nm, 30 °C) t<sub>R</sub> (major): 15.0, t<sub>R</sub> (minor): 34.1 min, 90:10 er.

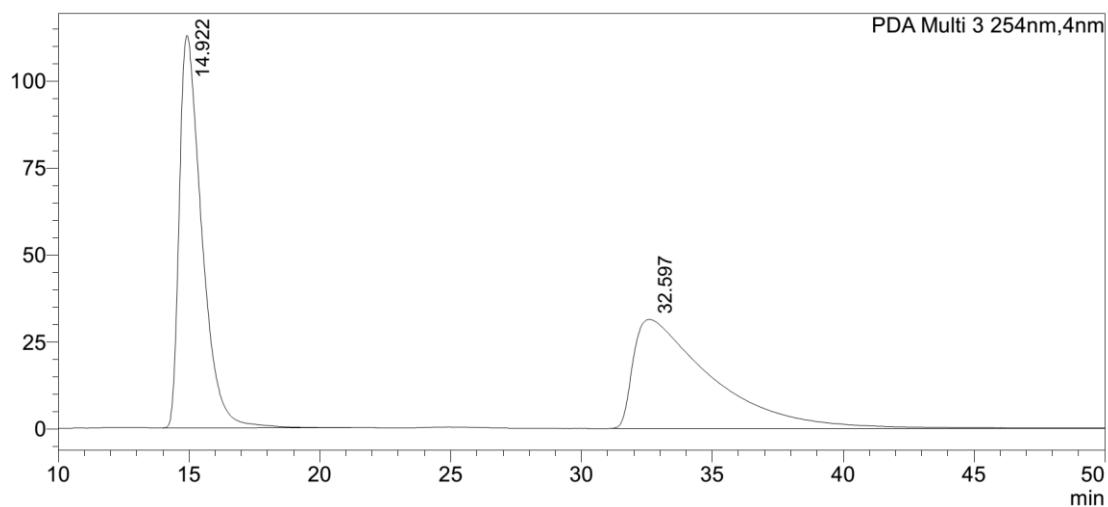

| Peak# | Ret. Time | Area%   |
|-------|-----------|---------|
| 1     | 14.922    | 50.903  |
| 2     | 32.597    | 49.097  |
| Total |           | 100.000 |

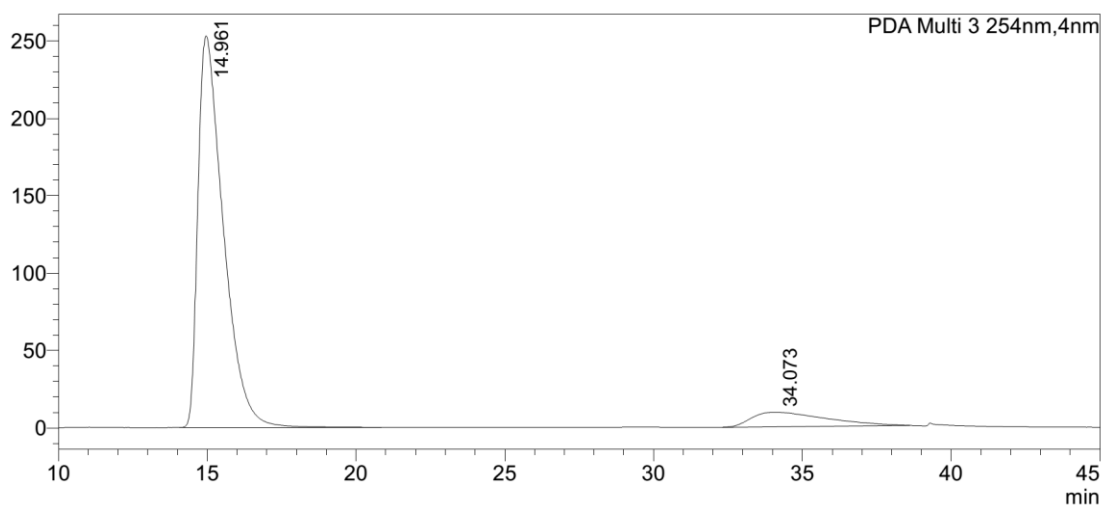

| Peak# | Ret. Time | Area%   |
|-------|-----------|---------|
| 1     | 14.961    | 90.202  |
| 2     | 34.073    | 9.798   |
| Total |           | 100.000 |

HPLC Data for **62**: Chiralcel OD-H (90:10 hexane : IPA, flow rate 1.00 mL.min<sup>-1</sup>, 254 nm, 30 °C) t<sub>R</sub> (major): 20.2 min, t<sub>R</sub> (minor): 27.7 min, >99:1 er.

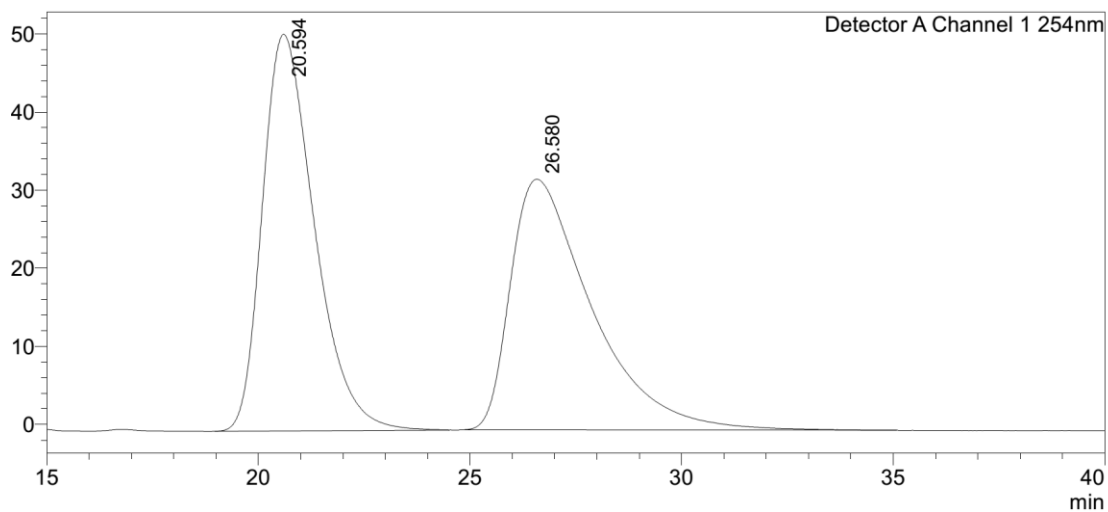

| Peak# | Ret. Time | Area%   |
|-------|-----------|---------|
| 1     | 20.594    | 50.309  |
| 2     | 26.580    | 49.691  |
| Total |           | 100.000 |

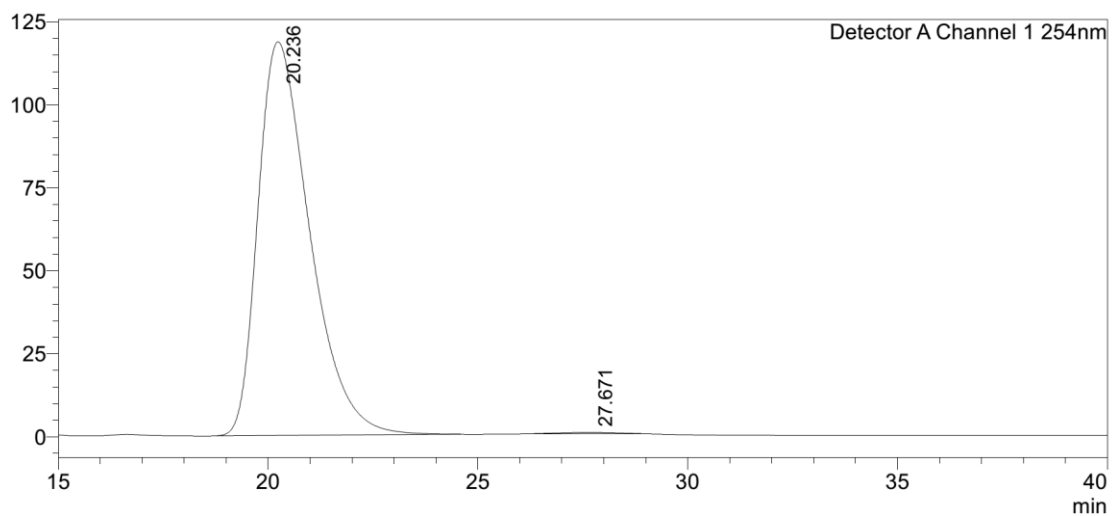

| Peak# | Ret. Time | Area%   |
|-------|-----------|---------|
| 1     | 20.236    | 99.636  |
| 2     | 27.671    | 0.364   |
| Total |           | 100.000 |

HPLC Data for **63**: Chiralcel OD-H (90:10 hexane : IPA, flow rate 1.00 mL.min<sup>-1</sup>, 254 nm, 30 °C) t<sub>R</sub> (major): 30.2 min, t<sub>R</sub> (minor): 52.1 min, 99:1 ee.

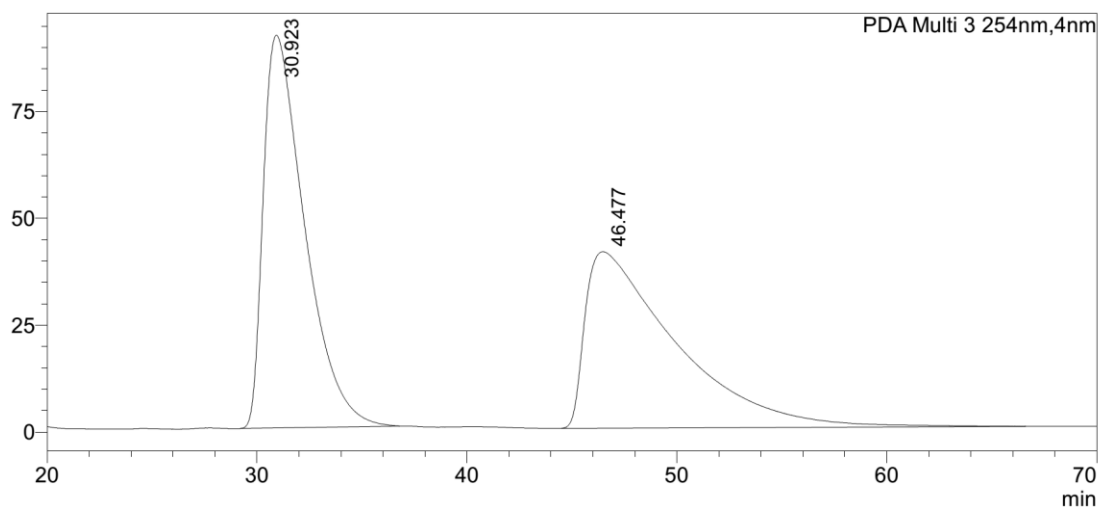

| Peak# | Ret. Time | Area%   |
|-------|-----------|---------|
| 1     | 30.923    | 50.394  |
| 2     | 46.477    | 49.606  |
| Total |           | 100.000 |

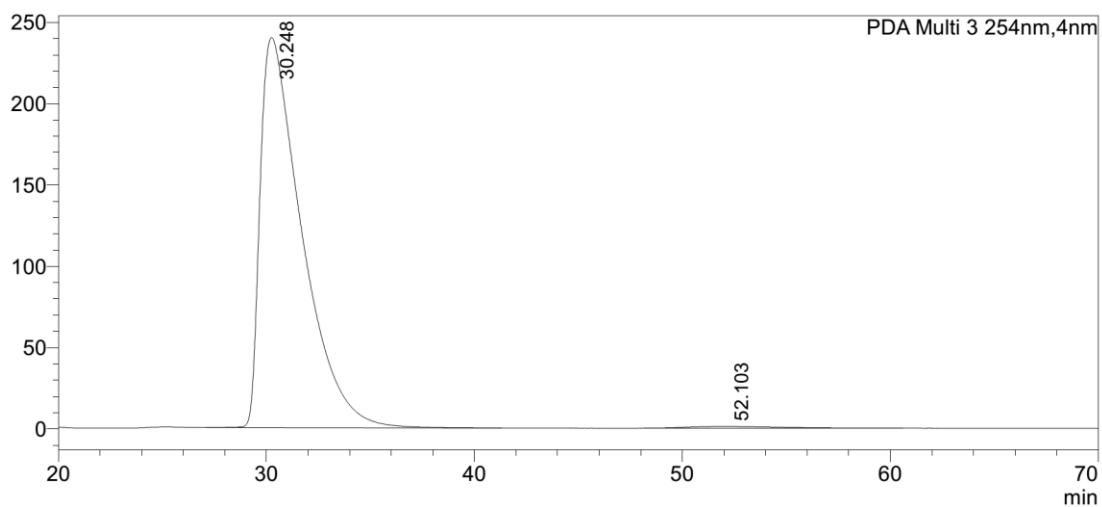

| Peak# | Ret. Time | Area%   |
|-------|-----------|---------|
| 1     | 30.248    | 99.013  |
| 2     | 52.103    | 0.987   |
| Total |           | 100.000 |

HPLC Data for **64**: Chiralcel OD-H (90:10 hexane : IPA, flow rate 1.00 mL.min<sup>-1</sup>, 254 nm, 30 °C) t<sub>R</sub> (major): 22.2 min, t<sub>R</sub> (minor): 46.6 min, 98:2 er.

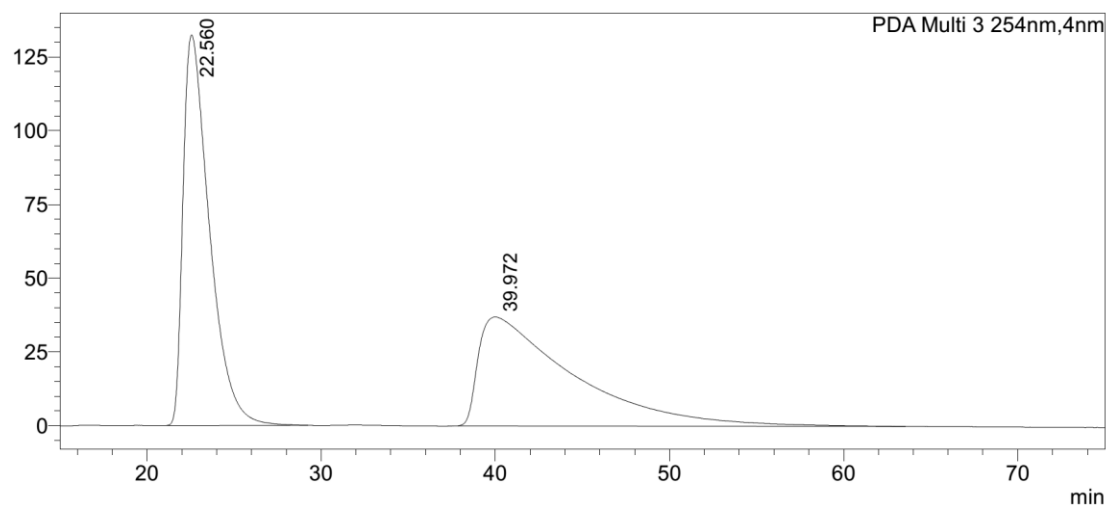

| Peak# | Ret. Time | Area%   |
|-------|-----------|---------|
| 1     | 22.560    | 50.141  |
| 2     | 39.972    | 49.859  |
| Total |           | 100.000 |

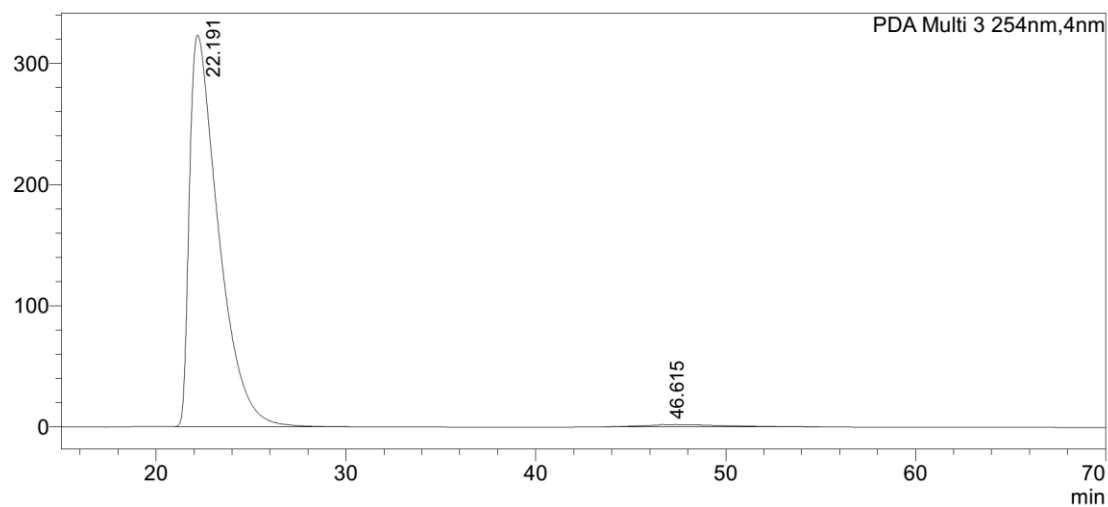

| Peak# | Ret. Time | Area%   |
|-------|-----------|---------|
| 1     | 22.191    | 98.355  |
| 2     | 46.615    | 1.645   |
| Total |           | 100.000 |

HPLC Data for **65**: Chiralcel OD-H (95:5 hexane : IPA, flow rate 1.00 mL.min<sup>-1</sup>, 254 nm, 30 °C) t<sub>R</sub> (major): 136.9 min, t<sub>R</sub> (minor): 201.3 min, 92:8 er.

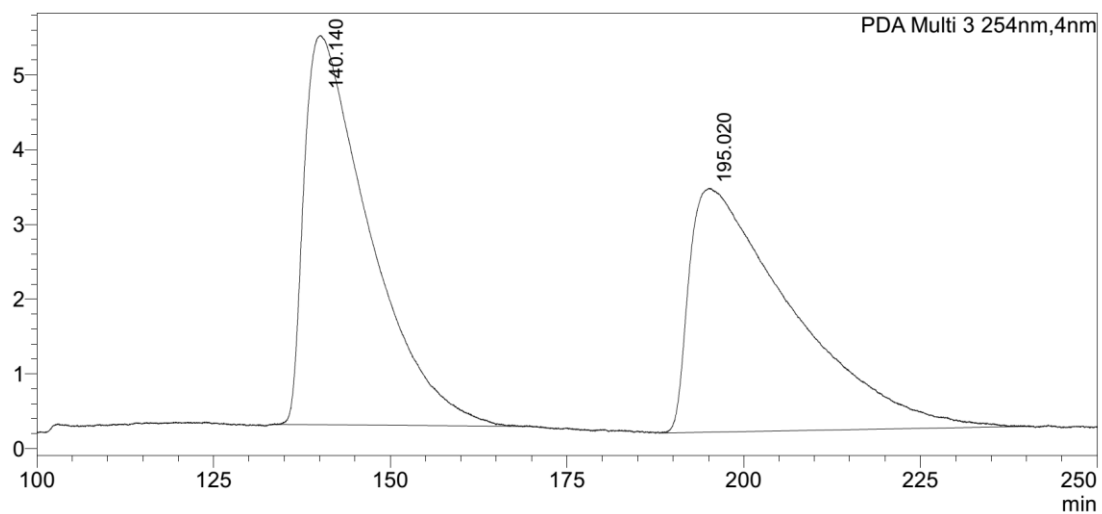

| Peak# | Ret. Time | Area%   |
|-------|-----------|---------|
| 1     | 140.140   | 50.320  |
| 2     | 195.020   | 49.680  |
| Total |           | 100.000 |

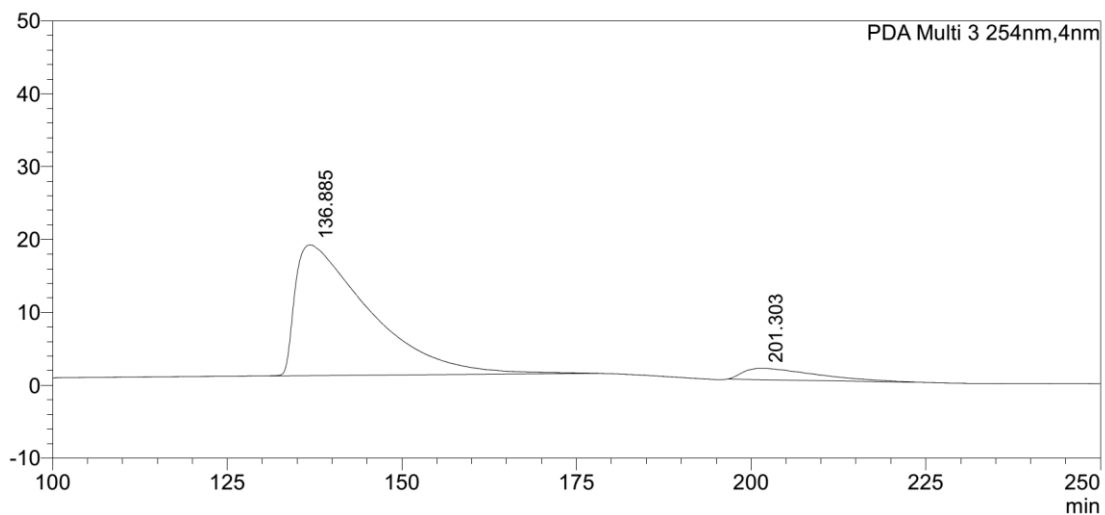

| Peak# | Ret. Time | Area%   |
|-------|-----------|---------|
| 1     | 136.885   | 92.190  |
| 2     | 201.303   | 7.810   |
| Total |           | 100.000 |



HPLC Data for **66**: Chiralcel OD-H (95:5 hexane : IPA, flow rate 1.00 mL.min<sup>-1</sup>, 254 nm, 30 °C) t<sub>R</sub> (major): 49.5 min, t<sub>R</sub> (minor): 62.2 min, 98:2 er.

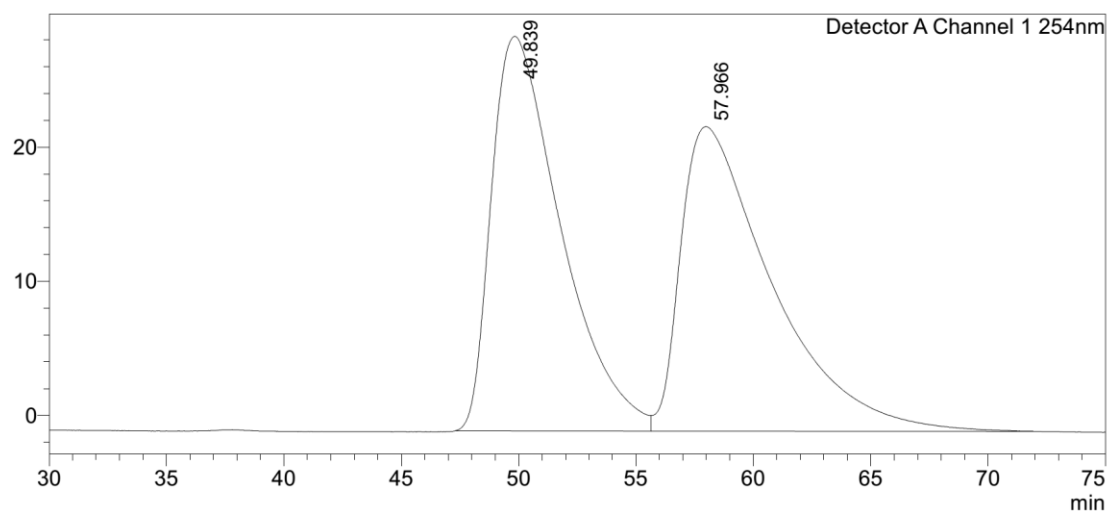

| Peak# | Ret. Time | Area%   |
|-------|-----------|---------|
| 1     | 49.839    | 49.732  |
| 2     | 57.966    | 50.268  |
| Total |           | 100.000 |

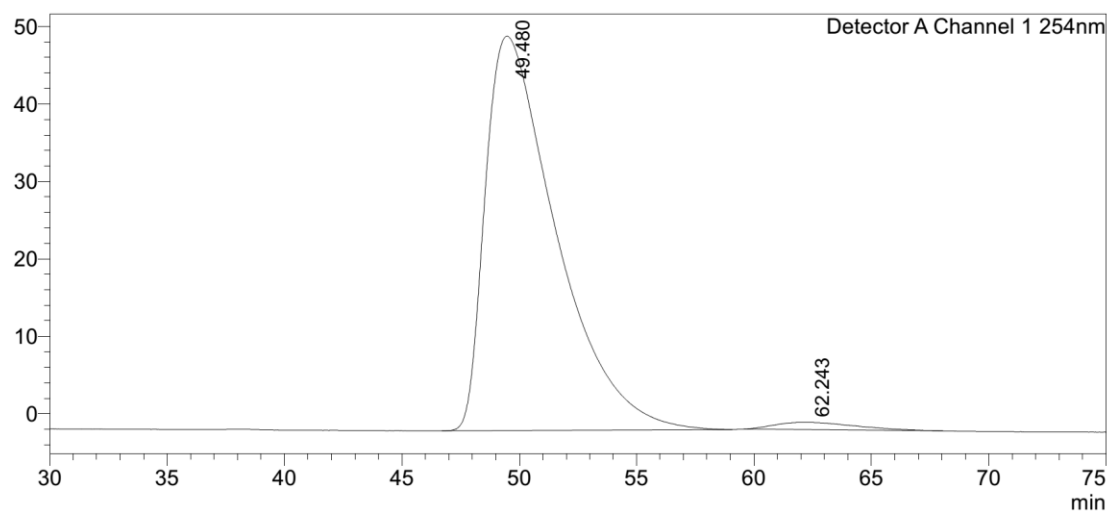

| Peak# | Ret. Time | Area%   |
|-------|-----------|---------|
| 1     | 49.480    | 97.889  |
| 2     | 62.243    | 2.111   |
| Total |           | 100.000 |

HPLC Data for **67**: Chiralcel OD-H (90:10 hexane : IPA, flow rate 1.00 mL.min<sup>-1</sup>, 254 nm, 30 °C) t<sub>R</sub> (major): 19.2 min, t<sub>R</sub> (minor): 26.1 min, 98:2 er.

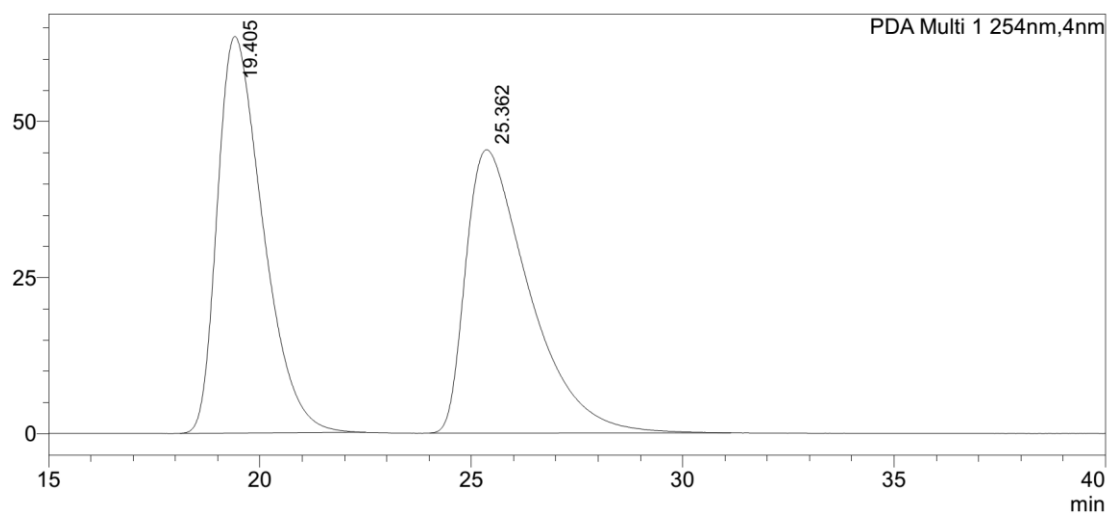

| Peak# | Ret. Time | Area%   |
|-------|-----------|---------|
| 1     | 19.405    | 50.121  |
| 2     | 25.362    | 49.879  |
| Total |           | 100.000 |

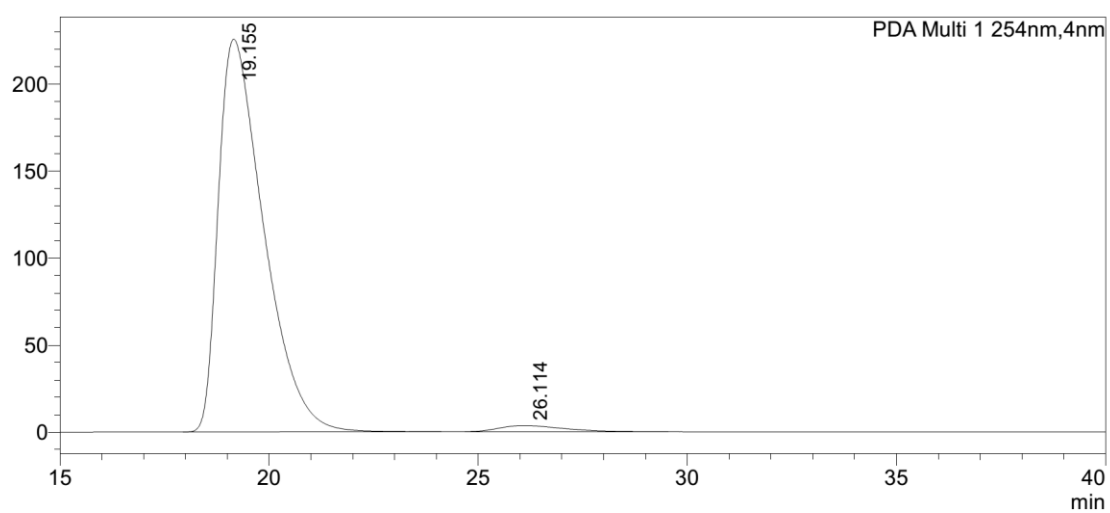

| Peak# | Ret. Time | Area%   |
|-------|-----------|---------|
| 1     | 19.155    | 97.802  |
| 2     | 26.114    | 2.198   |
| Total |           | 100.000 |

HPLC Data for **68**: Chiralcel OD-H (90:10 hexane : IPA, flow rate 1.00 mL.min<sup>-1</sup>, 254 nm, 30 °C) t<sub>R</sub> (major): 20.2 min, t<sub>R</sub> (minor): 27.5 min, >99:1 er.

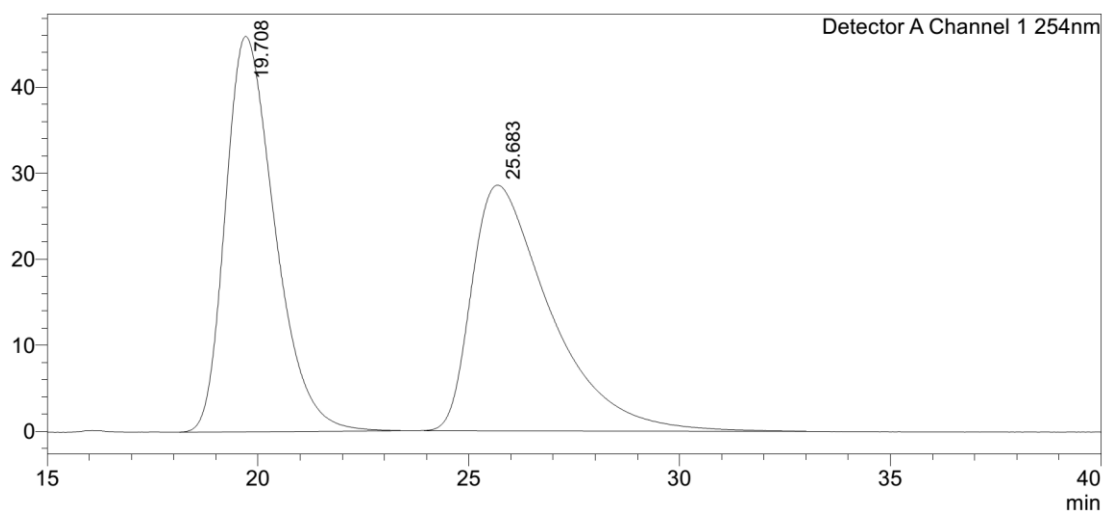

| Peak# | Ret. Time | Area%   |
|-------|-----------|---------|
| 1     | 19.708    | 50.271  |
| 2     | 25.683    | 49.729  |
| Total |           | 100.000 |

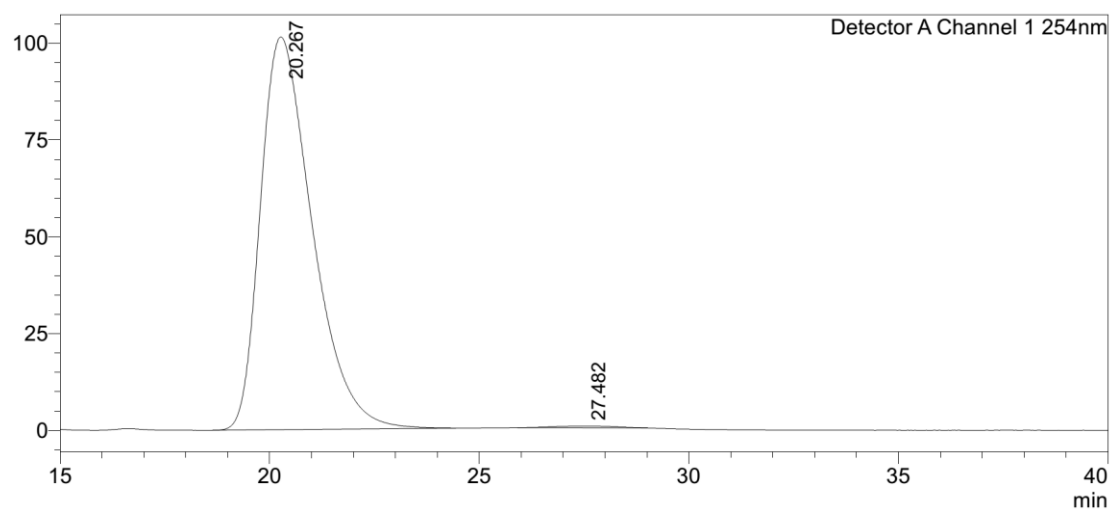

| Peak# | Ret. Time | Area%   |
|-------|-----------|---------|
| 1     | 20.267    | 99.464  |
| 2     | 27.482    | 0.536   |
| Total |           | 100.000 |

HPLC Data for **69**: Chiralcel OD-H (93:7 hexane : IPA, flow rate 1.00 mL.min<sup>-1</sup>, 254 nm, 30 °C) t<sub>R</sub> (major): 45.2 min, t<sub>R</sub> (minor): 57.4 min, 98:2 er.

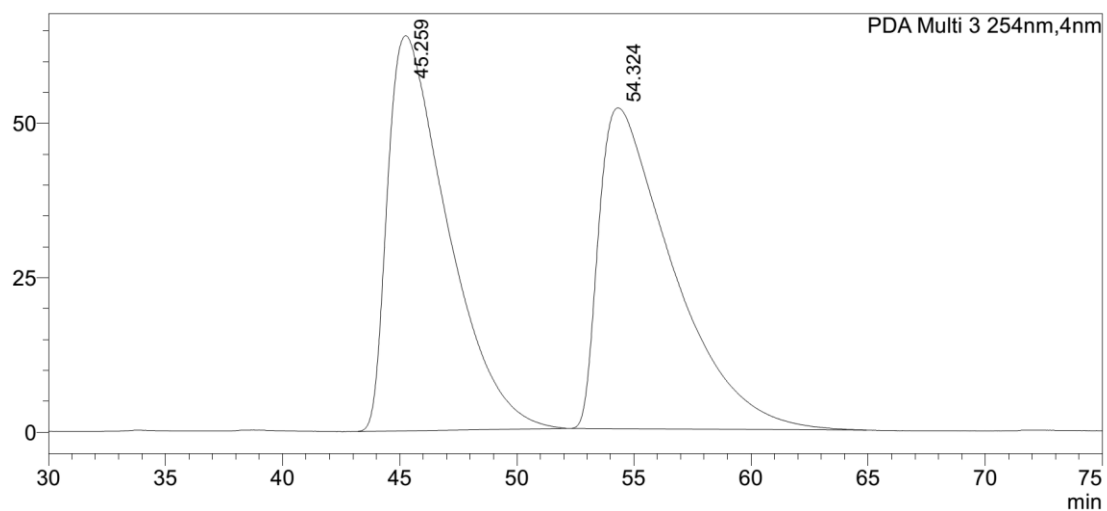

| Peak# | Ret. Time | Area%   |
|-------|-----------|---------|
| 1     | 45.259    | 49.993  |
| 2     | 54.324    | 50.007  |
| Total |           | 100.000 |

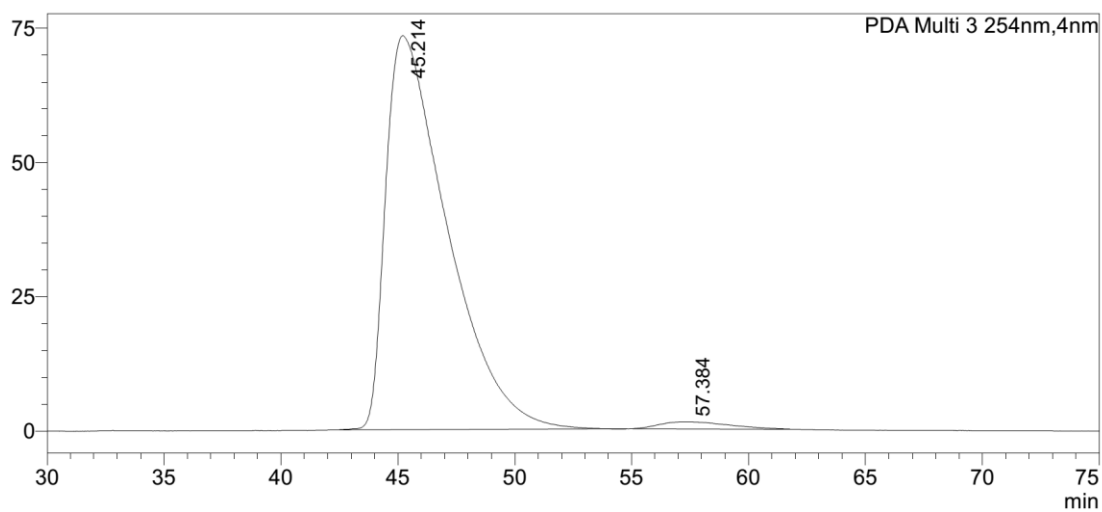

| Peak# | Ret. Time | Area%   |
|-------|-----------|---------|
| 1     | 45.214    | 98.022  |
| 2     | 57.384    | 1.978   |
| Total |           | 100.000 |

HPLC Data for **76**: Chiralcel IC (80:20 hexane : IPA, flow rate 1.50 mL.min<sup>-1</sup>, 254 nm, 40 °C) t<sub>R</sub> (major): 34.6, t<sub>R</sub> (minor): 41.7 min, 93:7 er.

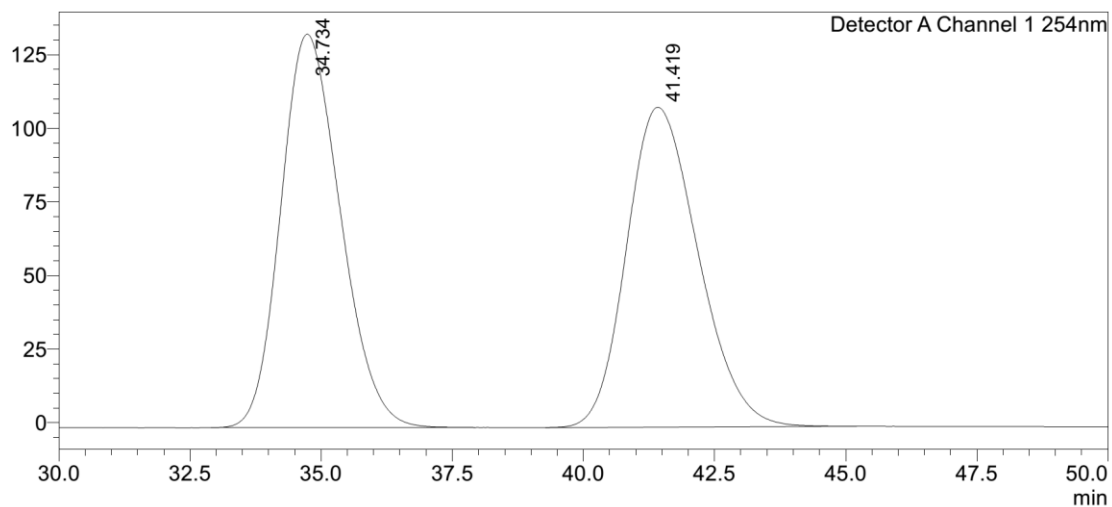

| Peak# | Ret. Time | Area%   |
|-------|-----------|---------|
| 1     | 34.734    | 50.574  |
| 2     | 41.419    | 49.426  |
| Total |           | 100.000 |

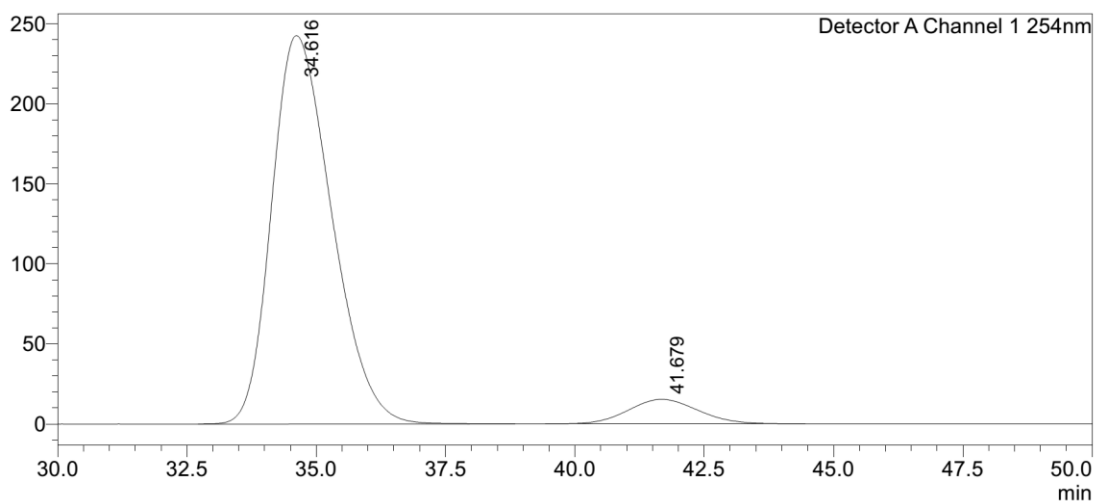

| Peak# | Ret. Time | Area%   |
|-------|-----------|---------|
| 1     | 34.616    | 93.146  |
| 2     | 41.679    | 6.854   |
| Total |           | 100.000 |

HPLC Data for 77: Chiralcel OD-H (93:7 hexane : IPA, flow rate 1.00 mL.min<sup>-1</sup>, 254 nm, 30 °C) t<sub>R</sub> (major): 34.4, t<sub>R</sub> (minor): 47.4 min, 98:2 er.

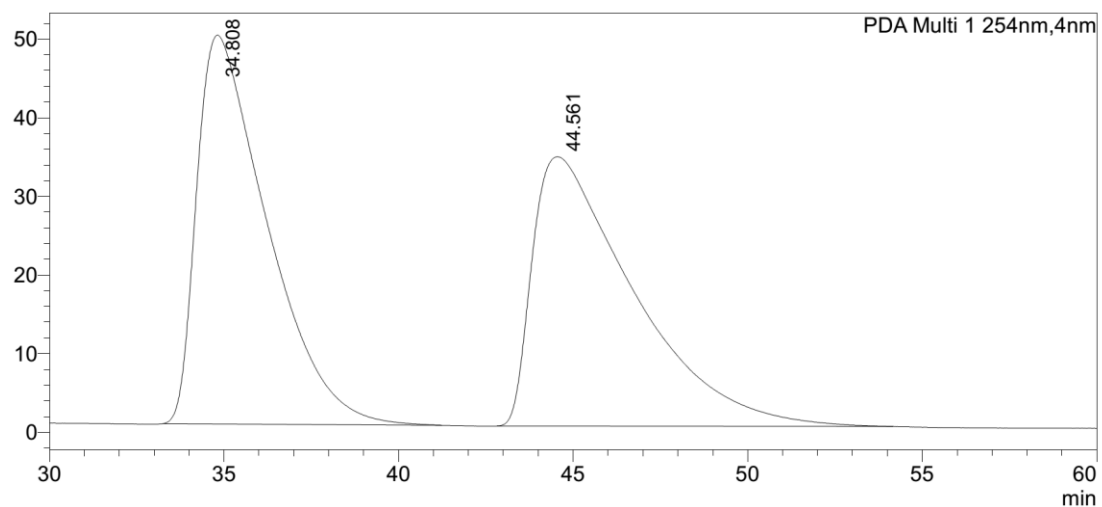

| Peak# | Ret. Time | Area%   |
|-------|-----------|---------|
| 1     | 34.808    | 50.104  |
| 2     | 44.561    | 49.896  |
| Total |           | 100.000 |

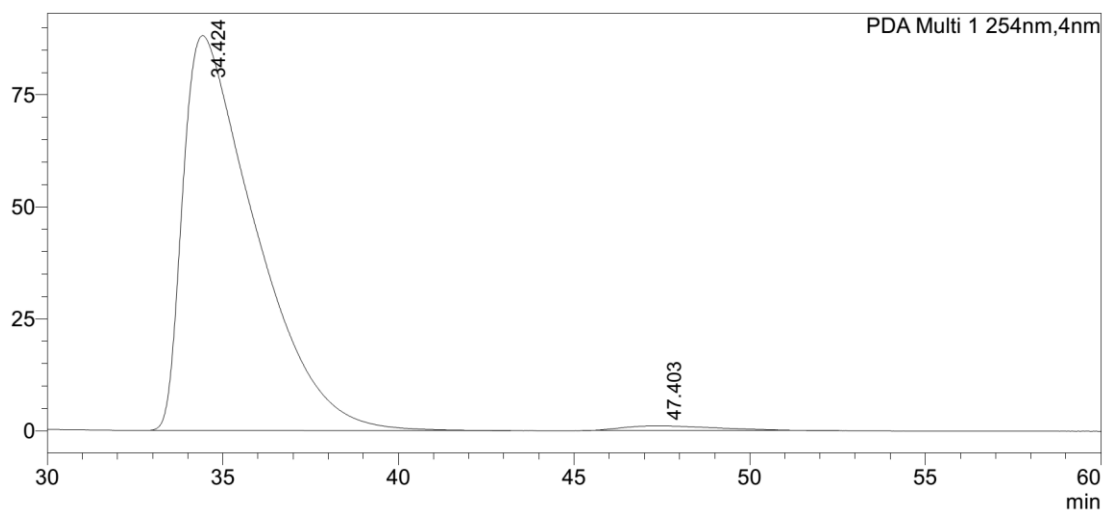

| Peak# | Ret. Time | Area%   |
|-------|-----------|---------|
| 1     | 34.424    | 98.370  |
| 2     | 47.403    | 1.630   |
| Total |           | 100.000 |

HPLC Data for **78**: Chiralcel OD-H (93:7 hexane : IPA, flow rate 1.00 mL.min<sup>-1</sup>, 254 nm, 30 °C) t<sub>R</sub> (major): 35.7, t<sub>R</sub> (minor): 47.5 min, 99:1 er.

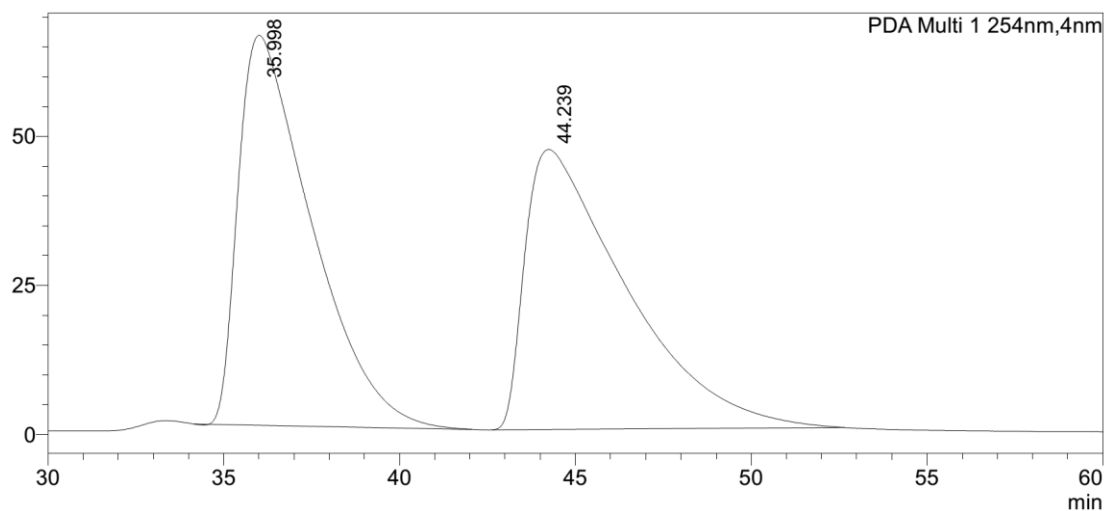

| Peak# | Ret. Time | Area%   |
|-------|-----------|---------|
| 1     | 35.998    | 50.263  |
| 2     | 44.239    | 49.737  |
| Total |           | 100.000 |

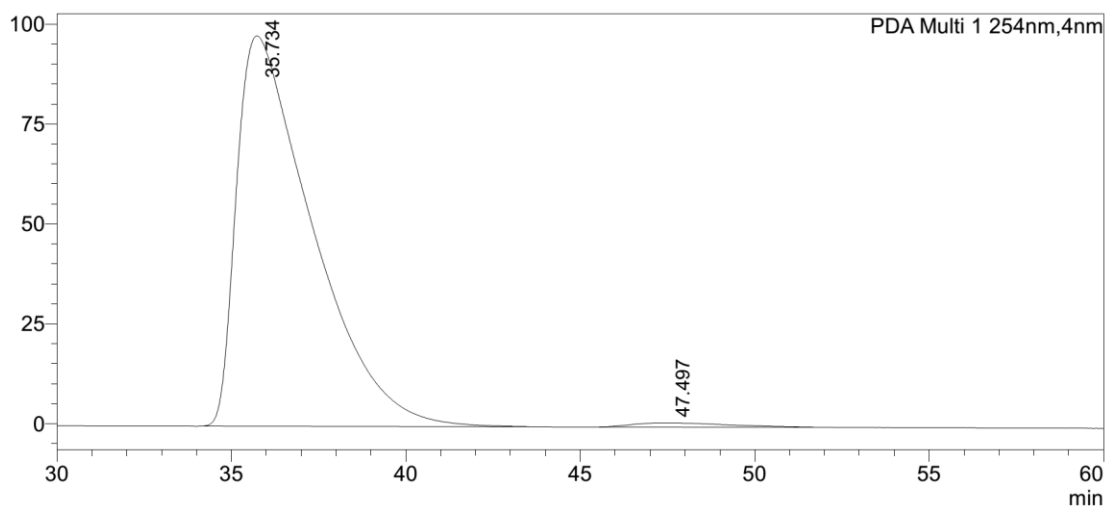

| Peak# | Ret. Time | Area%   |
|-------|-----------|---------|
| 1     | 35.734    | 98.690  |
| 2     | 47.497    | 1.310   |
| Total |           | 100.000 |

HPLC Data for **79**: Chiralcel OD-H (93:7 hexane : IPA, flow rate 1.00 mL.min<sup>-1</sup>, 254 nm, 30 °C) t<sub>R</sub> (major): 51.8, t<sub>R</sub> (minor): 66.3 min, 86:14 er.

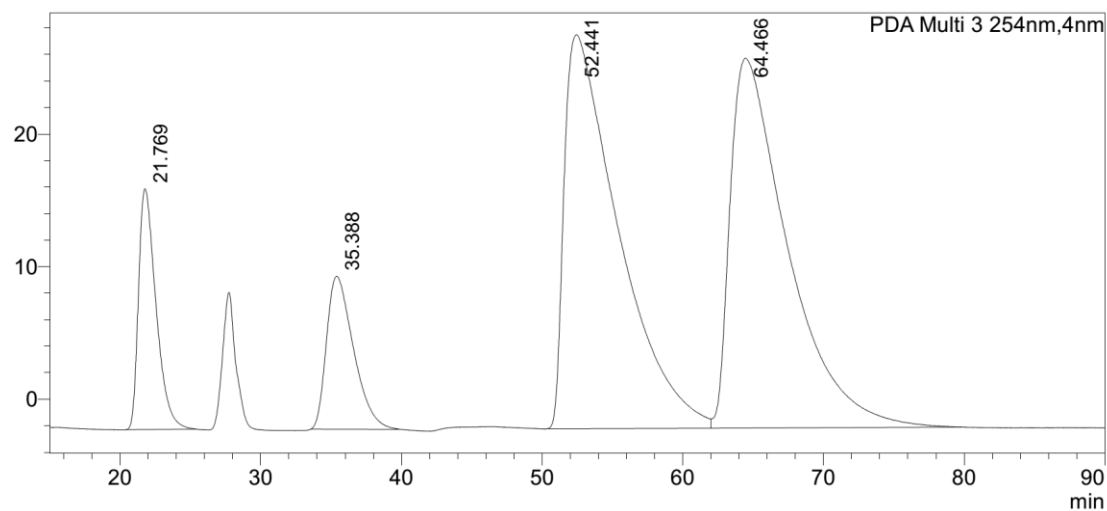

| Peak# | Ret. Time | Area%   |
|-------|-----------|---------|
| 1     | 21.769    | 8.252   |
| 2     | 35.388    | 8.121   |
| 3     | 52.441    | 41.844  |
| 4     | 64.466    | 41.783  |
| Total |           | 100.000 |

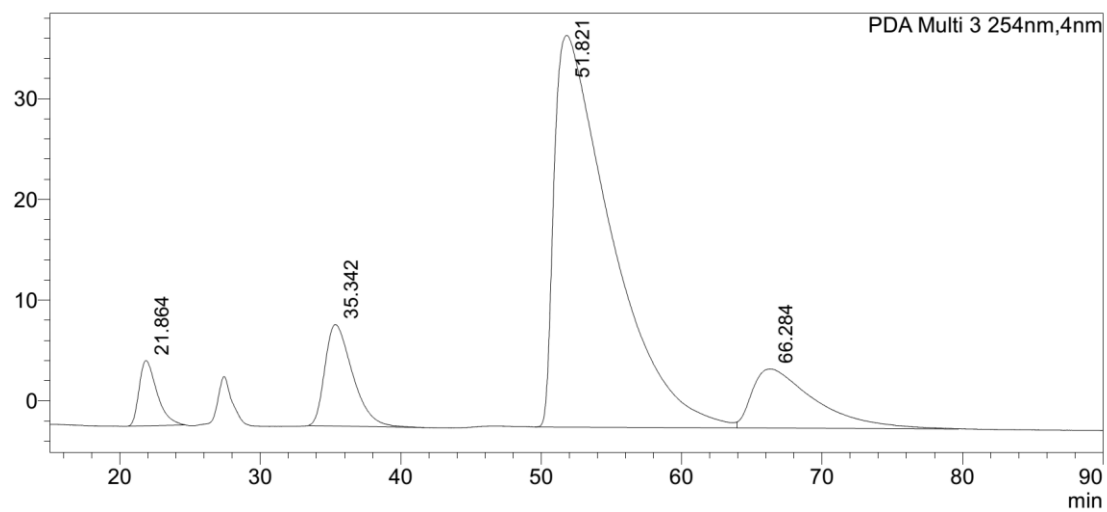

| Peak# | Ret. Time | Area%   |
|-------|-----------|---------|
| 1     | 21.864    | 3.869   |
| 2     | 35.342    | 9.355   |
| 3     | 51.821    | 74.439  |
| 4     | 66.284    | 12.337  |
| Total |           | 100.000 |



HPLC Data for **80<sub>major</sub>** and **80<sub>minor</sub>**: Chiralcel IC (90:10 hexane : IPA, flow rate 0.50 mL.min<sup>-1</sup>, 254 nm, 40 °C) t<sub>R</sub> (minor): 49.1, t<sub>R</sub> (major): 128.1 min, 99:1 er; t<sub>R</sub> (major): 173.9 min, t<sub>R</sub> (minor): 185.9, 79:21 er.

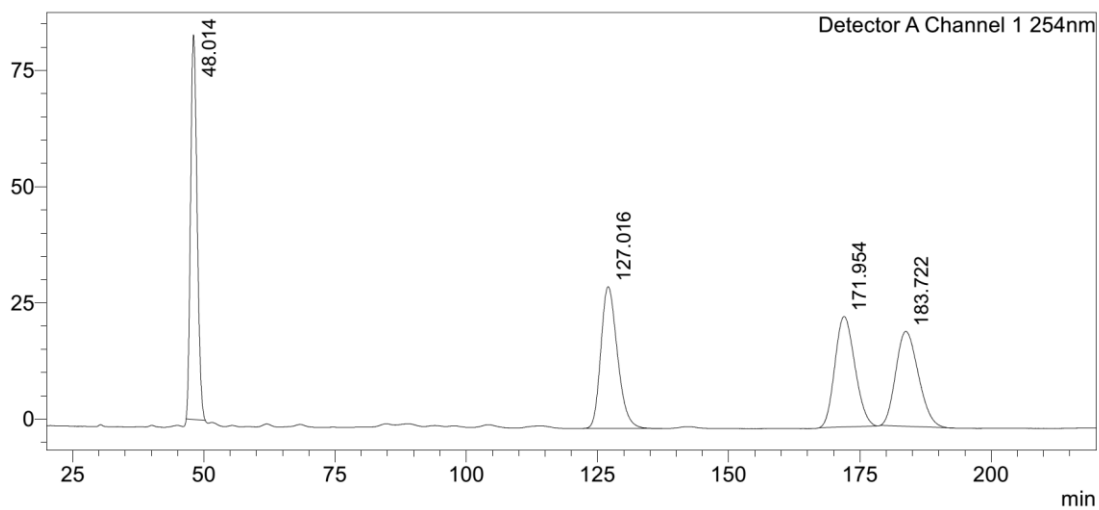

| Peak# | Ret. Time | Area%   |
|-------|-----------|---------|
| 1     | 48.014    | 27.270  |
| 2     | 127.016   | 25.545  |
| 3     | 171.954   | 23.899  |
| 4     | 183.722   | 23.286  |
| Total |           | 100.000 |

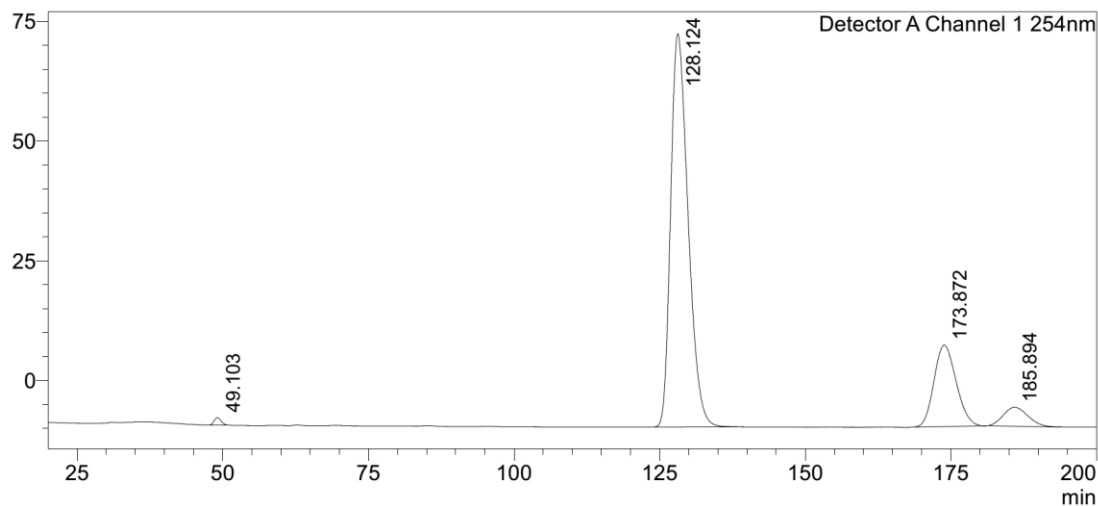

| Peak# | Ret. Time | Area%   |
|-------|-----------|---------|
| 1     | 49.103    | 0.556   |
| 2     | 128.124   | 74.746  |
| 3     | 173.872   | 19.623  |
| 4     | 185.894   | 5.075   |
| Total |           | 100.000 |

HPLC Data for **81**<sub>major</sub>: Chiralcel OD-H (85:15 hexane : IPA, flow rate 1.00 mL.min<sup>-1</sup>, 254 nm, 30 °C)  
 $t_R$  (major): 23.5,  $t_R$  (minor): 31.1 min, 97:3 er.

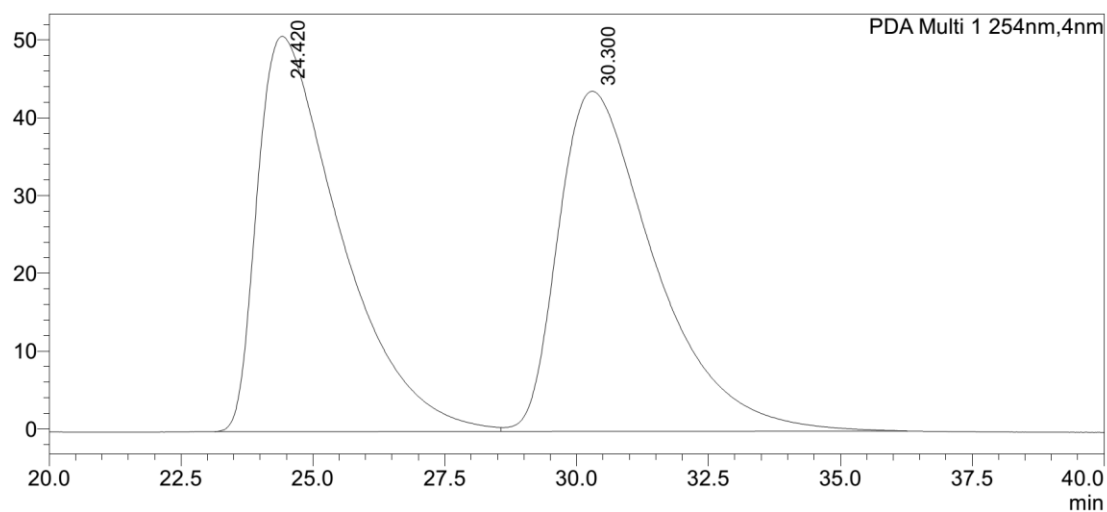

| Peak# | Ret. Time | Area%   |
|-------|-----------|---------|
| 1     | 24.420    | 50.013  |
| 2     | 30.300    | 49.987  |
| Total |           | 100.000 |

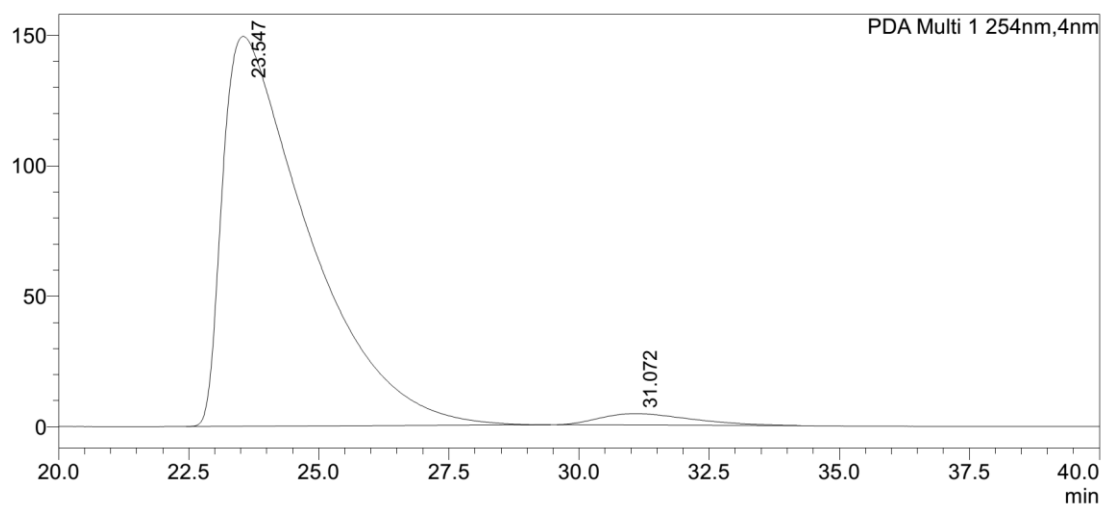

| Peak# | Ret. Time | Area%   |
|-------|-----------|---------|
| 1     | 23.547    | 96.952  |
| 2     | 31.072    | 3.048   |
| Total |           | 100.000 |

HPLC Data for **81**<sub>minor</sub>: Chiralcel OD-H (85:15 hexane : IPA, flow rate 1.00 mL.min<sup>-1</sup>, 254 nm, 30 °C)

t<sub>R</sub> (minor): 11.8 min , t<sub>R</sub> (major): 14.7, 6:94 er.

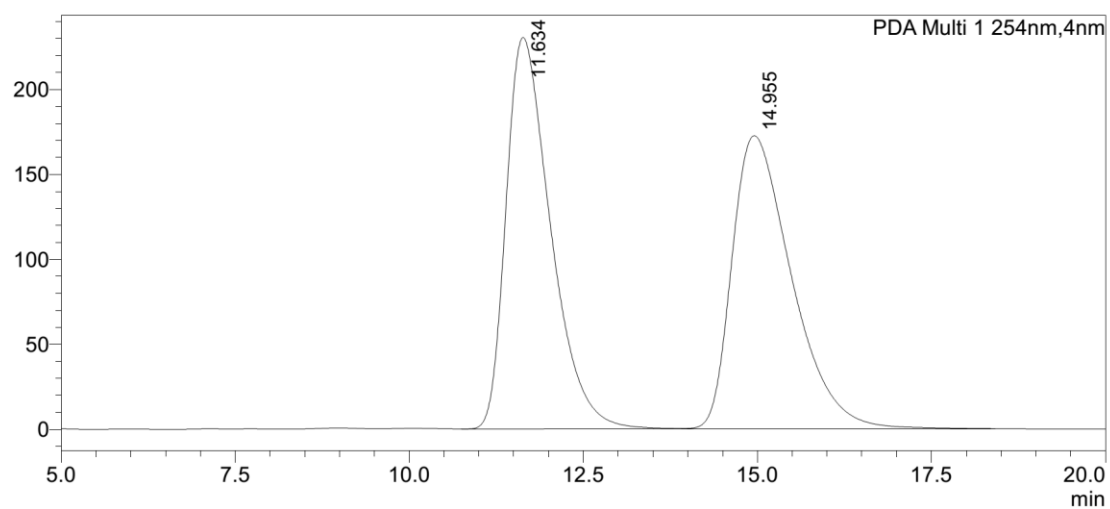

| Peak# | Ret. Time | Area%   |
|-------|-----------|---------|
| 1     | 11.634    | 49.984  |
| 2     | 14.955    | 50.016  |
| Total |           | 100.000 |

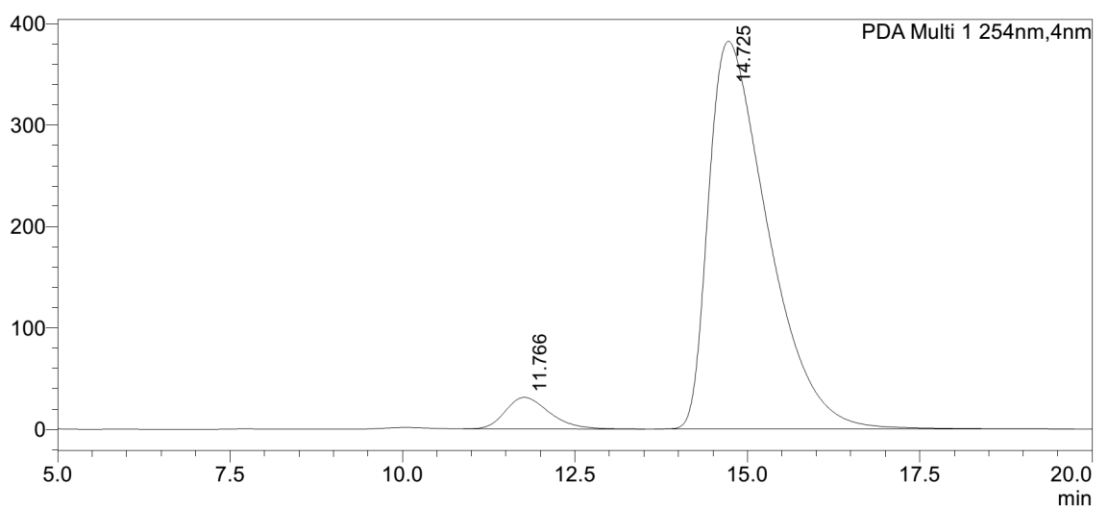

| Peak# | Ret. Time | Area%   |
|-------|-----------|---------|
| 1     | 11.766    | 5.716   |
| 2     | 14.725    | 94.284  |
| Total |           | 100.000 |
